# Supplementary material for: How people wake up is associated with previous night’s sleep together with physical activity and food intake
Source: Nat Commun. 2022 Nov 19;13:7116. doi: 10.1038/s41467-022-34503-2 (PMC9675783; doi:10.1038/s41467-022-34503-2)
Supplement: Supplementary file 3 — Source data [file 41467_2022_34503_MOESM3_ESM.xlsx]

## Sheet: Fig 1
		Figure 1 is a schematic figure and does not contain any data.

## Sheet: Fig 2
Panel A			Panel B		Panel C			Panel D
Time of day (hour)	Alertness		Alertness rating: time of day (radians)		Time since breakfast start	Alertness		Breakfast start time (hours)
8	53		2.1293		0.0116667	53		8.1225
9	54		2.58745		1.76833	54		9.1
10	58		2.77944		2.50722	58
9	64		2.38237		0.0122222	64		9.61861
9	31		2.55691		0.675	31		10.3411
10	37		2.77507		1.50611	37		10.0814
11	57		3.03687		2.515	57		8.02083
13	24		3.40776		0.00916667	48		8.25417
13	34		3.53866		0.505833	33		9.24972
14	52		3.80482		1.50333	61		10.565
15	38		4.06225		2.51722	65		10.5033
18	61		4.95674		-0.0458333	47		9.86667
20	63		5.36689		0.997778	71		7.68167
9	35		2.522		0.522222	29		8.39361
10	43		2.7009		2.15361	51		7.88583
11	36		2.91906		-0.333889	34		9.56028
12	68		3.24195		-0.319444	46		8.94306
13	61		3.63028		0.0025	49
15	66		4.01426		1.07361	35		7.59722
15	73		4.08407		-0.0797222	56
16	64		4.19315		2.44583	71
17	60		4.45495		2.50333	23
9	48		2.51764		-0.0141667	76		10.1458
10	33		2.64854		0.552778	31		6.69944
11	61		2.91034		1.50556	81		6.83111
12	65		3.1765		2.26	30		6.17056
13	41		3.54302		2.50306	51		6.75444
15	64		4.03171		-0.113056	33		10.2417
15	57		4.11461		0.520556	31
17	74		4.5204		1.505	44
10	47		2.69217		-0.0591667	81		7.98111
11	71		2.96706		0.506667	73		8.19639
21	73		5.62869		1.81167	77		8.27083
10	29		2.77507		-0.0716667	32		6.74944
12	51		3.20268		0.568889	21		6.7075
20	72		5.37998		0.0025	75		6.95111
21	65		5.63305		0.739722	33		7.055
7	34		2.01149		1.505	59		6.89028
7	46		2.01586		-0.311111	89		8.2
8	49		2.09876		-0.2575	59		8.81667
9	35		2.37801		-0.118333	66		8.16667
18	52		4.89129		0.505556	81		8.48333
19	70		5.02218		-0.0805556	89		8.71667
20	28		5.28398		0.5075	47		8.91667
21	57		5.62869		1.89611	80		9.98333
12	64		3.17214		0.00916667	32		9.13333
12	67		3.34231		0.516389	54		9.18333
14	52		3.72628		0.765556	56
16	67		4.19315		0.00861111	84
17	68		4.5204		0.502778	91		8.76667
17	75		4.66876		1.06917	83		9.06667
20	76		5.36252		2.66333	87		9
21	83		5.52833		-0.0311111	95		8.96667
21	66		5.62432		1.60611	62		9
9	56		2.39983		2.55778	72		8.15
11	71		3.05869		-0.0144444	85		8.41667
11	23		3.07614		0.502778	98		7.61667
13	67		3.46012		2.22694	90		8.5
14	55		3.72628		0.3575	83		9.13333
14	76		3.8659		0.00166667	84		8.46667
15	40		4.1277		0.261111	85		8.73333
17	59		4.70366		1.47528	88
19	96		5.1269		2.50222	86
10	76		2.76198		0.00166667	75		9.01667
11	31		2.91034		0.505278	79		8.71667
12	81		3.15905		1.50222	49		9.73333
12	30		3.3554		2.69	96		9.41667
13	51		3.42085		-0.0113889	95		9.15
16	75		4.35896		0.530556	98		7.33333
17	76		4.59458		1.79194	97		10.1333
18	87		4.75602		2.50278	96		7.66667
19	39		5.14872		-0.0211111	99		9.2
19	71		5.16617		1.08639	80		8.58333
23	66		6.0432		1.81694	71		9.45
10	33		2.71835		2.50333	89
11	31		2.88416		0.00277778	92
12	44		3.14159		0.608889	95		9
13	65		3.58229		1.50333	95		9.33333
15	54		4.1757		2.97361	94		6.83333
16	61		4.3066		-0.0113889	95		9.16667
16	56		4.35896		0.693333	93		6.81667
17	71		4.5684		1.7225	91		10.1
19	74		4.97855		2.94528	91		8.8
19	55		5.03527		-0.0313889	96
21	63		5.69414		0.501667	99		9.78333
9	81		2.56563		1.65944	94		10.3833
10	73		2.71399		2.68861	92		11.0333
11	77		3.05433		-0.0311111	90		7.20639
17	68		4.6513		0.586667	82		9.34194
18	64		4.88256		-0.0355556	79		8.48056
20	72		5.28835		0.502778	85		7.37528
20	63		5.33634		2.53278	93		8.05806
21	49		5.59814		2.59556	93		8.54528
21	65		5.69414		-0.0636111	85		6.90722
7	32		1.98968		0.511111	91		6.96417
8	21		2.15984		1.5025	85		7.34194
21	67		5.72904		2.50278	94		9.345
8	75		2.19475		-0.496944	80
9	33		2.3911		-0.0241667	91		6.83417
9	59		2.58745		1.31083	93		6.47806
13	66		3.54738		1.53833	92		7.08667
14	67		3.7001		0.180556	88		9.41361
17	76		4.60331		0.239167	91		9.12028
18	82		4.94365		1.98417	97		7.52056
19	83		4.97855		-0.00611111	90		7.39417
19	76		5.00473		1.58944	91		7.41639
19	79		5.1269		2.79194	77		8.18389
20	87		5.31016		0.0197222	82		7.41361
21	90		5.58069		0.508333	68		7.93611
21	69		5.69414		2.01194	52		6.99778
7	89		1.98095		2.50333	50		8.46944
7	59		1.99404		0.0158333	93		8.82833
7	66		2.03331		1.51083	88		7.0375
8	81		2.19475		-0.085	92		6.97667
12	71		3.26813		0.304722	96		6.64806
18	84		4.74293		1.66278	89		8.22556
18	78		4.93492		2.51111	72		7.34778
20	85		5.24035		-0.0105556	90		9.42639
23	85		6.06938		1.07278	76		9.39528
9	89		2.47837		1.53639	81		9.57028
10	47		2.63545		2.89861	79		7.50528
11	80		2.9976		-0.0644444	95		10.7
12	58		3.34231		1.94194	88		8.58333
13	69		3.58665		1.96278	93		9.13333
16	79		4.32405		2.63972	92		9.7
20	77		5.3887		1.51167	86		7.33333
21	26		5.64614		-0.163611	79		7.36667
22	71		5.77268		-0.152778	76		7.21667
23	64		6.06938		0.534722	90		8.68333
8	32		2.3431		1.7375	94		7.11667
9	54		2.474		2.88111	99		9.83333
12	65		3.14159		0.00694444	79		8.1
20	66		5.31453		1.52694	93		10.75
23	83		6.14356		2.59778	96
9	77		2.59618		0.00833333	88		7.73333
10	55		2.74889		1.56694	94		7.51667
13	54		3.61719		0.0119444	77		10.5167
15	88		4.05789		0.510278	83
19	63		5.18799		2.37889	70		7.91667
21	83		5.52833		0.673056	98		9.58333
21	6		5.72032		2.01639	78
8	56		2.18602		-0.0241667	87		10.3333
12	51		3.14596		0.758333	92
12	51		3.21141		2.58333	96		11.0886
17	62		4.53786		-0.0358333	89		8.97444
18	55		4.89129		0.505833	93		8.655
20	47		5.41052		1.58028	97		7.49972
21	56		5.62869		-0.0638889	80		6.40278
21	77		5.69414		0.519444	98		6.25194
6	32		1.7017		1.99361	100
8	46		2.12494		-0.0333333	96
8	45		2.24275		0.813889	97		6.15361
9	43		2.61363		1.62472	91		9.75417
10	54		2.79689		2.52333	92		7.56583
12	75		3.24631		-0.238056	91		11.1436
12	69		3.31613		1.87139	84
13	70		3.63901		0.00694444	76		8.0025
14	80		3.79173		2.025	23		8.08778
15	71		4.16261		2.50694	82		8.42417
16	62		4.30224		-0.0866667	78		4.55722
16	85		4.44623		1.06417	70		7.82889
17	67		4.62949		2.55833	87		7.23694
18	78		4.84765		2.56083	82		7.92306
20	42		5.32762		-0.0391667	79		7.10861
21	59		5.60251		0.870833	73		8.04417
6	70		1.75406		1.50278	79		9.37417
7	75		1.94168		2.98056	85		10.3981
7	75		2.03767		0.0186111	87		8.66667
8	63		2.0944		0.503889	100
8	78		2.13803		2.14167	95		7.3
9	92		2.58745		2.32028	49
11	77		3.08923		0.0169444	90
12	83		3.16341		0.700556	80		7.4
13	87		3.41212		1.66639	86
13	81		3.65646		2.50417	75
17	88		4.53786		-0.143333	66
17	82		4.69494		0.297222	47
18	87		4.75602		0.502222	69		7.57278
19	89		5.092		1.72833	74		7.7
20	81		5.2578		2.58417	55
6	88		1.82823		-0.0544444	70		8.63333
7	94		1.89368		0.501944	63		6.8
8	92		2.17293		1.50194	75		9.53333
9	97		2.43037		2.50667	83		8.55
9	88		2.60054		0.0158333	69		10.1667
12	99		3.2594		0.501667	80		8.81667
12	99		3.3903		1.79861	84		8.5
13	97		3.6521		0.0122222	87
14	84		3.74809		0.886667	80
15	88		3.9968		1.50333	84
17	84		4.52913		-0.05	89		8.94472
17	85		4.57713		0.566389	68		8.51194
18	87		4.77348		-0.0116667	77		7.84861
19	88		5.16617		1.75889	69		8.09139
20	87		5.31016		2.50889	74		8.07306
6	90		1.69733		0.0141667	65		11.2992
7	83		1.87623		1.30028	21		7.01472
8	90		2.12494		1.94306	25		9.01667
9	88		2.41728		0.0183333	67		7.09056
10	84		2.65726		1.42722	68		7.7325
10	91		2.7838		2.77806	75		6.78361
11	83		2.93215		-0.00833333	20		9.33806
12	87		3.35103		1.23889	78		7.31028
14	90		3.77864		2.63972	61		6.68694
17	92		4.5204		0.00138889	72
18	92		4.9131		1.02194	67		8.59222
20	91		5.43234		1.52361	55		7.03861
6	95		1.74533		0.00138889	76		6.59
8	62		2.17293		0.5725	67		6.51611
9	72		2.42164		1.53028	54		6.64972
11	75		2.93652		0.00972222	71		6.46028
11	66		3.1285		0.663889	19
12	59		3.22013		-0.0652778	63		8.05889
13	39		3.5692		0.0427778	66		7.11583
14	50		3.76555		1.59917	16		4.68056
17	90		4.62076		2.12417	21		6.45333
19	88		5.02218		2.49667	25		4.5425
20	61		5.43234		-0.113611	62		7.24
6	85		1.7846		0.504444	58		6.13944
7	98		1.91986		2.50944	32		7.88722
9	90		2.36928		2.90667	51
12	95		3.2245		0.00194444	77		5.73083
12	95		3.28995		0.5025	71		7.00472
13	89		3.62156		1.50333	27		7.42889
15	88		3.93135		2.50972	20
15	82		4.15388		-0.0127778	62		9.05111
17	88		4.56404		0.532778	75		10.9064
18	77		4.79529		1.50389	68		8.73778
18	92		4.94801		2.50306	34		10.4358
6	83		1.70606		0.00222222	33		8.6125
10	87		2.74453		0.544167	66		5.56333
11	89		3.08487		1.50306	35		5.54028
14	71		3.76555		2.50694	42
15	95		3.92699		-0.0136111	67
15	83		4.06662		0.503611	73
15	76		4.17134		1.50278	67
16	83		4.33278		2.5025	96		11.1647
18	75		4.87383		-0.0969444	35		8.89056
20	82		5.31016		0.671667	22		10.3786
6	84		1.76715		1.78083	42		9.91778
7	85		1.8326		-0.0144444	63		8.24444
8	88		2.15112		0.501944	56		9.00861
9	86		2.42164		2.50333	31		6.23667
10	86		2.67035		-0.0458333	29		7.79222
10	89		2.85361		2.87278	17		8.49889
20	82		5.30144		-0.015	69		9.43361
20	75		5.39307		0.507222	35		7.03111
7	67		1.94168		2.14583	71
10	75		2.67908		2.51778	54
10	79		2.80998		-0.0477778	60
11	49		3.07178		0.503611	31
12	96		3.38158		1.50972	38		9.53194
14	96		3.72628		2.50167	19
14	91		3.85718		-0.0538889	73		8.92417
15	85		4.11898		0.503611	45		8.7425
16	56		4.38078		1.78444	82		8.99639
18	76		4.93492		-0.0147222	56		8.83917
19	87		5.08763		0.5175	59
19	97		5.17054		0.00444444	44
20	83		5.45415		0.760833	65
22	86		5.76831		1.80361	65
12	87		3.28558		2.50389	0		8.49806
13	95		3.43394		-0.146667	69		8.09111
14	96		3.74373		0.507222	76		7.78333
15	87		3.94008		1.67611	84		8.22167
16	83		4.32842		2.56361	76		8.07361
17	94		4.45932		-0.0141667	74
18	98		4.72112		1.51222	86		6.61444
19	94		5.07891		0.00222222	69		7.16778
20	92		5.33198		0.574167	82		6.89861
20	89		5.36689		2.13444	80		6.01083
8	96		2.33438		-0.0311111	51		3.065
9	100		2.46964		-0.148056	62		7.56694
10	67		2.72708		1.5125	74		2.48194
11	89		3.06305		0.0025	83		5.17
13	93		3.42957		1.89889	38		7.45639
14	98		3.7001		2.59556	35		5.20306
14	93		3.82663		-0.0155556	59		4.90694
18	93		4.81711		0.660556	82		7.515
19	64		5.07454		0.00138889	63		8.50333
20	40		5.33634		2.07444	76		8.31389
20	98		5.41925		0.927778	58		8.30917
7	95		2.08567		1.55861	59		7.70278
8	98		2.22529		2.75278	67		6.87583
9	97		2.55691		0.0186111	52		8.705
10	96		2.74453		0.547222	63		8.15111
13	95		3.42085		1.50806	85
13	97		3.55611		0.005	55		8.17611
16	96		4.25424		0.517778	54		9.40833
19	95		5.05273		1.66806	63
19	85		5.20981		2.60194	73		7.61889
20	95		5.30144		0.0177778	14		6.64194
20	86		5.34943		0.565556	35		9.01333
20	82		5.36689		2.70028	80		6.83833
21	95		5.50215		0.0730556	19		6.8475
6	88		1.80205		0.518611	62		8.93056
8	99		2.13803		1.51806	36		8.86694
9	80		2.42601		-0.0427778	17		8.25056
10	71		2.61799		0.573333	36		7.94556
10	89		2.79689		1.92667	38		9.25167
12	91		3.27686		-0.0452778	41		7.14
13	96		3.58665		0.456111	49		7.64
18	100		4.82584		1.51556	60		6.45917
18	64		4.9611		-0.0119444	31		10.5536
21	86		5.61996		0.487778	42		8.43778
6	100		1.81951		1.49611	60		9.37861
8	92		2.16421		2.5925	76		9.1075
8	95		2.32129		-0.0783333	87		9.40972
9	95		2.55691		-0.195556	45		6.91222
11	94		2.94088		0.504722	79		9.535
11	91		3.11541		1.66583	72
13	98		3.63901		-0.0625	45		10.75
17	90		4.49422		0.511389	66		11.3667
18	94		4.84329		1.51056	100		11.65
19	96		5.10509		-0.0133333	37		12.7167
20	93		5.36689		0.506111	60		13.4333
6	95		1.76278		1.51444	68		11.4833
7	93		1.94604		-0.110556	21		10.5
8	91		2.21657		1.20528	29		10.8
9	91		2.53509		-0.03	38		10.5667
14	89		3.86154		1.13222	34		11.35
15	90		4.15825		2.91889	29		10.9667
18	98		4.74293		2.92194	36		13.1333
18	86		4.8782		0.0158333	35		11.85
19	84		5.15745		1.57083	33		9.455
20	92		5.40179		0.0113889	33		8.59639
6	96		1.74533		1.55861	38		8.65222
7	99		1.88496		2.50667	34		9.15056
8	94		2.19039		0.00888889	35		9.01167
9	92		2.45655		1.53667	26		8.71944
14	96		3.71755		1.53806	33		8.01083
17	92		4.47241		2.50667	30		7.89389
17	91		4.61203		0.00944444	32		8.25083
18	94		4.87383		0.71	14		8.605
20	93		5.36689		1.5975	38
6	90		1.81078		0.0175	31		8.68083
7	82		1.97222		0.735833	41		8.81556
10	92		2.61799		1.50528	28		8.64056
13	93		3.56047		2.50417	26		8.89472
15	88		4.1757		0.015	24		8.01111
18	78		4.79093		0.513333	40		8.97833
19	93		5.07454		2.50861	17		8.30556
5	82		1.56643		2.51083	31		8.34333
5	79		1.56643		0.00194444	30		8.39028
7	79		1.83696		0.671944	31		8.50583
7	85		1.97659		-0.0213889	28		8.45028
9	93		2.50891		0.595278	59		9.07611
9	93		2.52636		1.95389	64		9.50889
14	94		3.69573		2.67111	51		11.0967
15	91		4.01426		0.0116667	45		8.68917
18	87		4.90874		1.46944	80		8.68278
18	88		4.96546		2.50444	74		8.59889
20	97		5.26653		0.0158333	45		9.92528
20	88		5.36689		1.62278	72		10.585
20	61		5.37125		2.52194	56		7.52528
6	85		1.7846		-0.313333	66		6.58889
7	91		1.93732		-0.3075	56		9.91417
8	85		2.19475		-0.005	29		7.59667
9	94		2.45655		2.18667	50		8.30556
13	76		3.52557		2.18944	57		9.42
14	86		3.66955		2.67444	60
18	92		4.8782		0.00333333	26		9.91667
20	93		5.36689		1.54083	55		10.25
20	92		5.36689		1.54333	51		12.25
7	80		2.01586		2.53667	57		12.5167
8	91		2.13803		0.0147222	10		10.7667
9	93		2.48709		2.64417	35		11.2667
9	92		2.54818		-0.0755556	48		7.18333
11	54		2.94088		0.556389	60		5.85
12	62		3.19395		2.43472	25		11.6167
12	69		3.39903		2.72361	13		12.5333
14	83		3.66519		0.879167	50		10.0333
14	72		3.92263		2.82	49
19	53		5.044		0.0363889	49
21	51		5.53706		0.512778	56
21	54		5.54142		1.57083	68		9.83889
21	76		5.66796		0.005	46		7.79694
8	88		2.35183		0.701667	43		6.41139
12	93		3.3554		1.50361	58		6.15889
13	86		3.52557		0.00666667	32		6.04139
14	76		3.77864		0.5525	55		3.71139
15	68		4.07098		1.56694	90		9.62139
18	94		4.72112		2.75139	84		8.84139
18	88		4.8302		-0.175278	79		7.39
18	73		4.94365		-0.0108333	30		10.4292
19	43		5.2229		1.50361	64
20	46		5.37561		2.54444	86		8.08333
6	80		1.74533		-0.0247222	60
8	91		2.19911		-0.0105556	45
10	97		2.65726		0.917222	56		1.7
13	99		3.46012		1.53583	38		1.05
13	97		3.55175		2.93722	74
14	89		3.68264		1.64333	25
15	91		4.03171		2.50194	31
18	88		4.72984		2.53444	41
18	93		4.88256		2.82278	44
19	58		5.03527		0.00166667	53		6.58333
19	55		5.20544		0.588889	53		6.61667
21	40		5.52397		1.59417	55		8.65
7	80		2.03331		2.55056	54		8.83333
8	90		2.21657		-0.0213889	57		8.86667
10	91		2.63545		-0.0125	43		6.73333
11	77		2.94961		0.847222	45		8.63333
13	94		3.41648		1.63361	45		8.93333
14	62		3.69137		2.70083	52		7.86667
14	48		3.91826		0.00333333	47		9.13333
16	73		4.35896		0.654444	57		8.03333
20	72		5.27962		1.50472	41		9.11667
7	74		1.99404		-0.0597222	31		7.36667
8	82		2.28638		0.506111	52		10.3667
9	68		2.41292		1.51167	69		9.91667
10	52		2.80562		-0.0458333	70		8.7
11	50		2.93652		0.513056	82		8.21667
13	83		3.5212		1.56944	22		8
15	68		3.97935		0.00361111	34		8.83333
15	60		3.98371		0.508889	65		7.8
15	65		4.14079		2.00028	36		7.33333
17	42		4.49422		2.83028	65		7.73333
18	35		4.7822		-0.0305556	75		7.6
19	87		5.06582		1.03694	53		8.13333
19	76		5.21417		2.655	71		10.1
20	51		5.46288		0.00277778	14		7.83333
21	60		5.60687		2.50306	68		7.57028
8	93		2.33438		-0.00138889	42		7.74528
10	88		2.72708		0.00305556	20		8.78333
12	92		3.22013		0.504444	46
17	91		4.46368		1.53361	32		8.8
17	91		4.63385		0.0025	62		6.75
18	80		4.9611		-0.111667	100
19	56		5.1269		0.831667	100		7.06667
20	39		5.48033		1.53694	100		7.03333
21	85		5.6505		2.64583	100		6.93333
21	60		5.65487		-0.0113889	100		8
9	92		2.58745		1.50472	100		8.41667
10	96		2.69217		2.50444	100
11	89		3.0456		0.456944	71		7.21667
12	72		3.26813		1.4575	100		7.25
14	58		3.78736		2.45417	100		8
17	68		4.45495		0.506111	87		7.36667
18	46		4.71239		1.50667	100		6.96667
18	60		4.96983		0.0775	68		6.78333
19	57		5.07454		0.825833	93		7.56667
19	53		5.19235		1.85861	100		8.03333
21	37		5.54142		0.00944444	90		7.28333
6	93		1.71915		2.46528	89		7.06667
9	90		2.38674		0.00805556	32		6.56667
10	76		2.67035		0.00583333	86		7.46667
10	81		2.79253		1.54806	92		7.2
12	79		3.14596		2.59222	91
16	83		4.2237		0.0155556	47		7.21667
17	81		4.57276		0.508611	38		6.43333
17	86		4.70366		1.51083	38		6.93333
18	94		4.90001		2.50972	61		7.05
20	47		5.34507		0.0116667	59		7
20	48		5.49342		0.507778	77		7.75
21	77		5.65923		1.58361	94		7.98333
9	95		2.38674		0.00444444	95		7.35
11	88		2.91034		0.507778	91		7.3
11	93		2.9147		1.50889	91		7.45
11	92		3.0936		0.0144444	61		7.88333
13	91		3.47321		0.508611	71		7.23333
14	69		3.77864		2.25556	91		7.66667
15	64		4.05789		2.90722	92		7.65
17	67		4.62512		0.00361111	86		8.07
18	80		4.75166		1.51222	91		8.78861
18	63		4.88692		2.82222	91		7.12972
19	55		5.05273		-0.0119444	92		7.13306
19	65		5.19235		1.63361	93		7.29944
20	51		5.45415		0.00527778	89		7.22444
21	83		5.63305		0.501944	94		7.48556
8	89		2.33438		1.505	98		8.13111
9	88		2.47837		-0.03	91		9.6475
10	76		2.79253		0.592222	90		7.84583
11	55		3.00197		0.00166667	91		7.05917
13	90		3.62592		1.11306	76		7.16972
17	90		4.54222		2.05583	89		8.76639
18	51		4.73421		2.50222	14		8.50056
19	80		5.16181		-0.0455556	63		8.60139
20	91		5.26217		1.79611	99		9.61611
20	58		5.41925		0.00277778	90		8.615
21	81		5.60687		0.502778	95		9.725
21	26		5.66796		-0.0633333	84		8.51083
8	87		2.29074		0.568333	80		8.20778
9	72		2.50891		0.863611	81		8.08111
10	88		2.74889		0.881111	80		8.28361
10	65		2.75326		0.901667	80		6.1
12	85		3.35976		0.952222	86		6.81083
14	57		3.69137		1.00222	78		7.17389
15	86		4.14079		1.08667	88
16	73		4.3546		1.10472	89		8.50556
17	55		4.57276		1.34194	89		7.76694
19	87		5.07018		1.35083	90
19	51		5.2229		1.535	92		7.17139
20	40		5.34943		-0.0305556	95
21	86		5.60687		0.68	90		7.54389
21	34		5.61123		1.51667	79		7.63444
10	86		2.68781		-0.328611	56		7.92639
14	81		3.87027		0.00277778	80		7.69
15	71		3.96626		0.761111	95		8.80444
17	77		4.51604		1.50222	86		8.49222
18	65		4.75166		2.57611	32		7.12472
18	72		4.93928		2.7675	78		7.23722
19	93		5.10072		2.82806	37		6.81778
20	62		5.37561		2.89944	58		7.50361
21	84		5.62432		2.92306	61		8.11667
21	44		5.63741		-0.0641667	83		8.51056
8	79		2.33001		0.506667	90		7.43111
13	64		3.40339		2.39194	94		7.23528
13	78		3.57356		0.00444444	51		7.31583
14	89		3.80482		0.807222	77		9.11139
15	82		4.0928		1.50472	87
18	69		4.79529		2.50639	87		9.30389
21	85		5.6985		0.506944	88		8.83917
8	76		2.31256		1.50444	70		10.3864
9	90		2.49582		2.50333	68		8.51028
10	94		2.80998		0.00277778	46		8.00889
11	99		3.10669		0.503333	60		8.25944
13	91		3.41212		1.58611	26		9.3325
13	100		3.54302		2.61111	12		9.84722
14	88		3.80918		0.00194444	44		9.55111
15	100		4.07971		0.887222	91
18	80		4.88692		2.27361	65
20	71		5.28835		0.00194444	47		9.5
21	81		5.70723		0.513889	95		9.55
8	79		2.34747		2.23639	83		8.75
10	93		2.74453		2.64306	89
11	96		3.02378		0.0025	52		8.7
14	93		3.76555		1.1025	92		8.08333
19	76		4.97855		1.93889	93		9.16667
19	57		5.10945		-0.00638889	72		9.1
20	60		5.38434		0.0025	48		8.66667
9	88		2.35619		0.504444	91		7.91667
10	94		2.76635		0.6625	100		9.33333
12	100		3.20268		-0.00694444	100		8.5
13	89		3.41648		0.0191667	17		8.05472
14	93		3.82663		2.56417	95		7.67389
18	79		4.83456		0.00222222	93		10.2886
18	63		4.94801		0.0025	65		9.93639
19	69		5.22726		2.82944	14		8.19889
20	64		5.36689		0.00222222	78		10.2608
21	82		5.71159		0.00138889	74		7.83722
8	77		2.13367		0.0522222	65		7.74583
8	83		2.26456		1.84333	84		7.55639
10	70		2.75326		0.00166667	77		7.37389
13	74		3.50811		1.77472	96		9.71889
14	86		3.71755		0.0205556	29		7.64333
15	83		4.03607		1.70639	72		7.58194
18	77		4.90438		2.7625	70		7.59028
19	74		5.08763		0.02	46		8.01472
9	98		2.37801		0.543889	64		9.87583
14	78		3.81354		1.54806	80		11.6031
15	76		4.00553		0.0197222	33		11.0928
16	81		4.37641		0.528889	48		16.7256
20	68		5.31453		1.50333	31		12.5981
21	83		5.72032		2.51778	49
21	64		5.72468		0.00277778	59		13.2606
9	78		2.51764		0.506111	67		6.16278
14	95		3.8659		2.17972	69		16.7606
16	63		4.39823		2.56222	67		10.1833
19	56		5.18363		-0.0308333	23		9.51667
20	50		5.40616		0.501944	59		8.55
8	87		2.21657		1.92472	51		7.45
9	92		2.42164		2.505	59		3.21667
11	96		2.90161		2.80028	59		5.28333
13	89		3.44703		0.0544444	77		3
13	80		3.58665		1.50722	59		5.35
14	80		3.86154		0.00277778	24		9.06667
19	76		5.05709		0.509444	36		6.43333
20	63		5.32762		1.56917	38		5.38333
21	86		5.69414		2.53639	56		9.2
9	89		2.37801		-0.0469444	35		6.16667
9	93		2.522		0.549444	42		7.9
10	97		2.80125		1.97583	61		7.55
13	100		3.40339		2.51167	54		7.43333
13	96		3.64337		0.00277778	50		6.1
15	97		4.0448		0.663611	68		6.18333
16	90		4.24551		2.14139	69		6.15
16	94		4.43314		2.50639	63		6.05
17	80		4.66439		0.0361111	74		7.85
19	72		5.03964		0.616389	65		7.96667
19	66		5.23162		2.53694	64		9.91667
21	69		5.57196		0.00305556	55		8.3
21	97		5.72904		0.5325	61		8.58806
8	80		2.19911		1.81083	40		8.01667
8	98		2.35183		2.59056	38		8.42028
10	100		2.7358		0.00222222	56		8.19417
11	97		3.01942		0.504444	36		8.71417
13	94		3.40776		2.43361	58		7.41528
13	88		3.59974		2.99139	66		7.26861
15	89		3.9619		0.0191667	41		7.68389
19	69		5.05273		1.5075	51		7.63944
20	45		5.26653		2.57806	71		7.26083
20	45		5.49342		-0.0127778	21		8.22306
21	90		5.6985		0.502778	60		8.66944
8	96		2.27765		1.50222	12		8.41444
9	97		2.49582		2.78111	13		8.02139
10	91		2.70962		-0.0463889	49		8.07472
11	92		2.94524		1.00139	44		7.45944
16	81		4.21497		1.53611	52		7.35278
19	59		5.09636		2.66139	7		7.745
20	62		5.24908		-0.0236111	23		7.75111
20	50		5.48906		1.29056	25		7.46167
21	89		5.71595		1.64694	32		8.06056
12	91		3.26377		-0.128889	21		7.77722
13	93		3.4383		1.34583	42
14	92		3.76991		2.645	16
17	88		4.70803		-0.0297222	23		9.61667
18	76		4.86074		0.504167	19		7.33333
19	60		5.10945		1.50556	27		9.5
21	60		5.68541		2.66028	11		9.08333
21	94		5.69414		-0.0225	29		8.55
13	95		3.50375		0.556667	23		9.01667
15	93		4.07098		1.50889	9		8.95
18	73		4.89129		2.50667	7		9.93333
21	51		5.50651		0.00361111	11		9.66667
21	57		5.63741		0.501667	39		10.0833
21	87		5.71595		1.50611	49		9.83333
8	91		2.29511		0.00333333	30
10	84		2.84925		0.504722	48
13	81		3.42521		1.53222	52		6.76639
13	94		3.59538		2.50417	53		8.42111
14	99		3.82227		-0.00111111	49		7.32472
15	91		4.07971		0.600278	45		7.43083
18	84		4.94365		2.13583	48		6.22972
19	87		5.11381		2.51528	47		6.76111
21	82		5.63741		2.26972	50		6.83722
21	65		5.63741		2.5275	48		6.71444
22	86		5.98212		-0.0116667	85		6.665
8	76		2.28202		2.52361	81		7.09194
10	23		2.80998		-0.0944444	95
11	82		2.93652		-0.0130556	87		6.77278
14	75		3.70446		1.83167	91		6.96667
16	37		4.21933		-0.0122222	90		6.95
16	51		4.21933		0.508889	87		6.36667
19	45		5.10072		2.63528	97		7.98333
20	66		5.27089		-0.0305556	97		5.83333
20	67		5.49342		-0.0305556	93		5.56667
9	78		2.522		1.94333	99		7.95
10	70		2.82307		-0.0305556	94		7
12	87		3.21577		1.89111	97		7
12	82		3.21577		-0.0311111	95		6.91667
13	90		3.58229		1.32056	96		7.01667
14	77		3.735		2.50528	97		8.25
15	80		3.97935		-0.0302778	99		8.08333
17	64		4.55967		0.0672222	64		9.02833
18	73		4.80838		0.511667	88		10.1767
18	66		4.93492		1.72861	95		8.95194
19	65		5.14872		2.56667	82		8.46611
20	46		5.41052		0.00555556	71		7.77389
22	78		5.98212		1.54083	82		8.90306
9	79		2.45219		-0.045	93		8.31944
10	73		2.69217		0.535	96		8.73722
10	79		2.85798		2.14167	82		10.2039
12	85		3.24195		0.00333333	74		6.95611
13	81		3.52557		0.519444	92		9.41583
14	92		3.73064		2.85	90
15	89		4.00553		0.00305556	57		9.01667
18	78		4.84765		0.504167	67		9.01667
19	69		5.1749		2.38083	74		6.48333
20	56		5.37125		0.00361111	18		6.71667
21	34		5.51088		0.735278	62		8.76667
22	85		5.97775		1.50583	70		6.58333
23	55		6.05193		2.50556	73		6.71667
9	87		2.39983		0.0025	73		10.7333
9	100		2.52636		0.5075	85		8.51667
11	95		2.95397		1.50556	77
12	90		3.22886		2.51194	69		8.56833
13	97		3.42521		0.00305556	82		10.3131
13	77		3.57356		0.754444	75		9.85639
17	86		4.70803		0.897778	77		9.50389
18	83		4.90438		1.93417	90		7.80333
19	74		5.07891		0.502222	82		7.80972
20	73		5.40616		0.00305556	69		7.74028
22	61		5.79886		0.639167	65		7.75528
22	61		5.93848		1.50778	88		9.36389
9	49		2.52636		2.75528	60		9.0175
10	72		2.87107		0.00527778	67		9.67806
12	89		3.25504		0.5075	86
15	75		4.08407		1.85556	63		8.59556
16	82		4.42441		0.00388889	84		10.3036
19	67		5.23162		1.72278	31		9.92639
22	64		5.76831		2.67083	63		7.55778
22	53		5.89921		0.00555556	87		8.1775
23	30		6.16101		0.820833	76		7.98222
23	78		6.16538		1.75889	81		7.87111
10	90		2.65726		2.62083	74		7.85944
10	80		2.83616		2.71028	83		9.63972
11	86		3.08487		-0.00833333	93		9.59806
12	75		3.3074		0.521944	89		8.10556
14	72		3.735		2.795	99		8.11194
17	79		4.54658		0.00444444	75		8.35333
19	84		4.98728		0.502778	85		8.76611
19	79		5.13999		1.50389	79		11.1431
20	64		5.31016		2.50417	77		10.6383
21	47		5.56324		1.50944	88		7.54611
23	74		6.05193		-0.0936111	90		10.3161
7	66		1.96786		0.4075	92		10.2364
7	47		2.08131		1.73889	85		8.50333
8	69		2.13803		0.0155556	49		9.07778
9	74		2.45655		0.531389	61		8.17361
10	55		2.68344		2.50528	41
12	87		3.26377		0.00194444	52
14	79		3.73064		0.503333	55		10.3267
17	69		4.45059		1.50333	63		10.0106
17	65		4.59458		0.00138889	40		9.50694
18	84		4.8782		1.75444	60		10.5636
19	79		5.07454		2.50389	68		9.34222
20	64		5.24908		0.00111111	54		9.29139
21	52		5.51088		0.541944	65		7.83056
9	70		2.3911		1.50306	74		8.94722
9	63		2.53945		0.00111111	56
10	75		2.80125		0.502222	74		9.55139
11	83		3.06305		0.00138889	47		10.5386
12	75		3.2245		0.5025	68		9.96722
12	79		3.35976		0.00222222	68		9.36667
14	73		3.84409		0.502778	79		8.58333
16	84		4.33714		0.00388889	54		8.71667
18	82		4.80402		0.502778	70		8.96667
19	71		5.20544		2.54972	56		8.81667
20	73		5.3887		-0.00111111	55		9.75
21	62		5.58069		0.676389	60		9.01667
22	47		5.97775		2.72083	51		9
8	69		2.24711		-0.0177778	58
9	80		2.37801		2.505	63
10	84		2.71399		-0.0316667	54		7.25
12	92		3.18959		1.54	43		9.38722
15	88		4.18006		0.0152778	71		11.035
21	63		5.56324		0.618056	77		7.26556
22	34		5.81631		1.50472	59		7.64278
22	86		5.98212		2.51389	63		7.8925
9	87		2.474		0.0191667	80		7.11028
10	80		2.70526		0.505833	74		8.61972
10	84		2.8667		2.32306	96		7.47722
12	80		3.39467		2.77472	67		8.01111
13	83		3.64774		-0.0286111	76		8.09778
14	73		3.91826		1.63611	61		8.11556
18	80		4.88692		0.00722222	59		8.02806
19	80		5.03091		1.50361	72		8.00194
20	72		5.3058		2.63083	54		8.02083
22	74		5.77268		-0.0161111	89		8.02083
23	74		6.16101		0.505278	60		8.04167
23	47		6.16974		1.50556	67		8.03556
16	81		4.4375		2.51139	69		8.00611
19	77		4.98728		-0.0386111	81		8.03472
19	68		5.08763		0.627222	82
20	75		5.39307		1.50222	68
22	75		5.80322		2.53	89		7.65194
9	22		2.41292		-0.0686111	82		7.97861
9	29		2.54382		0.506944	84		4.87917
10	53		2.80562		1.77194	98		7.5575
11	51		3.07178		2.505	84		7.3025
13	49		3.46884		-0.035	39		6.94639
14	56		3.9139		1.33278	71		7.42389
15	59		4.04916		2.50333	70		7.00889
15	64		4.12334		-0.00416667	76		9.98861
16	52		4.18879		0.630833	98		9.14472
16	60		4.40259		1.56667	93		6.84472
17	57		4.58149		2.50361	89		7.43833
18	55		4.89565		-0.0219444	68
19	69		5.03091		0.745278	76		8.17083
19	59		5.22726		1.54833	83		8.70917
20	42		5.44543		-0.00916667	62		8.9875
20	54		5.44543		1.50222	67		9.02583
21	39		5.50215		-0.0602778	64		8.69778
8	89		2.3431		-0.0230556	76		8.84556
9	68		2.50018		0.505278	71
13	66		3.40339		0.00361111	73		8.98417
13	75		3.59974		2.46389	72		8.40806
14	74		3.80482		-0.01	75		8.92778
15	51		4.06662		0.524167	88
16	38		4.3895		1.52	83
17	28		4.54658		0.00361111	88		8.32028
18	53		4.81275		1.56806	85		8.92333
19	35		5.03527		0.00388889	85		7.78167
20	53		5.25344		1.50722	60
20	53		5.37125		-0.0283333	77		9.00111
20	58		5.37125		2.02972	74		9.45167
9	77		2.4391		0.00416667	82		7.96694
11	69		2.90161		0.502778	88		7.85028
11	74		3.09796		2.46611	80
13	76		3.47321		2.50472	80
14	68		3.90081		-0.0780556	80
16	74		4.29787		0.5075	82		9.85
17	75		4.5684		1.81222	87		9.03333
18	72		4.75166		2.52694	77		9.13333
20	79		5.36689		0.00472222	78		8.95
20	82		5.36689		0.535556	100		8.88333
20	86		5.37125		1.58028	79		7.5
21	52		5.52833		2.51222	73		7.38333
6	65		1.78896		-0.0463889	54		7.98333
8	21		2.1293		0.5175	56		7.58333
8	25		2.29511		1.50694	78
10	15		2.66599		2.59222	74		8.95
10	68		2.86234		0.00555556	81		9.26667
12	68		3.28558		1.66056	80		8.21667
13	74		3.50375		2.50833	83
14	71		3.69137		-0.0302778	42		7.6
14	24		3.92263		0.506944	56
18	73		4.80402		1.85444	51		10.2333
19	22		5.09636		2.50556	43		10.0167
20	26		5.29271		-0.0133333	53		8.49333
20	37		5.36689		0.505833	55		7.78833
9	67		2.40419		1.50528	65		7.97194
10	68		2.77071		2.51472	65		6.87111
11	75		3.12414		-0.0605556	59		8.02556
13	54		3.54302		0.509444	61		9.74639
14	70		3.70882		1.50417	58		8.345
16	54		4.39387		2.51528	60		8.40278
17	38		4.60331		-0.0130556	70		8.52694
20	43		5.36689		0.528611	71		8.46944
6	20		1.78024		1.50556	62		8.22722
8	78		2.10749		2.505	78
9	61		2.474		-0.0472222	59		11.1392
13	71		3.52993		0.0075	54
14	79		3.80918		0.512778	55		7.76333
17	79		4.59458		1.51056	62		8.51278
19	72		5.10072		2.50861	48		8.34111
20	76		5.47597		0.00194444	50		8.32694
10	72		2.64417		1.23417	60		8.26194
11	67		2.91034		-0.0133333	67		7.51194
11	55		3.04124		2.89556	62
17	33		4.45059		-0.03	35		9.095
21	58		5.65487		-0.0302778	60		7.84778
8	76		2.30383		-0.1625	65		7.41778
9	67		2.45219		2.54056	54		8.18333
10	54		2.7009		-0.0641667	60		8
13	55		3.5212		0.5925	56		8.28333
14	62		3.70446		-0.0436111	83		8.31667
15	57		3.95317		0.563889	78		8.75
17	76		4.50295		1.50444	80		9.8
19	64		5.00909		2.63944	79		8.11667
19	51		5.18799		-0.0136111	74		8.1
20	77		5.40616		0.575833	79		8.08333
21	30		5.58942		2.46778	55		8.15
9	73		2.50018		2.50806	52		8.1
11	62		3.04996		-0.0588889	71		8.15806
12	69		3.24631		0.523611	76		8.65278
15	56		4.02298		1.95667	74		8.60944
20	70		5.31889		2.87694	87		8.97528
20	60		5.42361		-0.0133333	60		9.33667
20	17		5.47597		0.509167	49		8.53917
9	71		2.56127		1.50583	41		8.50944
10	19		2.73144		2.50611	41		8.69083
13	68		3.53429		-0.180833	58		8.48861
18	70		4.77348		0.5125	53		8.53694
19	27		5.14872		2.26111	58		8.81472
22	38		5.82504		2.82111	72
10	63		2.7009		-0.0130556	73		9.38333
14	75		3.76118		0.639722	68		9.68333
18	69		4.72984		2.10028	72		9.43333
21	67		5.66359		2.59556	80		8.13333
11	66		2.89725		2.91694	79		8.03333
12	16		3.30304		0.00222222	74		5.66667
13	21		3.44266		0.7175	71		8.76667
13	25		3.53866		1.50444	70		4.3
17	20		4.59458		0.00277778	78		8.11667
19	65		4.98292		1.54222	74		9.61667
20	28		5.46724		2.85889	74		7.96667
20	24		5.47161		-0.0308333	62
7	62		1.85441		0.630556	65		9.04694
7	58		2.01586		2.1675	74		8.76472
9	32		2.53945		0.00194444	75		8.16417
10	51		2.64417		0.559167	74		8.5725
11	64		2.91034		1.68528	72		8.93889
11	65		3.06305		-0.0127778	50		7.035
12	37		3.32485		2.26472	68		7.00472
13	12		3.64337		0.00333333	58		8.41639
20	59		5.37561		0.504722	66		8.53444
21	32		5.53706		1.50833	73		8.55056
21	71		5.68541		-0.0175	61		8
9	77		2.44346		0.540278	81		7.8
9	71		2.57436		0.0113889	90		6.38333
10	27		2.83616		0.511111	99		7.36667
11	20		3.10232		1.51	97		7.98333
13	64		3.48193		2.50722	100		7.9
13	58		3.62156		0.0169444	73		7.51667
14	56		3.88336		1.54333	86		6.9
15	76		4.14516		0.0133333	78
16	83		4.28478		1.50806	88		7.25
16	65		4.33278		2.50361	100		7.93333
17	64		4.64258		0.015	100		7.8
17	66		4.65567		1.81167	70		8.28333
18	79		4.91747		0.0191667	55		8.26833
19	87		5.07454		0.507778	70		8.17694
20	36		5.32762		1.5075	69		8.38056
21	42		5.50651		2.62639	96		7.95611
8	62		2.21657		0.0169444	61		9.21306
9	75		2.35619		0.506667	80		6.73278
9	68		2.61363		1.5125	53		6.65278
10	34		2.87543		2.51806	71		6.66389
12	69		3.19832		1.30639	37		6.81139
12	73		3.33794		1.51	55		6.84528
13	86		3.59974		2.50389	86		7.32528
19	85		5.00037		-0.0113889	72		7.50694
19	44		5.13127		0.516944	100
20	18		5.39307		1.54194	100		9.06056
21	59		5.49779		2.50306	100		9.15917
7	33		1.92859		-0.00583333	84		8.95722
7	66		2.07258		0.596667	87		9.24167
8	35		2.32129		0.00805556	85		8.83167
9	42		2.58309		0.536667	89		9.00944
13	73		3.59974		-0.0113889	79		9.20611
14	86		3.735		0.603611	66		9.025
15	80		3.9968		1.63583	43		8.84806
19	83		5.10945		2.54083	53		9.14306
20	87		5.38434		-0.175833	57		9.66806
21	79		5.49779		0.0025	49
8	67		2.10312		1.50639	26		7.48333
8	73		2.23838		2.50472	40		7.5
9	67		2.50018		-0.315556	53		7.5
10	96		2.76198		0.00361111	60		6.66667
12	64		3.33358		2.0525	65		6.5
13	88		3.50375		0.513889	32		7.58333
14	24		3.76991		1.54167	42		7.3
17	72		4.6513		2.7775	47		8.2
19	64		5.13563		0.00444444	48		7.55
20	84		5.35816		0.700278	55		7.73333
21	71		5.49779		1.76028	82		6.63333
8	35		2.20784		2.53667	67		9.73333
9	22		2.41292		1.19278	47		9.65
10	42		2.7009		0.00361111	77		9.46667
11	14		3.0456		0.5075	46		10.1667
12	31		3.39903		1.50667	67		9.31667
13	66		3.49066		2.58333	75		8.58333
13	34		3.62156		0.00222222	69
14	66		3.88336		0.520833	63		9
20	30		5.46724		2.28222	60		8.43333
21	57		5.5676		2.56694	70		10.7
21	70		5.64614		0.521667	65		9.86667
22	89		5.89485		1.87028	61		7.58333
6	63		1.80205		0.607778	100		7.68333
7	56		1.93732		1.76528	100
9	31		2.46091		0.00222222	100		8.03333
11	73		2.94088		0.504167	100		8.35
13	41		3.41648		-0.0352778	100		8.36667
13	65		3.5692		0.861944	100		8.01667
14	84		3.89645		0.517222	33		7.71667
23	73		6.0432		1.72833	78		8.61667
6	29		1.81078		2.9975	51		8.2
9	17		2.57436		-0.04	73		8.23333
11	35		2.90161		0.873611	69		8.23333
11	60		3.04124		2.65444	56		8.2
13	71		3.47321		0.00361111	57		8.21667
17	61		4.64258		1.50306	81		7.18333
18	71		4.80402		2.95194	80		10.1333
19	31		5.06145		-0.00166667	10		8.17194
21	62		5.63741		1.74944	30		8.29972
7	69		1.9155		2.50583	77		5.50333
7	35		2.05076		-0.0105556	10		8.17278
9	71		2.48273		0.790556	60		8.92306
9	54		2.57872		1.50139	57		8.50361
12	68		3.29867		2.50194	67		8.25194
14	82		3.69137		0.00861111	50		8.23944
15	82		3.99244		0.535	68		8.39667
17	77		4.6164		1.8975	69		8.14583
18	43		4.8782		2.70528	67		8.17361
19	35		5.02655		0.00361111	37		8.40778
22	82		5.95594		0.7025	65		8.67639
9	60		2.43037		1.5375	81		8.59389
9	31		2.57436		2.52472	20		8.3
10	38		2.84052		0.01	30		8.69806
11	19		3.09796		0.615278	71		7.64111
13	17		3.40339		1.50361	74		8.64833
14	18		3.72628		2.50306	41		8.65139
18	43		4.81275		-0.00611111	19		8.60806
18	54		4.81275		0.535833	73		8.85583
19	64		5.03964		1.5325	86		8.8625
19	76		5.1749		2.1575	68		8.77917
20	38		5.4367		2.53056	79
21	56		5.68541		0.0111111	73		8.83333
6	62		1.73224		0.586667	77		9
9	68		2.38674		1.53972	91		9
9	71		2.55254		0.000277778	21
13	70		3.65646		0.501667	52		10.7167
14	72		3.71319		1.50722	45		10.6167
19	84		5.12254		2.5025	20		7.78333
20	66		5.26217		-0.0572222	80		9.28333
21	90		5.49779		0.504722	82		8.75
21	83		5.49779		1.73028	79
21	83		5.49779		0.501944	86		9.66667
22	87		5.9603		2.00389	89		9.08333
6	73		1.77151		0.0247222	44		9.18333
7	45		1.91986		0.778611	50		8.92778
8	82		2.25584		1.67861	72		8.92444
15	81		4.15388		2.89111	62		8.92833
20	85		5.44979		0.0169444	30		8.93194
21	86		5.59378		1.40528	64		8.91722
21	90		5.65923		2.94778	71		8.05528
22	71		5.84249		2.94861	71		8.06944
6	56		1.68861		-0.0172222	32		8.78417
6	59		1.82823		1.95056	76		8.93306
11	81		3.00633		0.00333333	62		8.66444
12	39		3.34667		1.86194	72		9.33194
14	77		3.67392		2.70972	75		8.97111
20	83		5.46288		-0.0883333	33		9.05806
21	73		5.49779		0.873889	20
22	65		5.87303		1.54083	62		9.15833
7	44		1.85441		2.50222	64		8.62667
7	65		2.05076		0.0172222	38		9.40278
8	65		2.32565		0.501389	34		8.56083
9	0		2.50891		2.74778	61		9.07778
11	65		3.03687		0.00222222	42		7.84306
12	52		3.29431		1.17111	47		7.91972
13	80		3.55611		1.50528	28		9.34333
22	13		5.9603		2.65528	39
9	69		2.42601		-0.0111111	44		7.41667
9	76		2.59618		1.08639	70		7.91667
11	84		2.90161		1.54889	49		7.5
11	76		3.13287		2.50278	58		8.75
13	79		3.47757		0.0130556	65		8.06667
15	80		3.94881		1.21889	69		6.58333
15	93		4.17134		1.92917	62		6.58333
17	79		4.60331		2.66694	68		7.7
18	93		4.89129		0.00277778	49		7.63333
19	92		5.01782		-0.00722222	27		8.16667
20	78		5.30144		0.777778	40		7.75
22	83		5.89049		1.50806	42		6
9	74		2.38237		2.56111	62		7.55
10	86		2.77944		1.51389	62		7.33333
13	85		3.40339		-0.229444	43		7.26667
14	82		3.67392		0.766944	54		7.5
15	90		4.02298		0.0233333	81		8.73333
16	77		4.20188		0.506389	62		6.36667
16	86		4.33714		2.52833	63		6.65
17	35		4.59894		0.0025	70		6.41667
22	85		5.89049		1.87972	73		5.91667
7	69		1.96786		0.0163889	46		6.3
8	82		2.11621		1.93361	83		7
9	80		2.52636		2.62583	79		6.25
12	53		3.29867		0.0236111	59		6.25
13	84		3.47321		2.79694	75		6.31667
14	68		3.70882		0.0566667	65		7.7
19	88		5.19672		0.951111	69		7.25
22	80		5.79449		0.00722222	62		6.5
23	87		6.08684		1.42222	68		6.48333
7	51		1.92423		1.97694	75		7.45
13	76		3.51684		2.50833	78		7.03333
19	62		4.98728		0.00388889	67		7
19	56		4.996		0.775	73		7.06667
20	76		5.24471		1.51389	73		7
21	81		5.57196		2.14861	59		7.08333
21	45		5.75522		2.59611	67		7.01667
22	55		5.89049		-0.0372222	75		8.63333
22	40		5.96903		0.539444	70
7	62		1.90241		1.74778	67		7.68889
8	74		2.33438		-0.0216667	64		7.54472
12	65		3.32922		0.578333	74		7.09111
13	79		3.50811		1.50861	78		7.10194
15	81		3.9968		0.784722	76		8.18083
18	73		4.90001		2.55083	80		9.00028
19	82		5.07018		0.0294444	71		7.19333
21	78		5.5196		0.884722	66		7.08972
22	65		5.89049		1.6225	67		7.08278
8	83		2.14239		2.64056	62		6.74472
10	38		2.63545		0.145278	48		7.18167
10	35		2.81871		0.599167	44		9.45694
12	88		3.36412		1.64611	50		8.82944
14	79		3.71319		2.63556	38		8.4
7	59		1.93295		-0.00583333	32		8.56667
8	82		2.11185		1.3625	66		10.0833
20	79		5.27962		1.51333	53		10.1667
20	89		5.41488		2.14806	67		8.66667
22	73		5.89049		-0.00694444	67		8.21667
22	83		5.89049		0.0941667	61		6.76667
7	63		2.07694		0.547222	38		8.23333
10	76		2.61799		2.05417	63		9.75
18	73		4.86511		0.0872222	57		9.18333
23	81		6.07375		0.637778	27		10.6333
7	58		2.07258		2.13139	27		8.88333
8	59		2.23838		2.50889	38		8.01667
9	67		2.55254		0.00527778	60		9.38333
10	80		2.76198		0.608889	45		8
12	68		3.31176		0.0886111	22		9.33333
13	58		3.4383		1.04833	33		9.41667
14	63		3.90954		0	73		9.5
20	42		5.36689		1.23611	24		9.64694
21	25		5.62869		1.50278	24		9.02333
8	52		2.22093		2.89417	41		9.9775
9	63		2.36056		0.005	47		9.01111
9	85		2.60927		1.69667	50		8.375
12	86		3.27686		1.69778	53		9.75833
13	87		3.42957		2.56389	56		9.78222
14	68		3.69137		-0.0358333	50		9.67
20	32		5.31889		0.502778	33		8.79417
21	14		5.55887		2.43583	43		7.69222
8	55		2.31256		2.64472	49		9.20222
9	54		2.44346		-0.0330556	75		9.50056
10	63		2.74453		0.870556	49		10.73
11	73		2.98888		2.135	59		7.25
13	85		3.42521		-0.00916667	86		7.16667
14	67		3.86154		0.6325	80		7.16667
20	41		5.3058		2.74444	21		7.2
21	13		5.5676		2.74639	16		9.58333
7	14		1.84569		0.00555556	82		7.11667
7	35		1.98968		0.522778	52		5.96667
9	80		2.54818		1.53222	78		5.96667
13	64		3.46448		2.56139	66		8.16667
14	67		3.72628		-0.00388889	42		8.3
19	56		5.06145		1.76833	49
20	36		5.24471		2.36694	70		8.58333
21	14		5.50215		2.63306	62		9
7	19		1.84132		0.0116667	75		9.43333
7	62		1.95913		0.95	59		8.03333
8	36		2.22093		2.7625	78		7.81667
10	67		2.78816		-0.00805556	55		7.01667
13	71		3.46012		0.747222	38		4.31667
13	58		3.59538		1.64639	36		8.5
14	62		3.9139		2.51611	47		7.45
19	23		5.07454		2.95667	64		8.63333
19	18		5.18363		0.00833333	69		8.46667
20	15		5.34507		0.8075	80		7.38333
21	10		5.54142		1.34889	84		9.58333
6	17		1.72788		2.05722	83
7	36		1.88932		0.00833333	70		8.16667
8	38		2.24275		0.503889	34		8.25
9	50		2.57		1.88222	37		8.26667
12	67		3.34667		2.5125	53		8.35
13	62		3.49502		2.98556	57		8.33333
14	59		3.81354		-0.0877778	37
19	39		5.20544		1.8725	18
20	11		5.39307		1.875	19		8.33333
21	10		5.6505		2.61556	46		8.25
8	41		2.13803		0.00916667	44		8.25
8	49		2.26893		1.275	64		8.33333
9	60		2.54818		2.99417	84
12	70		3.37721		2.99528	75		9.7
14	72		3.69573		0.00722222	51		8.17583
14	80		3.86154		0.92	42		8.04917
15	100		4.10589		2.62056	18		8.51306
20	31		5.44106		2.62139	22		8.88778
21	8		5.68541		0.0144444	69		9.22833
7	31		1.91986		0.599722	50		9.01278
7	42		2.05076		1.60889	67		8.91778
8	60		2.31256		2.96917	82		7.94639
9	76		2.60054		-0.005	75		9.09194
12	92		3.31613		2.14167	90		8.17028
13	59		3.44266		1.56639	86		8.75028
13	73		3.59538		0.364722	41		10
14	86		3.84409		0.506944	62		9.20583
19	62		5.20544		1.50389	66		7.09722
20	28		5.32762		2.55056	71		6.76139
21	16		5.58942		0.00611111	40		6.42361
9	87		2.44346		0.517222	59		6.75806
14	57		3.8659		1.61194	46		7.76278
15	47		4.02298		2.60528	27		5.93722
16	29		4.21061		-0.163333	70		6.30667
16	25		4.42877		0.00416667	50		6.67278
20	27		5.34071		0.523889	58		6.75528
20	17		5.48906		1.98083	72		6.9575
21	11		5.75086		2.51333	67		6.66667
9	45		2.40419		0.00305556	38		8.49778
9	79		2.59181		0.531667	64		7.76722
11	72		2.89288		-0.287778	54		9.66667
13	99		3.42957		0.0025	48		8.75
14	55		3.68701		0.558889	66		6.58333
15	77		3.94881		0.00305556	43		8
19	46		5.01346		0.638889	36		7.25
19	36		5.20108		2.06028	38		8.33333
20	22		5.45852		0.00416667	21		6.8
9	45		2.48709		0.785	62		7.8
10	66		2.63545		2.20083	30		8.2
11	100		2.89725		2.75861	29		9.26056
12	91		3.34667		0.00555556	40		8.03333
13	96		3.55175		0.519444	57		9.63694
14	62		3.73937		1.67972	53		7.95528
20	51		5.32762		0.00222222	45		9.55194
21	44		5.58942		0.750833	56
22	73		5.75959		0.00388889	32		7.41917
7	37		1.95913		0.756111	58		6.92417
8	60		2.0944		2.47361	62		7.52639
9	68		2.36056		2.87917	47		7.42222
14	98		3.7001		0.0025	50		9.21306
19	63		5.17054		0.674722	47		9.7475
20	31		5.39743		1.9	40		9.8075
21	11		5.60251		0.00222222	56		7.3375
22	86		5.75959		0.674167	68		8.44667
10	21		2.77071		-0.0975	82		8.7225
11	29		3.11541		0.628056	90		8.61389
14	32		3.70446		1.85389	45		8.75833
14	30		3.70446		2.60667	29		8.39444
15	31		3.9619		0.00222222	49		9.24417
15	17		4.10589		0.504167	74
16	15		4.36332		1.51139	80		7.50083
18	29		4.77348		2.79306	55		7.79917
18	40		4.8782		0.00305556	72		7.56667
19	32		5.20981		0.525	75
8	38		2.23838		1.62639	73		8
9	34		2.53945		2.88	82		8.01667
11	29		3.01069		0.00166667	77		8.03333
11	36		3.01069		0.505833	75		8.83333
12	15		3.32049		2.65778	77		7.25
13	15		3.46448		0.00194444	68		8.2
14	29		3.79173		0.832778	62		7.18333
15	31		4.14952		0.00277778	74		7.73333
16	39		4.28478		2.18361	75		7.58333
16	36		4.43314		2.54306	74		9.58333
18	37		4.7473		0.104444	62		7.9
21	25		5.51524		0.584722	73		9.28333
22	53		5.79013		0.00194444	37		8.4
22	70		5.92103		-0.162778	36		10.5833
9	35		2.3911		-0.284722	33		9.28333
10	33		2.80125		0.00166667	34		8.98333
15	36		4.06662		2.33556	72		7.33333
17	28		4.55531		2.55028	76		8.01667
17	34		4.58149		1.3575	47
19	33		5.07018		1.58833	52
19	32		5.07018		0.698333	35		12.85
20	53		5.2578		-0.1625	23		9.33333
21	38		5.51524		2.11222	61		9.91667
21	49		5.70286		2.82167	57		10.8833
9	33		2.53945		0.1525	32		8.93333
11	38		2.94524		0.713056	49		8.1
12	34		3.19395		1.50333	67		8.76667
13	32		3.49939		0.0111111	32		9.93333
17	30		4.47241		0.755556	65		8.9
17	22		4.65567		1.8625	63
18	38		4.74293		0.0233333	13
18	68		4.81711		0.741111	71		10.2206
20	52		5.37125		2.92861	57
22	25		5.80322		0.00277778	80		9.4025
7	35		1.91986		2.56889	73		8.43194
8	26		2.32129		-0.00833333	72		9.15417
8	33		2.32129		0.504444	82
9	30		2.57436		1.51	63		9.16056
13	38		3.59101		2.6675	51
18	28		4.95674		0.00611111	74
19	37		5.04836		0.501944	72		8.2575
20	40		5.39743		2.01556	79
7	32		1.92859		-0.0213889	75		6.48333
8	14		2.11185		0.537778	72		7.16667
8	38		2.3431		1.50528	70		7.33333
11	37		3.00197		2.50278	86		6.6
12	31		3.27686		-0.165556	65		4.96667
16	26		4.24551		-0.157778	67		6.36667
18	34		4.87383		-0.100833	69		6.58333
19	33		5.07018		-0.0361111	71		6.3
20	40		5.34507		0.884722	76
22	24		5.85994		1.58139	70		5.78333
7	31		1.89368		2.50333	31		6.46667
7	41		2.08131		-0.0294444	30		6.66667
8	28		2.28202		0.180833	43		6.73333
9	26		2.54382		-0.0472222	50
13	47		3.46012		0.506111	78		8.23333
19	49		4.996		1.50222	80		7.01667
20	48		5.3058		2.50278	90		7.05
21	47		5.52833		-0.0144444	69		8.03333
22	45		5.92976		0.538611	65		10.1833
8	24		2.27329		1.61167	59		7.01667
9	40		2.40419		0.926111	73		6.55
11	17		2.92779		2.51111	37		7.41667
11	31		2.92779		2.85056	56		7.85
12	29		3.26813		-0.103333	68		8.85
14	21		3.72191		0.935	76
14	29		3.72191		1.72306	92		7.05
16	38		4.32842		-0.0311111	60		7.03333
19	42		5.13127		0.173333	65		6.85
20	41		5.27089		1.50361	88
20	36		5.42361		-0.0941667	77		7.3
23	46		6.13047		1.25722	74		6.93333
7	30		1.86314		1.64222	96		6.93333
7	31		2.03767		2.52611	74		6.91667
10	33		2.73144		-0.0280556	78		6.95
13	33		3.45139		1.46639	83		6.88333
19	31		5.00473		2.50528	80		7.98333
20	50		5.26653		0.556389	78		8.66667
21	39		5.59378		1.9425	75		9.5
9	28		2.56563		2.79944	77		8.78333
10	59		2.72708		-0.0141667	69		9.8
11	64		3.08487		2.6125	60		7.73333
12	51		3.27249		2.995	36		7
13	48		3.62156		-0.03	70		7.85
14	59		3.76991		1.47528	77		6.83333
15	68		4.01862		1.5175	66		7.7
16	66		4.21497		-0.0136111	63		8.5
16	53		4.29351		0.506944	61		8.31667
16	54		4.38078		1.50556	54		6.83333
18	49		4.76039		2.50611	34		7.03333
18	41		4.92183		0.504722	69		7.00722
20	52		5.28398		1.50417	50		9.41667
21	52		5.53706		2.50417	59
22	26		5.79886		0.0025	72		9.2
8	45		2.12058		0.505	58		9.43333
9	80		2.50455		1.66333	77		9.08333
10	74		2.77507		2.50556	60		9.08333
12	50		3.18523		0.00277778	68		9.05
12	74		3.33794		0.505	51		9.06667
13	64		3.57792		1.50472	42		9.08333
15	67		3.95753		2.50528	71		9.1
16	61		4.25424		-0.0655556	79		9.06667
16	70		4.39387		1.14889	78
18	44		4.71675		1.86556	84		8
18	40		4.88256		2.50389	69
21	68		5.58505		-0.0408333	68		8.03333
22	35		5.83813		0.505278	73		8
23	56		6.09556		1.5075	75		8.18333
23	46		6.2221		2.5075	84		8
23	61		6.23519		-0.0141667	78		8
10	45		2.81434		1.71611	92		8
12	72		3.23759		0.00972222	84		8
13	56		3.47321		1.68556	87		8.06667
14	51		3.71755		2.59278	74		8.03333
15	67		3.97499		-0.00361111	72		8.04111
17	62		4.52477		0.508611	54		7.96667
18	75		4.84329		1.50694	52		9.68
19	68		5.07454		2.50583	41		6.47167
19	79		5.17926		-0.0586111	73		10.0078
20	61		5.35816		0.844167	36		10.9675
21	62		5.61123		1.67333	39		8.78278
22	66		5.83376		2.50389	67		7.43222
23	59		6.22646		-0.00222222	63		8.21556
11	23		2.94524		0.505278	35		4.62806
13	63		3.44266		1.52778	73		6.31444
13	49		3.63465		-0.0188889	73		6.68028
18	51		4.76911		0.505278	45		6.37417
19	55		5.09636		1.60278	33		9.78917
7	66		1.94168		2.63694	49
7	56		1.94168		0.00777778	67
7	29		2.02022		0.506667	49		8.68528
9	50		2.59618		1.70139	52		8.68222
9	57		2.59618		2.50611	69		7.75
10	60		2.72271		0.0180556	72		8.68083
11	63		2.87979		0.796111	78		9.0125
11	82		3.03251		1.52389	68		8.39167
12	68		3.27686		2.50528	51		7.22528
13	54		3.49066		-0.0394444	68		6.66944
13	58		3.65646		0.516667	69		8.18028
15	65		3.98371		1.50333	69		9.93417
15	51		4.14079		-0.0594444	54		9.3725
16	65		4.27169		0.508611	69		7.88528
17	68		4.49859		1.52889	67		9.74222
20	68		5.24908		0.0377778	51		7.62722
21	54		5.55887		2.55111	39		8.76028
22	13		5.83813		-0.0286111	57		8.42361
2	15		0.650135		1.42417	61
2	54		0.650135		1.53667	65		8.62028
7	26		1.96786		2.51667	57		10.7603
9	55		2.36928		-0.0122222	55		8.34889
9	51		2.36928		0.584167	52		8.13111
10	57		2.63108		1.91694	51		8.46694
10	68		2.78816		0.0261111	48
11	75		2.92779		0.505278	57		12.2167
15	74		3.95753		1.50778	58		9.22972
15	73		4.04044		-0.0608333	58		5.47333
20	53		5.36689		2.41806	64
21	70		5.54142		2.56583	49		10.8756
21	34		5.63741		-0.0125	43
23	55		6.15229		0.527778	62
7	18		1.87623		1.50917	41
10	49		2.8318		2.59472	12
11	52		3.01069		-0.0777778	47		8.46722
13	58		3.40776		1.1875	54		9.3675
13	67		3.40776		-0.0275	59		8.26056
14	51		3.79609		2.32389	58		7.98944
15	34		4.16697		2.8975	52		7.76167
16	67		4.30224		0.00416667	14		9.71444
17	60		4.4855		0.513889	63		9.35417
20	48		5.37998		1.75889	70
21	27		5.52833		0.00361111	11		9.08139
21	24		5.68105		0.00444444	41		8.64944
22	24		5.92539		1.56972	86		8.50194
7	10		2.07258		2.7275	56		8.46944
10	35		2.76198		-0.0025	29		8.5025
11	44		2.99324		0.505833	24		8.39167
12	62		3.25504		2.50611	24		9.35639
12	66		3.38594		-0.00166667	19		8.665
13	53		3.55175		1.50583	80		6.56222
16	59		4.30224		2.6825	80		8.8825
19	42		5.2229		0.00194444	15		8.63333
20	30		5.37561		0.00166667	71		8.67167
21	9		5.66359		1.46	27		9.25472
23	43		6.23955		2.20472	54		9.19917
9	48		2.48709		-0.0136111	70
10	60		2.6529		1.5025	65		9.38333
12	25		3.14596		2.50222	72		8.03333
12	13		3.22013		1.33611	72		6.73333
14	50		3.75682		1.83472	69		7.66667
18	57		4.96546		-0.0391667	66		7.53333
19	58		5.08327		0.529167	65		7.63333
21	50		5.54142		1.885	67		8.25
23	61		6.15665		2.50333	74		6.76667
10	36		2.62236		-0.0644444	49		7.96667
10	53		2.84925		0.419722	69		7.46667
12	58		3.14159		1.53583	66
12	51		3.33794		-0.0969444	56
14	47		3.67828		0.503333	69		8.1
14	72		3.89208		1.795	65		9.41667
16	62		4.19315		-0.0972222	42		8.21667
19	58		5.15308		-0.171944	66		7.46667
20	52		5.37125		0.958333	75		8.56667
21	44		5.62869		-0.0933333	73		7.81667
22	48		5.9603		1.23778	80		9.18333
23	28		6.08684		-0.0513889	52		9.53333
11	50		2.93215		1.91611	53		9.75
13	49		3.44266		-0.148611	53		8.28333
14	54		3.79173		1.89778	61
15	59		4.06225		1.83194	39
16	55		4.27169		2.51278	53		9.34944
17	44		4.67748		-0.243611	54		7.51083
22	55		5.92103		0.983889	66
10	60		2.74453		1.68	65		7.00167
10	52		2.85798		2.15889	38		8.00361
11	51		3.11978		-0.000555556	66		9.15556
12	65		3.29867		1.7775	69		7.89611
14	51		3.7001		0	63		10.0489
19	41		5.08763		-0.13	49		8.93056
10	59		2.61799		0.515556	32		7.8425
11	49		2.91034		1.50944	25		7.90972
11	56		3.03687		0.577222	45		8.03472
12	68		3.31176		-0.0233333	78		9.80083
15	57		3.95317		-0.0569444	64		8.0775
15	72		4.0928		-0.0616667	64		7.46056
16	59		4.34587		-0.0766667	62		7.1425
17	60		4.6513		-0.111389	43		7.67389
19	66		5.044		0.509722	73		8.56
19	62		5.19235		-0.0555556	44		7.97806
20	65		5.47161		-0.111111	54		7.72972
8	46		2.34747		0.505278	53		7.67806
9	43		2.53073		-0.0725	56		7.57861
10	58		2.74017		0.550833	58		7.74139
12	65		3.39467		-0.0947222	80		7.73639
13	62		3.52557		-0.0797222	72
14	68		3.78736		-0.0486111	99		7.7
15	70		4.04916		0.503056	97		9
19	80		5.09636		-0.0177778	96		8.58333
20	74		5.23599		2.99056	95		7.61667
21	52		5.49779		0.07	49		7.66667
22	68		5.95594		0.503889	77		8.25
8	32		2.26456		2.54278	67		7.43333
9	55		2.40855		-0.0130556	42		8.55
10	90		2.67472		1.50667	58		8.53333
11	84		2.98451		2.69889	78		8.5
13	90		3.63901		0.00361111	71		7.96667
14	90		3.77427		1.50389	70
16	79		4.23679		2.7025	66
7	79		1.9155		0.00333333	42		8.57861
7	30		1.95913		0.5275	74
9	64		2.35619		1.51056	87		8.25778
10	86		2.62672		2.80889	69		8.26306
14	80		3.68264		0.0302778	83		6.96222
14	69		3.81354		1.12722	73		8.28028
15	63		4.08843		1.5025	64		8.26417
20	71		5.26217		2.87111	80		7.28611
22	65		6.00393		-0.0130556	49		8.25278
6	60		1.66679		1.70222	79
6	45		1.67115		2.50389	86		8.67472
7	56		1.9155		0.00222222	46		12.0083
7	38		2.07694		1.505	58		9.26111
9	74		2.44346		-0.0141667	50		9.22028
12	67		3.18959		1.02778	78		8.77028
12	44		3.34231		-0.0136111	53		9.0975
13	18		3.60847		0.753611	67		10.5356
19	56		5.11818		1.51694	64		6.59722
20	40		5.27526		-0.0138889	63		8.24806
22	64		5.95594		0.951389	73		10.0981
23	62		6.23519		1.54583	61		10.0389
7	25		2.06385		2.50194	70		8.8175
8	31		2.29074		-0.00194444	57		8.57583
13	61		3.42521		0.505	68		9.10444
13	51		3.56047		2.50278	75		9.65972
18	43		4.90438		0.00333333	48		10.7475
19	60		5.10509		0.5375	63		10.0328
22	19		5.83376		1.505	56		10.3314
7	10		1.9984		2.81222	54		8.9075
8	34		2.15548		-0.0302778	56		9.33722
9	44		2.40855		0.508333	69		9.45806
10	33		2.66163		1.59389	41		9.44833
13	31		3.48193		-0.0127778	27		10.3131
14	57		3.88336		0.6075	62		9.64806
19	46		5.19235		2.06778	85		9.50028
21	32		5.59378		2.50806	68		8.98028
21	36		5.59378		0.00305556	29		8.62056
7	14		2.03331		1.53861	94		7.70694
8	36		2.20348		2.53139	73		7.43694
9	42		2.43037		0.00194444	29		7.46139
10	35		2.69217		0.746944	68		7.22
14	37		3.80482		1.50583	65		7.41667
14	53		3.9139		0.00222222	42		7.4775
18	48		4.9611		0.79	57		7.52056
20	46		5.34507		1.78972	56		7.50778
22	38		5.82504		2.63167	59		7.55889
22	45		5.95594		-0.0127778	38		7.29361
8	41		2.27329		2.50389	68		7.80167
8	44		2.34747		2.64333	61		7.87583
13	44		3.65646		-0.0141667	38
14	38		3.80045		0.683889	51		8.59556
17	29		4.65567		1.88417	58		8.45889
20	42		5.23599		2.61417	52		8.43111
20	35		5.36689		0.00166667	43		8.01
21	29		5.65923		0.936944	57		8.92861
9	53		2.55254		1.90722	67		8.59417
10	53		2.70526		2.99361	55		7.59917
11	55		2.96706		0.00194444	62		8.09694
12	54		3.22013		1.54778	67		8.25972
14	68		3.91826		2.50333	62
15	48		4.06225		-0.0191667	33		8.91722
16	58		4.44623		2.52528	77
18	41		4.84765		-0.142222	55		8.76444
18	50		4.86947		0.510833	54		8.38639
19	55		5.00037		1.66556	51		8.72778
19	53		5.13563		0.0025	69		8.14472
21	41		5.57633		1.93389	59		8.51833
22	48		5.95594		-0.139167	56		6.51083
7	57		1.97222		1.94167	58		8.67278
7	43		1.97659		-0.00277778	70		7.42306
8	45		2.19911		0.553333	43		7.655
9	45		2.40419		1.50333	19		7.41333
10	52		2.68781		0.0111111	41		7.60111
13	48		3.62156		0.732222	35		6.5925
18	47		4.83893		1.76806	15
18	38		4.95237		2.54917	22		8.45194
19	43		5.15308		-0.00194444	35		6.63833
20	30		5.4367		0.558889	3		8.67028
21	30		5.54578		1.63806	9		6.60667
11	47		2.9147		2.57972	28		6.61417
11	57		3.08487		0.0130556	58
12	41		3.3074		0.506389	50		6.11194
15	60		3.9619		1.69778	55		6.26444
18	35		4.83893		-0.103611	55		6.18111
18	29		4.95674		0.504167	40
22	48		6.00393		-0.0111111	55		6.67639
9	86		2.47837		0.803333	49		6.58583
10	91		2.63108		1.50222	54		8.91444
10	69		2.79689		-0.0730556	59		7.76917
12	28		3.14159		0.0122222	57		9.45778
12	86		3.32049		0.649722	53		8.8875
14	22		3.74809		2.2475	45		9.31722
14	9		3.831		2.72889	53		9.35528
18	36		4.9611		-0.291667	53		6.07861
18	27		4.96546		0.915278	48		6.10611
18	28		4.96983		1.50472	51		7.49806
19	29		4.97855		0.0025	83		8.03944
19	33		4.98728		0.290556	79		7.43583
19	36		4.98728		0.0208333	90		9.74056
19	29		4.996		0.551389	88		8.74139
19	31		5.00473		1.50611	72		9.55111
20	40		5.23599		-0.0344444	66		10.3761
7	31		2.07694		1.05056	73		7.06667
8	52		2.22529		1.56	76		7.48333
9	69		2.48709		-0.0786111	73		7.66667
11	2		3.11541		2.39639	77		8.06667
13	10		3.53429		2.73306	69		7.11667
14	26		3.79609		-0.0436111	61		6.25
18	76		4.92183		0.541667	83		6.55
8	70		2.10312		1.98722	73		5.96667
8	82		2.25147		2.50611	79		7.3
9	22		2.52636		-0.0136111	72
13	89		3.44266		0.558889	81		7.96667
15	77		4.03607		1.51306	82		7.79389
18	49		4.83893		2.945	78
18	40		4.85638		-0.00194444	79
18	47		4.86074		0.198889	82		7.46833
18	46		4.87383		-0.0791667	82		8.80278
18	47		4.90001		1.39278	80		6.19028
18	45		4.90438		2.60028	79		8.00722
18	47		4.90438		-0.118056	71		7.79639
19	36		5.15308		0.658889	75		8.33639
20	32		5.25344		0.669167	73
21	32		5.6985		1.505	79
22	56		5.75959		2.64694	81
8	34		2.20348		0.0194444	78		8.78167
8	65		2.33438		0.505278	82		9.31528
10	36		2.72708		1.52806	78		12.1831
11	65		2.94524		2.50444	81		11.8789
13	70		3.54738		-0.296944	87		12.7158
13	76		3.57792		0.113333	82		9.37917
14	19		3.9139		0.170556	79		9.19889
15	68		4.06225		0.508333	84		9.27333
18	35		4.9131		0.121389	59		9.35722
19	64		5.1749		0.115278	46		11.7014
8	61		2.14675		0.136667	32		12.1072
14	84		3.831		0.1525	51		11.8739
15	71		4.01426		0.1225	52		8.43528
16	77		4.24988		2.04389	44		10.4753
20	54		5.24035		0.0969444	42
22	80		5.75959		0.524167	49		7.815
7	75		2.03767		0.0838889	55		8.00722
8	53		2.31692		0.5125	38		9.92917
10	71		2.74453		0.106389	44		7.79167
13	64		3.45575		0.535833	40		6.94361
13	73		3.63028		0.116111	49		6.79083
16	61		4.23679		0.149722	41		7.40806
18	74		4.96546		-0.0452778	52		7.20056
18	62		4.96983		0.572778	36		8.08472
20	30		5.48033		2.50556	51		8.21639
22	77		5.75959		0.00277778	31		7.63611
7	14		1.89368		0.576111	76		7.08361
10	13		2.84489		-0.0144444	19		7.52222
10	27		2.84489		0.514722	57		8.14694
15	87		4.18443		1.55306	55		8.13611
16	90		4.32405		2.55444	59		8.1175
19	76		5.04836		-0.0472222	27		8.16917
19	48		5.18363		0.505	63		8.02139
20	58		5.44543		1.51944	58		9.30889
22	70		5.75959		2.505	61		8.00167
10	68		2.72708		0.00333333	20		9.34194
12	50		3.3554		0.5075	43		8.35778
15	66		4.15388		1.81083	63		8.01194
16	80		4.33278		-0.0652778	51		8.09389
20	68		5.37998		0.505833	49		8.22111
21	51		5.5676		1.50472	62		9.13667
7	42		1.85878		2.81444	61		7.57139
11	7		2.92779		0.0025	49		7.30472
14	70		3.87027		0.5125	48		8.53111
15	46		4.0928		1.94639	47		7.18639
16	51		4.42005		-0.0975	50		6.76056
21	86		5.53706		0.510556	51		6.09278
22	49		5.75959		1.50639	58		6.55972
22	22		5.7814		2.50694	57		6.9375
8	20		2.10312		-0.0486111	54		9.17944
8	46		2.23402		0.616111	54		8.10139
9	32		2.50455		1.60139	42
13	68		3.59101		2.50639	48		8
14	64		3.72628		-0.115	35		8.75
17	50		4.54658		0.505278	44		6.36667
20	78		5.31016		2.20417	57		6.83333
22	68		5.75959		2.53889	45		7.31667
9	62		2.45219		-0.0652778	54		7.23333
13	77		3.4383		0.5425	55		8.06667
13	69		3.4383		1.56722	51		8.4
18	76		4.9131		-0.0613889	30		8.35
20	34		5.29707		1.15611	38		8.5
20	36		5.29707		1.51639	44		7.46667
21	37		5.51088		2.54083	47
22	57		5.75959		-0.0588889	22		7.85
7	49		2.06385		2.01306	39		7.01667
13	25		3.56047		2.50222	45		7.75
19	60		5.10072		-0.0386111	52		6.03333
22	57		5.75959		2.84861	47		6.8
8	100		2.23838		0.00305556	46		8.03333
9	100		2.48273		1.21889	48		6.55
10	100		2.67035		1.70361	48		6.93333
11	100		2.95833		2.51583	53
13	100		3.42085		0.0697222	51		6.53333
13	100		3.56483		0.00972222	51		7.33333
14	100		3.85718		0.00472222	49		7.4
15	100		4.0928		1.07611	53
17	100		4.52913		1.92806	50		7.02833
18	100		4.7822		0.611389	41		7.39722
19	100		5.22726		1.65611	52		8.275
20	100		5.35816		2.54556	51		7.72056
21	100		5.50215		0.00111111	44		8.135
21	100		5.50215		0.00555556	40		6.89139
22	100		5.75959		0.5025	42		7.04583
7	100		1.98531		1.53639	37		6.89556
9	100		2.37801		2.67361	46		6.89944
10	100		2.63981		0.00194444	51		6.92167
11	100		2.94088		1.405	40		8.34472
12	100		3.19832		1.67694	47
13	100		3.53866		2.71639	53		6.85917
14	100		3.79609		-0.0130556	39
15	100		4.07098		0.558611	64
17	100		4.63385		1.95	42		7.41667
18	100		4.72548		-0.0130556	62		6.23333
18	100		4.8302		0.52	55		7.18333
18	100		4.9611		1.51528	61		5.98333
19	100		5.21417		2.97583	59		5.75
21	100		5.61123		-0.114167	44		5.86667
7	100		1.90677		0.974444	37		5.68333
8	100		2.30383		1.61222	60		9.08333
9	100		2.56563		-0.0147222	38
10	100		2.82307		0.944444	64		8.2
11	100		3.01506		1.75972	65		8.33333
12	100		3.27686		-0.213611	45		8.18333
18	100		4.79093		-0.0302778	51		7.08333
19	100		5.00909		0.691667	72		6.68333
21	100		5.49779		0.00194444	54		7.88333
21	100		5.54142		1.13306	65		5.73333
23	100		6.21774		2.43639	65		5
11	100		3.08923		-0.005	55		7.55
12	100		3.34667		0.640278	70		6.53333
13	100		3.64774		0.00111111	60		6.66667
14	100		3.74373		2.9925	42		12.45
14	100		3.86154		-0.0808333	56		7.44972
15	100		4.12334		1.58528	59		7.41917
17	100		4.6513		2.50444	65		8.105
18	100		4.89565		0.00611111	67		6.6425
19	100		5.01782		0.725278	67		7.09833
19	100		5.06145		1.54528	67		6.83944
20	100		5.27962		2.63222	70		7.21417
21	100		5.54142		0.0863889	62		7
7	81		1.9984		0.547778	64		8.17556
9	100		2.53073		1.96806	67		9.17194
10	100		2.79253		2.96361	69		7.09972
11	100		3.00633		-0.0108333	63		7.25278
12	100		3.14159		0.528889	70		7.6775
13	100		3.40339		1.7325	74		12.0489
14	100		3.783		0.00166667	82		11.2217
15	100		3.93572		1.12861	91		11.5864
16	100		4.19752		2.51139	97		11.1019
18	100		4.76039		0.00166667	74		12.1292
18	100		4.85638		1.69417	87		8.40583
18	100		4.91747		-0.0183333	79		10.8767
19	100		5.03091		1.52806	85		10.4511
19	100		5.2229		-0.00166667	93		6.63944
20	100		5.4847		0.929444	91		9.01944
21	100		5.49779		1.69167	75
7	71		2.05513		2.59556	66
8	100		2.31692		-0.0130556	79		7.61194
9	100		2.57872		1.10917	82		7.50056
11	100		2.97142		1.55139	78		7.51444
12	100		3.23322		0.00138889	72		8.26222
16	100		4.2586		0.574444	90		7.39472
17	100		4.60767		0.0025	82		7.08556
18	100		4.78657		1.01694	64		6.59083
19	100		5.04836		-0.3175	80		7.4075
21	100		5.49779		0.533056	92		8.16528
23	82		6.04757		2.97194	82		8.00361
23	69		6.17847		0.00361111	88		8.28472
8	82		2.09876		1.51444	71		8.07639
8	88		2.23402		2.56528	30		8.0625
10	99		2.75762		-0.110278	61		8.01778
11	100		3.13287		0.502222	93		7.84417
12	100		3.39467		2.50361	82
13	100		3.53866		2.85917	80		6.58778
14	100		3.67392		-0.148056	87		7.75611
15	100		3.93135		0.475833	96		8.03639
15	100		4.14952		1.52361	80		7.59194
16	100		4.28915		0.00166667	88
17	100		4.48113		1.50417	87		6.7
17	100		4.62949		2.50361	84		6.66667
17	100		4.6513		0.00361111	4		9.75
18	100		4.94365		0.944722	55		8.53333
19	100		5.21417		1.55944	84		3.05
20	100		5.34507		2.88472	73		3.03333
21	92		5.50651		0.00166667	66		6.61667
21	100		5.67668		0.504444	83		6.61667
22	89		5.93848		2.50694	83		9.4
7	76		2.04204		-0.00666667	85		9.445
8	100		2.1773		0.571667	77		6.48583
9	100		2.44346		1.50278	96		7.50917
10	100		2.7009		-0.0972222	53		7.5775
11	100		3.10669		0.576667	87		9.72028
12	100		3.36849		2.50222	88		9.72167
13	100		3.54738		0.00166667	80		7.33417
14	100		3.73064		0.505833	94		7.4225
15	100		3.99244		1.55056	87		7.445
16	100		4.34587		2.50278	100		7.39139
17	100		4.59458		-0.0805556	62		7.06528
18	100		4.86074		0.521944	94		8.50639
19	100		4.99164		1.50278	100		9.25333
19	100		5.08763		2.77222	79		7.58444
19	100		5.17926		0.00555556	75		9.30833
20	100		5.31016		1.09417	77		9.67
21	100		5.50215		1.50667	72		10.0158
21	100		5.66359		-0.00888889	74		9.01
22	100		5.92976		2.50611	71		8.93306
8	71		2.15548		0.00166667	64		7.89306
9	100		2.41728		1.50444	70		8.36944
10	92		2.67908		0.00305556	58		8.17
10	79		2.8667		0.523056	67		8.73083
11	100		2.9976		0.00194444	74		8.43167
12	100		3.2594		2.92361	71		8.59611
13	87		3.61283		0.00194444	71		8.46333
14	100		3.76118		0.504167	72		8.855
15	88		4.02298		1.51167	69		8.50417
16	95		4.33278		2.50639	71		8.62056
17	100		4.47677		-0.0286111	58		6.92111
18	97		4.76475		0.02	52		6.89
18	100		4.92183		-0.0141667	72		8.72361
19	97		5.1269		1.12056	60		8.76806
20	87		5.3887		0.00166667	72		2.04
21	87		5.49779		1.84667	70		2.03611
7	73		2.03767		0.00305556	74		7.14417
8	69		2.16857		1.50556	52		6.92028
10	94		2.69217		0.0177778	77		7.37389
11	100		2.90161		1.06333	64		8.08
11	100		3.06742		2.77806	55		7.99611
12	100		3.33358		0.0127778	56		7.30833
14	95		3.75246		1.79389	63		5.27111
14	100		3.89208		2.50611	52		10.3894
15	100		4.15388		0.0138889	65		8.64083
16	100		4.32842		1.73472	65		8.87333
17	100		4.45495		2.50472	56		9.33917
17	100		4.6513		0.0127778	22
18	100		4.9131		1.14083	51		1.51306
19	100		5.11818		0.0158333	47		9.01083
20	100		5.34507		0.991944	62		5.97556
21	88		5.49779		1.815	68		10.2161
21	77		5.60687		0.00944444	48		8.63
8	87		2.11185		1.715	54		11.7219
9	100		2.37365		0.00361111	47
12	100		3.36412		0.508056	76		6.56667
13	89		3.58665		1.56556	100		6.56667
14	99		3.75682		2.74778	43		8
15	100		4.01862		0.00305556	88		6.86667
18	96		4.72984		1.17444	92		6.26667
18	100		4.87383		2.66778	86		8.1
18	100		4.9611		0.00305556	73		8.38333
19	100		5.17054		0.512222	92		6.8
20	100		5.35816		2	88		6.51667
21	87		5.50215		2.50444	92
21	100		5.65487		0.0116667	54
22	97		5.91667		0.575	69		8.44778
7	68		2.03331		1.52444	83		7.12528
8	93		2.22966		2.59472	83		7.50056
9	100		2.50018		0.0025	46		7.03333
11	100		3.02378		0.505556	71		6.27472
12	100		3.18523		1.51583	88		6.30194
13	100		3.44703		0.00222222	52		6.97944
14	100		3.74809		0.506667	73		6.98722
15	100		4.08843		1.66	76		6.89139
16	100		4.23242		0.00222222	68		7.46722
16	100		4.36332		0.504167	86		9.83861
17	94		4.4855		1.68778	80		8.8125
17	100		4.6164		0.00194444	88
18	78		4.8782		1.525	81		8.18333
19	97		5.044		2.62444	69		7.33333
20	97		5.24471		0.00194444	66		12.1667
21	88		5.50651		0.503889	83		6.15
22	98		5.85558		-0.00305556	93		8.28333
23	97		6.10865		0.521389	82		9.01667
9	88		2.53509		-0.00972222	91		7.03333
11	88		2.93215		0.521111	87		9.33333
12	93		3.18959		1.78194	84		8.00389
14	83		3.831		2.50694	70		7.50028
15	39		3.98808		0.00388889	94		8.54222
19	94		5.10509		0.523611	91		8.01056
21	96		5.5676		1.51806	91		9.0925
8	90		2.2602		0.00611111	69		8.755
11	89		2.90161		0.513056	76		7.84361
12	95		3.14159		2.46444	81		7.59389
12	95		3.3074		2.50417	91		7.00861
14	91		3.7001		-0.448611	76		9.59639
15	87		3.9619		0.000277778	92		8.01167
18	43		4.72112		0.944167	87		9.58083
20	56		5.24471		1.50667	87		9.00556
6	32		1.78024		0.0025	88		9
13	93		3.47321		0.508611	89		9
13	95		3.47321		1.58083	91		9
13	99		3.6041		2.71917	92		9
14	91		3.76118		0.00111111	87		9
15	91		4.06225		0.7125	85		9
21	88		5.59814		2.51639	90		9
23	82		6.07811		0.00194444	87		9
9	86		2.49582		0.558611	91		9.03333
11	92		2.89725		1.59167	86		8.98333
12	91		3.17214		2.62917	87		9.06667
14	91		3.70882		0.0025	92		10.0333
19	94		5.18799		0.510278	84
21	89		5.54578		2.5075	92		8.96667
22	88		5.75959		0.0025	92		8.95
23	69		6.02139		1.185	90		7.75
8	47		2.23838		1.71139	84		7.63333
9	38		2.36928		2.50806	89		9.15
10	38		2.63108		-0.0294444	43		10.0333
11	61		2.89288		0.503333	65		8.2
12	86		3.27686		1.73194	34		7.63333
20	94		5.24035		-0.0302778	44		7.63333
20	94		5.41488		1.53139	51		7.53333
20	90		5.44979		-0.115833	51		7.68333
21	92		5.57196		-0.03	33		10.8167
21	92		5.6505		0.5075	58
22	89		5.83813		1.73944	54		8.25
10	59		2.66163		-0.015	50		8.01667
10	77		2.79253		0.505278	61		7.68333
11	94		3.07614		2.07444	61		9.2
13	91		3.54738		2.57944	57		7.91667
14	89		3.76555		-0.0313889	22		8.65
14	19		3.90517		1.41444	53		8.31667
15	57		4.16261		-0.0316667	20		8.66667
17	91		4.64258		1.50278	63		8.5
18	94		4.77348		2.1825	68		8.41667
19	93		5.08327		2.46806	61		9.08333
20	94		5.33634		2.47722	75		8.22639
21	87		5.49779		-0.0597222	23		9.83333
21	86		5.50215		0.504167	67		9.2
21	89		5.60687		1.59778	77		8.85
21	96		5.73777		2.8775	69		9.51667
22	95		5.99957		-0.0311111	43		10.6167
8	95		2.3082		-0.0980556	41		8.7
9	91		2.4391		1.50333	61		12.15
10	91		2.7009		2.56972	44		11.35
12	90		3.2594		2.97417	49		8.91667
13	39		3.62592		-0.0977778	39		10.3333
15	55		3.97935		-0.08	20		11.4833
19	92		5.05709		2.48667	6		8.96667
19	91		5.16617		-0.0138889	60
20	68		5.29707		0.564444	69
21	62		5.50215		0.00194444	100		9.59361
8	61		2.22529		1.50722	74
9	71		2.35619		0.00166667	15		10.3858
10	91		2.81434		-0.0352778	86		9.07028
11	92		2.98451		0.00194444	73		9.12667
13	90		3.59101		2.71611	63		9.12917
14	38		3.74373		0.00166667	17		10.21
14	35		3.76118		2.18944	71		13.1872
14	67		3.92263		2.57806	17		10.9322
19	79		5.21853		0.00138889	47
20	85		5.4847		0.00222222	71		8.9475
21	89		5.52397		0.519167	97
8	60		2.27329		2.62194	89		8.82056
11	76		3.05869		-0.0336111	84		8.69222
12	87		3.31176		0.601111	97		8.53389
13	89		3.50811		2.03694	84		8.82417
19	87		4.99164		-0.0141667	68		8.22083
21	65		5.57633		0.784167	83		8.79917
21	63		5.57633		-0.0263889	90		9.57167
22	68		5.92539		0.528333	90		9.12444
23	25		6.05629		1.77139	87
8	93		2.10749		-0.165	88		8.05472
9	80		2.48709		0.757778	96		7.815
9	67		2.50018		1.46389	96		7.78028
13	95		3.61719		0.00138889	92		7.75278
14	71		3.783		1.9075	92		7.75333
15	90		4.03607		2.61056	92		7.75583
18	89		4.81275		2.62139	96		5.50806
21	78		5.49779		-0.015	96
22	61		5.86867		0.501944	96
22	72		5.98212		1.72972	92		7.75556
8	81		2.24711		2.58389	93		7.78722
11	97		3.06742		-0.0547222	49
14	93		3.68701		0.506667	38		8.41667
14	94		3.82663		1.55333	50		8.1
16	77		4.21497		2.50361	59		8.15
16	94		4.21497		0.00277778	64		6.86667
20	89		5.24908		1.765	27		7.96667
20	77		5.48906		2.51861	53		7.95
21	72		5.50215		-0.165	55		7.5
22	43		5.82067		1.50611	50		7.43333
8	86		2.33874		2.50472	47		8.15
12	80		3.38158		0.0183333	65		7.6
13	85		3.53429		0.506667	32		7.8
14	82		3.783		2.55833	67		8.7
15	90		4.0448		2.56083	72		8.26667
17	92		4.48986		-0.00111111	28		8.5075
18	84		4.88692		0.508333	24		8.00472
20	97		5.27962		1.68361	43		8.34278
20	95		5.28835		2.66472	45		9.375
22	68		5.75959		0.00916667	26		7.84556
10	91		2.62236		0.5025	41		8.41861
11	91		2.96706		2.51917	75		7.76167
12	90		3.25068		2.52167	68
16	96		4.28915		0.0222222	15
17	88		4.5684		2.83139	35
17	99		4.70803		2.83833	31		9.75889
18	95		4.86511		2.89972	31		9.11167
21	97		5.57196		0.00527778	64		9.05361
22	97		5.75959		2.35083	67		9.15
7	92		2.05076		2.3525	57		9.05028
9	93		2.47837		2.51028	52		9.04889
13	92		3.64337		0.0163889	57		9.02056
14	96		3.77427		1.55694	52		9.00194
18	94		4.71239		1.55833	47		9.00472
18	91		4.84329		0.00555556	72		9.00111
19	85		5.20544		0.0313889	71		8.96
20	83		5.4367		0.0188889	68		9.00528
22	93		5.75959		-0.0436111	45
8	89		2.11621		1.92167	50		8.31306
8	94		2.24711		0.00611111	48		8.00111
9	98		2.50891		0.0138889	61		8.01583
11	87		2.92343		-0.00833333	50		8.00083
12	85		3.32485		0.988611	62		8.00972
13	81		3.47321		1.62167	73		8.00444
19	91		5.00037		2.50472	67		8.00139
20	86		5.46724		-0.0138889	46		8.01056
8	91		2.10312		0.503889	43		8.00778
8	90		2.26456		1.50611	56		8.01361
14	86		3.79609		2.58861	79		8.01194
15	87		3.97062		-0.0133333	68		8.09278
16	8		4.23242		0.545278	69		8.26806
18	65		4.7822		1.50472	78
18	88		4.81711		2.50389	79		10.3961
18	94		4.82147		0.00166667	75		10.9411
18	90		4.84329		0.507222	76		8.95972
18	93		4.8782		1.52778	84		7.44028
18	88		4.95237		2.50361	78		8.75611
19	83		5.10509		-0.0313889	78		5.14639
20	94		5.39743		0.558056	75		7.78333
22	88		5.75959		1.72417	81
11	91		2.95833		2.86639	76		10.5058
12	76		3.24631		-0.0186111	72		10.34
13	89		3.49502		0.518056	64		10.2986
13	14		3.61283		1.68111	73
17	30		4.46804		2.88194	70		6.9
19	96		5.10509		0.00138889	82		7.48333
20	92		5.24471		0.503611	80		8.48333
21	91		5.50651		1.50361	78		7.08333
22	96		5.75959		2.51222	79		8.01667
6	63		1.82387		0.00138889	76		7.93333
8	99		2.30383		1.74194	77		7.73333
12	83		3.32049		2.50417	87		6.5
15	95		3.93572		0.0147222	77		8.63333
16	72		4.29787		0.628889	75		8.73333
17	94		4.45495		2.25611	81		8.76667
19	86		5.044		2.50222	79
20	93		5.32762		-0.00527778	77
20	64		5.46724		2.13361	81		6.83194
21	90		5.61996		2.50444	81		7.81194
21	92		5.72904		-0.00138889	77		7.23694
22	79		5.75959		2.54333	76		6.58833
9	90		2.36056		1.65444	82		6.84861
9	95		2.49146		-0.0466667	73		7.34194
13	86		3.49066		0.506667	74		6.85278
14	93		3.70882		2.125	71		8.14722
14	95		3.87899		2.50306	87		7.35333
15	0		4.12334		-0.112778	65
18	91		4.95237		1.80694	80		8.08333
19	57		5.16181		2.57139	82
[truncated: 87,537 more rows]

## Sheet: Fig3
Target	Fixed effects																	Random effects
Morning Alertness	se_pcen	spt_pcen	sleepoffset_hr_pcen	L5VALUE	L5TIME_num	M10VALUE_daybefore	M10TIME_num_daybefore	meal_type_breakfast	meal_log_iauc_breakfast	meal_offset_to_breakfast_hr	age	sex	bmi	zygosity	sunrise_hr	dst	weekend	family_id	username
47.25	0.001543	0.926686	0.955952	2.72118	0.668056	48.3653	7.83472	MCB	0.777249	-0.209444	53.6454	F	25.5304	MZ	7.8	FALSE	FALSE	predict1009	predict10091
51.75	0.034187	0.089186	-0.327381	2.17519	2.66806	17.6157	9.33472	OGTT	1.01236	1.58694	53.6454	F	25.5304	MZ	7.73333	FALSE	FALSE	predict1009	predict10091
59	-0.023392	1.57113	1.35595	2.30489	4.66806	56.7112	10.0014	High Fibre	0.774941	0.625833	53.6454	F	25.5304	MZ	7.58333	FALSE	TRUE	predict1009	predict10091
50	0.003077	0.091072	-0.458333	5.01315	0.334722	54.1594	7.16806	MCB	0.864187	2.02472	53.6454	F	24.2726	MZ	7.8	FALSE	FALSE	predict1009	predict10092
53.8	0.036777	-0.175595	0.058333	4.03073	2.66806	48.3738	10.1681	High Carb	1.24857	2.81667	53.6454	F	24.2726	MZ	7.78333	FALSE	TRUE	predict1009	predict10092
36	-0.018113	-1.48671	-0.375	1.5973	2.33472	53.4391	9.66806	High Carb	1.083	3.1925	53.6454	F	24.2726	MZ	7.76667	FALSE	TRUE	predict1009	predict10092
77	-0.113107	-2.01032	-1.775	3.7451	0.168056	48.4645	10.0014	UK Average	0.795114	3.9625	53.6454	F	24.2726	MZ	7.73333	FALSE	FALSE	predict1009	predict10092
26.5	0.039059	-0.579762	-1.60833	3.92772	0.001389	56.8903	8.33472	OGTT	0.837099	1.60389	53.6454	F	24.2726	MZ	7.71667	FALSE	FALSE	predict1009	predict10092
55.6667	-0.031825	1.06191	0.641667	4.06055	0.001389	45.6785	6.83472	OGTT	0.935896	0.0716667	53.6454	F	24.2726	MZ	7.7	FALSE	FALSE	predict1009	predict10092
73.75	-0.021419	-0.729762	-0.491667	1.97101	0.501389	54.8344	9.16806	UK Average	0.803545	0.701389	53.6454	F	24.2726	MZ	7.66667	FALSE	FALSE	predict1009	predict10092
72	0.050977	0.207738	-0.308333	5.10114	2.33472	54.1128	7.16806	High Protein	0.795666	2.19111	53.6454	F	24.2726	MZ	7.65	FALSE	FALSE	predict1009	predict10092
43	0.010168	-0.076984	-0.191667	3.24321	2.50139	42.0478	10.6681	High Fibre	1.12859	1.45556	53.6454	F	24.2726	MZ	7.61667	FALSE	TRUE	predict1009	predict10092
76.3333	0.050826	-0.51379	0.019048	3.68373	1.50139	32.3252	7.66806	OGTT	0.963129	0.559167	43.1102	F	21.62	MZ	6.01667	TRUE	FALSE	predict1018	predict10181
91	-0.023654	1.66815	0.085714	3.32524	0.168056	30.9829	7.66806	UK Average	0.995152	0.615833	43.1102	F	21.62	MZ	5.98333	TRUE	FALSE	predict1018	predict10181
83	-0.031933	-0.559623	0.002381	5.0682	0.001389	46.5608	7.83472	OGTT	0.928008	0.0455556	43.1102	F	21.62	MZ	5.95	TRUE	FALSE	predict1018	predict10181
85.75	-0.048675	0.613988	0.085714	2.57538	0.834722	33.7062	6.00139	High Protein	0.822793	0.551667	43.1102	F	21.62	MZ	5.9	TRUE	TRUE	predict1018	predict10181
96.5	-0.014902	-0.788195	-0.395238	7.34004	0.668056	68.5473	7.50139	High Carb	1.1936	2.05917	42.9678	F	22.7287	MZ	7	FALSE	FALSE	predict1018	predict10182
84.75	-0.067755	0.209027	0.338095	7.83105	-5.16528	27.8437	7.50139	OGTT	0.886479	1.5325	42.9678	F	22.7287	MZ	6.96667	FALSE	TRUE	predict1018	predict10182
94	-0.047455	2.31042	0.471429	6.0521	0.668056	45.7712	6.66806	OGTT	1.38522	1.47778	42.9678	F	22.7287	MZ	6.93333	FALSE	TRUE	predict1018	predict10182
92.5	-0.025938	-0.339584	-0.428571	5.09886	0.168056	30.9503	8.33472	UK Average	1.08529	0.859167	42.9678	F	22.7287	MZ	6.9	FALSE	FALSE	predict1018	predict10182
95.25	0.007538	-1.0882	-0.561905	6.8409	0.834722	84.4136	6.33472	UK Average	0.89775	0.953333	42.9678	F	22.7287	MZ	6.86667	FALSE	FALSE	predict1018	predict10182
86	0.062251	-0.03125	-0.545238	5.999	0.001389	38.3585	7.16806	High Fat	0.607352	1.17778	42.9678	F	22.7287	MZ	6.83333	FALSE	FALSE	predict1018	predict10182
87.5	-0.010021	0.722916	-0.378571	6.31091	0.168056	36.8621	8.83472	High Protein	0.777121	1.1175	42.9678	F	22.7287	MZ	6.8	FALSE	FALSE	predict1018	predict10182
88.75	0.01347	-0.459028	-0.795238	3.46226	0.001389	39.5767	6.50139	High Fibre	1.06376	1.36528	42.9678	F	22.7287	MZ	6.76667	FALSE	FALSE	predict1018	predict10182
88	0.044217	1.73135	1.70952	3.1672	1.33472	51.9599	9.00139	High Fat	0.502871	0.777778	62.141	F	22.3747	MZ	7.53333	FALSE	TRUE	predict1033	predict10332
94	-0.038251	-0.87004	-0.740476	3.15451	0.001389	70.1528	8.16806	High Carb	0.85286	2.57639	62.141	F	22.3747	MZ	7.56667	FALSE	TRUE	predict1033	predict10332
86	-0.052962	-0.303373	-0.707143	2.47543	0.501389	86.502	5.83472	High Carb	1.01981	2.85833	62.141	F	22.3747	MZ	7.6	FALSE	FALSE	predict1033	predict10332
63	-0.049581	0.131349	0.12619	3.169	0.501389	50.8733	7.16806	OGTT	1.41409	2.26389	62.141	F	22.3747	MZ	7.61667	FALSE	FALSE	predict1033	predict10332
90.5	0.07679	-0.865873	-0.72381	2.16243	0.501389	30.2799	12.5014	OGTT	1.34386	3.31	62.141	F	22.3747	MZ	7.65	FALSE	FALSE	predict1033	predict10332
87.25	0.048848	-0.760318	-0.707143	2.07091	0.668056	44.6589	10.0014	UK Average	0.811947	4.35694	62.141	F	22.3747	MZ	7.66667	FALSE	FALSE	predict1033	predict10332
81.5	0.003379	-0.783929	-0.857143	3.62628	0.501389	50.7848	5.66806	UK Average	1.09925	3.65833	62.141	F	22.3747	MZ	7.68333	FALSE	FALSE	predict1033	predict10332
92	-0.005635	0.346627	0.759524	2.02022	1.66806	62.3337	7.16806	High Fibre	0.824787	2.08917	62.141	F	22.3747	MZ	7.73333	FALSE	TRUE	predict1033	predict10332
79	0.025915	-1.01022	-0.405952	2.68373	0.168056	40.0218	7.83472	High Fat	0.770387	1.36972	59.5674	F	28.8705	MZ	7.8	FALSE	FALSE	predict1069	predict10691
89.75	0.019834	-0.07133	0.044048	2.34593	0.668056	42.7534	8.50139	MCB	0.804481	0.859722	59.5674	F	28.8705	MZ	7.78333	FALSE	TRUE	predict1069	predict10691
89.3333	-0.009961	0.959226	0.327381	3.45464	1.33472	41.537	8.33472	High Carb	0.95733	0.540278	59.5674	F	28.8705	MZ	7.76667	FALSE	TRUE	predict1069	predict10691
91	-0.005187	0.134226	-0.255952	3.2139	0.168056	50.7821	8.16806	High Carb	1.169	1.15833	59.5674	F	28.8705	MZ	7.73333	FALSE	FALSE	predict1069	predict10691
76.6667	0.006418	0.024503	-0.189286	3.88352	3.00139	23.197	11.6681	OGTT	1.13897	0.25	59.5674	F	28.8705	MZ	7.71667	FALSE	FALSE	predict1069	predict10691
98	-0.024172	-0.093552	-0.105952	7.63837	-7.16528	44.7083	8.00139	UK Average	0.815488	0.418333	59.5674	F	28.8705	MZ	7.7	FALSE	FALSE	predict1069	predict10691
78	0.045457	-4.67133	-0.589286	3.72174	0.001389	40.628	7.50139	OGTT	1.24436	0.116667	59.5674	F	28.8705	MZ	7.66667	FALSE	FALSE	predict1069	predict10691
91.6667	-0.024039	1.18423	-0.105952	1.96705	2.50139	41.095	9.83472	UK Average	1.00031	0.503056	59.5674	F	28.8705	MZ	7.65	FALSE	FALSE	predict1069	predict10691
93	0.016789	1.00506	0.677381	3.98713	0.334722	36.8745	8.83472	High Fibre	0.966108	0.361389	59.5674	F	28.8705	MZ	7.61667	FALSE	TRUE	predict1069	predict10691
92.6667	-0.024914	-0.392163	-0.672619	2.98804	1.50139	35.9298	9.50139	High Protein	0.708614	1.035	59.5674	F	28.8705	MZ	7.58333	FALSE	TRUE	predict1069	predict10691
94	0.042331	-0.300497	0.310714	3.746	1.33472	85.9058	8.33472	High Fat	0.711693	0.327778	59.5674	F	28.8705	MZ	7.56667	FALSE	FALSE	predict1069	predict10691
87.5	0.011658	-0.423313	-0.071429	5.51283	0.168056	42.0322	7.66806	High Fat	0.870068	1.36972	59.5674	F	27.2979	MZ	7.8	FALSE	FALSE	predict1069	predict10692
60.3333	-0.011653	0.369742	-2.22143	5.19712	1.16806	45.1229	6.50139	High Carb	1.29408	3.2225	59.5674	F	27.2979	MZ	7.76667	FALSE	TRUE	predict1069	predict10692
79.25	-0.020238	-0.759424	0.261905	12.6158	0.168056	48.9762	9.33472	High Carb	1.04299	1.76667	59.5674	F	27.2979	MZ	7.73333	FALSE	FALSE	predict1069	predict10692
79	-0.000566	0.739187	0.845238	7.03579	0.501389	29.6906	9.00139	UK Average	0.931087	0.863889	59.5674	F	27.2979	MZ	7.71667	FALSE	FALSE	predict1069	predict10692
94	-0.003192	-0.451091	0.678571	8.23755	2.16806	46.3713	8.50139	MCB	0.787197	0.759722	59.5674	F	27.2979	MZ	7.7	FALSE	FALSE	predict1069	predict10692
49	-0.052754	0.380853	-0.954762	13.7734	3.66806	56.2213	7.16806	OGTT	1.38108	0.573889	59.5674	F	27.2979	MZ	7.66667	FALSE	FALSE	predict1069	predict10692
82.75	0.025279	0.983631	0.978571	10.7889	1.00139	44.912	9.83472	UK Average	1.10164	1.43778	59.5674	F	27.2979	MZ	7.65	FALSE	FALSE	predict1069	predict10692
62.2	0.040647	-0.781647	-0.321429	4.31645	3.00139	34.4278	9.50139	OGTT	1.2932	0.276389	59.5674	F	27.2979	MZ	7.61667	FALSE	TRUE	predict1069	predict10692
72.75	-0.000847	-0.337202	1.31191	6.07191	3.50139	34.651	8.50139	High Protein	0.717183	0.180833	59.5674	F	27.2979	MZ	7.58333	FALSE	TRUE	predict1069	predict10692
77.6667	0.028993	0.603076	0.345238	8.75199	3.50139	69.106	8.50139	High Fat	0.714402	0.531944	59.5674	F	27.2979	MZ	7.56667	FALSE	FALSE	predict1069	predict10692
83.6667	-0.008678	0.337798	0.811905	5.06804	2.16806	31.4701	7.50139	High Fibre	1.04454	0.929444	59.5674	F	27.2979	MZ	7.53333	FALSE	FALSE	predict1069	predict10692
78.5	-0.019878	-0.689209	-0.562821	2.45309	0.001389	37.3682	9.50139	High Fat	0.83042	2.69444	51.5784	F	29.4526	MZ	7.68333	FALSE	FALSE	predict1082	predict10821
73.3333	0.049299	-0.001709	0.720513	3.82017	0.001389	36.8238	6.33472	High Carb	1.07371	1.74889	51.5784	F	29.4526	MZ	7.71667	FALSE	TRUE	predict1082	predict10821
37	0.021314	-1.13643	-0.546154	4.54446	1.33472	59.8714	10.0014	OGTT	1.47467	0.505556	51.5784	F	29.4526	MZ	7.76667	FALSE	FALSE	predict1082	predict10821
70	0.044349	-0.829487	-1.16282	4.74306	1.16806	33.0147	12.1681	UK Average	1.16722	3.46667	51.5784	F	29.4526	MZ	7.78333	FALSE	FALSE	predict1082	predict10821
53	-0.075601	-0.290598	-0.579487	3.29529	0.834722	39.095	6.33472	OGTT	1.29404	0.525	51.5784	F	29.4526	MZ	7.8	FALSE	FALSE	predict1082	predict10821
64.6667	0.028276	-0.728098	-0.546154	3.91906	1.33472	41.9613	10.1681	UK Average	1.30579	3.775	51.5784	F	29.4526	MZ	7.81667	FALSE	FALSE	predict1082	predict10821
65.6667	-0.019553	-0.041987	-0.562821	2.31825	0.668056	38.4092	11.8347	High Protein	0.83738	2.48472	51.5784	F	29.4526	MZ	7.85	FALSE	FALSE	predict1082	predict10821
45	-0.014066	-0.164209	0.370513	7.79453	4.16806	31.0992	10.1681	High Fibre	1.06196	2.535	51.5784	F	29.4526	MZ	7.88333	FALSE	TRUE	predict1082	predict10821
50.75	0.01821	-2.02936	-0.604762	1.49476	3.16806	38.2784	13.0014	High Fat	0.486193	1.03833	46.6338	F	29.8781	MZ	5.98333	FALSE	FALSE	predict1110	predict11101
48.75	0.061521	1.58869	1.71191	3.15182	0.168056	32.8576	8.83472	MCB	0.724537	0.845	46.6338	F	29.8781	MZ	5.95	FALSE	TRUE	predict1110	predict11101
59.75	-0.059884	2.82619	1.64524	3.3996	1.16806	62.7141	10.0014	High Carb	0.814466	0.05	46.6338	F	29.8781	MZ	5.9	FALSE	TRUE	predict1110	predict11101
44	-0.128536	0.724802	-0.571429	1.63915	2.33472	29.3767	9.16806	High Carb	0.846177	1.16972	46.6338	F	29.8781	MZ	5.86667	FALSE	FALSE	predict1110	predict11101
75.75	-0.046771	1.11786	0.711905	2.62303	1.00139	30.5674	9.16806	UK Average	1.06131	0.559722	46.6338	F	29.8781	MZ	5.83333	FALSE	FALSE	predict1110	predict11101
33	-0.012638	-0.021032	-0.388095	2.14463	1.00139	38.8726	6.33472	OGTT	0.930819	2.14833	46.6338	F	29.8781	MZ	5.78333	FALSE	FALSE	predict1110	predict11101
50	0.013742	-0.439087	-0.654762	1.69931	1.16806	49.3582	8.16806	UK Average	0.821111	0.779444	46.6338	F	29.8781	MZ	5.75	FALSE	FALSE	predict1110	predict11101
23	0.103082	-1.09464	-0.588095	2.46274	1.66806	32.7561	10.3347	OGTT	0.542162	0.77	46.6338	F	29.8781	MZ	5.71667	FALSE	FALSE	predict1110	predict11101
43.5	-0.034297	-2.45255	-1.26528	2.06999	2.16806	46.0778	6.83472	High Fat	0.717273	0.6825	46.6338	F	30.0312	MZ	5.98333	FALSE	FALSE	predict1110	predict11102
76.25	-0.066114	1.44329	1.28472	2.90681	0.334722	44.1757	9.00139	MCB	0.718815	0.463611	46.6338	F	30.0312	MZ	5.95	FALSE	TRUE	predict1110	predict11102
80	0.004083	0.447454	1.03472	3.97101	2.00139	35.9081	8.66806	High Carb	1.06388	0.418889	46.6338	F	30.0312	MZ	5.9	FALSE	TRUE	predict1110	predict11102
77	0.022392	-0.030324	0.468056	1.63974	0.834722	27.0545	13.3347	High Carb	0.876422	-0.615278	46.6338	F	30.0312	MZ	5.86667	FALSE	FALSE	predict1110	predict11102
51	0.052759	-0.705324	-0.665278	1.10324	0.001389	29.306	7.00139	UK Average	1.11495	0.392778	46.6338	F	30.0312	MZ	5.78333	FALSE	FALSE	predict1110	predict11102
68	0.043912	-0.251157	-0.665278	2.8931	1.66806	29.771	12.6681	UK Average	0.912209	0.416389	46.6338	F	30.0312	MZ	5.75	FALSE	FALSE	predict1110	predict11102
52	-0.054907	-0.54838	-0.831944	6.21376	1.83472	27.9403	9.16806	OGTT	1.33643	1.33556	46.6338	F	30.0312	MZ	5.71667	FALSE	FALSE	predict1110	predict11102
61.3333	0.021115	-1.22559	-1.26905	4.26344	1.33472	75.5218	12.6681	High Fat	0.491535	1.08972	43.7043	F	28.0005	NT	5.8	TRUE	FALSE	predict1113	predict1113
66.6667	-0.03197	1.00357	0.297619	4.54859	0.834722	53.2234	10.3347	High Fat	0.802137	0.998889	43.7043	F	28.0005	NT	5.83333	TRUE	TRUE	predict1113	predict1113
61.25	-0.022356	1.05357	0.664286	3.83735	2.83472	40.9895	11.0014	UK Average	1.25608	0.993889	43.7043	F	28.0005	NT	5.86667	TRUE	TRUE	predict1113	predict1113
43	-0.026515	-0.246428	-0.685714	4.22944	1.50139	30.7187	9.33472	High Carb	0.875145	0.543333	43.7043	F	28.0005	NT	5.88333	TRUE	FALSE	predict1113	predict1113
39	0.023777	-0.843651	-0.685714	2.81876	0.334722	56.689	11.1681	OGTT	1.08481	0.485	43.7043	F	28.0005	NT	5.91667	TRUE	FALSE	predict1113	predict1113
30.3333	0.014737	-1.15476	-0.935714	3.49538	1.16806	39.3041	7.83472	OGTT	0.8567	0.403889	43.7043	F	28.0005	NT	5.93333	TRUE	FALSE	predict1113	predict1113
50	0.034416	0.488294	0.514286	2.54653	1.66806	35.5874	7.66806	High Carb	1.15085	0.538056	43.7043	F	28.0005	NT	5.96667	TRUE	FALSE	predict1113	predict1113
52.25	-0.034716	-1.7631	-0.502381	3.91293	1.66806	36.8519	9.00139	High Fibre	1.07594	0.668611	43.7043	F	28.0005	NT	5.98333	TRUE	FALSE	predict1113	predict1113
25	0.025236	1.17639	2.13333	4.04287	2.16806	51.9625	9.16806	High Fat	0.525676	1.45306	46.4148	F	23.6563	MZ	6.88333	FALSE	FALSE	predict1119	predict11191
34.25	0.006474	2.15417	0.266667	4.57946	2.00139	56.8663	7.83472	High Fat	0.608605	1.21139	46.4148	F	23.6563	MZ	6.91667	FALSE	FALSE	predict1119	predict11191
34	0.004642	-0.120833	0.883333	4.31451	2.83472	69.7971	8.16806	High Carb	0.994188	1.1475	46.4148	F	23.6563	MZ	6.95	FALSE	TRUE	predict1119	predict11191
35	0.006918	0.756944	1.4	3.57846	0.668056	44.1614	12.3347	High Carb	0.898946	1.2	46.4148	F	23.6563	MZ	6.96667	FALSE	TRUE	predict1119	predict11191
31	0.025148	-0.813889	-1.1	3.46369	0.668056	54.7772	8.16806	UK Average	0.834767	1.33056	46.4148	F	23.6563	MZ	7	FALSE	FALSE	predict1119	predict11191
28	0.013007	-0.895833	-1.1	4.66953	1.00139	48.9539	9.50139	OGTT	0.904184	1.36528	46.4148	F	23.6563	MZ	7.03333	FALSE	FALSE	predict1119	predict11191
31.5	-0.066906	-1.07778	-1.16667	3.54807	1.16806	45.8752	12.6681	UK Average	0.73779	1.26833	46.4148	F	23.6563	MZ	7.06667	FALSE	FALSE	predict1119	predict11191
28	-0.022363	-0.145833	-0.1	5.47162	1.00139	54.7361	7.00139	OGTT	1.06829	1.68333	46.4148	F	23.6563	MZ	7.08333	FALSE	FALSE	predict1119	predict11191
30.5	0.007846	-1.03333	-1.21667	2.91617	0.001389	50.9757	7.66806	High Protein	0.63993	1.21833	46.4148	F	23.6563	MZ	7.11667	FALSE	FALSE	predict1119	predict11191
66.3333	0.041128	-1.6254	-4.79643	5.74465	2.00139	38.6772	12.0014	MCB	0.530647	5.52361	48.5448	F	23.8962	MZ	7.93333	FALSE	FALSE	predict1126	predict11261
57.6667	0.035118	1.16766	2.23691	5.07213	4.33472	48.8945	8.50139	High Carb	0.917438	1.13917	48.5448	F	23.8962	MZ	7.91667	FALSE	TRUE	predict1126	predict11261
53	0.000146	-0.197619	-0.229762	5.55482	0.834722	56.9972	12.0014	OGTT	0.852481	0.590278	48.5448	F	23.8962	MZ	7.88333	FALSE	FALSE	predict1126	predict11261
47.25	-0.125441	0.024603	-3.87976	5.82404	2.50139	51.8554	8.66806	UK Average	0.762722	4.02639	48.5448	F	23.8962	MZ	7.86667	FALSE	FALSE	predict1126	predict11261
22.5	0.028583	-1.24345	0.336905	4.48184	2.83472	46.8284	11.3347	High Fibre	1.07218	0.205833	48.5448	F	23.8962	MZ	7.8	FALSE	FALSE	predict1126	predict11261
36.5	0.040803	2.77877	1.58691	2.91536	3.33472	49.6718	8.66806	High Fat	0.623358	0.626667	48.5448	F	23.8962	MZ	7.78333	FALSE	TRUE	predict1126	predict11261
49	0.002807	-0.621428	0.111905	6.64524	3.16806	37.3848	9.66806	MCB	0.670607	0.89	48.5448	F	21.1206	MZ	7.93333	FALSE	FALSE	predict1126	predict11262
65.25	0.02446	-0.443651	0.278571	7.25123	2.16806	86.1851	9.50139	High Carb	1.03457	0.394167	48.5448	F	21.1206	MZ	7.91667	FALSE	TRUE	predict1126	predict11262
64.75	0.027107	-0.000595	-0.854762	3.54716	0.001389	114.823	9.16806	High Carb	0.879024	0.381667	48.5448	F	21.1206	MZ	7.9	FALSE	TRUE	predict1126	predict11262
54.6	0.027074	-2.78532	-1.98809	8.33856	1.16806	102.745	8.00139	UK Average	1.07498	0.408611	48.5448	F	21.1206	MZ	7.88333	FALSE	FALSE	predict1126	predict11262
28	0.020112	-0.039484	-0.121429	7.12602	0.834722	52.8125	7.83472	OGTT	1.4789	-1.6075	48.5448	F	21.1206	MZ	7.86667	FALSE	FALSE	predict1126	predict11262
42.5	0.003989	-1.48115	0.045238	5.42566	3.00139	41.4302	8.16806	OGTT	1.53524	-1.86833	48.5448	F	21.1206	MZ	7.8	FALSE	FALSE	predict1126	predict11262
53.75	-0.01907	1.11746	0.678571	3.78499	3.16806	129.776	9.00139	High Fat	0.46426	1.09028	48.5448	F	21.1206	MZ	7.76667	FALSE	TRUE	predict1126	predict11262
48.4	-0.008671	-2.2131	-0.754762	6.9084	2.16806	114.597	11.6681	High Fibre	0.941661	0.334167	48.5448	F	21.1206	MZ	7.73333	FALSE	FALSE	predict1126	predict11262
48.3333	0.005033	-1.71587	-0.988095	3.29308	1.50139	48.7673	12.8347	High Protein	0.854311	4.15333	48.5448	F	21.1206	MZ	7.71667	FALSE	FALSE	predict1126	predict11262
50.6667	-0.007063	0.401885	0.845238	2.69711	0.001389	33.464	6.33472	High Fat	1.02126	1.62611	54.9021	F	30.1738	DZ	6.91667	TRUE	FALSE	predict1174	predict11741
58	0.052214	-0.089782	0.661905	4.66464	2.50139	38.6775	9.50139	High Carb	1.55073	1.89889	54.9021	F	30.1738	DZ	6.95	TRUE	TRUE	predict1174	predict11741
50	-0.102257	-1.44256	-1.57143	4.04669	1.33472	61.6493	10.0014	High Carb	1.45784	4.45889	54.9021	F	30.1738	DZ	6.98333	TRUE	TRUE	predict1174	predict11741
66.3333	0.03781	-1.07034	-1.47143	2.85532	0.001389	22.4485	8.50139	UK Average	1.14502	3.76361	54.9021	F	30.1738	DZ	7.03333	TRUE	FALSE	predict1174	predict11741
14	0.075633	-3.11895	-1.73809	3.1251	0.168056	45.7047	6.83472	UK Average	1.23916	3.44667	54.9021	F	30.1738	DZ	7.05	TRUE	FALSE	predict1174	predict11741
68	-0.06685	0.592163	0.961905	4.11679	1.33472	27.0183	10.3347	OGTT	1.66041	1.43	54.9021	F	30.1738	DZ	7.08333	TRUE	FALSE	predict1174	predict11741
42	0.059119	0.956052	0.445238	3.28303	0.334722	31.2187	6.33472	High Protein	1.27173	1.13528	54.9021	F	30.1738	DZ	7.11667	TRUE	FALSE	predict1174	predict11741
32.6667	-0.000459	-1.89395	-2.85476	4.12688	0.001389	41.4947	11.0014	High Fibre	1.4288	5.36111	54.9021	F	30.1738	DZ	7.13333	TRUE	TRUE	predict1174	predict11741
62	-0.063156	1.61855	1.67857	3.70143	2.33472	49.6528	9.50139	High Protein	1.29234	2.16167	54.9021	F	30.1738	DZ	7.16667	TRUE	TRUE	predict1174	predict11741
100	0.002062	-0.602671	-0.142308	1.73587	0.501389	31.6328	9.33472	High Fat	0.810113	0.723611	59.7591	M	26.9656	MZ	6.33333	TRUE	FALSE	predict1183	predict11831
100	-0.050979	-1.03323	-1.32564	2.97863	0.168056	42.9955	8.16806	High Carb	1.13996	0.55	59.7591	M	26.9656	MZ	6.38333	TRUE	TRUE	predict1183	predict11831
90.3333	-0.110777	0.686218	0.341026	3.66589	0.501389	47.545	8.00139	UK Average	1.05998	-1.02194	59.7591	M	26.9656	MZ	6.46667	TRUE	FALSE	predict1183	predict11831
89.5	-0.023753	-1.41627	-0.232143	6.0879	1.50139	100.777	8.00139	High Fat	0.846848	2.00694	65.0431	M	24.0029	MZ	6.68333	TRUE	FALSE	predict1211	predict12111
32	0.036633	-2.6996	-2.69881	3.2397	1.33472	70.7107	8.33472	High Carb	1.46071	2.64333	65.0431	M	24.0029	MZ	6.7	TRUE	FALSE	predict1211	predict12111
89.6667	-0.009316	0.122619	0.034524	3.53744	1.66806	30.7458	9.00139	High Carb	1.2084	2.63639	65.0431	M	24.0029	MZ	6.73333	TRUE	FALSE	predict1211	predict12111
46	-0.029449	0.812897	1.05119	3.93362	3.50139	78.6465	11.1681	UK Average	1.08981	0.636111	65.0431	M	24.0029	MZ	6.76667	TRUE	TRUE	predict1211	predict12111
76.6667	-0.030526	1.68234	1.98452	6.02777	1.83472	28.8832	10.8347	OGTT	1.15276	1.31972	65.0431	M	24.0029	MZ	6.78333	TRUE	TRUE	predict1211	predict12111
92.3333	-0.066678	-2.69127	-2.41548	4.20854	2.33472	27.8459	11.0014	OGTT	1.08288	4.36833	65.0431	M	24.0029	MZ	6.81667	TRUE	FALSE	predict1211	predict12111
78.75	-0.031297	-0.009325	0.534524	6.05312	3.16806	48.9669	8.66806	UK Average	1.06672	1.10444	65.0431	M	24.0029	MZ	6.83333	TRUE	FALSE	predict1211	predict12111
91	-0.029378	0.264286	-0.386905	2.287	1.50139	28.7998	9.33472	High Fat	1.07615	2.04944	65.0431	M	24.2569	MZ	6.68333	TRUE	FALSE	predict1211	predict12112
92.5	-0.056324	1.3879	0.329762	4.13834	0.334722	86.6569	6.50139	High Carb	1.06439	0.672222	65.0431	M	24.2569	MZ	6.7	TRUE	FALSE	predict1211	predict12112
93.6667	0.015509	-0.462103	0.063095	3.458	1.33472	48.6137	7.16806	High Carb	1.23657	1.18722	65.0431	M	24.2569	MZ	6.73333	TRUE	FALSE	predict1211	predict12112
90.5	0.095625	-0.894047	-1.18691	3.31736	0.501389	24.8954	7.33472	UK Average	0.830407	2.415	65.0431	M	24.2569	MZ	6.76667	TRUE	TRUE	predict1211	predict12112
67.5	0.038429	-1.54821	-2.0369	8.34544	0.001389	53.0887	5.33472	OGTT	1.42499	6.48389	65.0431	M	24.2569	MZ	6.78333	TRUE	TRUE	predict1211	predict12112
81	0.095914	0.151786	-0.303571	3.32199	0.334722	44.6498	4.83472	UK Average	1.06577	0.477222	65.0431	M	24.2569	MZ	6.81667	TRUE	FALSE	predict1211	predict12112
92.5	0.055651	0.926786	0.746429	4.36208	1.16806	58.8769	5.50139	OGTT	1.23447	1.43222	65.0431	M	24.2569	MZ	6.83333	TRUE	FALSE	predict1211	predict12112
84.75	-0.020089	-0.400992	-0.620238	3.79294	0.668056	31.6258	10.0014	High Protein	0.632746	0.858889	65.0431	M	24.2569	MZ	6.86667	TRUE	FALSE	predict1211	predict12112
88	-0.035383	0.867064	0.296429	6.19366	2.00139	65.9142	6.50139	High Fibre	1.12613	0.595	65.0431	M	24.2569	MZ	6.9	TRUE	FALSE	predict1211	predict12112
64.7778	-0.159204	0.864286	-1.05357	4.73089	0.501389	43.1264	9.16806	High Protein	0.653936	0.991944	65.0431	M	24.2569	MZ	6.91667	TRUE	FALSE	predict1211	predict12112
75.5	0.001775	-0.565706	-0.241026	8.64687	0.001389	43.6924	7.00139	MCB	1.05769	0.478889	56.7748	M	27.3785	MZ	6.31667	FALSE	FALSE	predict1259	predict12592
75.3333	-0.029957	0.350961	1.00897	10.2558	2.83472	28.4247	7.33472	OGTT	1.58547	1.13417	56.7748	M	27.3785	MZ	6.2	FALSE	TRUE	predict1259	predict12592
36	-0.001991	0.125961	0.275641	15.6036	0.001389	28.4769	9.16806	OGTT	1.31651	0.312222	56.7748	M	27.3785	MZ	6.16667	FALSE	TRUE	predict1259	predict12592
66.6667	0.058692	-0.000428	-0.241026	18.6186	0.001389	65.2613	8.50139	UK Average	1.18623	0.376111	56.7748	M	27.3785	MZ	6.13333	FALSE	FALSE	predict1259	predict12592
78.5	0.010961	-0.367094	-0.224359	14.5147	0.001389	83.6495	10.6681	UK Average	1.12739	0.299444	56.7748	M	27.3785	MZ	6.1	FALSE	FALSE	predict1259	predict12592
79	0.005529	0.467628	-0.674359	14.2549	0.168056	54.9464	7.00139	High Protein	0.752628	0.874722	56.7748	M	27.3785	MZ	6.05	FALSE	FALSE	predict1259	predict12592
70.3333	0.013101	0.546794	-0.324359	5.93133	-6.66528	55.4605	7.16806	High Fat	0.849797	0.336944	56.7748	M	27.3785	MZ	6.01667	FALSE	FALSE	predict1259	predict12592
100	-0.032477	0.240873	0.845238	3.5478	1.83472	37.114	7.83472	High Fat	0.897179	0.456389	63.1841	M	27.9559	MZ	6.38333	TRUE	TRUE	predict1265	predict12651
56	0.008484	-0.493849	-0.971429	3.73764	1.00139	31.4691	10.6681	High Carb	1.19948	1.60778	63.1841	M	27.9559	MZ	6.45	TRUE	FALSE	predict1265	predict12651
93	0.024904	-1.04246	0.428571	1.99568	0.001389	29.3868	7.50139	UK Average	1.22946	1.00111	63.1841	M	27.9559	MZ	6.5	TRUE	FALSE	predict1265	predict12651
39.5	-0.030541	-0.125793	0.295238	3.11377	1.00139	38.9336	10.3347	OGTT	1.73863	0.0394444	63.1841	M	27.9559	MZ	6.51667	TRUE	FALSE	predict1265	predict12651
78	0.013252	0.393651	0.795238	2.54356	2.50139	46.2176	10.5014	UK Average	1.03533	1.28167	63.1841	M	27.9559	MZ	6.55	TRUE	FALSE	predict1265	predict12651
74	0.04336	-1.06052	-0.838095	5.06106	0.501389	37.5069	11.1681	High Protein	0.88791	0.753056	63.1841	M	27.9559	MZ	6.6	TRUE	TRUE	predict1265	predict12651
74.5	-0.024176	0.183929	-0.138095	3.52433	1.33472	45.5461	11.3347	High Fibre	1.11477	1.33806	63.1841	M	27.9559	MZ	6.63333	TRUE	FALSE	predict1265	predict12651
57	-0.015656	-0.569444	-1.06282	3.1838	4.00139	48.3572	13.8347	High Fat	0.756923	0.876111	43.154	F	25.4077	MZ	6.91667	TRUE	FALSE	predict1301	predict13011
63.3333	-0.059232	0.072222	1.12051	4.42513	2.83472	41.3355	10.8347	High Carb	1.27086	0.5425	43.154	F	25.4077	MZ	6.95	TRUE	TRUE	predict1301	predict13011
40.25	0.086144	-1.56111	-0.679487	3.62389	4.33472	37.8444	8.50139	High Carb	1.13817	0.183611	43.154	F	25.4077	MZ	6.98333	TRUE	TRUE	predict1301	predict13011
65.5	-0.099275	0.004167	0.987179	6.18211	1.83472	65.9011	13.3347	UK Average	0.687315	0.215278	43.154	F	25.4077	MZ	7	TRUE	FALSE	predict1301	predict13011
48	0.061129	-1.49306	-1.04615	3.11734	1.66806	44.3215	11.8347	UK Average	0	0.428056	43.154	F	25.4077	MZ	7.03333	TRUE	FALSE	predict1301	predict13011
59	-0.072051	0.677778	-0.346154	5.49296	4.00139	32.6856	9.00139	OGTT	0.712467	-3.335	43.154	F	25.4077	MZ	7.05	TRUE	FALSE	predict1301	predict13011
68	0.037446	0.228869	0.936905	2.40143	1.83472	19.7308	10.1681	High Fat	0.684588	1.24417	43.154	F	24.3215	MZ	6.9	TRUE	FALSE	predict1301	predict13012
38.5	0.020284	-0.428076	-0.329762	1.77252	3.00139	52.3924	9.83472	High Fat	0.686396	0.240556	43.154	F	24.3215	MZ	6.91667	TRUE	FALSE	predict1301	predict13012
48	-0.011829	1.45803	1.02024	2.21573	4.66806	24.9054	10.1681	High Carb	0.967974	0.370556	43.154	F	24.3215	MZ	6.95	TRUE	TRUE	predict1301	predict13012
62.5	-0.024347	0.469146	0.620238	2.73865	2.00139	41.6027	9.00139	High Carb	1.12359	0.305278	43.154	F	24.3215	MZ	6.98333	TRUE	TRUE	predict1301	predict13012
67.6667	0.03966	-3.18641	-1.99643	1.97091	3.66806	46.9348	12.3347	UK Average	1.05236	1.24889	43.154	F	24.3215	MZ	7	TRUE	FALSE	predict1301	predict13012
58	-0.00974	1.98859	-0.229762	2.33902	1.66806	38.4182	10.5014	UK Average	1.06482	0.258611	43.154	F	24.3215	MZ	7.03333	TRUE	FALSE	predict1301	predict13012
39	0.030652	-0.415576	0.603571	2.06009	0.668056	21.6392	9.50139	OGTT	1.3798	-1.79944	43.154	F	24.3215	MZ	7.08333	TRUE	FALSE	predict1301	predict13012
54	0.013196	-0.300298	-1.36309	2.028	3.00139	39.8939	12.1681	High Protein	0.663593	0.8725	43.154	F	24.3215	MZ	7.11667	TRUE	FALSE	predict1301	predict13012
54.3333	-0.088883	-0.757243	-0.996429	3.48345	4.50139	27.4421	10.3347	High Protein	0.67416	1.43944	43.154	F	24.3215	MZ	7.13333	TRUE	TRUE	predict1301	predict13012
26.5	0.013197	-1.22302	-0.342857	4.0199	1.50139	25.2982	8.33472	High Carb	0.379928	3.05556	35.551	M	22.3386	MZ	7	FALSE	FALSE	predict1310	predict13101
38	-0.060795	-2.10774	0.390476	3.90654	2.16806	46.9406	10.5014	OGTT	0.98852	1.72278	35.551	M	22.3386	MZ	6.93333	FALSE	TRUE	predict1310	predict13101
26.6667	0.026458	-0.010516	-0.492857	4.71233	0.668056	26.7742	11.5014	MCB	0.89349	2.41083	35.551	M	22.3386	MZ	6.9	FALSE	FALSE	predict1310	predict13101
26.3333	-0.068327	0.051984	-0.142857	5.002	0.501389	21.2442	7.83472	UK Average	0.985109	2.32306	35.551	M	22.3386	MZ	6.86667	FALSE	FALSE	predict1310	predict13101
20	0.028428	-0.473016	-1.05952	4.00456	0.501389	28.5576	12.6681	OGTT	1.24855	3.085	35.551	M	22.3386	MZ	6.83333	FALSE	FALSE	predict1310	predict13101
17	0.031243	-0.274404	-1.36667	1.66766	1.16806	17.2765	11.0014	OGTT	1.29072	1.96222	35.551	M	23.998	MZ	6.9	FALSE	FALSE	predict1310	predict13102
33	0.012535	-1.18829	-1.11667	3.68691	1.66806	27.8889	11.5014	OGTT	1.50496	1.29417	35.551	M	23.998	MZ	6.86667	FALSE	FALSE	predict1310	predict13102
45.75	-0.027301	0.785318	-0.933333	5.00734	1.00139	23.0298	9.50139	High Fibre	0.803558	0.808333	35.551	M	23.998	MZ	6.83333	FALSE	FALSE	predict1310	predict13102
47.25	0.0487	-2.19385	-1	3.51104	1.66806	25.0422	13.8347	High Protein	0.737247	1.31222	35.551	M	23.998	MZ	6.8	FALSE	FALSE	predict1310	predict13102
49	-0.031663	-0.666071	0.35	4.94074	0.834722	31.2349	10.0014	High Fat	0.605228	-0.187222	35.551	M	23.998	MZ	6.76667	FALSE	FALSE	predict1310	predict13102
83	-0.039133	0.911218	0.929487	1.99199	0.001389	49.1846	5.66806	High Fat	0.788022	-0.243611	51.1841	M	29.5015	MZ	6.38333	TRUE	TRUE	predict1357	predict13572
95	0.026298	0.47094	0.446154	3.71682	1.00139	53.5532	7.16806	High Carb	1.31612	0.797222	51.1841	M	29.5015	MZ	6.41667	TRUE	TRUE	predict1357	predict13572
89	-0.078029	-0.448504	-0.070513	3.78367	0.168056	37.224	6.83472	High Carb	1.08937	1.03611	51.1841	M	29.5015	MZ	6.45	TRUE	FALSE	predict1357	predict13572
91.3333	0.032217	0.562607	-0.287179	2.75331	0.168056	41.7948	6.50139	UK Average	0.956672	0.367778	51.1841	M	29.5015	MZ	6.46667	TRUE	FALSE	predict1357	predict13572
97	0.002672	-1.09156	-0.387179	4.19207	0.501389	36.9336	7.00139	UK Average	0.712746	2.02139	51.1841	M	29.5015	MZ	6.51667	TRUE	FALSE	predict1357	predict13572
96	0.0311	-1.41378	-1.68718	3.26737	0.001389	35.5153	8.16806	High Protein	1.3392	0.935556	51.1841	M	29.5015	MZ	6.56667	TRUE	TRUE	predict1357	predict13572
95.5	0.004029	1.72094	1.27949	1.74883	0.001389	42.2344	6.16806	High Fibre	1.38026	0.248333	51.1841	M	29.5015	MZ	6.6	TRUE	TRUE	predict1357	predict13572
96	0.001497	-0.91656	-1.08718	3.78241	0.001389	27.5843	7.33472	High Protein	0.845707	0.367222	51.1841	M	29.5015	MZ	6.63333	TRUE	FALSE	predict1357	predict13572
76.5	0.018264	-0.305059	-0.428571	2.33565	0.001389	30.9056	10.6681	High Fat	0.894042	1.25917	62.412	M	24.6249	MZ	6.88333	FALSE	FALSE	predict1362	predict13621
90.3333	-0.016912	-1.00367	-0.495238	3.68623	2.00139	156.808	7.33472	High Carb	1.22491	1.13611	62.412	M	24.6249	MZ	6.91667	FALSE	FALSE	predict1362	predict13621
85.3333	0.004784	0.49633	0.121429	2.15114	0.001389	63.469	7.50139	UK Average	0.759597	0.518889	62.412	M	24.6249	MZ	7	FALSE	FALSE	predict1362	predict13621
66	0.018405	-0.362004	-0.411905	1.93061	1.33472	118.725	9.33472	UK Average	1.01407	0.446111	62.412	M	24.6249	MZ	7.03333	FALSE	FALSE	predict1362	predict13621
55.75	0.004174	0.204663	-0.111905	4.58364	1.50139	110.452	8.16806	OGTT	1.24966	-0.676944	62.412	M	24.6249	MZ	7.06667	FALSE	FALSE	predict1362	predict13621
76	-0.017675	0.026885	0.771429	4.87789	1.00139	30.4747	7.50139	High Protein	0.703729	0.261944	62.412	M	24.6249	MZ	7.08333	FALSE	FALSE	predict1362	predict13621
81	0.027282	0.500496	0.121429	1.7933	0.334722	27.8349	8.33472	High Protein	0.613053	0.352778	62.412	M	24.6249	MZ	7.11667	FALSE	FALSE	predict1362	predict13621
72	0.026798	-1.13631	-1.28333	3.44488	0.501389	26.6457	9.16806	High Carb	1.32572	0.409444	62.2642	M	25.2011	MZ	6.45	TRUE	FALSE	predict1362	predict13622
59.3333	0.034393	-1.97242	-2.05	2.72434	0.668056	22.3865	7.16806	UK Average	1.49917	0.206111	62.2642	M	25.2011	MZ	6.46667	TRUE	FALSE	predict1362	predict13622
81.3333	-0.04076	1.71786	1.48333	3.59409	3.16806	35.4208	6.50139	UK Average	0.965005	-0.957222	62.2642	M	25.2011	MZ	6.5	TRUE	FALSE	predict1362	predict13622
78.5	-0.057885	0.887302	0.916667	3.75654	0.834722	31.1325	12.5014	OGTT	1.68683	-2.57694	62.2642	M	25.2011	MZ	6.51667	TRUE	FALSE	predict1362	predict13622
93.6667	0.023562	0.147024	0.3	2.49639	3.00139	24.8	13.0014	High Protein	0.827837	0.135	62.2642	M	25.2011	MZ	6.6	TRUE	TRUE	predict1362	predict13622
79	0.033747	0.105358	0.3	1.78296	2.50139	23.7141	9.33472	High Fibre	0.92663	0.0825	62.2642	M	25.2011	MZ	6.63333	TRUE	FALSE	predict1362	predict13622
56.6667	0.076396	-1.05992	-0.797619	6.37241	0.001389	22.6367	12.1681	MCB	0.863986	0.385833	21.6893	F	24.169	DZ	8.03333	FALSE	FALSE	predict1372	predict13721
56	-0.044838	0.041468	-0.197619	4.40106	0.668056	33.6173	10.5014	High Carb	1.13519	0.276111	21.6893	F	24.169	DZ	8.03333	FALSE	FALSE	predict1372	predict13721
64.3333	-0.012589	-1.39186	-1.39762	4.04645	0.834722	25.4093	11.8347	High Carb	0.94132	0.3025	21.6893	F	24.169	DZ	8.01667	FALSE	TRUE	predict1372	predict13721
65	-0.070226	0.753968	2.85238	6.73253	1.33472	61.1136	13.5014	UK Average	0.84373	0.142778	21.6893	F	24.169	DZ	8	FALSE	TRUE	predict1372	predict13721
57.5	0.031925	0.117857	0.469048	7.66026	0.168056	21.0095	11.5014	UK Average	0.918318	0.421111	21.6893	F	24.169	DZ	8	FALSE	FALSE	predict1372	predict13721
73.5	0.001815	0.753968	-0.147619	3.55107	0.668056	49.297	10.5014	OGTT	1.24989	1.96472	21.6893	F	24.169	DZ	7.98333	FALSE	FALSE	predict1372	predict13721
60	0.061584	-0.454365	-1.54762	4.54152	0.168056	35.3639	8.66806	OGTT	1.11485	3.1075	21.6893	F	24.169	DZ	7.96667	FALSE	FALSE	predict1372	predict13721
55.3333	0.033782	0.498413	0.285714	4.13255	0.834722	29.2917	9.16806	High Fat	0.381084	1.56806	21.6893	F	24.169	DZ	7.95	FALSE	FALSE	predict1372	predict13721
60.5	0.006926	-1.34881	-1.41429	2.64026	0.501389	55.1104	11.5014	High Protein	0.709031	0.770556	21.6893	F	24.169	DZ	7.93333	FALSE	FALSE	predict1372	predict13721
79.25	-0.008447	-0.023611	-0.140476	1.49959	2.66806	25.9114	13.0014	MCB	0.706565	1.51389	21.7084	M	30.8199	DZ	7.95	FALSE	FALSE	predict1372	predict13722
68.5	0.063087	-1.81111	-1.00714	1.37936	1.50139	37.4281	10.5014	High Carb	0.958973	2.65583	21.7084	M	30.8199	DZ	7.93333	FALSE	FALSE	predict1372	predict13722
61.6667	0.02036	1.85556	1.77619	0.863055	0.834722	43.3314	11.1681	High Carb	0.888504	0.933611	21.7084	M	30.8199	DZ	7.91667	FALSE	TRUE	predict1372	predict13722
71.25	-0.002766	-0.480555	1.84286	1.00602	3.16806	33.0193	13.8347	UK Average	0.901406	1.59889	21.7084	M	30.8199	DZ	7.9	FALSE	TRUE	predict1372	predict13722
80	0.008301	-0.713888	0.409524	3.15813	4.83472	19.2894	0.001389	OGTT	1.0508	1.07389	21.7084	M	30.8199	DZ	7.88333	FALSE	FALSE	predict1372	predict13722
87	0.066101	0.156944	-0.907143	0.837865	0.168056	25.2302	10.6681	OGTT	0.94461	1.40694	21.7084	M	30.8199	DZ	7.86667	FALSE	FALSE	predict1372	predict13722
60	-0.025173	0.184723	0.459524	1.52512	1.16806	42.9587	9.83472	UK Average	0.788697	0.347222	21.7084	M	30.8199	DZ	7.85	FALSE	FALSE	predict1372	predict13722
89	-0.048829	-0.193055	-0.090476	2.86666	1.00139	24.0492	10.3347	High Protein	0.441963	0.6625	21.7084	M	30.8199	DZ	7.83333	FALSE	FALSE	predict1372	predict13722
75.6667	0.011172	-1.11945	-2.00714	2.62125	2.50139	33.5026	10.3347	High Fibre	0.903918	3.35833	21.7084	M	30.8199	DZ	7.8	FALSE	FALSE	predict1372	predict13722
64.5	-0.027257	0.290278	0.17619	0.518574	1.16806	22.7547	9.00139	High Fat	0.735821	0.790278	21.7084	M	30.8199	DZ	7.78333	FALSE	TRUE	predict1372	predict13722
82	0.020653	0.16746	-0.291667	4.09241	1.16806	28.7536	8.66806	High Fat	0.891517	2.42139	64.794	M	24.2559	MZ	6.68333	TRUE	FALSE	predict1379	predict13791
86.5	-0.107295	-1.42004	-1.65833	5.74899	0.001389	31.3684	6.66806	High Carb	1.10744	3.84556	64.794	M	24.2559	MZ	6.7	TRUE	FALSE	predict1379	predict13791
72.5	0.034382	-0.299207	-0.691667	22.9701	-7.33194	32.1332	5.33472	High Carb	1.31019	3.38389	64.794	M	24.2559	MZ	6.73333	TRUE	FALSE	predict1379	predict13791
75.5	-0.047429	-0.625596	0.175	8.01481	-0.5	33.4545	7.83472	UK Average	1.02919	2.37	64.794	M	24.2559	MZ	6.76667	TRUE	TRUE	predict1379	predict13791
82.5	-0.038626	1.81468	1.875	21.3479	-5.16528	26.3398	10.3333	UK Average	0.978213	0.385	64.794	M	24.2559	MZ	6.78333	TRUE	TRUE	predict1379	predict13791
81.5	-0.010831	-2.01171	-1.04167	22.1679	-5.16528	36.4317	10.0014	OGTT	1.09425	2.58583	64.794	M	24.2559	MZ	6.81667	TRUE	FALSE	predict1379	predict13791
82.5	0.012062	0.263293	-0.308333	21.1281	-5.33194	31.2771	7.66806	OGTT	0.956429	1.72861	64.794	M	24.2559	MZ	6.83333	TRUE	FALSE	predict1379	predict13791
65.5	0.029241	0.038293	-0.291667	20.2606	0.168056	31.9859	6.16806	High Protein	0.69241	2.08167	64.794	M	24.2559	MZ	6.86667	TRUE	FALSE	predict1379	predict13791
81.3333	0.072118	-3.39504	-1.725	20.2701	-5.33194	39.6259	7.50139	High Protein	0.934949	3.86472	64.794	M	24.2559	MZ	6.9	TRUE	FALSE	predict1379	predict13791
59.5	0.031793	-0.45	-0.327381	4.97514	1.33472	25.541	12.0014	High Fat	0.905508	1.21556	50.6229	F	33.0317	DZ	7.45	TRUE	FALSE	predict1425	predict14251
59.5	0.04358	-0.452777	-0.160714	1.92227	1.33472	25.214	12.1681	High Carb	1.06293	0.86	50.6229	F	33.0317	DZ	7.48333	TRUE	FALSE	predict1425	predict14251
70.25	-0.015201	-0.5375	-0.127381	2.50794	1.16806	36.5198	12.5014	High Carb	1.20753	1.08806	50.6229	F	33.0317	DZ	7.5	TRUE	FALSE	predict1425	predict14251
59	0.001356	2.38889	0.472619	2.19345	0.168056	44.6045	11.6681	UK Average	0.913386	0.578333	50.6229	F	33.0317	DZ	7.56667	TRUE	TRUE	predict1425	predict14251
54.75	0.022179	-0.894444	-0.677381	3.36307	2.50139	32.1293	11.1681	OGTT	1.46052	1.05278	50.6229	F	33.0317	DZ	7.58333	TRUE	FALSE	predict1425	predict14251
55	0.032847	-0.586111	-0.327381	1.67704	0.501389	29.2226	11.0014	UK Average	0.85464	0.739167	50.6229	F	33.0317	DZ	7.61667	TRUE	FALSE	predict1425	predict14251
64.5	0.056722	-0.331944	-0.194048	0.897978	0.001389	33.2323	12.0014	High Protein	0.532592	0.65	50.6229	F	33.0317	DZ	7.65	TRUE	FALSE	predict1425	predict14251
35	-0.055697	-0.240277	-0.210714	3.08731	2.66806	32.9415	10.3347	High Fibre	1.3096	0.7825	50.6229	F	33.0317	DZ	7.68333	TRUE	FALSE	predict1425	predict14251
60	-0.046488	-1.23056	-0.310714	1.49377	2.33472	38.9927	10.6681	High Protein	0.537359	0.826944	50.6229	F	33.0317	DZ	7.7	TRUE	FALSE	predict1425	predict14251
65	0.005084	-2.41528	-2.05238	3.03037	1.00139	28.9288	10.0014	High Fat	0.824902	2.70611	50.6229	F	40.8249	DZ	7.45	TRUE	FALSE	predict1425	predict14252
77	0.014037	-0.569445	-1.55238	2.62794	0.334722	27.5905	10.8347	High Carb	1.15816	2.205	50.6229	F	40.8249	DZ	7.48333	TRUE	FALSE	predict1425	predict14252
47.75	-0.013956	0.359722	-1.13571	4.1171	0.168056	32.4923	6.50139	High Carb	1.12387	1.71444	50.6229	F	40.8249	DZ	7.5	TRUE	FALSE	predict1425	predict14252
60.25	0.059265	-0.630556	1.29762	5.1127	4.00139	40.9978	8.33472	OGTT	1.5214	0.600278	50.6229	F	40.8249	DZ	7.53333	TRUE	TRUE	predict1425	predict14252
74.4	0.013787	1.825	2.21429	5.95995	2.66806	44.1578	9.33472	UK Average	1.22928	0.339444	50.6229	F	40.8249	DZ	7.56667	TRUE	TRUE	predict1425	predict14252
71.6667	0.043469	-1.8375	-2.28571	5.55114	0.001389	45.9407	11.1681	UK Average	0.905011	1.77833	50.6229	F	40.8249	DZ	7.58333	TRUE	FALSE	predict1425	predict14252
75.3333	0.011667	-0.786111	-2.21905	6.86433	1.16806	31.0132	9.66806	OGTT	1.36445	0.782222	50.6229	F	40.8249	DZ	7.61667	TRUE	FALSE	predict1425	predict14252
67	0.011912	2.06111	1.56429	3.70157	2.66806	29.3639	11.6681	High Protein	0.882471	0.326667	50.6229	F	40.8249	DZ	7.65	TRUE	FALSE	predict1425	predict14252
73.6667	0.027179	-1.64167	-2.03571	3.51331	0.834722	52.5459	9.50139	High Fibre	1.18368	1.60639	50.6229	F	40.8249	DZ	7.68333	TRUE	FALSE	predict1425	predict14252
59	-0.034326	0.143055	0.030952	3.27887	1.50139	33.585	9.83472	High Protein	0.792047	0.240278	50.6229	F	40.8249	DZ	7.7	TRUE	FALSE	predict1425	predict14252
96.5	0.067281	-0.534524	0.584524	2.94631	0.668056	49.3464	10.0014	High Fat	0.682396	2.27361	57.6701	F	19.2064	DZ	7.13333	TRUE	TRUE	predict1432	predict14321
79.5	0.01744	-0.355357	0.817857	3.47264	2.66806	69.3703	9.50139	High Carb	1.47311	4.0375	57.6701	F	19.2064	DZ	7.16667	TRUE	TRUE	predict1432	predict14321
88.6667	0.008803	-1.4248	-0.665476	4.73747	1.66806	66.206	10.0014	High Carb	1.48787	5.79472	57.6701	F	19.2064	DZ	7.2	TRUE	FALSE	predict1432	predict14321
85	-0.042742	-0.460913	-0.39881	2.07263	1.16806	50.3133	9.50139	UK Average	0.902276	3.77778	57.6701	F	19.2064	DZ	7.21667	TRUE	FALSE	predict1432	predict14321
72.5	0.025498	-0.367857	-0.59881	1.05523	0.001389	67.8857	9.83472	UK Average	1.43901	4.46972	57.6701	F	19.2064	DZ	7.25	TRUE	FALSE	predict1432	predict14321
66.25	-0.189935	2.49325	-0.29881	3.48046	1.50139	71.0401	7.50139	OGTT	1.54966	0.0975	57.6701	F	19.2064	DZ	7.28333	TRUE	FALSE	predict1432	predict14321
59.3333	0.013977	-0.431746	-0.265476	5.75255	0.001389	64.2514	9.16806	OGTT	1.10078	-1.27639	57.6701	F	19.2064	DZ	7.3	TRUE	FALSE	predict1432	predict14321
93	0.033611	-0.022024	0.117857	1.30954	1.50139	56.7348	10.8347	High Protein	1.2121	4.11389	57.6701	F	19.2064	DZ	7.33333	TRUE	TRUE	predict1432	predict14321
85.5	0.087198	0.573809	2.26786	3.52337	4.66806	63.8787	9.00139	High Protein	1.33716	2.88056	57.6701	F	19.2064	DZ	7.36667	TRUE	TRUE	predict1432	predict14321
87	-0.004758	-0.563691	-0.39881	3.0988	0.001389	35.8302	9.83472	High Fibre	1.21917	3.04583	57.6701	F	19.2064	DZ	7.38333	TRUE	FALSE	predict1432	predict14321
60.25	0.050817	1.0126	1.80476	2.42295	4.16806	40.4392	12.8347	High Fat	1.0128	0.741944	57.6701	F	22.8723	DZ	7.13333	TRUE	TRUE	predict1432	predict14322
43	0.035271	-1.43601	-0.311905	4.15819	0.668056	110.998	10.1681	High Carb	0.53256	0.813889	57.6701	F	22.8723	DZ	7.16667	TRUE	TRUE	predict1432	predict14322
59.3333	0.000464	-1.49157	-1.56191	6.44749	1.00139	149.893	9.00139	High Carb	0.875056	0.689444	57.6701	F	22.8723	DZ	7.2	TRUE	FALSE	predict1432	predict14322
40.3333	-0.020814	0.630655	0.288095	6.46231	1.00139	31.2772	11.8347	OGTT	1.18465	-1.41167	57.6701	F	22.8723	DZ	7.21667	TRUE	FALSE	predict1432	predict14322
63	0.08008	-0.847123	-1.79524	8.72482	0.168056	122.408	8.66806	UK Average	0.804593	0.548333	57.6701	F	22.8723	DZ	7.25	TRUE	FALSE	predict1432	predict14322
47	-0.087839	4.24038	3.52143	3.89041	1.00139	45.2098	10.3347	UK Average	1.46915	-1.19389	57.6701	F	22.8723	DZ	7.3	TRUE	FALSE	predict1432	predict14322
66.25	-0.025516	0.434822	-0.111905	5.42417	1.33472	46.1167	9.33472	High Protein	0.837234	1.67222	57.6701	F	22.8723	DZ	7.33333	TRUE	TRUE	predict1432	predict14322
65.5	-0.032152	-2.19018	-0.728571	3.8771	0.668056	321.514	8.33472	High Protein	0.779402	0.838611	57.6701	F	22.8723	DZ	7.38333	TRUE	FALSE	predict1432	predict14322
66	-0.05	0.948908	-0.417857	3.58909	0.668056	23.7529	8.33472	MCB	0.710189	1.03778	23.4634	M	31.0421	MZ	7.91667	FALSE	TRUE	predict1463	predict14631
72.6667	0.048275	-0.023314	0.115476	2.36232	0.001389	31.8771	8.16806	High Carb	1.0631	0.548611	23.4634	M	31.0421	MZ	7.9	FALSE	TRUE	predict1463	predict14631
39	0.049537	-1.9497	-1.85119	2.78282	1.16806	20.9483	9.16806	High Carb	0.856884	0.383333	23.4634	M	31.0421	MZ	7.88333	FALSE	FALSE	predict1463	predict14631
48.5	0.016364	0.230853	0.315476	3.54281	0.001389	18.6474	6.33472	OGTT	1.38797	0.111389	23.4634	M	31.0421	MZ	7.86667	FALSE	FALSE	predict1463	predict14631
63.5	-0.034144	0.828075	0.582143	6.10517	2.00139	27.6283	11.3347	UK Average	0.664865	0.139167	23.4634	M	31.0421	MZ	7.85	FALSE	FALSE	predict1463	predict14631
50.75	0.022001	-2.31776	-1.01786	4.30459	1.16806	19.7601	8.66806	OGTT	1.0623	0.6725	23.4634	M	31.0421	MZ	7.83333	FALSE	FALSE	predict1463	predict14631
54	0.00639	0.146131	0.34881	5.1615	0.168056	37.1828	12.1681	UK Average	0.728017	0.580556	23.4634	M	31.0421	MZ	7.8	FALSE	FALSE	predict1463	predict14631
65	-0.109499	1.77669	-0.717857	3.80925	1.66806	32.3124	8.83472	High Fat	0.63379	0.548889	23.4634	M	31.0421	MZ	7.78333	FALSE	TRUE	predict1463	predict14631
80.3333	0.035492	-0.588592	-0.20119	3.50658	2.00139	24.9003	9.00139	High Fibre	0.793223	1.10417	23.4634	M	31.0421	MZ	7.76667	FALSE	TRUE	predict1463	predict14631
34.5	0.039604	-1.63998	-1.20119	3.76749	1.00139	40.635	9.50139	High Protein	0.822106	0.358611	23.4634	M	31.0421	MZ	7.73333	FALSE	FALSE	predict1463	predict14631
59	0.019481	0.735715	0.40119	2.98372	0.334722	32.875	9.50139	MCB	0.827018	0.354167	23.4634	M	28.8937	MZ	7.91667	FALSE	TRUE	predict1463	predict14632
54	0.029023	0.398215	0.234524	4.94996	2.66806	35.2814	10.8347	High Carb	0.949593	0.311111	23.4634	M	28.8937	MZ	7.9	FALSE	TRUE	predict1463	predict14632
69.6667	-0.023943	-0.547619	-0.265476	1.62537	0.168056	31.1325	8.83472	High Carb	1.02273	1.63639	23.4634	M	28.8937	MZ	7.88333	FALSE	FALSE	predict1463	predict14632
44.75	0.01908	-0.43373	-0.465476	4.22074	0.168056	22.5201	7.66806	UK Average	0.715166	0.804444	23.4634	M	28.8937	MZ	7.86667	FALSE	FALSE	predict1463	predict14632
44.3333	-0.012915	-0.899008	-0.49881	4.04797	0.834722	19.8834	13.0014	OGTT	1.30903	0.377778	23.4634	M	28.8937	MZ	7.85	FALSE	FALSE	predict1463	predict14632
39	0.014073	-0.643452	-0.632143	4.11271	0.001389	23.5839	11.6681	OGTT	1.0824	0.901667	23.4634	M	28.8937	MZ	7.83333	FALSE	FALSE	predict1463	predict14632
55.25	-0.054169	-0.050397	-0.29881	5.25324	0.001389	33.0611	9.00139	UK Average	0.748349	0.444444	23.4634	M	28.8937	MZ	7.8	FALSE	FALSE	predict1463	predict14632
66	0.00638	0.335715	0.517857	1.36827	0.501389	29.9157	11.8347	High Fat	0.742321	0.154167	23.4634	M	28.8937	MZ	7.78333	FALSE	TRUE	predict1463	predict14632
49	-0.016936	0.631548	1.48452	3.60476	0.668056	26.8399	8.00139	High Fibre	0.700119	1.15444	23.4634	M	28.8937	MZ	7.76667	FALSE	TRUE	predict1463	predict14632
42.75	0.003076	0.292659	-0.465476	4.45453	1.83472	44.4927	9.83472	High Protein	0.845872	0.840278	23.4634	M	28.8937	MZ	7.73333	FALSE	FALSE	predict1463	predict14632
71.5	2e-06	-0.422421	0.561905	4.0825	0.834722	35.6947	8.50139	High Carb	1.12703	0.998611	51.5483	F	33.1237	NT	7.9	FALSE	TRUE	predict14638	predict14638
69.3333	-0.014121	-1.43353	-0.721429	4.93989	0.001389	31.1904	13.6681	High Carb	1.21074	0.225	51.5483	F	33.1237	NT	7.88333	FALSE	FALSE	predict14638	predict14638
67	0.042704	-1.24464	-0.538095	6.28234	0.001389	16.2061	9.00139	UK Average	0.993408	0.354167	51.5483	F	33.1237	NT	7.85	FALSE	FALSE	predict14638	predict14638
67	0.031394	0.094246	-0.638095	4.18654	0.501389	16.3637	9.83472	OGTT	1.07822	0.418056	51.5483	F	33.1237	NT	7.83333	FALSE	FALSE	predict14638	predict14638
70.75	0.018983	-0.76131	-0.571429	5.10068	1.66806	19.7278	9.66806	OGTT	1.3542	0.266667	51.5483	F	33.1237	NT	7.8	FALSE	FALSE	predict14638	predict14638
67.8	0.025808	-0.289088	0.411905	4.76595	2.66806	15.6434	9.66806	High Protein	0.883506	0.336111	51.5483	F	33.1237	NT	7.78333	FALSE	TRUE	predict14638	predict14638
70.6667	-0.006215	-0.180754	0.411905	4.83019	2.83472	23.1993	7.66806	High Fibre	0.9936	0.751389	51.5483	F	33.1237	NT	7.76667	FALSE	TRUE	predict14638	predict14638
45	0.033812	-0.46746	-0.410714	3.06125	0.834722	46.2103	7.83472	MCB	0.628772	2.25417	40.9582	F	23.2946	MZ	7.2	FALSE	TRUE	predict1492	predict14921
54.5	0.04598	-0.835516	-0.877381	3.93295	1.00139	56.3057	7.50139	High Carb	1.03686	2.32778	40.9582	F	23.2946	MZ	7.16667	FALSE	TRUE	predict1492	predict14921
67	-0.014026	0.771429	-0.060714	7.56296	0.001389	52.3496	7.33472	High Carb	0.889725	1.33056	40.9582	F	23.2946	MZ	7.13333	FALSE	FALSE	predict1492	predict14921
54	0.035431	1.03254	1.83929	4.37595	1.83472	48.1671	7.16806	UK Average	0.725911	0.201389	40.9582	F	23.2946	MZ	7.1	FALSE	FALSE	predict1492	predict14921
37.25	-0.111293	2.27143	2.23929	4.69709	0.501389	61.5602	8.33472	OGTT	1.12038	0.270833	40.9582	F	23.2946	MZ	7.06667	FALSE	FALSE	predict1492	predict14921
52.5	0.017778	-3.77996	-4.17738	3.14128	0.168056	23.5767	10.0014	UK Average	0.573709	5.94306	40.9582	F	23.2946	MZ	7.03333	FALSE	FALSE	predict1492	predict14921
27.5	-0.037599	1.16032	1.38929	4.90205	2.00139	57.646	8.50139	OGTT	1.17378	0.16	40.9582	F	23.2946	MZ	7	FALSE	FALSE	predict1492	predict14921
40.5	-0.012887	-0.09246	0.455952	7.51329	0.001389	51.925	9.16806	High Fibre	0.802326	0.591667	40.9582	F	23.2946	MZ	6.96667	FALSE	TRUE	predict1492	predict14921
51.5	0.012755	-1.18135	-1.44405	5.01138	0.834722	55.742	8.16806	High Protein	0.28439	3.39028	40.9582	F	23.2946	MZ	6.93333	FALSE	TRUE	predict1492	predict14921
43.75	0.017638	-0.349405	-0.277381	4.27175	1.83472	49.4543	8.83472	High Fat	0.228236	1.95583	40.9582	F	23.2946	MZ	6.9	FALSE	FALSE	predict1492	predict14921
69.5	-0.002436	1.11468	-0.334524	2.33884	1.16806	30.0999	7.00139	MCB	0.479939	0.786389	40.9582	F	22.7287	MZ	7.2	FALSE	TRUE	predict1492	predict14922
55.75	0.033671	-0.875595	0.165476	3.59284	1.66806	40.0702	9.16806	High Carb	0.717876	0.406944	40.9582	F	22.7287	MZ	7.16667	FALSE	TRUE	predict1492	predict14922
70.6667	0.027888	-0.27004	0.265476	1.45221	1.66806	47.7657	8.66806	High Carb	0.61208	0.258333	40.9582	F	22.7287	MZ	7.13333	FALSE	FALSE	predict1492	predict14922
48	-0.108504	-3.00476	-4.68452	1.66336	1.16806	47.6586	6.66806	OGTT	0.816031	5.96417	40.9582	F	22.7287	MZ	7.1	FALSE	FALSE	predict1492	predict14922
79	0.047447	0.663293	1.13214	8.43144	2.83333	43.8965	9.33472	UK Average	0.667643	0.376667	40.9582	F	22.7287	MZ	7.06667	FALSE	FALSE	predict1492	predict14922
50.2	-0.037018	0.384127	0.332143	3.86698	1.00139	30.7197	8	UK Average	0.631989	0.5375	40.9582	F	22.7287	MZ	7.03333	FALSE	FALSE	predict1492	predict14922
30	0.011671	0.457738	0.515476	3.4964	2.16806	47.0594	8.50139	OGTT	1.11929	0.301667	40.9582	F	22.7287	MZ	7	FALSE	FALSE	predict1492	predict14922
66.75	0.032363	0.26746	0.782143	3.34109	1.00139	51.4011	9.50139	High Fibre	0.596395	0.195833	40.9582	F	22.7287	MZ	6.96667	FALSE	TRUE	predict1492	predict14922
33.25	-0.022712	0.220238	0.865476	3.82639	0.001389	45.1201	7.66806	High Protein	0.653139	0.536389	40.9582	F	22.7287	MZ	6.93333	FALSE	TRUE	predict1492	predict14922
67	-0.00482	-0.375595	-0.567857	5.58681	1.00139	47.7033	11.3347	High Fat	0.532238	1.33056	40.9582	F	22.7287	MZ	6.9	FALSE	FALSE	predict1492	predict14922
60	0.045141	0.645337	1.54643	3.04958	2.83472	14.1207	10.0014	High Fat	0.54299	0.592222	55.0062	F	31.0158	MZ	8.08333	FALSE	FALSE	predict1546	predict15462
43	-0.001395	-1.29216	2.52976	3.19928	3.16806	20.4388	11.6681	MCB	0.12965	0.327778	55.0062	F	31.0158	MZ	8.08333	FALSE	TRUE	predict1546	predict15462
63.4	-0.0178	1.08978	0.813095	2.09809	1.50139	20.4521	8.16806	High Carb	1.23139	0.382778	55.0062	F	31.0158	MZ	8.06667	FALSE	FALSE	predict1546	predict15462
51	0.04171	-1.89355	-2.7869	1.92812	1.50139	25.6392	8.16806	UK Average	0.983439	3.9875	55.0062	F	31.0158	MZ	8.05	FALSE	FALSE	predict1546	predict15462
56	-0.08277	3.87589	1.02976	5.24109	-5.16528	25.3397	7.16806	UK Average	0.964715	0.348056	55.0062	F	31.0158	MZ	8.05	FALSE	FALSE	predict1546	predict15462
39	0.040529	-1.1755	-4.40357	5.63942	2.50139	26.5815	8.50139	OGTT	1.51173	5.69806	55.0062	F	31.0158	MZ	8.03333	FALSE	FALSE	predict1546	predict15462
35.5	0.042272	-0.178274	-3.70357	3.03923	2.00139	20.4187	8.16806	OGTT	1.31608	5.26056	55.0062	F	31.0158	MZ	8.03333	FALSE	FALSE	predict1546	predict15462
50	0.022959	-0.917163	1.7131	3.04937	3.50139	27.8285	11.3347	High Fibre	0.86877	0.482778	55.0062	F	31.0158	MZ	8.01667	FALSE	TRUE	predict1546	predict15462
50.5	0.036264	0.580059	3.17976	4.60738	1.16806	31.321	9.33472	High Fat	0.957006	0.532222	55.0062	F	31.0158	MZ	8	FALSE	TRUE	predict1546	predict15462
49.75	-0.00765	-2.47272	0.946429	3.91908	1.66806	20.9399	8.33472	High Protein	0.754869	0.962778	55.0062	F	31.0158	MZ	8	FALSE	FALSE	predict1546	predict15462
61.5	0.001296	0.748909	-0.814286	2.86845	0.001389	68.4206	7.50139	MCB	0.558466	1.58139	59.0828	F	24.6417	MZ	7.61667	FALSE	TRUE	predict1591	predict15911
64.5	-0.102684	1.39196	-0.197619	3.27004	1.50139	49.3877	8.00139	High Carb	1.00649	1.06694	59.0828	F	24.6417	MZ	7.58333	FALSE	TRUE	predict1591	predict15911
75.5	-0.058671	0.676686	-0.664286	5.25777	0.001389	70.0778	7.83472	High Carb	1.11606	2.54694	59.0828	F	24.6417	MZ	7.56667	FALSE	FALSE	predict1591	predict15911
76.3333	0.029447	-0.869147	-0.064286	2.64279	1.33472	52.347	7.33472	UK Average	1.28293	0.948333	59.0828	F	24.6417	MZ	7.53333	FALSE	FALSE	predict1591	predict15911
65	0.006873	-2.77887	1.81905	4.67776	3.16806	58.5729	10.6681	UK Average	0.886394	0.169444	59.0828	F	24.6417	MZ	7.5	FALSE	FALSE	predict1591	predict15911
74.3333	-0.015617	1.21141	0.035714	5.28345	0.834722	31.9857	9.50139	OGTT	0.942213	0.741667	59.0828	F	24.6417	MZ	7.48333	FALSE	FALSE	predict1591	predict15911
67.5	0.040269	-1.50665	0.185714	3.73646	1.33472	42.2608	8.00139	OGTT	1.05302	0.287222	59.0828	F	24.6417	MZ	7.45	FALSE	FALSE	predict1591	predict15911
37	-0.002737	-1.22748	0.119048	3.83437	2.66806	78.8007	8.00139	High Fibre	0.949202	0.231111	59.0828	F	24.6417	MZ	7.41667	FALSE	TRUE	predict1591	predict15911
36	0.024045	1.05307	0.235714	2.75226	2.00139	64.004	8.00139	High Protein	0.470488	0.310278	59.0828	F	24.6417	MZ	7.4	FALSE	TRUE	predict1591	predict15911
53.75	-0.020092	-1.03859	-2.28095	5.34649	0.001389	60.4763	8.00139	High Fat	0.681136	0.636111	59.0828	F	24.6417	MZ	7.36667	FALSE	FALSE	predict1591	predict15911
35	0.061226	-1.95694	-0.607143	4.10822	1.16806	56.4734	7.00139	MCB	0.586972	0.742222	59.0828	F	22.9334	MZ	7.61667	FALSE	TRUE	predict1591	predict15912
47	0.031012	0.943055	0.32619	2.5604	0.334722	43.1442	6.33472	High Carb	1.20029	1.1475	59.0828	F	22.9334	MZ	7.56667	FALSE	FALSE	predict1591	predict15912
49.3333	-0.037313	1.23333	0.409524	6.40879	0.001389	48.173	7.66806	UK Average	1.03984	0.3325	59.0828	F	22.9334	MZ	7.53333	FALSE	FALSE	predict1591	predict15912
53.3333	0.051129	-0.804167	-0.42381	3.36862	1.16806	49.3421	7.83472	UK Average	0.85927	0.561944	59.0828	F	22.9334	MZ	7.45	FALSE	FALSE	predict1591	predict15912
13	0.058461	-0.561112	-2.19048	4.55433	0.001389	51.7168	8.66806	High Protein	0.818283	2.70222	59.0828	F	22.9334	MZ	7.4	FALSE	TRUE	predict1591	predict15912
67	0.038328	-1.36339	-0.467857	2.23034	0.668056	31.9553	6.83472	MCB	0.436334	1.27194	43.9179	F	24.7426	MZ	7.65	FALSE	FALSE	predict1600	predict16001
75	0.015909	0.118551	1.14881	3.0975	1.50139	34.6431	11.0014	High Carb	1.11465	0.7575	43.9179	F	24.7426	MZ	7.61667	FALSE	TRUE	predict1600	predict16001
75.75	0.004447	1.04633	0.94881	2.99709	0.001389	46.3397	10.0014	High Carb	0.762187	0.648056	43.9179	F	24.7426	MZ	7.58333	FALSE	TRUE	predict1600	predict16001
64.1429	-0.001916	1.24216	-0.017857	5.17901	1.33472	58.2343	12.3347	OGTT	0.506356	0.354167	43.9179	F	24.7426	MZ	7.53333	FALSE	FALSE	predict1600	predict16001
36.5	-8.9e-05	-0.237004	-0.284524	7.19371	1.50139	28.0144	13.3347	OGTT	0.952066	0.206944	43.9179	F	24.7426	MZ	7.5	FALSE	FALSE	predict1600	predict16001
74.5	0.020442	-0.05506	0.082143	4.47869	2.16806	23.7222	13.6681	UK Average	0.726093	0.536944	43.9179	F	24.7426	MZ	7.48333	FALSE	FALSE	predict1600	predict16001
64.3333	-0.01291	0.499107	0.99881	1.92275	1.50139	29.0975	7.33472	High Protein	0.440309	0.225	43.9179	F	24.7426	MZ	7.45	FALSE	FALSE	predict1600	predict16001
55	0.007526	1.088	1.29881	2.95286	1.16806	36.4825	9.00139	High Fibre	0.698318	0.316389	43.9179	F	24.7426	MZ	7.41667	FALSE	TRUE	predict1600	predict16001
56	-0.045952	2.71855	2.64881	2.27449	0.834722	40.9184	9.33472	High Fat	0.649615	-2.11306	43.9179	F	24.7426	MZ	7.4	FALSE	TRUE	predict1600	predict16001
80.3333	-0.028663	0.322222	-0.207143	2.47426	1.33472	32.8751	11.0014	High Carb	0.831985	1.31806	65.1444	F	25.2738	MZ	7.78333	FALSE	TRUE	predict1633	predict16331
76.6667	0.017319	-1.87917	-1.84048	3.58501	1.83472	29.3057	8.83472	High Carb	1.17896	2.4825	65.1444	F	25.2738	MZ	7.76667	FALSE	TRUE	predict1633	predict16331
55	0.012991	0.709722	1.29286	1.6003	2.83472	35.3174	8.33472	UK Average	0.957018	0.8975	65.1444	F	25.2738	MZ	7.73333	FALSE	FALSE	predict1633	predict16331
71	0.028415	-0.320833	-0.940476	4.10262	2.16806	32.1474	9.50139	UK Average	1.06054	1.24944	65.1444	F	25.2738	MZ	7.71667	FALSE	FALSE	predict1633	predict16331
53	-0.059843	-0.988889	-0.42381	4.59118	1.16806	32.9281	8.33472	OGTT	1.03419	0.240833	65.1444	F	25.2738	MZ	7.7	FALSE	FALSE	predict1633	predict16331
59.3333	-0.019268	0.308333	-0.07381	4.21691	0.668056	26.8615	7.66806	OGTT	1.25307	0.138889	65.1444	F	25.2738	MZ	7.66667	FALSE	FALSE	predict1633	predict16331
66.75	-0.006582	-0.2375	0.87619	3.64722	3.16806	34.5139	12.0014	High Fat	0.796726	0.261944	65.1444	F	25.2738	MZ	7.65	FALSE	FALSE	predict1633	predict16331
58	0.02913	1.63056	1.25952	3.46131	2.66806	24.6647	12.5014	High Protein	0.746513	0.393056	65.1444	F	25.2738	MZ	7.61667	FALSE	TRUE	predict1633	predict16331
77.5	-0.039104	-0.777778	-0.207143	3.9051	1.83472	27.9253	13.8347	High Fibre	1.17149	1.55694	65.1444	F	25.2738	MZ	7.58333	FALSE	TRUE	predict1633	predict16331
85	-0.022533	0.552778	0.802381	7.42473	3.50139	23.3615	8.83472	High Carb	1.08478	1.15833	65.1444	F	23.6324	MZ	7.78333	FALSE	TRUE	predict1633	predict16332
81.6667	0.009495	-0.386111	-0.114286	4.963	0.001389	22.7301	9.33472	High Carb	1.2034	1.28333	65.1444	F	23.6324	MZ	7.76667	FALSE	TRUE	predict1633	predict16332
54.75	-0.011218	-0.033333	-0.514286	2.93787	0.001389	35.48	9.33472	UK Average	1.18805	1.62667	65.1444	F	23.6324	MZ	7.71667	FALSE	FALSE	predict1633	predict16332
53.75	-0.008725	-0.323611	0.269048	2.57103	0.668056	35.357	9.33472	OGTT	1.31791	0.233333	65.1444	F	23.6324	MZ	7.7	FALSE	FALSE	predict1633	predict16332
57	0.054063	0.3875	0.535714	2.58553	0.668056	51.0281	11.0014	UK Average	1.11056	1.04028	65.1444	F	23.6324	MZ	7.66667	FALSE	FALSE	predict1633	predict16332
50	0.035794	-0.741666	-0.597619	4.13862	0.001389	22.3174	10.0014	High Protein	0.832995	2.10694	65.1444	F	23.6324	MZ	7.65	FALSE	FALSE	predict1633	predict16332
59.25	0.053584	0.381945	0.235714	2.10075	2.66806	14.1426	7.00139	High Fibre	1.09238	0.844722	65.1444	F	23.6324	MZ	7.61667	FALSE	TRUE	predict1633	predict16332
67.25	-0.037808	-1	-0.814286	2.72488	1.33472	20.7651	9.50139	High Fat	0.631533	1.13611	65.1444	F	23.6324	MZ	7.58333	FALSE	TRUE	predict1633	predict16332
45	-0.027419	-0.799107	-0.283333	2.44769	1.50139	51.6549	7.50139	High Fat	0.815549	1.13556	49.6619	F	21.2487	MZ	7.03333	TRUE	FALSE	predict1645	predict16452
60	0.026308	0.832837	-0.583333	3.90446	2.00139	87.7243	12.0014	High Fat	0.951299	1.05333	49.6619	F	21.2487	MZ	7.05	TRUE	FALSE	predict1645	predict16452
52.6667	0.026183	-0.22133	-0.35	1.49851	0.834722	49.5067	7.33472	High Carb	1.6156	3.43583	49.6619	F	21.2487	MZ	7.08333	TRUE	FALSE	predict1645	predict16452
54.3333	-0.028752	-0.681052	-0.25	3.46928	2.33472	45.1096	7.33472	High Carb	1.69942	2.97694	49.6619	F	21.2487	MZ	7.11667	TRUE	FALSE	predict1645	predict16452
57	0.023157	0.407837	0.1	3.6555	3.00139	96.9822	7.66806	UK Average	1.26717	0.883611	49.6619	F	21.2487	MZ	7.13333	TRUE	TRUE	predict1645	predict16452
39.5	-0.027075	0.159226	1	3.86325	1.50139	39.8156	13.0014	OGTT	1.59642	2.04833	49.6619	F	21.2487	MZ	7.16667	TRUE	TRUE	predict1645	predict16452
50.5	-0.056842	-0.139385	-0.3	3.90236	0.501389	32.1813	10.8347	OGTT	1.1908	0.937222	49.6619	F	21.2487	MZ	7.2	TRUE	FALSE	predict1645	predict16452
56.3333	-0.010458	-0.97133	-0.6	2.0294	1.00139	97.1794	7.33472	UK Average	0.95225	1.14444	49.6619	F	21.2487	MZ	7.21667	TRUE	FALSE	predict1645	predict16452
11	0.035145	0.851893	-0.2	2.42053	1.83472	44.7563	8.66806	High Fat	0.806835	0.378333	51.5921	F	26.0003	MZ	7.8	FALSE	FALSE	predict1646	predict16462
61	-0.046018	-1.01755	-0.266667	3.06244	2.16806	32.3944	7.00139	High Carb	1.18085	2.7925	51.5921	F	26.0003	MZ	7.81667	FALSE	FALSE	predict1646	predict16462
25.6667	0.022531	0.824116	0.016667	2.76409	2.16806	44.0756	8.50139	OGTT	1.10185	0.440556	51.5921	F	26.0003	MZ	7.9	FALSE	FALSE	predict1646	predict16462
59.6667	0.017132	-0.411995	-0.616667	4.77732	0.001389	43.7999	8.33472	UK Average	0.972319	1.00278	51.5921	F	26.0003	MZ	7.91667	FALSE	FALSE	predict1646	predict16462
15	0.034277	-0.082829	-0.066667	4.22218	2.16806	47.1571	7.16806	High Fibre	0.939912	0.4625	51.5921	F	26.0003	MZ	7.93333	FALSE	FALSE	predict1646	predict16462
69	0.099229	-0.622743	-3.16458	4.21154	2.00139	17.6905	8.50139	High Fat	0.916677	4.06722	53.8344	F	53.2031	DZ	7.26667	FALSE	FALSE	predict1648	predict16482
70.5	-0.018593	4.05642	-0.08125	3.52504	6.66806	21.9033	10.1681	High Fat	0.86983	0.465	53.8344	F	53.2031	DZ	7.28333	FALSE	FALSE	predict1648	predict16482
68	0.051673	-1.61024	1.28542	3.83028	3.00139	16.5913	13.8347	High Carb	1.46203	4.72722	53.8344	F	53.2031	DZ	7.35	FALSE	TRUE	predict1648	predict16482
63.3333	-0.010973	-0.932465	1.26875	2.99914	4.00139	14.7661	12.3347	UK Average	1.41019	1.28556	53.8344	F	53.2031	DZ	7.46667	FALSE	FALSE	predict1648	predict16482
42	0.068639	-1.19497	0.11875	2.32654	9.33472	8.76807	13.8347	High Fibre	1.60363	5.93556	53.8344	F	53.2031	DZ	7.53333	FALSE	TRUE	predict1648	predict16482
70.5	-0.082435	-1.0537	1.6625	3.24271	2.83472	31.2203	9.16806	High Fat	0.837384	2.39444	63.2307	F	23.9188	MZ	7.68333	TRUE	FALSE	predict1698	predict16981
76.5	0.09837	-1.51204	1.6625	5.23564	0.334722	41.2204	8.00139	High Fat	0.76013	1.72917	63.2307	F	23.9188	MZ	7.7	TRUE	FALSE	predict1698	predict16981
46	0.071913	-1.38704	-1.32083	4.31149	0.001389	30.726	6.00139	OGTT	1.34006	-1.58333	63.2307	F	23.9188	MZ	6.8	FALSE	FALSE	predict1698	predict16981
61.6667	0.09326	-1.26065	-1.32083	2.76437	0.001389	22.768	5.83472	UK Average	0.969397	0.468056	63.2307	F	23.9188	MZ	6.81667	FALSE	FALSE	predict1698	predict16981
38	-0.035228	-1.16204	-1.2375	3.36081	0.501389	29.4349	6.83472	OGTT	1.4418	-1.89556	63.2307	F	23.9188	MZ	6.85	FALSE	FALSE	predict1698	predict16981
67.5	0.079262	-0.763426	-1.1375	4.26852	3.50139	33.9374	8.16806	High Protein	1.05755	0.351667	63.2307	F	23.9188	MZ	6.91667	FALSE	FALSE	predict1698	predict16981
63	-0.141478	-0.44537	2.47917	2.67361	0.834722	24.7176	9.00139	High Protein	0.953972	0.458611	63.2307	F	23.9188	MZ	6.95	FALSE	TRUE	predict1698	predict16981
35.3333	0.101999	-0.989815	-0.004167	2.30649	0.001389	38.46	9.16806	High Fibre	1.02483	0.314167	63.2307	F	23.9188	MZ	6.96667	FALSE	TRUE	predict1698	predict16981
64	-0.135514	0.297619	-1.75833	2.08915	0.001389	39.7133	8.16806	High Fat	0.660326	1.22639	63.2471	F	26.7423	MZ	6.88333	FALSE	FALSE	predict1698	predict16982
64	-0.079079	0.989286	0.308333	4.15708	1.83472	33.7786	6.83472	High Carb	1.04291	0.886111	63.2471	F	26.7423	MZ	6.91667	FALSE	FALSE	predict1698	predict16982
62	0.07213	-1.8871	-1.70833	3.51272	1.16806	28.3822	7.00139	High Carb	1.0316	2.55583	63.2471	F	26.7423	MZ	6.95	FALSE	TRUE	predict1698	predict16982
58	-0.036225	-0.571826	0.408333	2.84502	2.00139	35.0428	6.66806	UK Average	1.0328	0.319444	63.2471	F	26.7423	MZ	6.96667	FALSE	TRUE	predict1698	predict16982
44	-0.065045	-0.348214	-0.925	6.26143	0.834722	30.0602	9.83472	UK Average	0.855526	0.325	63.2471	F	26.7423	MZ	7	FALSE	FALSE	predict1698	predict16982
53.5	0.087782	-2.31488	-1.54167	4.32271	5.33472	38.3427	5.83472	OGTT	1.15347	1.0225	63.2471	F	26.7423	MZ	7.03333	FALSE	FALSE	predict1698	predict16982
57	0.040959	-1.13016	-1.20833	4.33475	0.834722	22.7079	9.00139	High Fibre	0.933947	0.554444	63.2471	F	26.7423	MZ	7.08333	FALSE	FALSE	predict1698	predict16982
80	-0.007992	-0.99127	-0.058333	4.79307	0.001389	21.8857	4.00139	High Protein	0.783962	1.20972	63.2471	F	26.7423	MZ	7.11667	FALSE	FALSE	predict1698	predict16982
72	0.079189	0.186508	0.141667	3.25626	1.50139	34.4954	7.50139	High Protein	0.707914	1.12639	63.2471	F	26.7423	MZ	7.15	FALSE	TRUE	predict1698	predict16982
59.3333	0.003093	0.364881	-0.566667	3.27404	1.66806	39.4418	7.33472	High Fat	0.577998	1.34472	43.4853	F	25.9767	MZ	6.9	TRUE	FALSE	predict1709	predict17091
69	0.011943	-0.287897	-0.583333	4.95622	0.168056	45.0962	7.50139	High Carb	0.653735	1.75639	43.4853	F	25.9767	MZ	6.91667	TRUE	FALSE	predict1709	predict17091
68	0.010664	-0.225397	0.3	4.79981	2.50139	38.0348	7.00139	High Carb	0.793971	0.647222	43.4853	F	25.9767	MZ	6.95	TRUE	TRUE	predict1709	predict17091
75	0.073828	-0.069842	0.816667	1.92426	0.001389	58.925	8.00139	UK Average	0.92229	0.661389	43.4853	F	25.9767	MZ	6.98333	TRUE	TRUE	predict1709	predict17091
71.3333	-0.053452	1.98016	0.45	3.2396	0.168056	33.6106	10.3347	OGTT	0.488895	-0.283056	43.4853	F	25.9767	MZ	7	TRUE	FALSE	predict1709	predict17091
52	0.039385	-1.14484	-0.45	2.95003	0.001389	98.1491	10.1681	OGTT	0.745972	0.473056	43.4853	F	25.9767	MZ	7.03333	TRUE	FALSE	predict1709	predict17091
64	0.01115	0.419047	-0.1	3.8359	-0.166667	39.0322	9.66806	UK Average	0.616741	0.538333	43.4853	F	25.9767	MZ	7.05	TRUE	FALSE	predict1709	predict17091
61.3333	-0.048478	-0.355953	-0.333333	5.30389	1.83472	46.072	10.5	High Fibre	0.744839	0.725556	43.4853	F	25.9767	MZ	7.08333	TRUE	FALSE	predict1709	predict17091
66.75	0.029071	-1.52262	-1.01667	3.08878	1.16806	43.878	7.50139	High Protein	0.744403	1.02917	43.4853	F	25.9767	MZ	7.11667	TRUE	FALSE	predict1709	predict17091
66.6667	0.022587	-2.50179	-0.35	5.80967	2.83472	37.783	7.16806	High Protein	0.329625	1.33722	43.4853	F	25.9767	MZ	7.13333	TRUE	TRUE	predict1709	predict17091
55.3333	0.001723	-0.19752	0.009524	3.23547	1.83472	34.6276	10.0014	High Fat	0.710574	1.58667	43.4853	F	25.5942	MZ	6.9	TRUE	FALSE	predict1709	predict17092
60.5	-0.036518	0.46498	0.009524	2.40991	1.66806	38.2863	8.66806	High Carb	1.13596	1.19361	43.4853	F	25.5942	MZ	6.91667	TRUE	FALSE	predict1709	predict17092
65.3333	-0.008351	1.37887	0.792857	14.4084	-5.16528	45.1855	10.0014	High Carb	1.12017	0.462222	43.4853	F	25.5942	MZ	6.95	TRUE	TRUE	predict1709	predict17092
54	0.009743	0.674702	0.47619	3.83045	2	51.3349	8.83472	OGTT	1.24332	0.166389	43.4853	F	25.5942	MZ	6.98333	TRUE	TRUE	predict1709	predict17092
53.5	0.027884	-0.140576	-0.357143	17.6345	0.001389	36.4485	9.66667	OGTT	0.71906	0.902778	43.4853	F	25.5942	MZ	7	TRUE	FALSE	predict1709	predict17092
55.6667	0.022077	0.151091	0.609524	11.2701	8.00139	31.686	7.16806	UK Average	0.764162	0.314444	43.4853	F	25.5942	MZ	7.03333	TRUE	FALSE	predict1709	predict17092
49.75	-0.012907	0.398313	0.509524	13.5055	-5.33194	21.7169	13.0014	UK Average	0.945446	0.426111	43.4853	F	25.5942	MZ	7.05	TRUE	FALSE	predict1709	predict17092
55.5	0.037974	-1.02391	-0.42381	15.9239	0.001389	26.253	6.16806	High Protein	0.619128	1.06333	43.4853	F	25.5942	MZ	7.08333	TRUE	FALSE	predict1709	predict17092
63.6667	-0.012908	0.294147	0.659524	13.4118	0.834722	38.9639	9.83472	High Fibre	0.9779	0.578889	43.4853	F	25.5942	MZ	7.11667	TRUE	FALSE	predict1709	predict17092
55	0.008651	-0.79752	-0.340476	13.189	-5.66528	39.7749	8.00139	High Protein	0.803485	1.29944	43.4853	F	25.5942	MZ	7.13333	TRUE	TRUE	predict1709	predict17092
57	0.010199	-1.54881	-0.020238	2.64086	0.501389	24.5823	8.83472	High Carb	1.22533	0.748611	48.5667	M	23.7992	MZ	6.8	FALSE	FALSE	predict1764	predict17642
44	0.060986	0.974801	-0.803571	4.64582	3.16806	33.2417	8.50139	OGTT	1.46872	1.11278	48.5667	M	23.7992	MZ	6.81667	FALSE	FALSE	predict1764	predict17642
28.25	0.053098	-3.80437	-0.620238	2.78175	0.834722	37.6403	10.1681	UK Average	1.08824	0.393333	48.5667	M	23.7992	MZ	6.85	FALSE	FALSE	predict1764	predict17642
18.75	0.051755	1.12758	-0.870238	4.15628	3.33472	37.2839	8.66806	OGTT	1.32766	1.1125	48.5667	M	23.7992	MZ	6.88333	FALSE	FALSE	predict1764	predict17642
54.3333	-0.031213	-3.07659	-0.503571	3.40783	0.668056	40.5511	8.83472	UK Average	0.665755	0.672222	48.5667	M	23.7992	MZ	6.91667	FALSE	FALSE	predict1764	predict17642
47.5	0.055001	-0.16131	-0.270238	4.09198	1.00139	50.6845	9.00139	High Protein	0.62951	1.42917	48.5667	M	23.7992	MZ	6.95	FALSE	TRUE	predict1764	predict17642
52.6667	0.007406	0.605357	0.629762	4.72891	0.334722	45.4477	9.33472	High Protein	0.518691	0.2625	48.5667	M	23.7992	MZ	6.96667	FALSE	TRUE	predict1764	predict17642
53.4	-0.007241	2.73452	1.16309	4.40719	0.001389	38.4345	9.00139	High Fibre	0.937505	0.136389	48.5667	M	23.7992	MZ	7	FALSE	FALSE	predict1764	predict17642
81	-0.030009	0.295039	-0.388095	3.26422	1.00139	44.0042	5.83472	High Fat	0	0.949722	37.3744	M	21.874	DZ	7.48333	TRUE	FALSE	predict1786	predict17861
83.3333	0.056281	0.064484	-0.404762	6.66989	1.00139	45.0484	6.00139	High Carb	1.05726	2.61167	37.3744	M	21.874	DZ	7.5	TRUE	FALSE	predict1786	predict17861
71.6667	-0.025054	-0.336905	0.528571	8.03012	0.001389	44.2253	6.00139	High Carb	1.09217	0.588889	37.3744	M	21.874	DZ	7.53333	TRUE	TRUE	predict1786	predict17861
73	-0.036137	2.12421	0.811905	7.18804	0.834722	57.6521	7.00139	UK Average	1.02433	0.410278	37.3744	M	21.874	DZ	7.56667	TRUE	TRUE	predict1786	predict17861
74	-0.007811	0.201984	-0.088095	9.22033	0.168056	55.8438	9.00139	OGTT	1.20258	0.111667	37.3744	M	21.874	DZ	7.58333	TRUE	FALSE	predict1786	predict17861
78.25	-0.036866	-0.20635	-0.221429	7.3111	0.001389	45.7175	8.33472	OGTT	1.16637	0.773611	37.3744	M	21.874	DZ	7.61667	TRUE	FALSE	predict1786	predict17861
80.5	0.076133	-0.779961	-0.338095	9.11497	1.00139	26.486	10.8347	UK Average	0	0.954167	37.3744	M	21.874	DZ	7.65	TRUE	FALSE	predict1786	predict17861
80.3333	0.02761	-1.34663	-0.254762	7.55602	1.00139	41.853	6.00139	High Fibre	0.970657	0.755	37.3744	M	21.874	DZ	7.68333	TRUE	FALSE	predict1786	predict17861
75.8	-0.01421	-0.892461	0.111905	3.75598	0.001389	40.5777	6.00139	High Protein	0.937053	0.337222	37.3744	M	21.874	DZ	7.7	TRUE	FALSE	predict1786	predict17861
79.75	0.019858	0.251984	0.228571	8.4603	0.334722	24.0608	5.33472	High Protein	1.02291	0.656111	37.3744	M	21.874	DZ	7.73333	TRUE	TRUE	predict1786	predict17861
46	-0.009466	-0.808036	-0.7	3.00028	0.668056	46.0877	6.66806	MCB	0.872613	0.95	41.1992	F	23.9843	MZ	6.01667	TRUE	FALSE	predict1791	predict17911
32	0.002759	-0.166369	-0.716667	2.04663	0.501389	37.4254	9.50139	High Carb	0.886225	0.369722	41.1992	F	23.9843	MZ	5.98333	TRUE	FALSE	predict1791	predict17911
51	-0.035018	1.09752	0.966667	1.73564	1.66806	32.0098	7.00139	High Carb	0.866391	0.31	41.1992	F	23.9843	MZ	5.95	TRUE	FALSE	predict1791	predict17911
48	0.000954	0.657242	0.816667	2.17537	0.668056	41.7276	9.83472	UK Average	0.662302	0.418333	41.1992	F	23.9843	MZ	5.83333	TRUE	FALSE	predict1791	predict17911
45.5	-0.069933	-2.04692	-0.9	2.50828	0.834722	59.1775	8.66806	UK Average	0.728566	1.19444	41.1992	F	23.9843	MZ	5.8	TRUE	FALSE	predict1791	predict17911
46.5	-0.000785	-1.02192	-0.85	3.33805	0.168056	66.9505	12.6681	High Fat	0.480172	1.14444	41.1992	F	23.9843	MZ	5.76667	TRUE	FALSE	predict1791	predict17911
42	0.013221	-0.489981	-0.5	4.96421	0.334722	42.5198	11.3347	High Fibre	0.65913	0.702778	41.1992	F	23.9843	MZ	5.73333	TRUE	FALSE	predict1791	predict17911
49	0.016371	-0.881647	-0.466667	1.60902	0.334722	28.3111	7.33472	High Protein	0.272409	0.769722	41.1992	F	23.9843	MZ	5.7	TRUE	FALSE	predict1791	predict17911
53.5	-0.008642	0.936966	0.712821	4.21566	0.168056	46.3099	7.66806	High Fat	0.598408	1.87528	55.5483	F	25.5212	MZ	7.53333	TRUE	TRUE	predict1796	predict17961
47.5	-0.002182	-0.217201	0.029487	4.06796	0.001389	55.2887	9.00139	High Carb	1.10709	1.32028	55.5483	F	25.5212	MZ	7.56667	TRUE	TRUE	predict1796	predict17961
52.25	0.039062	-1.21859	-0.687179	1.72212	1.83472	49.4709	8.66806	High Carb	1.23602	1.55528	55.5483	F	25.5212	MZ	7.58333	TRUE	FALSE	predict1796	predict17961
42	-0.005722	0.416132	0.079487	3.13354	2.16806	48.8277	7.50139	OGTT	1.30239	0.103333	55.5483	F	25.5212	MZ	7.61667	TRUE	FALSE	predict1796	predict17961
55.75	0.021512	-0.097757	-0.770513	2.21389	0.501389	58.2678	8.16806	UK Average	0.773628	2.08111	55.5483	F	25.5212	MZ	7.65	TRUE	FALSE	predict1796	predict17961
48	-0.054071	-0.017201	0.296154	2.982	0.001389	53.8472	6.83472	OGTT	1.00814	0.433611	55.5483	F	25.5212	MZ	7.68333	TRUE	FALSE	predict1796	predict17961
54	0.004812	-0.378312	0.112821	2.50055	1.66806	57.7797	9.50139	UK Average	0.73153	1.02778	55.5483	F	25.5212	MZ	7.7	TRUE	FALSE	predict1796	predict17961
49.5	-0.025244	0.820299	0.846154	5.58689	3.50139	41.3305	8.83472	High Fibre	0.957153	1.76361	55.5483	F	25.5212	MZ	7.73333	TRUE	TRUE	predict1796	predict17961
39.75	-0.017008	0.399405	0.841667	2.01363	1.50139	44.6225	10.3347	High Fat	0.725499	0.880833	55.5483	F	27.979	MZ	7.53333	TRUE	TRUE	predict1796	predict17962
35.3333	-0.009934	-0.136706	0.875	3.40178	2.00139	58.9522	8.66806	High Carb	1.28872	0.840278	55.5483	F	27.979	MZ	7.56667	TRUE	TRUE	predict1796	predict17962
49.5	-0.012993	-1.24226	-1.325	4.3221	0.001389	54.0752	10.8347	High Carb	0.847966	0.51	55.5483	F	27.979	MZ	7.58333	TRUE	FALSE	predict1796	predict17962
48.75	-0.006571	-0.886706	-0.941667	4.77499	0.001389	38.5523	6.16806	OGTT	1.01759	0.361111	55.5483	F	27.979	MZ	7.61667	TRUE	FALSE	predict1796	predict17962
51	0.035975	-0.233928	-0.125	2.79017	0.501389	37.5355	8.50139	UK Average	0.738461	1.5875	55.5483	F	27.979	MZ	7.65	TRUE	FALSE	predict1796	predict17962
51	-0.02758	-0.701984	-1.04167	3.06697	0.668056	68.8559	7.16806	UK Average	0.762371	0.327778	55.5483	F	27.979	MZ	7.68333	TRUE	FALSE	predict1796	predict17962
50.6667	0.024037	-0.514484	-0.808333	5.42706	1.16806	41.2545	6.83472	OGTT	0.836447	0.232222	55.5483	F	27.979	MZ	7.7	TRUE	FALSE	predict1796	predict17962
47.75	0.04355	-0.420536	1.37143	2.02186	4.16806	51.4871	11.0014	MCB	0.288219	1.0675	39.436	F	22.1797	MZ	7.41667	FALSE	TRUE	predict1797	predict17971
48.3333	0.037223	0.583631	1.47143	2.14867	4.00139	53.3208	10.1681	High Carb	0.370771	0.509444	39.436	F	22.1797	MZ	7.4	FALSE	TRUE	predict1797	predict17971
59.25	0.005686	-0.083036	-0.711905	5.58139	2.16806	37.818	11.3347	High Carb	0.856208	2.35389	39.436	F	22.1797	MZ	7.36667	FALSE	FALSE	predict1797	predict17971
47	0.025544	-0.095536	-0.628571	4.70938	0.501389	58.1385	12.3347	OGTT	0.819605	0.557778	39.436	F	22.1797	MZ	7.33333	FALSE	FALSE	predict1797	predict17971
55.6667	-0.049655	-0.433036	-0.945238	4.69881	1.66806	48.1817	13.1681	UK Average	0.630642	0.887778	39.436	F	22.1797	MZ	7.3	FALSE	FALSE	predict1797	predict17971
56	-0.003441	-0.196925	-0.995238	3.16701	0.834722	48.9914	12.5014	OGTT	1.12001	0.868333	39.436	F	22.1797	MZ	7.26667	FALSE	FALSE	predict1797	predict17971
61.3333	-0.036823	-0.955258	-0.961905	4.84794	2.00139	47.2634	13.5014	UK Average	0.702616	0.845833	39.436	F	22.1797	MZ	7.23333	FALSE	FALSE	predict1797	predict17971
62.5	-0.001344	-0.196925	0.621429	4.32685	2.66806	37.0953	10.8347	High Fibre	0.552081	0.872222	39.436	F	22.1797	MZ	7.2	FALSE	TRUE	predict1797	predict17971
51	-0.011617	-0.619147	0.404762	4.27597	3.16806	63.2788	9.66806	High Fat	0.361283	0.746944	39.436	F	22.1797	MZ	7.16667	FALSE	TRUE	predict1797	predict17971
60	-0.003482	2.98085	1.55476	3.47111	2.50139	43.644	8.33472	High Protein	0.424165	0.251667	39.436	F	22.1797	MZ	7.13333	FALSE	FALSE	predict1797	predict17971
65.5	-0.120992	-1.00754	0.003571	5.0129	2.66806	54.1619	10.0014	High Carb	0.809796	2.2875	39.436	F	21.9479	MZ	7.4	FALSE	TRUE	predict1797	predict17972
69	0.050725	-0.829762	-0.379762	5.48276	0.334722	66.9493	9.50139	High Carb	0.668365	0.307778	39.436	F	21.9479	MZ	7.36667	FALSE	FALSE	predict1797	predict17972
90	0.023569	-0.976984	-0.479762	4.01338	0.334722	48.7527	13.0014	UK Average	0.708413	1.02333	39.436	F	21.9479	MZ	7.33333	FALSE	FALSE	predict1797	predict17972
80.5	-0.045472	1.58691	-0.246429	6.20621	0.501389	37.2134	10.6681	OGTT	0.981621	0.590556	39.436	F	21.9479	MZ	7.3	FALSE	FALSE	predict1797	predict17972
82	0.03442	-0.413095	-0.629762	3.71061	2.16806	36.4207	8.16806	UK Average	0.504511	0.871111	39.436	F	21.9479	MZ	7.26667	FALSE	FALSE	predict1797	predict17972
81.25	0.021243	-0.017262	-0.529762	4.90815	0.668056	45.3839	8.83472	OGTT	0.862058	0.752778	39.436	F	21.9479	MZ	7.23333	FALSE	FALSE	predict1797	predict17972
79.6667	0.014581	2.30496	1.7869	4.5785	0.668056	44.3252	8.00139	High Fibre	0.775247	0.221667	39.436	F	21.9479	MZ	7.2	FALSE	TRUE	predict1797	predict17972
81	-0.064191	1.31329	0.770238	4.91265	2.16806	123.263	10.5014	High Protein	0.54712	1.18278	39.436	F	21.9479	MZ	7.16667	FALSE	TRUE	predict1797	predict17972
73	-0.0011	-4.25059	-0.963095	6.16451	0.001389	73.1325	10.1681	High Fat	0.442216	1.43056	39.436	F	21.9479	MZ	7.13333	FALSE	FALSE	predict1797	predict17972
79	-0.086717	-1.0669	-0.530556	4.03595	2.00139	37.0753	7.00139	High Fat	0.960279	1.94278	45.0951	M	27.5026	MZ	7.06667	FALSE	FALSE	predict1808	predict18081
87.6667	0.007469	-0.491898	-0.663889	2.96361	0.668056	30.1872	7.50139	High Carb	1.58983	4.44611	45.0951	M	27.5026	MZ	7.08333	FALSE	FALSE	predict1808	predict18081
86.3333	0.026398	-0.203009	0.236111	5.37232	1.66806	37.9101	6.66806	High Carb	1.34967	3.04806	45.0951	M	27.5026	MZ	7.11667	FALSE	FALSE	predict1808	predict18081
54	-0.017707	0.288658	0.969444	3.64388	2.50139	36.5456	8.83472	OGTT	1.2373	-0.784444	45.0951	M	27.5026	MZ	7.18333	FALSE	TRUE	predict1808	predict18081
77.3333	0.047032	-0.719676	0.119444	7.02074	2.50139	33.3596	10.6681	UK Average	1.26804	2.84278	45.0951	M	27.5026	MZ	7.2	FALSE	FALSE	predict1808	predict18081
86	0.024525	0.428936	-0.530556	8.84217	0.168056	38.009	7.33472	UK Average	1.16223	3.40861	45.0951	M	27.5026	MZ	7.23333	FALSE	FALSE	predict1808	predict18081
76	-0.032383	-0.504398	0.186111	8.5428	2.66806	30.3792	8.00139	High Protein	0.883261	0.955	45.0951	M	27.5026	MZ	7.26667	FALSE	FALSE	predict1808	predict18081
90.25	0.01966	-0.462731	-0.397222	4.46181	1.83472	29.035	13.0014	High Fibre	1.05702	2.12361	45.0951	M	27.5026	MZ	7.28333	FALSE	FALSE	predict1808	predict18081
83.75	0.061202	-1.08495	-0.363889	4.95186	2.33472	19.7914	8.00139	High Protein	0.889391	1.17944	45.0951	M	27.5026	MZ	7.31667	FALSE	FALSE	predict1808	predict18081
74.6667	0.021207	0.4875	-1.2859	4.98101	1.16806	36.281	13.8347	High Fat	1.03143	3.92833	45.0951	M	31.0162	MZ	7.06667	FALSE	FALSE	predict1808	predict18082
72.5	0.050827	-1.89028	-1.0359	7.68626	0.168056	40.2842	7.66806	High Carb	1.40653	3.365	45.0951	M	31.0162	MZ	7.08333	FALSE	FALSE	predict1808	predict18082
67	0.014446	-0.851389	-0.552564	6.76089	0.001389	30.4385	7.16806	High Carb	1.21695	2.37639	45.0951	M	31.0162	MZ	7.11667	FALSE	FALSE	predict1808	predict18082
62.5	0.032515	-0.344444	0.597436	8.00786	3.83472	37.1241	9.33472	UK Average	0.976467	2.28583	45.0951	M	31.0162	MZ	7.15	FALSE	TRUE	predict1808	predict18082
72.5	-0.053918	0.019444	0.547436	13.704	1.00139	32.4825	10.3347	UK Average	1.05244	1.12306	45.0951	M	31.0162	MZ	7.18333	FALSE	TRUE	predict1808	predict18082
70.75	-0.014344	-1.54722	-0.969231	12.3562	2.33472	31.054	6.16806	OGTT	1.27872	2.58194	45.0951	M	31.0162	MZ	7.2	FALSE	FALSE	predict1808	predict18082
55	-0.000373	-0.0375	-0.752564	11.3583	1.66806	41.8619	7.33472	OGTT	1.41322	0.908611	45.0951	M	31.0162	MZ	7.23333	FALSE	FALSE	predict1808	predict18082
66	0.055261	-0.440278	-0.869231	8.62341	2.00139	25.4972	12.5014	High Fibre	1.11697	2.14583	45.0951	M	31.0162	MZ	7.26667	FALSE	FALSE	predict1808	predict18082
71	0.029064	-0.798611	-0.635897	4.03411	4.83472	36.6795	7.00139	High Protein	0.751914	2.51694	45.0951	M	31.0162	MZ	7.31667	FALSE	FALSE	predict1808	predict18082
74	-0.022338	2.80556	1.9641	2.4135	1.00139	26.8961	10.0014	High Protein	0.949689	0.896944	45.0951	M	31.0162	MZ	7.35	FALSE	TRUE	predict1808	predict18082
57	0.04816	-0.112714	-0.226923	3.47149	1.33472	20.0037	6.83472	High Fat	0.18639	2.06806	45.0951	F	22.2066	NT	7.06667	FALSE	FALSE	predict18168	predict18168
62	0.02955	-0.196047	0.073077	2.33357	1.66806	27.0566	7.00139	High Carb	0.999645	1.91111	45.0951	F	22.2066	NT	7.08333	FALSE	FALSE	predict18168	predict18168
36.5	-0.054313	0.842841	0.973077	2.40569	1.33472	31.2163	7.16806	UK Average	0.873931	1.25583	45.0951	F	22.2066	NT	7.15	FALSE	TRUE	predict18168	predict18168
59	0.028629	0.188675	0.10641	1.50693	0.168056	31.4413	8.33472	OGTT	1.14862	1.98083	45.0951	F	22.2066	NT	7.18333	FALSE	TRUE	predict18168	predict18168
51	-0.006327	-0.554381	-0.34359	1.63264	1.66806	20.9834	6.50139	High Protein	0.667426	2.62778	45.0951	F	22.2066	NT	7.26667	FALSE	FALSE	predict18168	predict18168
88.6667	0.060248	-0.447864	-0.00641	2.58352	1.83472	57.8246	8.16806	High Fat	1.01508	2.54833	52.1588	F	29.2739	DZ	7.68333	FALSE	FALSE	predict1826	predict18261
86.25	-0.008159	0.054914	0.360256	4.65536	2.16806	49.8355	9.16806	High Carb	1.28159	3.835	52.1588	F	29.2739	DZ	7.71667	FALSE	TRUE	predict1826	predict18261
72.25	-0.096102	-0.31453	-0.10641	13.8436	2.00139	45.18	7.16806	OGTT	1.09488	0.518611	52.1588	F	29.2739	DZ	7.76667	FALSE	FALSE	predict1826	predict18261
68.3333	0.019805	-0.195086	0.160256	4.21621	0.501389	47.8662	7.83472	OGTT	1.30691	0.630278	52.1588	F	29.2739	DZ	7.78333	FALSE	FALSE	predict1826	predict18261
67	0.005558	1.04103	0.34359	5.34737	1.33472	40.5107	7.00139	UK Average	1.19746	0.694167	52.1588	F	29.2739	DZ	7.8	FALSE	FALSE	predict1826	predict18261
78	-0.000561	-0.857586	-0.35641	5.79131	0.001389	64.0405	9.66806	UK Average	1.06353	0.616111	52.1588	F	29.2739	DZ	7.81667	FALSE	FALSE	predict1826	predict18261
79.3333	0.035129	-1.14647	-0.989744	5.43542	0.501389	43.5721	6.66806	High Fibre	1.26252	2.76972	52.1588	F	29.2739	DZ	7.85	FALSE	FALSE	predict1826	predict18261
74.5	-0.007313	1.01047	0.176923	12.6496	0.501389	45.7846	8.33472	High Protein	0.724756	0.456667	52.1588	F	29.2739	DZ	7.91667	FALSE	FALSE	predict1826	predict18261
87.5	0.040773	-1.16081	0.039286	5.0701	1.16806	50.0127	10.3347	High Fat	0.797654	1.14306	60.8405	F	23.7141	DZ	8.08333	FALSE	FALSE	predict1842	predict18421
83	0.023578	-0.119146	-0.477381	3.96933	2.00139	54.7009	6.33472	High Carb	0.871192	1.75611	60.8405	F	23.7141	DZ	8.08333	FALSE	TRUE	predict1842	predict18421
92	-0.073989	0.321131	0.239286	3.97578	0.334722	78.2205	8.16806	High Carb	0.923753	0.953056	60.8405	F	23.7141	DZ	8.06667	FALSE	TRUE	predict1842	predict18421
79.25	-0.074686	-0.649702	-1.39405	2.28823	2.00139	54.6593	6.16806	OGTT	1.53203	2.56167	60.8405	F	23.7141	DZ	8.06667	FALSE	FALSE	predict1842	predict18421
85.5	0.018002	1.36835	0.439286	3.50998	0.001389	59.5222	7.16806	OGTT	0.995063	0.748889	60.8405	F	23.7141	DZ	8.05	FALSE	FALSE	predict1842	predict18421
90	0.012026	-0.749702	-1.14405	3.34012	0.501389	59.3408	5.83472	UK Average	0.715623	2.32778	60.8405	F	23.7141	DZ	8.05	FALSE	FALSE	predict1842	predict18421
87.3333	0.030423	-2.69831	-1.32738	2.79887	1.33472	46.7918	5.66806	UK Average	0.952969	2.52944	60.8405	F	23.7141	DZ	8.03333	FALSE	FALSE	predict1842	predict18421
87.75	0.011218	-0.892757	-0.260714	1.8099	0.001389	42.5879	9.16806	High Fibre	0.919538	1.4675	60.8405	F	23.7141	DZ	8.03333	FALSE	FALSE	predict1842	predict18421
89.3333	-0.007757	-0.016369	-0.344048	4.23408	0.501389	33.8547	7.50139	High Fat	0.709067	1.51583	60.8405	F	23.7141	DZ	8.01667	FALSE	TRUE	predict1842	predict18421
88.75	0.031914	0.12252	-0.094048	3.85603	0.334722	39.9791	6.66806	High Protein	0.470276	1.30028	60.8405	F	23.7141	DZ	8	FALSE	TRUE	predict1842	predict18421
47.5	-0.007561	0.975992	0.053571	1.63809	0.334722	46.9263	8.50139	MCB	0.95058	1.02306	21.9767	M	29.3403	MZ	6.96667	FALSE	TRUE	predict1868	predict18681
49	0.016114	-0.993452	-2.4131	7.94423	0.001389	44.882	9.50139	High Carb	1.23732	0.385	21.9767	M	29.3403	MZ	6.93333	FALSE	TRUE	predict1868	predict18681
57.25	0.069653	1.1246	0.103571	3.82223	0.501389	84.0978	4.50139	High Carb	1.03669	0.545	21.9767	M	29.3403	MZ	6.9	FALSE	FALSE	predict1868	predict18681
37.5	-0.028225	-0.168452	-0.146429	3.41076	0.001389	61.0032	10.3347	UK Average	0.917292	0.537222	21.9767	M	29.3403	MZ	6.86667	FALSE	FALSE	predict1868	predict18681
57.4	-0.060916	0.77877	-0.463095	3.03389	0.001389	35.0768	8.00139	UK Average	0.962984	0.508889	21.9767	M	29.3403	MZ	6.83333	FALSE	FALSE	predict1868	predict18681
59	0.028965	0.321826	-0.079762	3.23019	1.16806	75.7421	7.16806	OGTT	1.23708	0.607222	21.9767	M	29.3403	MZ	6.8	FALSE	FALSE	predict1868	predict18681
43	-0.04567	-0.317063	-0.296429	2.83447	0.001389	36.4923	7.16806	OGTT	1.13143	0.396389	21.9767	M	29.3403	MZ	6.76667	FALSE	FALSE	predict1868	predict18681
48.75	0.168484	-5.0254	-2.17976	11.4545	1.83472	45.2089	0.001389	High Protein	0.702442	5.25694	21.9767	M	29.3403	MZ	6.68333	FALSE	TRUE	predict1868	predict18681
39	0.0164	0.795437	1.82024	3.51275	2.50139	30.0007	9.66806	High Fibre	0.926521	0.425556	21.9767	M	29.3403	MZ	6.65	FALSE	FALSE	predict1868	predict18681
6	-0.065212	2.54167	1.78809	4.73552	2.16806	54.9447	10.3347	High Fat	0.271308	-2.00694	47.5127	F	20.3375	MZ	7.16667	TRUE	TRUE	predict1881	predict18811
64.5	0.011428	-1.05417	-0.111905	1.08451	1.83472	63.1211	11.6681	High Carb	0.568255	0.44	47.5127	F	20.3375	MZ	7.2	TRUE	FALSE	predict1881	predict18811
87	0.070851	-1.01389	-0.311905	2.95398	2.66806	44.0688	7.83472	High Carb	0.569232	0.916944	47.5127	F	20.3375	MZ	7.21667	TRUE	FALSE	predict1881	predict18811
15	0.047102	1.91806	-0.395238	4.47909	0.001389	44.7841	13.1681	UK Average	0.474782	1.03028	47.5127	F	20.3375	MZ	7.25	TRUE	FALSE	predict1881	predict18811
86	-0.013224	1.62778	-0.845238	2.97768	2.66806	56.4496	8.16806	UK Average	0.538528	1.15083	47.5127	F	20.3375	MZ	7.28333	TRUE	FALSE	predict1881	predict18811
68	-0.017891	-0.9625	-0.445238	1.45256	3.00139	44.6025	13.1681	High Fibre	0.810306	1.03722	47.5127	F	20.3375	MZ	7.36667	TRUE	TRUE	predict1881	predict18811
35	0.017541	-0.536111	-0.361905	1.55606	2.00139	35.2427	8.16806	High Protein	0.135275	0.375	47.5127	F	20.3375	MZ	7.38333	TRUE	FALSE	predict1881	predict18811
47	0.138342	-0.133334	-0.345238	0.712261	0.501389	56.3577	8.33472	High Protein	0.366435	0.890278	47.5127	F	20.3375	MZ	7.41667	TRUE	FALSE	predict1881	predict18811
85.6667	0.109313	-0.872685	-0.5125	2.38844	1.00139	58.5205	13.8347	High Carb	0.59821	0.928611	47.5127	F	18.3598	MZ	7.2	TRUE	FALSE	predict1881	predict18812
88.3333	0.057907	1.06204	0.170833	0.981797	1.66806	56.8575	11.6681	High Carb	0.748561	0.844167	47.5127	F	18.3598	MZ	7.21667	TRUE	FALSE	predict1881	predict18812
75.5	0.082154	-1.1713	-0.7125	2.12977	0.001389	26.2077	13.3347	UK Average	0.320528	0.594167	47.5127	F	18.3598	MZ	7.25	TRUE	FALSE	predict1881	predict18812
89	-0.025017	2.40232	0.7875	1.39704	0.168056	59.3556	8.50139	UK Average	0.793953	0.302778	47.5127	F	18.3598	MZ	7.33333	TRUE	TRUE	predict1881	predict18812
93.3333	-0.023067	-0.331018	0.720833	1.56434	3.50139	64.8971	13.0014	High Protein	0.355147	0.835	47.5127	F	18.3598	MZ	7.36667	TRUE	TRUE	predict1881	predict18812
93	-0.066269	-0.561574	-0.195833	2.08688	0.501389	43.8454	8.83472	High Protein	0.195841	0.265556	47.5127	F	18.3598	MZ	7.38333	TRUE	FALSE	predict1881	predict18812
94.25	0.028325	1.4787	-0.595833	1.2726	0.001389	29.782	7.66806	High Fibre	0.748026	0.535	47.5127	F	18.3598	MZ	7.41667	TRUE	FALSE	predict1881	predict18812
49	0.030491	0.81218	1.0218	2.28688	4.00139	33.2225	11.0014	High Fat	1.1262	0.781944	47.7207	F	24.9166	MZ	7.65	TRUE	FALSE	predict1883	predict18831
48	0.047144	-0.414209	-0.261538	1.79394	0.668056	25.3655	9.16806	High Carb	1.55446	1.24889	47.7207	F	24.9166	MZ	7.68333	TRUE	FALSE	predict1883	predict18831
50.6667	-0.040846	-0.294764	0.355128	2.5817	3.50139	33.2081	7.83472	High Carb	1.51541	0.719444	47.7207	F	24.9166	MZ	7.7	TRUE	FALSE	predict1883	predict18831
59	-0.080646	-0.793376	0.671795	2.04767	1.83472	29.7429	8.83472	UK Average	0.949306	0.220833	47.7207	F	24.9166	MZ	7.73333	TRUE	TRUE	predict1883	predict18831
28	0.001642	-1.1406	-1.07821	3.1649	2.16806	31.4776	8.83472	OGTT	1.77543	0.405556	47.7207	F	24.9166	MZ	6.81667	FALSE	FALSE	predict1883	predict18831
60	0.044067	-0.63782	-0.811538	1.96349	2.16806	32.0855	11.0014	High Protein	1.21608	0.737778	47.7207	F	24.9166	MZ	6.85	FALSE	FALSE	predict1883	predict18831
52	0.014439	-0.898931	-0.744872	2.66547	0.001389	22.8823	11.1681	High Protein	1.01055	0.283333	47.7207	F	24.9166	MZ	6.91667	FALSE	FALSE	predict1883	predict18831
71	0.061265	-2.32806	-4.31333	5.33402	0.168056	57.5477	7.00139	High Fat	0.878784	8.09167	53.3005	F	35.653	DZ	7.46667	FALSE	FALSE	predict189	predict1891
68	-0.031668	0.916389	1.00333	3.7687	1.50139	44.2738	8.83472	High Carb	0.893044	1.72778	53.3005	F	35.653	DZ	7.48333	FALSE	FALSE	predict189	predict1891
47.5	-0.013375	-3.2475	1.18667	5.52672	1.66806	35.9874	13.5014	OGTT	1.06596	0.918333	53.3005	F	35.653	DZ	7.61667	FALSE	FALSE	predict189	predict1891
48	0.009804	-2.41139	-2.46333	7.42152	2.00139	37.695	7.33472	High Protein	1.04481	7.21278	53.3005	F	35.653	DZ	7.66667	FALSE	FALSE	predict189	predict1891
61	-0.007852	0.003889	0.253333	2.81419	0.001389	33.0135	7.00139	High Protein	1.14429	4.28222	53.3005	F	35.653	DZ	7.68333	FALSE	FALSE	predict189	predict1891
56	-0.027069	0.660219	0.234524	5.70407	0.668056	21.118	6.50139	MCB	0.770495	0.653889	45.1225	F	22.6905	MZ	6.05	FALSE	FALSE	predict1899	predict18991
73.5	0.042311	-0.950893	-0.265476	4.65158	1.16806	21.3666	9.33472	High Carb	1.00802	1.32778	45.1225	F	22.6905	MZ	6.01667	FALSE	FALSE	predict1899	predict18991
78.25	0.030284	-0.75367	-0.74881	1.68055	0.168056	24.5973	8.83472	High Carb	0.672703	0.708611	45.1225	F	22.6905	MZ	5.98333	FALSE	FALSE	predict1899	predict18991
77.5	-0.007278	0.075496	0.05119	2.04733	0.501389	22.4141	11.8347	OGTT	1.10148	1.06611	45.1225	F	22.6905	MZ	5.95	FALSE	TRUE	predict1899	predict18991
69.75	-0.010663	3.188	2.53452	4.93987	0.001389	42.0226	8.33472	OGTT	1.34672	0.303333	45.1225	F	22.6905	MZ	5.9	FALSE	TRUE	predict1899	predict18991
79.75	0.028029	-1.3745	-0.465476	6.38448	0.168056	31.636	11.8347	UK Average	0.897959	1.90333	45.1225	F	22.6905	MZ	5.86667	FALSE	FALSE	predict1899	predict18991
80	-0.025412	-2.18423	-0.582143	4.10752	1.00139	31.0253	13.1681	UK Average	0.832808	2.07639	45.1225	F	22.6905	MZ	5.83333	FALSE	FALSE	predict1899	predict18991
78	-0.038293	0.814385	0.217857	3.93556	1.50139	35.0411	11.6681	High Fibre	1.04833	1.40056	45.1225	F	22.6905	MZ	5.78333	FALSE	FALSE	predict1899	predict18991
79.6667	0.021071	0.156052	-0.74881	5.20148	1.16806	22.4525	7.16806	High Fat	0.664295	2.31	45.1225	F	22.6905	MZ	5.75	FALSE	FALSE	predict1899	predict18991
76.5	-0.006352	0.018552	-0.74881	5.08609	0.001389	34.055	6.16806	High Protein	0.578632	2.06917	45.1225	F	22.6905	MZ	5.71667	FALSE	FALSE	predict1899	predict18991
76.25	0.000325	-0.647718	-0.461905	2.065	0.168056	20.4543	10.1681	MCB	1.03516	1.12444	45.1225	F	20.5994	MZ	6.05	FALSE	FALSE	predict1899	predict18992
75.6667	0.027171	-0.750496	-0.461905	5.35305	0.334722	26.5517	10.3347	High Carb	0.839664	1.87833	45.1225	F	20.5994	MZ	6.01667	FALSE	FALSE	predict1899	predict18992
82	0.005189	-1.01994	-0.778571	5.01679	0.168056	39.1713	9.66806	High Carb	0.918708	2.02056	45.1225	F	20.5994	MZ	5.98333	FALSE	FALSE	predict1899	predict18992
62	-0.005774	1.5995	0.971429	2.85744	0.001389	26.014	9.16806	OGTT	1.15632	0.250556	45.1225	F	20.5994	MZ	5.95	FALSE	TRUE	predict1899	predict18992
75	0.05324	-1.35883	-0.111905	5.54258	2.00139	35.7482	9.83472	UK Average	0.864467	1.26889	45.1225	F	20.5994	MZ	5.9	FALSE	TRUE	predict1899	predict18992
73.75	-0.013501	-0.656052	-0.345238	4.93689	0.001389	44.6368	9.50139	UK Average	0.957366	0.761944	45.1225	F	20.5994	MZ	5.86667	FALSE	FALSE	predict1899	predict18992
70.5	0.014417	-0.054663	-0.161905	2.46863	0.001389	25.8278	12.0014	High Fibre	0.948793	2.15472	45.1225	F	20.5994	MZ	5.78333	FALSE	FALSE	predict1899	predict18992
58.75	-0.012029	0.656448	-0.311905	5.5572	0.001389	36.4576	6.83472	High Protein	0.738109	1.05889	45.1225	F	20.5994	MZ	5.75	FALSE	FALSE	predict1899	predict18992
50	-0.018528	-0.443552	-0.528571	1.655	1.50139	30.393	11.3347	High Fat	0.772744	0.841389	45.1225	F	20.5994	MZ	5.71667	FALSE	FALSE	predict1899	predict18992
78.5	-0.010161	-0.71498	-0.228571	3.9509	2.50139	98.142	7.83472	High Fat	0.689876	0.461389	44.8214	F	45.6328	MZ	6.86667	FALSE	FALSE	predict1925	predict19251
75.6667	0.040366	-0.566369	-1.02857	4.55982	2.33472	31.6962	7.83472	MCB	0.881659	1.07806	44.8214	F	45.6328	MZ	6.83333	FALSE	FALSE	predict1925	predict19251
66.75	-0.044185	-0.35248	-0.628571	4.26734	2.33472	25.0622	7.33472	High Carb	1.16579	0.964167	44.8214	F	45.6328	MZ	6.8	FALSE	FALSE	predict1925	predict19251
77.75	-0.015643	-0.617758	-0.945238	2.53731	1.83472	25.4587	10.8347	High Carb	1.09149	1.31667	44.8214	F	45.6328	MZ	6.76667	FALSE	FALSE	predict1925	predict19251
66.6667	-0.038916	-0.763591	0.071429	2.38288	3.66806	29.6257	10.3347	OGTT	1.41021	0.730833	44.8214	F	45.6328	MZ	6.73333	FALSE	TRUE	predict1925	predict19251
61.5	0.055294	-1.05804	1.77143	1.69914	0.501389	27.0626	10.6681	UK Average	1.2692	0.0669444	44.8214	F	45.6328	MZ	6.68333	FALSE	TRUE	predict1925	predict19251
48.25	0.019542	-0.755258	-0.945238	4.55801	2.00139	27.3919	7.50139	OGTT	1.2706	1.11667	44.8214	F	45.6328	MZ	6.65	FALSE	FALSE	predict1925	predict19251
58	0.022387	0.566964	-0.695238	3.35457	1.66806	58.2688	7.33472	UK Average	0.895057	0.85	44.8214	F	45.6328	MZ	6.61667	FALSE	FALSE	predict1925	predict19251
58	0.013667	-0.398314	-0.945238	0.717388	0.334722	25.3427	12.3347	High Protein	0.811291	1.08333	44.8214	F	45.6328	MZ	6.58333	FALSE	FALSE	predict1925	predict19251
61	0.005054	0.004464	-0.461905	3.14553	2.16806	48.1349	9.33472	High Fibre	0.80666	0.651667	44.8214	F	45.6328	MZ	6.55	FALSE	FALSE	predict1925	predict19251
66	0.014051	-0.088591	-1.02857	1.7868	1.00139	30.7333	7.16806	High Fat	0.649843	1.18194	44.8214	F	45.6328	MZ	6.5	FALSE	FALSE	predict1925	predict19251
77.5	-0.064258	-0.515377	-0.196429	2.60968	0.668056	30.5535	7.83472	High Carb	1.18694	1.39611	44.8214	F	35.4529	MZ	6.8	FALSE	FALSE	predict1925	predict19252
82	0.024469	0.095734	0.053571	2.59465	1.83472	28.1294	13.3347	High Carb	1.14186	1.10528	44.8214	F	35.4529	MZ	6.76667	FALSE	FALSE	predict1925	predict19252
79.5	0.045067	0.911012	1.37024	3.3316	3.50139	34.2443	10.3347	UK Average	1.08144	0.158611	44.8214	F	35.4529	MZ	6.73333	FALSE	TRUE	predict1925	predict19252
62	0.009863	0.752679	1.72024	4.96099	3.33472	40.399	11.3347	OGTT	1.24098	0.164722	44.8214	F	35.4529	MZ	6.68333	FALSE	TRUE	predict1925	predict19252
65	-0.034044	-0.13621	-0.163095	2.80268	0.168056	46.8487	10.8347	OGTT	1.31018	1.245	44.8214	F	35.4529	MZ	6.65	FALSE	FALSE	predict1925	predict19252
76.6667	0.031845	-0.552877	-0.329762	1.1123	1.83472	38.13	12.0014	UK Average	1.04999	1.37778	44.8214	F	35.4529	MZ	6.61667	FALSE	FALSE	predict1925	predict19252
57.25	0.012787	-0.558432	-0.296429	2.29327	0.668056	33.0787	12.8347	High Fat	0.613914	1.53	44.8214	F	35.4529	MZ	6.58333	FALSE	FALSE	predict1925	predict19252
78	0.022433	-0.690377	-0.429762	4.24685	0.001389	36.7444	11.8347	High Fibre	1.06069	1.45556	44.8214	F	35.4529	MZ	6.55	FALSE	FALSE	predict1925	predict19252
75.5	0.03023	-0.247321	-0.529762	3.75205	0.501389	36.11	11.0014	High Protein	0.798566	1.60528	44.8214	F	35.4529	MZ	6.5	FALSE	FALSE	predict1925	predict19252
52.5	-0.076206	-2.16399	-1.86309	3.65526	3.50139	38.8446	13.3347	MCB	0.778956	3.22167	44.8214	F	35.4529	MZ	6.46667	FALSE	TRUE	predict1925	predict19252
68.5	-0.056097	1.27034	0.622619	4.831	1.16806	67.1072	10.3347	High Fat	0.772287	3.47667	46.5133	F	28.5765	MZ	7.06667	FALSE	FALSE	predict1940	predict19401
55.5	0.009313	1.67173	0.255952	5.61359	1.16806	25.3123	7.83472	High Carb	1.01276	3.58639	46.5133	F	28.5765	MZ	7.08333	FALSE	FALSE	predict1940	predict19401
75	0.019927	0.189782	-0.727381	6.81433	0.834722	100.177	6.66806	High Carb	1.0002	3.28333	46.5133	F	28.5765	MZ	7.11667	FALSE	FALSE	predict1940	predict19401
62	-0.036777	-0.001885	0.955952	10.6233	1.83472	48.9696	13.0014	UK Average	1.1277	1.4975	46.5133	F	28.5765	MZ	7.15	FALSE	TRUE	predict1940	predict19401
43.25	0.020495	-0.872718	-1.56071	8.50739	0.001389	111.963	6.66806	OGTT	1.16082	1.64611	46.5133	F	28.5765	MZ	7.18333	FALSE	TRUE	predict1940	predict19401
59.5	0.035369	-1.10883	-0.610714	7.18343	0.001389	67.6804	8.66806	UK Average	1.09411	3.79028	46.5133	F	28.5765	MZ	7.2	FALSE	FALSE	predict1940	predict19401
20	-0.069277	0.824504	1.30595	8.43013	3.33472	100.659	5.83472	OGTT	1.613	-2.58889	46.5133	F	28.5765	MZ	7.23333	FALSE	FALSE	predict1940	predict19401
59.75	-0.016053	0.905059	1.45595	8.69998	0.668056	26.3108	8.33472	High Fibre	1.03085	1.0725	46.5133	F	28.5765	MZ	7.26667	FALSE	FALSE	predict1940	predict19401
62.75	0.014831	-1.34494	-0.694048	7.78946	0.001389	33.5326	12.8347	High Protein	0.7371	4.73222	46.5133	F	28.5765	MZ	7.28333	FALSE	FALSE	predict1940	predict19401
57.5	0.009822	-0.022718	0.822619	11.6888	2.00139	90.2613	4.83472	High Protein	0.818303	1.55722	46.5133	F	28.5765	MZ	7.31667	FALSE	FALSE	predict1940	predict19401
71	0.039064	0.773612	0.85	1.64215	0.334722	33.8829	7.16806	MCB	0.537911	1.89944	48.9309	F	23.5735	MZ	6.46667	FALSE	TRUE	predict1961	predict19611
85	-0.014589	-0.041667	0.983333	4.15907	0.001389	52.192	8.50139	High Carb	1.04284	1.16722	48.9309	F	23.5735	MZ	6.43333	FALSE	TRUE	predict1961	predict19611
86	-0.01859	-0.083334	-0.25	2.55406	0.501389	63.4692	9.00139	High Carb	1.4135	2.81583	48.9309	F	23.5735	MZ	6.4	FALSE	FALSE	predict1961	predict19611
81	0.009048	0.031944	-0.016667	4.83345	0.834722	46.2489	11.0014	UK Average	0.96532	2.94056	48.9309	F	23.5735	MZ	6.35	FALSE	FALSE	predict1961	predict19611
73	0.008669	0.116667	-0.383333	4.99069	0.001389	37.8609	10.6681	OGTT	0.79212	1.41	48.9309	F	23.5735	MZ	6.31667	FALSE	FALSE	predict1961	predict19611
86	0.046325	0.184723	-0.25	3.76699	0.001389	33.5598	6.66806	UK Average	1.1698	2.65111	48.9309	F	23.5735	MZ	6.25	FALSE	FALSE	predict1961	predict19611
85	-0.01293	-0.759723	-0.533333	3.31143	0.001389	25.7246	7.00139	High Protein	0.214916	3.06778	48.9309	F	23.5735	MZ	6.2	FALSE	TRUE	predict1961	predict19611
89	-0.014038	0.605556	-0.366667	3.32974	0.168056	64.5106	8.16806	High Fibre	1.23848	2.91306	48.9309	F	23.5735	MZ	6.13333	FALSE	FALSE	predict1961	predict19611
52.75	-0.028096	1.6876	1.54048	1.71182	0.168056	37.9318	9.50139	MCB	0.318912	0.436111	48.9309	F	22.3398	MZ	6.46667	FALSE	TRUE	predict1961	predict19612
75	0.025888	-0.923512	-0.87619	1.68085	0.001389	48.8596	9.16806	High Carb	0.800338	1.43778	48.9309	F	22.3398	MZ	6.43333	FALSE	TRUE	predict1961	predict19612
65.5	-0.025572	0.465377	0.190476	4.18805	1.33472	106.612	6.66806	High Carb	0.72458	1.35583	48.9309	F	22.3398	MZ	6.4	FALSE	FALSE	predict1961	predict19612
59.75	0.024081	-0.680457	-0.642857	1.77212	0.001389	50.5786	6.83472	UK Average	0.70235	2.81667	48.9309	F	22.3398	MZ	6.35	FALSE	FALSE	predict1961	predict19612
59.25	0.025652	-0.269346	-0.392857	2.39694	0.001389	57.4078	10.5014	UK Average	0.750721	2.46694	48.9309	F	22.3398	MZ	6.31667	FALSE	FALSE	predict1961	predict19612
53.25	-0.030924	0.044543	0.07381	3.72501	1.16806	50.7908	6.83472	OGTT	0.832041	1.63083	48.9309	F	22.3398	MZ	6.28333	FALSE	FALSE	predict1961	predict19612
49.75	-0.104949	-0.049901	0.140476	4.33202	0.001389	46.9603	11.6681	OGTT	0.999392	0.943333	48.9309	F	22.3398	MZ	6.25	FALSE	FALSE	predict1961	predict19612
55	-0.01483	-1.00962	0.22381	2.87686	0.001389	52.2794	7.66806	High Protein	0.561056	1.20444	48.9309	F	22.3398	MZ	6.16667	FALSE	TRUE	predict1961	predict19612
47.75	-0.049035	0.813988	0.757143	3.08449	0.001389	107.964	8.66806	High Fibre	1.08546	1.35556	48.9309	F	22.3398	MZ	6.13333	FALSE	FALSE	predict1961	predict19612
66	0.044502	-2.48671	-1.05357	2.79052	1.16806	45.4283	10.1681	High Fat	0.612705	3.16694	52.5695	F	25.6481	DZ	6.86667	TRUE	FALSE	predict2032	predict20322
83	0.019425	-0.165873	0.146429	3.92941	0.001389	34.1932	10.1681	High Fat	0.938484	1.86167	52.5695	F	25.6481	DZ	6.9	TRUE	FALSE	predict2032	predict20322
70.6667	-0.022471	-0.081151	-0.553571	4.33851	2.16806	35.1588	10.5014	High Carb	1.60742	2.76667	52.5695	F	25.6481	DZ	6.91667	TRUE	FALSE	predict2032	predict20322
77.75	-0.042322	2.12163	1.04643	5.35626	3.83472	52.5895	12.5014	High Carb	0.915011	0.754722	52.5695	F	25.6481	DZ	6.95	TRUE	TRUE	predict2032	predict20322
72.75	-0.010516	0.918849	2.74643	5.42194	0.834722	70.4511	8.83472	UK Average	0.852833	0.308889	52.5695	F	25.6481	DZ	6.98333	TRUE	TRUE	predict2032	predict20322
73.5	-0.036009	1.78968	-0.303571	3.26113	0.001389	37.5679	12.6681	OGTT	1.6942	0.882778	52.5695	F	25.6481	DZ	7	TRUE	FALSE	predict2032	predict20322
74	0.017542	-0.689484	-0.903571	4.2168	0.001389	32.0907	9.16806	UK Average	1.03469	1.39611	52.5695	F	25.6481	DZ	7.03333	TRUE	FALSE	predict2032	predict20322
45.75	-0.009429	0.718849	-0.070238	6.09315	0.668056	32.7875	12.0014	OGTT	1.2898	0.570833	52.5695	F	25.6481	DZ	7.05	TRUE	FALSE	predict2032	predict20322
76.5	-0.008453	0.098016	0.113095	6.60278	1.33472	38.1904	9.33472	High Protein	0.736222	0.533611	52.5695	F	25.6481	DZ	7.08333	TRUE	FALSE	predict2032	predict20322
75	0.00212	-0.490873	-0.136905	5.20568	1.66806	41.4451	6.33472	High Fibre	1.1234	0.818889	52.5695	F	25.6481	DZ	7.11667	TRUE	FALSE	predict2032	predict20322
64.6667	0.032285	1.03413	0.513095	4.25207	0.168056	59.5587	10.8347	High Protein	0.640611	0.650278	52.5695	F	25.6481	DZ	7.13333	TRUE	TRUE	predict2032	predict20322
40.3333	0.035457	0.046048	-0.047436	6.5303	3.16806	23.8093	13.0014	MCB	1.04168	2.35917	59.0554	F	34.6045	DZ	7.85	FALSE	FALSE	predict2036	predict20361
64	0.010576	1.25994	-0.347436	3.45441	1.83472	20.5635	8.33472	High Carb	1.18141	2.44194	59.0554	F	34.6045	DZ	7.83333	FALSE	FALSE	predict2036	predict20361
49	-0.003434	0.65577	0.085897	3.83012	1.50139	20.8238	8.33472	High Carb	1.10468	2.29611	59.0554	F	34.6045	DZ	7.8	FALSE	FALSE	predict2036	predict20361
25	-0.018971	-1.00117	0.702564	4.26053	2.50139	21.1028	9.00139	UK Average	1.19654	1.27889	59.0554	F	34.6045	DZ	7.78333	FALSE	TRUE	predict2036	predict20361
17.5	-0.059258	-2.10951	-2.18077	3.98199	1.83472	34.4201	10.1681	OGTT	1.36134	4.33028	59.0554	F	34.6045	DZ	7.76667	FALSE	TRUE	predict2036	predict20361
31.6667	-0.108306	-1.28729	-2.23077	7.56579	-5.83194	14.5572	13.0014	OGTT	1.84588	4.58694	59.0554	F	34.6045	DZ	7.73333	FALSE	FALSE	predict2036	predict20361
54	-0.033412	1.36271	1.30256	3.85349	1.83472	33.8628	13.3347	High Fat	0.734496	0.872222	59.0554	F	34.6045	DZ	7.7	FALSE	FALSE	predict2036	predict20361
33	0.047022	-1.65812	-1.19744	3.22742	2.83472	34.4534	9.50139	High Fibre	1.24372	3.18278	59.0554	F	34.6045	DZ	7.66667	FALSE	FALSE	predict2036	predict20361
36	0.040175	-2.43451	-0.064103	7.87183	-7.99861	27.35	8.50139	High Protein	0.938179	2.35139	59.0554	F	34.6045	DZ	7.65	FALSE	FALSE	predict2036	predict20361
84.5	-0.0138	0.140179	0.280952	3.45525	1.16806	44.4691	8.00139	MCB	0.647553	0.669444	59.0554	F	29.3744	DZ	7.85	FALSE	FALSE	predict2036	predict20362
76	0.044264	-0.232043	0.014286	2.40161	1.83472	45.2288	7.83472	High Carb	0.989138	0.934722	59.0554	F	29.3744	DZ	7.83333	FALSE	FALSE	predict2036	predict20362
78.5	0.006818	-1.5751	-1.05238	3.29976	0.334722	40.2993	10.0014	High Carb	1.01527	1.18083	59.0554	F	29.3744	DZ	7.8	FALSE	FALSE	predict2036	predict20362
75	-0.00374	-0.138988	-0.685714	3.87942	0.501389	46.6565	7.33472	UK Average	0.849489	0.643333	59.0554	F	29.3744	DZ	7.78333	FALSE	TRUE	predict2036	predict20362
81.6667	0.030424	0.352679	0.364286	3.4145	2.00139	58.9203	7.16806	UK Average	0.879746	0.669444	59.0554	F	29.3744	DZ	7.76667	FALSE	TRUE	predict2036	predict20362
59.5	0.023052	-3.13343	-4.23571	6.02486	0.001389	49.393	7.50139	OGTT	1.1087	4.99333	59.0554	F	29.3744	DZ	7.73333	FALSE	FALSE	predict2036	predict20362
68	0.026675	0.448512	0.414286	5.19014	0.501389	46.5919	8.33472	OGTT	1.06092	1.24861	59.0554	F	29.3744	DZ	7.71667	FALSE	FALSE	predict2036	predict20362
87	-0.064696	1.05407	1.24762	4.45658	0.168056	37.0013	10.5014	High Fibre	0.861088	-0.248333	59.0554	F	29.3744	DZ	7.7	FALSE	FALSE	predict2036	predict20362
58	-0.057124	-3.19871	-3.00238	6.26319	2.33472	54.3285	7.83472	High Protein	0.853922	4.19167	59.0554	F	29.3744	DZ	7.66667	FALSE	FALSE	predict2036	predict20362
68	-0.009472	-0.369543	-0.302381	3.9599	0.501389	55.768	8.00139	High Fat	0.567788	0.395833	59.0554	F	29.3744	DZ	7.65	FALSE	FALSE	predict2036	predict20362
67.5	0.003099	1.85575	-0.867857	2.56604	0.001389	35.5677	9.33472	MCB	0.864852	2.86833	48.4873	F	23.5848	MZ	5.68333	FALSE	TRUE	predict2043	predict20432
95.25	0.03256	-0.774802	-0.384524	4.72245	2.16806	26.6769	13.3347	OGTT	0.889123	1.51278	48.4873	F	23.5848	MZ	6.56667	TRUE	FALSE	predict2043	predict20432
91.5	-0.00397	-0.791469	0.132143	4.18875	2.00139	32.5284	9.66806	OGTT	0.477998	1.40167	48.4873	F	23.5848	MZ	6.48333	TRUE	FALSE	predict2043	predict20432
81.5	-0.033899	-0.51508	-0.317857	3.16366	0.001389	30.4455	11.8347	UK Average	0.920812	1.29028	48.4873	F	23.5848	MZ	6.45	TRUE	FALSE	predict2043	predict20432
92.25	0.015536	0.751587	1.13214	3.27256	4.50139	41.327	8.00139	High Fibre	0	2.10306	48.4873	F	23.5848	MZ	6.41667	TRUE	TRUE	predict2043	predict20432
85.3333	0.002081	1.97103	2.21548	3.36147	4.66806	32.3342	10.0014	High Protein	0.695438	0.186111	48.4873	F	23.5848	MZ	6.38333	TRUE	TRUE	predict2043	predict20432
90.5	-0.006268	-0.176191	-0.517857	3.31508	1.83472	42.1856	10.1681	High Fat	0.3057	0.641667	48.4873	F	23.5848	MZ	6.33333	TRUE	FALSE	predict2043	predict20432
61.75	0.027213	-0.649603	-0.625	3.40771	0.834722	24.0048	10.6681	MCB	1.14193	2.31694	46.9514	F	41.057	DZ	7.96667	FALSE	FALSE	predict2056	predict20561
54.3333	-0.012678	0.593452	-0.625	2.80482	1.00139	22.9532	11.5014	High Carb	1.30332	2.34028	46.9514	F	41.057	DZ	7.95	FALSE	FALSE	predict2056	predict20561
58.6667	-0.01429	-1.05933	-0.625	2.42823	1.00139	25.9294	12.0014	High Carb	1.16778	1.99611	46.9514	F	41.057	DZ	7.93333	FALSE	FALSE	predict2056	predict20561
50.5	0.009637	0.779563	0.541667	2.23519	1.66806	17.8407	6.83472	OGTT	1.56735	0.532222	46.9514	F	41.057	DZ	7.91667	FALSE	TRUE	predict2056	predict20561
49.75	-0.031432	1.35456	1.69167	4.37684	3.33472	43.0981	7.83472	UK Average	1.03507	0.273611	46.9514	F	41.057	DZ	7.9	FALSE	TRUE	predict2056	predict20561
50.75	-0.036852	-1.10655	-0.625	3.51306	1.00139	52.6782	9.33472	OGTT	1.65437	2.17667	46.9514	F	41.057	DZ	7.88333	FALSE	FALSE	predict2056	predict20561
53.6667	0.033545	-1.11488	-0.625	2.55201	0.001389	25.1956	11.6681	UK Average	1.06382	2.21417	46.9514	F	41.057	DZ	7.86667	FALSE	FALSE	predict2056	predict20561
65	0.014119	-0.894048	-0.608333	3.71731	0.001389	24.4635	10.6681	High Protein	0.808145	2.19889	46.9514	F	41.057	DZ	7.85	FALSE	FALSE	predict2056	predict20561
55.6667	-0.017818	0.649008	0.608333	3.17423	1.00139	26.0494	11.1681	High Fat	0.839796	0.9375	46.9514	F	41.057	DZ	7.83333	FALSE	FALSE	predict2056	predict20561
60.75	-0.005813	-1.06071	-0.608333	2.66806	0.834722	25.8799	8.83472	High Fibre	1.17498	2.17361	46.9514	F	41.057	DZ	7.8	FALSE	FALSE	predict2056	predict20561
58	0.003825	-1.03304	-0.839286	4.46495	1.33472	28.088	6.00139	MCB	0.602665	2.29028	46.9514	F	29.2423	DZ	7.96667	FALSE	FALSE	predict2056	predict20562
56.2	-0.032233	-0.783036	-1.87262	4.31244	0.001389	26.1051	8.00139	High Carb	0.795585	0.532778	46.9514	F	29.2423	DZ	7.95	FALSE	FALSE	predict2056	predict20562
63.75	-0.022185	-0.356647	-0.789286	3.43193	0.168056	23.1053	9.16806	High Carb	0.899046	2.10889	46.9514	F	29.2423	DZ	7.93333	FALSE	FALSE	predict2056	predict20562
67	0.020112	1.25585	1.29405	4.33218	1.16806	31.8067	9.66806	OGTT	0.83764	0.782778	46.9514	F	29.2423	DZ	7.91667	FALSE	TRUE	predict2056	predict20562
56.6667	0.010164	0.930853	1.06071	4.2473	0.668056	21.0115	8.16806	UK Average	0.704711	0.589722	46.9514	F	29.2423	DZ	7.9	FALSE	TRUE	predict2056	predict20562
63.6667	-0.012746	-0.612202	-0.905952	2.17624	0.501389	29.9082	8.83472	UK Average	1.06114	2.31167	46.9514	F	29.2423	DZ	7.88333	FALSE	FALSE	predict2056	predict20562
66.75	0.045762	-0.608036	-0.805952	2.89242	1.00139	26.7828	6.33472	OGTT	1.16833	2.20056	46.9514	F	29.2423	DZ	7.86667	FALSE	FALSE	predict2056	predict20562
58	0.025248	-0.437202	-0.772619	2.60518	0.001389	24.3784	6.33472	High Protein	0.700094	2.3175	46.9514	F	29.2423	DZ	7.85	FALSE	FALSE	predict2056	predict20562
57.3333	0.013214	-0.287202	-0.739286	2.84115	0.001389	23.4563	10.0014	High Fat	0.872881	2.03639	46.9514	F	29.2423	DZ	7.83333	FALSE	FALSE	predict2056	predict20562
60.5	0.016993	-0.770536	-0.739286	4.26015	0.834722	21.1615	11.1681	High Fibre	1.15905	2.06417	46.9514	F	29.2423	DZ	7.8	FALSE	FALSE	predict2056	predict20562
82	0.057481	-0.915064	0.080769	3.83565	0.001389	51.6607	6.50139	High Fat	0.500201	2.18083	35.3402	F	25.2342	MZ	6.45	TRUE	FALSE	predict2059	predict20591
86.75	-0.048404	0.933547	0.480769	2.01955	1.83472	66.1483	9.00139	MCB	0.589552	1.69833	35.3402	F	25.2342	MZ	6.41667	TRUE	TRUE	predict2059	predict20591
86.25	-0.030015	1.5141	0.464103	2.10703	0.001389	68.4774	9.33472	High Carb	1.09531	1.425	35.3402	F	25.2342	MZ	6.38333	TRUE	TRUE	predict2059	predict20591
98.5	-0.089002	-0.035897	-0.952564	1.95945	0.001389	43.4403	12.8347	High Carb	1.22537	3.24	35.3402	F	25.2342	MZ	6.33333	TRUE	FALSE	predict2059	predict20591
87.75	0.045575	-0.727564	-1.2359	1.06556	0.168056	39.2477	13.5014	OGTT	0.996786	2.45806	35.3402	F	25.2342	MZ	6.3	TRUE	FALSE	predict2059	predict20591
96.3333	0.035492	-1.45256	-1.21923	4.90992	11.1681	49.5475	5.33472	UK Average	0.954451	3.45528	35.3402	F	25.2342	MZ	6.26667	TRUE	FALSE	predict2059	predict20591
24	-0.097069	-2.12895	1.99744	37.1173	1.50139	53.3292	12.5	High Protein	0.49693	0.453056	35.3402	F	25.2342	MZ	6.15	TRUE	TRUE	predict2059	predict20591
51.75	0.025422	1.73077	1.98077	22.6794	8.66806	80.321	13.8347	High Fibre	0.917432	0.464167	35.3402	F	25.2342	MZ	6.11667	TRUE	TRUE	predict2059	predict20591
79	0.00099	-0.438675	-0.619231	21.5137	0.168056	101.586	13.8347	High Fat	0.283627	2.98361	35.3402	F	25.2342	MZ	6.08333	TRUE	FALSE	predict2059	predict20591
77.5	0.010373	-2.17415	-1.08974	2.34789	3.50139	44.9352	11.5014	High Fat	0.641015	1.33333	63.7098	F	28.6846	DZ	5.98333	TRUE	FALSE	predict2082	predict20821
80	0.016488	-0.300534	-0.223077	1.41844	3.33472	51.7516	9.83472	MCB	0.732614	0.631944	63.7098	F	28.6846	DZ	5.95	TRUE	FALSE	predict2082	predict20821
71.3333	0.001921	0.238355	-0.139744	2.28584	0.834722	47.4948	11.3347	High Carb	0.920535	0.548611	63.7098	F	28.6846	DZ	5.9	TRUE	TRUE	predict2082	predict20821
84.3333	-0.059651	3.09669	2.89359	1.5706	4.50139	36.6244	11.5014	UK Average	1.07454	-0.772222	63.7098	F	28.6846	DZ	5.83333	TRUE	FALSE	predict2082	predict20821
82.3333	0.024146	1.22308	1.76026	8.4398	1.83472	49.2085	12.0014	UK Average	0.838023	0.265278	63.7098	F	28.6846	DZ	5.8	TRUE	FALSE	predict2082	predict20821
79	0.001933	-1.15748	-1.07308	2.73824	3.66806	40.9934	7.50139	OGTT	1.11592	0.265278	63.7098	F	28.6846	DZ	5.76667	TRUE	FALSE	predict2082	predict20821
74.25	-0.027891	0.717522	0.626923	0.581653	0.668056	34.6026	9.33472	OGTT	1.00583	0.0555556	63.7098	F	28.6846	DZ	5.73333	TRUE	FALSE	predict2082	predict20821
83.75	0.024952	-0.4422	-0.473077	2.17201	1.00139	34.2648	9.00139	High Fibre	1.03914	0.618333	63.7098	F	28.6846	DZ	5.7	TRUE	FALSE	predict2082	predict20821
78	-0.005791	0.866133	0.24359	3.29308	2.16806	39.6943	13.8347	High Protein	0.546895	0.819722	63.7098	F	28.6846	DZ	5.63333	TRUE	TRUE	predict2082	predict20821
53.5	0.036843	-1.74498	-0.128205	2.44165	2.00139	42.7651	8.16806	High Fat	0.368437	1.25861	63.7098	F	23.7943	DZ	5.98333	TRUE	FALSE	predict2082	predict20822
85.75	0.029278	0.224466	0.088462	2.45014	0.001389	42.5502	8.16806	MCB	0.743645	1.03694	63.7098	F	23.7943	DZ	5.95	TRUE	FALSE	predict2082	predict20822
88	0.002553	0.495299	0.655128	2.7021	2.66806	36.2333	8.50139	High Carb	0.898309	0.478333	63.7098	F	23.7943	DZ	5.9	TRUE	TRUE	predict2082	predict20822
75	0.029244	0.049466	0.338462	3.02303	2.83472	54.8698	8.33472	High Carb	0.954002	0.783611	63.7098	F	23.7943	DZ	5.86667	TRUE	TRUE	predict2082	predict20822
76.6	0.01759	0.625855	0.555128	2.43162	0.001389	49.576	9.66806	OGTT	1.03615	0.563056	63.7098	F	23.7943	DZ	5.83333	TRUE	FALSE	predict2082	predict20822
74.3333	-0.014962	-1.75748	-1.6282	2.58985	0.334722	34.5145	8.16806	UK Average	0.848571	1.87472	63.7098	F	23.7943	DZ	5.8	TRUE	FALSE	predict2082	predict20822
80.25	-0.104719	0.350855	-1.4782	2.14387	0.668056	37.9416	8.33472	UK Average	0.609748	1.74306	63.7098	F	23.7943	DZ	5.76667	TRUE	FALSE	predict2082	predict20822
71.75	-0.049127	2.09808	0.171795	3.2509	2.83472	28.2563	8.16806	OGTT	1.02279	0.810833	63.7098	F	23.7943	DZ	5.73333	TRUE	FALSE	predict2082	predict20822
77	-0.006636	-0.439423	0.105128	3.14624	0.001389	50.4206	8.33472	High Protein	0.736828	1.02889	63.7098	F	23.7943	DZ	5.7	TRUE	FALSE	predict2082	predict20822
77	0.020402	-0.407478	0.105128	3.91703	0.334722	31.442	8.16806	High Fibre	0.861098	0.764444	63.7098	F	23.7943	DZ	5.63333	TRUE	TRUE	predict2082	predict20822
65	0.006182	-0.024305	-0.05	4.44051	1.83472	43.54	9.16806	High Carb	0.709724	2.18778	42.7817	F	21.7912	MZ	6.16667	FALSE	TRUE	predict2095	predict20951
89	0.028407	-1.3493	-0.366667	7.72605	1.83472	39.729	7.16806	UK Average	0.484917	1.97	42.7817	F	21.7912	MZ	6.1	FALSE	FALSE	predict2095	predict20951
68.5	0.026999	-0.772916	-0.3	5.10429	0.001389	58.161	6.83472	OGTT	0.429931	2.675	42.7817	F	21.7912	MZ	6.05	FALSE	FALSE	predict2095	predict20951
86	-0.013116	-0.467361	-0.3	2.83593	1.33472	56.7655	8.83472	UK Average	0.620015	1.83306	42.7817	F	21.7912	MZ	6.01667	FALSE	FALSE	predict2095	predict20951
52.5	-0.052506	-0.399305	-0.416667	4.10754	0.001389	48.6666	9.00139	OGTT	0.719272	2.46833	42.7817	F	21.7912	MZ	5.98333	FALSE	FALSE	predict2095	predict20951
47	-0.017115	-0.36875	0.35	3.38355	1.50139	45.9991	11.6681	High Protein	0.34455	0.461389	42.7817	F	21.7912	MZ	5.95	FALSE	TRUE	predict2095	predict20951
53	0.016608	0.082639	0.6	3.8054	0.668056	55.9637	8.33472	High Fat	0.571189	0.303056	42.7817	F	21.7912	MZ	5.9	FALSE	TRUE	predict2095	predict20951
77.3333	-0.013877	0.427084	-0.35	3.12621	1.00139	59.3768	8.33472	High Fibre	0.588006	2.67	42.7817	F	21.7912	MZ	5.86667	FALSE	FALSE	predict2095	predict20951
56.5	0.006166	-0.601587	0.196429	2.31333	0.501389	17.7635	6.16806	High Fat	0.655167	1.15583	57.1636	F	30.7181	DZ	6.91667	FALSE	FALSE	predict2102	predict21021
62.5	-0.027546	1.2623	-0.020238	3.28782	0.001389	27.7443	9.16806	High Carb	1.09481	0.9625	57.1636	F	30.7181	DZ	6.95	FALSE	TRUE	predict2102	predict21021
57	-0.015327	0.074802	1.4631	4.36849	2.33472	22.0449	8.66806	High Carb	1.10076	0.722222	57.1636	F	30.7181	DZ	6.96667	FALSE	TRUE	predict2102	predict21021
63	0.017851	-1.30992	-1.95357	2.86963	0.001389	21.5937	10.6681	UK Average	1.04508	3.4625	57.1636	F	30.7181	DZ	7	FALSE	FALSE	predict2102	predict21021
8	0.007863	-0.066865	-0.070238	3.18393	1.16806	40.0308	8.33472	OGTT	1.29742	0.0891667	57.1636	F	30.7181	DZ	7.03333	FALSE	FALSE	predict2102	predict21021
21.3333	0.016764	0.360913	-0.086905	3.51835	0.001389	32.9709	7.83472	OGTT	1.46449	0.111389	57.1636	F	30.7181	DZ	7.06667	FALSE	FALSE	predict2102	predict21021
25	0.032469	-0.898809	0.179762	2.42105	1.16806	32.7134	8.00139	UK Average	0.881849	0.964167	57.1636	F	30.7181	DZ	7.08333	FALSE	FALSE	predict2102	predict21021
40	-0.004351	-0.015476	0.596429	3.60356	0.334722	37.2625	8.00139	High Protein	0.692825	0.469444	57.1636	F	30.7181	DZ	7.11667	FALSE	FALSE	predict2102	predict21021
60.5	-0.008148	-1.24603	-0.786905	3.1444	1.33472	30.4242	8.00139	High Fibre	1.16837	2.39611	57.1636	F	30.7181	DZ	7.15	FALSE	TRUE	predict2102	predict21021
57	-0.068262	0.192857	0.979762	3.23731	0.001389	19.5809	11.3347	High Protein	0.758244	0.215556	57.1636	F	30.7181	DZ	7.18333	FALSE	TRUE	predict2102	predict21021
51	-0.040221	-0.363294	-0.139286	2.57495	0.668056	35.6282	8.50139	High Fat	0.923022	1.11389	57.1636	F	26.8402	DZ	6.91667	FALSE	FALSE	predict2102	predict21022
80	0.02492	-1.67024	-0.372619	4.69751	0.334722	47.4245	6.00139	High Carb	0.799413	1.58333	57.1636	F	26.8402	DZ	6.95	FALSE	TRUE	predict2102	predict21022
51	-0.023406	0.322817	1.72738	2.97216	0.001389	31.3653	8.50139	High Carb	0.733519	0.701667	57.1636	F	26.8402	DZ	6.96667	FALSE	TRUE	predict2102	predict21022
48.6667	0.007418	-0.017461	-0.089286	1.80381	0.501389	37.4947	8.00139	UK Average	0.583514	0.165278	57.1636	F	26.8402	DZ	7	FALSE	FALSE	predict2102	predict21022
60	0.005628	-0.499405	0.144048	1.79483	0.001389	37.4545	12.5014	OGTT	1.11414	0.215556	57.1636	F	26.8402	DZ	7.03333	FALSE	FALSE	predict2102	predict21022
56.3333	-0.021237	0.857539	0.444048	2.43034	0.668056	20.2731	8.66806	UK Average	0.7744	-0.328889	57.1636	F	26.8402	DZ	7.06667	FALSE	FALSE	predict2102	predict21022
51	0.031005	-0.814683	-0.522619	3.81215	0.501389	33.8402	9.16806	OGTT	1.1719	0.138889	57.1636	F	26.8402	DZ	7.08333	FALSE	FALSE	predict2102	predict21022
55.5	0.0075	0.040873	-0.172619	4.20748	0.001389	34.1068	7.00139	High Fibre	0.915205	0.166944	57.1636	F	26.8402	DZ	7.11667	FALSE	FALSE	predict2102	predict21022
23	-0.004939	0.421428	0.310714	2.33831	0.001389	28.4395	6.66806	High Protein	0.591983	0.393333	57.1636	F	26.8402	DZ	7.15	FALSE	TRUE	predict2102	predict21022
79	-0.007429	0.296428	-0.339286	5.12649	0.001389	25.3163	10.5014	High Protein	0.607693	0.290556	57.1636	F	26.8402	DZ	7.18333	FALSE	TRUE	predict2102	predict21022
52.6667	0.003494	-0.719146	-0.813095	2.78318	0.668056	31.8896	12.0014	MCB	0.912587	1.28472	46.9213	F	25.0508	MZ	6.58333	FALSE	FALSE	predict2104	predict21041
48.3333	-0.011395	-0.592758	-0.813095	4.2012	0.168056	43.2969	9.16806	High Carb	0.769866	0.544444	46.9213	F	25.0508	MZ	6.55	FALSE	FALSE	predict2104	predict21041
43	0.006294	-1.60526	-0.779762	4.351	1.16806	41.9977	9.83472	High Carb	1.01274	0.4975	46.9213	F	25.0508	MZ	6.5	FALSE	FALSE	predict2104	predict21041
28.25	-0.001183	1.72947	0.386905	4.14435	0.001389	34.8236	7.00139	UK Average	0.757272	0.294444	46.9213	F	25.0508	MZ	6.46667	FALSE	TRUE	predict2104	predict21041
35	-0.035713	-0.613591	0.053571	4.35833	1.00139	37.2959	9.00139	OGTT	0.88699	0.204167	46.9213	F	25.0508	MZ	6.43333	FALSE	TRUE	predict2104	predict21041
30	0.029563	0.462798	-0.446429	5.05357	0.001389	42.333	10.8347	OGTT	0.720732	0.683333	46.9213	F	25.0508	MZ	6.4	FALSE	FALSE	predict2104	predict21041
46.75	0.018453	0.878076	-0.196429	3.12239	0.501389	42.8413	11.0014	UK Average	0.819852	0.486111	46.9213	F	25.0508	MZ	6.35	FALSE	FALSE	predict2104	predict21041
38	0.014728	-0.141369	-0.779762	3.42502	0.668056	35.5284	11.8347	High Protein	0.3533	1.01556	46.9213	F	25.0508	MZ	6.31667	FALSE	FALSE	predict2104	predict21041
41.3333	-0.002446	0.103076	-0.079762	3.64512	1.66806	42.0953	12.5014	High Fat	0.449709	0.398889	46.9213	F	25.0508	MZ	6.28333	FALSE	FALSE	predict2104	predict21041
39.25	-0.030866	-0.359424	-0.379762	2.82204	1.33472	38.7638	9.66806	High Fibre	0.706565	0.630833	46.9213	F	25.0508	MZ	6.25	FALSE	FALSE	predict2104	predict21041
53.75	0.019649	0.153571	-0.416667	3.12193	0.668056	49.8023	6.83472	MCB	0.298249	1.06306	46.9213	F	21.8455	MZ	6.58333	FALSE	FALSE	predict2104	predict21042
50	0.02727	-0.672818	-0.9	3.32013	0.334722	45.6448	6.50139	High Carb	0.506201	1.09556	46.9213	F	21.8455	MZ	6.55	FALSE	FALSE	predict2104	predict21042
44.75	0.008197	-0.317262	-1.01667	1.51774	0.834722	47.6723	6.16806	High Carb	0.609583	1.22556	46.9213	F	21.8455	MZ	6.5	FALSE	FALSE	predict2104	predict21042
61.5	0.011862	-0.139484	-0.266667	2.88083	0.501389	47.2887	7.00139	UK Average	0.679659	1.55444	46.9213	F	21.8455	MZ	6.46667	FALSE	TRUE	predict2104	predict21042
43.3333	-0.044655	1.30218	0.733333	2.86838	0.001389	73.6327	7.50139	UK Average	0.85955	1.38222	46.9213	F	21.8455	MZ	6.43333	FALSE	TRUE	predict2104	predict21042
28.75	0.007361	0.24246	0.016667	3.80171	0.001389	54.1711	9.66806	OGTT	0.692765	0.283889	46.9213	F	21.8455	MZ	6.4	FALSE	FALSE	predict2104	predict21042
46.75	0.034864	-0.254762	-0.466667	1.70724	0.001389	51.7363	11.0014	OGTT	0.540931	0.656667	46.9213	F	21.8455	MZ	6.35	FALSE	FALSE	predict2104	predict21042
58	-0.030128	-0.296429	-0.4	2.0377	1.00139	46.3144	10.6681	High Fibre	0.645287	0.589722	46.9213	F	21.8455	MZ	6.31667	FALSE	FALSE	predict2104	predict21042
61.3333	0.028147	-0.824207	-0.783333	1.77293	0.501389	49.3068	11.6681	High Protein	0.496167	0.630833	46.9213	F	21.8455	MZ	6.28333	FALSE	FALSE	predict2104	predict21042
65.5	0.028436	-0.633929	-0.833333	2.27482	0.168056	46.4416	10.8347	High Fat	0.525423	1.12611	46.9213	F	21.8455	MZ	6.25	FALSE	FALSE	predict2104	predict21042
43.25	0.044729	-0.644445	-0.310714	3.89871	0.001389	50.4302	9.66806	High Fat	0.759716	2.21111	57.7796	F	25.8604	DZ	6.55	TRUE	FALSE	predict2108	predict21082
69	-0.100341	1.67639	1.33929	5.48797	0.001389	49.6009	9.16806	High Carb	1.24821	2.08333	57.7796	F	25.8604	DZ	6.56667	TRUE	TRUE	predict2108	predict21082
68	0.003924	2.87778	2.42262	2.9698	1.16806	51.1571	8.00139	High Carb	1.19736	1.07639	57.7796	F	25.8604	DZ	6.6	TRUE	TRUE	predict2108	predict21082
59.5	-0.001751	-0.633333	-0.494048	3.80867	1.16806	47.7726	9.16806	OGTT	1.40883	2.5	57.7796	F	25.8604	DZ	6.63333	TRUE	FALSE	predict2108	predict21082
64.75	0.030415	-0.543056	-0.610714	4.71316	0.001389	56.3907	8.83472	UK Average	1.19665	2.15417	57.7796	F	25.8604	DZ	6.68333	TRUE	FALSE	predict2108	predict21082
53	-0.045258	-0.927778	-0.144048	3.59565	0.834722	50.5395	6.66806	OGTT	1.37387	0.240278	57.7796	F	25.8604	DZ	6.7	TRUE	FALSE	predict2108	predict21082
67	0.019424	-1.30417	-0.160714	2.1326	0.168056	48.0441	11.6681	High Protein	1.01456	1.73333	57.7796	F	25.8604	DZ	6.73333	TRUE	FALSE	predict2108	predict21082
60.5	0.039587	0.302778	-0.760714	3.34543	1.00139	54.7545	8.50139	High Protein	1.32609	3.84722	57.7796	F	25.8604	DZ	6.78333	TRUE	TRUE	predict2108	predict21082
52	0.015847	-0.331304	-0.551282	3.85976	2.33472	32.2207	9.16806	High Fat	1.14858	0.566667	63.6386	F	19.8766	DZ	7.48333	FALSE	FALSE	predict2139	predict21391
36.5	-0.02374	-2.20769	-1.43461	3.89294	1.66806	34.9256	13.3347	High Carb	1.12595	0.580833	63.6386	F	19.8766	DZ	7.53333	FALSE	TRUE	predict2139	predict21391
59.25	-0.033195	-2.29658	-0.251282	2.06675	3.50139	54.8983	8.66806	OGTT	1.35579	0.766667	63.6386	F	19.8766	DZ	7.56667	FALSE	TRUE	predict2139	predict21391
21	0.050666	-2.7313	1.11539	1.99422	2.83472	36.8978	12.5014	UK Average	1.04734	-0.665	63.6386	F	19.8766	DZ	7.61667	FALSE	FALSE	predict2139	predict21391
41.5	-0.065962	1.99508	-0.717949	2.84502	3.83472	25.4006	10.0014	UK Average	1.15345	1.25583	63.6386	F	19.8766	DZ	7.65	FALSE	FALSE	predict2139	predict21391
60	0.046019	0.145933	-0.20119	1.70391	0.001389	40.492	8.66806	MCB	0.732261	0.541667	63.9617	F	20.6366	DZ	6.05	FALSE	FALSE	predict2139	predict21392
54.3333	0.02048	0.538989	0.882143	2.97992	0.334722	44.2109	8.50139	High Carb	1.15133	0.419444	63.9617	F	20.6366	DZ	6.01667	FALSE	FALSE	predict2139	predict21392
61	0.048326	-1.26657	-0.85119	2.74537	0.001389	18.4943	9.50139	High Carb	1.07016	1.19444	63.9617	F	20.6366	DZ	5.98333	FALSE	FALSE	predict2139	predict21392
53.4	0.049739	-1.89296	-0.50119	2.54358	1.00139	75.0794	8.50139	OGTT	1.24762	0.195833	63.9617	F	20.6366	DZ	5.95	FALSE	TRUE	predict2139	predict21392
59.25	0.000545	1.38899	0.49881	2.23527	1.00139	84.4697	10.3347	UK Average	1.02591	0.583333	63.9617	F	20.6366	DZ	5.9	FALSE	TRUE	predict2139	predict21392
56.5	0.000946	-0.308234	0.682143	2.83037	0.834722	70.3189	10.0014	UK Average	0.989407	0.419722	63.9617	F	20.6366	DZ	5.86667	FALSE	FALSE	predict2139	predict21392
67	-0.018301	2.04038	0.54881	3.34597	0.668056	35.5081	9.16806	OGTT	1.35933	0.439444	63.9617	F	20.6366	DZ	5.83333	FALSE	FALSE	predict2139	predict21392
60.6667	-0.082723	1.86954	-0.30119	3.16257	2.83472	38.2182	9.33472	High Fibre	1.10831	0.419167	63.9617	F	20.6366	DZ	5.78333	FALSE	FALSE	predict2139	predict21392
58.3333	0.013988	-1.23323	-1.36786	2.85028	0.168056	46.8933	9.50139	High Fat	0.598824	0.384167	63.9617	F	20.6366	DZ	5.75	FALSE	FALSE	predict2139	predict21392
59.3333	0.010178	-0.704067	-0.217857	2.48938	1.00139	16.341	7.00139	High Protein	0.833735	0.750833	63.9617	F	20.6366	DZ	5.71667	FALSE	FALSE	predict2139	predict21392
54	-0.053188	-3.28016	-1.38452	2.33965	1.83472	46.2749	9.16806	High Fat	1.02263	0.335	54.0972	F	27.9768	MZ	7.28333	FALSE	FALSE	predict2245	predict22451
68.5	0.017592	0.978174	-1.45119	5.37404	1.50139	45.894	7.33472	High Carb	1.41736	0.402778	54.0972	F	27.9768	MZ	7.31667	FALSE	FALSE	predict2245	predict22451
89.5	-0.035745	1.74484	-1.36786	2.1797	1.83472	67.0898	8.66806	High Carb	1.41774	0.3625	54.0972	F	27.9768	MZ	7.35	FALSE	TRUE	predict2245	predict22451
80	0.003707	-0.727381	0.965476	2.7035	4.16806	39.2683	8.66806	UK Average	1.30566	0.401667	54.0972	F	27.9768	MZ	7.38333	FALSE	TRUE	predict2245	predict22451
90	0.020853	-2.67599	-1.40119	2.67507	1.66806	26.304	9.16806	UK Average	1.15313	0.301389	54.0972	F	27.9768	MZ	7.4	FALSE	FALSE	predict2245	predict22451
65.6	0.031489	-1.14544	-2.43452	8.01205	0.501389	41.8017	11.1681	OGTT	1.4909	0.2	54.0972	F	27.9768	MZ	7.46667	FALSE	FALSE	predict2245	predict22451
83	0.032339	-0.356548	-0.284524	1.87121	2.33472	41.901	9.33472	High Fibre	1.21465	0.248611	54.0972	F	27.9768	MZ	7.48333	FALSE	FALSE	predict2245	predict22451
83	0.063426	-1.29544	-0.284524	0.881049	2.16806	38.9098	12.0014	High Protein	1.11691	0.383333	54.0972	F	27.9768	MZ	7.51667	FALSE	FALSE	predict2245	predict22451
62	0.012739	2.01101	0.130952	2.12973	1.16806	42.5077	7.50139	High Fat	0.669704	3.20028	54.0972	F	28.9513	MZ	7.28333	FALSE	FALSE	predict2245	predict22452
65.3333	0.037625	-0.6251	-1.15238	6.07033	0.001389	47.6367	9.50139	High Carb	1.08031	3.0975	54.0972	F	28.9513	MZ	7.31667	FALSE	FALSE	predict2245	predict22452
58	-0.02049	1.08462	0.814286	1.92918	1.33472	48.1066	6.83472	High Carb	1.21775	0.908611	54.0972	F	28.9513	MZ	7.35	FALSE	TRUE	predict2245	predict22452
21.5	0.010091	-1.67232	0.564286	5.70911	1.83472	35.4983	10.6681	OGTT	1.65442	0.36	54.0972	F	28.9513	MZ	7.38333	FALSE	TRUE	predict2245	predict22452
26	0.06881	-2.91677	-2.28571	9.43235	2.00139	30.4291	13.6681	OGTT	1.65147	0.508611	54.0972	F	28.9513	MZ	7.4	FALSE	FALSE	predict2245	predict22452
84.6667	0.009733	1.73185	0.047619	3.71855	0.001389	42.7385	7.16806	UK Average	0.738255	2.35306	54.0972	F	28.9513	MZ	7.43333	FALSE	FALSE	predict2245	predict22452
76	0.000654	-0.513988	0.897619	3.22614	0.668056	46.1145	7.50139	UK Average	0.998764	0.456944	54.0972	F	28.9513	MZ	7.46667	FALSE	FALSE	predict2245	predict22452
87.3333	-0.027304	0.040178	-0.019048	2.59885	0.834722	45.845	10.5014	High Protein	0.574061	2.56278	54.0972	F	28.9513	MZ	7.48333	FALSE	FALSE	predict2245	predict22452
95	0.04706	-3.04038	-0.119048	10.092	1.33472	46.6218	8.16806	High Protein	0.690215	2.49861	54.0972	F	28.9513	MZ	7.51667	FALSE	FALSE	predict2245	predict22452
88	-0.024408	1.13046	-1.26905	6.72028	0.168056	61.0341	7.50139	High Fibre	1.05287	2.55833	54.0972	F	28.9513	MZ	7.53333	FALSE	TRUE	predict2245	predict22452
62.3333	0.024231	-0.883829	-0.677381	2.47153	0.168056	24.634	7.66806	MCB	0.892129	1.13917	63.0582	F	24.8567	MZ	7.83333	FALSE	FALSE	predict2304	predict23041
48.5	-0.002428	0.527282	0.205952	2.6181	2.83472	31.8378	9.33472	High Carb	0.974482	0.2725	63.0582	F	24.8567	MZ	7.8	FALSE	FALSE	predict2304	predict23041
47.5	-0.045334	-0.944941	0.205952	3.56555	2.66806	35.5117	8.00139	High Carb	1.09111	0.356944	63.0582	F	24.8567	MZ	7.78333	FALSE	TRUE	predict2304	predict23041
37.75	-0.052171	-0.187996	-0.344048	2.00914	2.33472	31.1345	8.00139	OGTT	1.42654	0.886389	63.0582	F	24.8567	MZ	7.76667	FALSE	TRUE	predict2304	predict23041
56.5	0.043956	-1.12133	-0.677381	4.58404	3.16806	31.5965	9.00139	UK Average	1.03756	1.22389	63.0582	F	24.8567	MZ	7.7	FALSE	FALSE	predict2304	predict23041
60.75	0.025041	-2.86161	-0.594048	3.83038	0.834722	33.6939	9.33472	High Fibre	1.03135	1.0625	63.0582	F	24.8567	MZ	7.66667	FALSE	FALSE	predict2304	predict23041
44.5	-0.021703	0.834226	0.205952	2.296	0.668056	33.5802	7.66806	High Fat	0.605777	0.258333	63.0582	F	24.8567	MZ	7.65	FALSE	FALSE	predict2304	predict23041
46.5	0.014586	-3.03661	-3.44405	2.365	0.168056	27.3387	8.00139	High Protein	0.682103	3.98917	63.0582	F	24.8567	MZ	7.61667	FALSE	TRUE	predict2304	predict23041
67	-0.003135	0.346925	0.070238	1.92085	0.001389	33.6259	7.50139	High Carb	1.01169	0.338056	63.0582	F	24.9742	MZ	7.8	FALSE	FALSE	predict2304	predict23042
51	-0.002602	0.059425	0.303571	2.38241	3.50139	37.4911	8.16806	High Carb	1.12565	0.473889	63.0582	F	24.9742	MZ	7.78333	FALSE	TRUE	predict2304	predict23042
95	-0.030084	0.123314	0.153571	2.56584	2.50139	35.2395	8.50139	UK Average	0.730648	0.964444	63.0582	F	24.9742	MZ	7.76667	FALSE	TRUE	predict2304	predict23042
67	0.002472	-0.426686	-0.579762	1.33195	1.83472	29.5458	9.50139	OGTT	1.12852	1.485	63.0582	F	24.9742	MZ	7.73333	FALSE	FALSE	predict2304	predict23042
93	0.032596	-0.02252	-0.513095	1.41377	1.66806	31.9279	8.16806	OGTT	0.936064	1.33333	63.0582	F	24.9742	MZ	7.71667	FALSE	FALSE	predict2304	predict23042
95	0.015625	0.105258	-0.846429	2.00192	0.001389	31.7668	7.83472	UK Average	0.87549	0.685556	63.0582	F	24.9742	MZ	7.7	FALSE	FALSE	predict2304	predict23042
96	-0.006566	0.241369	-0.013095	1.60064	2.66806	36.9849	7.66806	High Fat	0.845466	1.00306	63.0582	F	24.9742	MZ	7.66667	FALSE	FALSE	predict2304	predict23042
93	-0.107146	-0.603075	-0.346429	3.09361	2.66806	53.2375	9.16806	High Fibre	1.18821	0.410833	63.0582	F	24.9742	MZ	7.65	FALSE	FALSE	predict2304	predict23042
63	0.003458	-0.664186	-0.579762	1.75918	2.33472	30.8378	9.83472	High Protein	0.804798	1.22389	63.0582	F	24.9742	MZ	7.61667	FALSE	TRUE	predict2304	predict23042
72.3333	0.040361	-0.550496	-0.80119	3.01082	0.334722	76.8485	6.00139	High Fat	0.569392	1.43083	56.8296	F	25.5625	MZ	7.26667	FALSE	FALSE	predict2354	predict23541
61	-0.031029	-0.499107	-0.767857	4.06179	0.001389	82.0965	7.83472	High Carb	0.779468	1.06111	56.8296	F	25.5625	MZ	7.28333	FALSE	FALSE	predict2354	predict23541
50.5	0.0151	-0.779662	-0.80119	6.69788	0.001389	70.3428	7.83472	High Carb	1.02533	1.43028	56.8296	F	25.5625	MZ	7.31667	FALSE	FALSE	predict2354	predict23541
45	0.05305	-0.992162	1.19881	4.28731	1.66806	40.6715	12.3347	OGTT	0.852422	0.435	56.8296	F	25.5625	MZ	7.35	FALSE	TRUE	predict2354	predict23541
57.25	0.0066	0.049504	-0.367857	5.5324	0.001389	45.3966	8.83472	UK Average	1.21238	0.185833	56.8296	F	25.5625	MZ	7.38333	FALSE	TRUE	predict2354	predict23541
51.75	-0.0113	1.07312	-0.434524	2.75628	0.001389	162.095	9.00139	OGTT	0.996568	0.613611	56.8296	F	25.5625	MZ	7.4	FALSE	FALSE	predict2354	predict23541
44.5	0.001954	-0.911607	-0.417857	3.97723	0.501389	30.5623	7.50139	UK Average	0.816627	0.971389	56.8296	F	25.5625	MZ	7.43333	FALSE	FALSE	predict2354	predict23541
57	-4.4e-05	-0.511607	-0.817857	2.02951	0.168056	48.9672	8.83472	High Fibre	0.925493	1.45111	56.8296	F	25.5625	MZ	7.46667	FALSE	FALSE	predict2354	predict23541
61.6667	-0.03098	0.938393	0.015476	2.67648	1.00139	70.3567	7.83472	High Protein	0.71083	0.810556	56.8296	F	25.5625	MZ	7.48333	FALSE	FALSE	predict2354	predict23541
64	-0.013243	-0.153274	-0.434524	2.60959	0.501389	73.4022	7.83472	High Protein	0.679428	0.968333	56.8296	F	25.5625	MZ	7.51667	FALSE	FALSE	predict2354	predict23541
70	0.058085	-0.324465	-0.475641	4.37035	0.001389	34.263	8.33472	High Fat	0.798459	2.32667	56.8296	F	30.0161	MZ	7.26667	FALSE	FALSE	predict2354	predict23542
66	0.022615	-1.01335	-1.12564	3.52473	0.001389	45.1357	6.33472	High Carb	1.19475	0.815278	56.8296	F	30.0161	MZ	7.28333	FALSE	FALSE	predict2354	predict23542
66.3333	-0.061029	1.61303	0.691026	2.37875	2.50139	42.2322	8.33472	High Carb	1.06529	0.415556	56.8296	F	30.0161	MZ	7.31667	FALSE	FALSE	predict2354	predict23542
42	-0.043791	0.361646	0.124359	2.17037	1.83472	42.8515	8.33472	OGTT	1.706	0.229444	56.8296	F	30.0161	MZ	7.35	FALSE	TRUE	predict2354	predict23542
65.5	0.003466	-0.350854	1.00769	2.94615	0.834722	33.7586	8.50139	UK Average	0.759056	0.433333	56.8296	F	30.0161	MZ	7.4	FALSE	FALSE	predict2354	predict23542
36.8	0.007308	-0.795299	-0.475641	3.55281	0.001389	29.0116	9.33472	OGTT	1.74031	0.368333	56.8296	F	30.0161	MZ	7.43333	FALSE	FALSE	predict2354	predict23542
69.3333	-0.069198	-0.307799	-0.775641	4.49877	0.001389	48.9685	7.83472	High Protein	0.719438	1.66833	56.8296	F	30.0161	MZ	7.48333	FALSE	FALSE	predict2354	predict23542
49	0.011917	-2.08558	0.807692	2.32091	0.834722	42.9258	8.66806	High Protein	0.916066	0.4875	56.8296	F	30.0161	MZ	7.51667	FALSE	FALSE	predict2354	predict23542
86	0.007741	1.95129	1.75714	2.65347	0.334722	27.6784	7.16806	MCB	0.76522	1.17889	45.8125	F	22.5323	MZ	5.7	TRUE	FALSE	predict2367	predict23671
82.3333	-0.021584	0.1249	0.62381	5.02483	1.66806	18.6883	8.50139	High Carb	1.0879	0.6275	45.8125	F	22.5323	MZ	5.66667	TRUE	TRUE	predict2367	predict23671
87.25	0.005804	1.16657	1.12381	3.91278	0.334722	26.2969	9.83472	High Carb	1.1091	1.72028	45.8125	F	22.5323	MZ	5.63333	TRUE	TRUE	predict2367	predict23671
57	0.037079	-1.10566	-1.34286	6.05729	0.334722	27.0627	6.83472	OGTT	1.11023	2.05528	45.8125	F	22.5323	MZ	5.56667	TRUE	FALSE	predict2367	predict23671
53.5	0.019437	-0.680655	-1.70952	3.40542	0.334722	61.539	10.0014	OGTT	1.08487	1.93389	45.8125	F	22.5323	MZ	5.55	TRUE	FALSE	predict2367	predict23671
73	-0.020361	-0.613988	-1.15952	4.59304	0.168056	20.8438	5.50139	UK Average	0.935529	1.98472	45.8125	F	22.5323	MZ	5.51667	TRUE	FALSE	predict2367	predict23671
50.5	-0.010099	-0.530655	-0.409524	5.5679	0.001389	33.2961	10.0014	High Protein	0.796214	1.13194	45.8125	F	22.5323	MZ	5.48333	TRUE	FALSE	predict2367	predict23671
74.5	-0.03789	-0.105655	1.00714	2.56764	2.66806	24.0195	13.8347	High Fibre	1.15691	1.51167	45.8125	F	22.5323	MZ	5.45	TRUE	TRUE	predict2367	predict23671
86.5	0.031204	-0.882044	1.10714	5.52208	1.50139	22.5908	7.33472	High Fat	0.621403	1.94472	45.8125	F	22.5323	MZ	5.41667	TRUE	TRUE	predict2367	predict23671
74.75	-0.005616	-2.37188	-2.65556	2.70995	1.16806	16.931	11.1681	High Fat	0.697891	4.92417	62.8939	F	51.9621	MZ	7.35	FALSE	TRUE	predict2387	predict23871
73.6667	0.007538	-0.969098	0.127778	2.80454	0.001389	18.3617	6.66806	High Carb	0.875721	2.03917	62.8939	F	51.9621	MZ	7.38333	FALSE	TRUE	predict2387	predict23871
67.75	0.016176	-2.75243	-1.35556	4.41348	0.001389	19.6313	8.16806	High Carb	1.01609	3.6725	62.8939	F	51.9621	MZ	7.4	FALSE	FALSE	predict2387	predict23871
62.3333	-0.001546	0.672569	0.494444	3.78142	0.001389	17.7523	5.33472	OGTT	1.04171	1.45861	62.8939	F	51.9621	MZ	7.43333	FALSE	FALSE	predict2387	predict23871
67	0.014193	-0.01632	-0.055556	2.39427	0.001389	24.8553	6.16806	UK Average	0.844933	2.85111	62.8939	F	51.9621	MZ	7.46667	FALSE	FALSE	predict2387	predict23871
68.5	-0.009916	0.592014	0.544444	3.43767	-5.49861	13.7579	7.66806	OGTT	0.957914	0.507778	62.8939	F	51.9621	MZ	7.51667	FALSE	FALSE	predict2387	predict23871
52	0.024301	1.11979	0.677778	3.6689	0.001389	14.1836	7.83472	High Fibre	0.982058	0.6675	62.8939	F	51.9621	MZ	7.53333	FALSE	TRUE	predict2387	predict23871
62	0.01096	0.68368	0.061111	2.1915	1.83472	17.5253	8.00139	High Protein	0.553473	1.06	62.8939	F	51.9621	MZ	7.6	FALSE	FALSE	predict2387	predict23871
74	-0.03184	-0.962897	-0.057143	5.89351	0.668056	48.4675	10.3347	MCB	0.764608	1.33611	52.3532	M	29.6551	MZ	6.23333	TRUE	FALSE	predict2433	predict24331
76.5	0.013008	0.41627	0.742857	3.68808	1.83472	46.266	7.66806	High Carb	1.28059	0.565278	52.3532	M	29.6551	MZ	6.2	TRUE	FALSE	predict2433	predict24331
81	0.017085	0.049603	-0.607143	1.54215	0.168056	51.7505	9.16806	High Carb	0.798097	1.93194	52.3532	M	29.6551	MZ	6.15	TRUE	TRUE	predict2433	predict24331
87.75	0.048756	-0.635119	-0.540476	4.1577	0.001389	44.2047	6.16806	UK Average	0.357511	2.66667	52.3532	M	29.6551	MZ	6.11667	TRUE	TRUE	predict2433	predict24331
49.5	0.006277	0.049603	0.292857	1.6278	2.00139	42.7766	8.66806	OGTT	1.39005	0.244444	52.3532	M	29.6551	MZ	6.05	TRUE	FALSE	predict2433	predict24331
88	-0.001174	-1.19623	-0.72381	2.73612	0.334722	37.8322	11.6681	UK Average	0.797474	2.20833	52.3532	M	29.6551	MZ	6.01667	TRUE	FALSE	predict2433	predict24331
86.5	-0.041101	0.920436	-0.907143	1.42904	0.668056	35.3413	6.50139	High Fat	0.6355	1.37083	52.3532	M	29.6551	MZ	5.98333	TRUE	FALSE	predict2433	predict24331
91	0.023981	-1.09623	-0.757143	2.69264	0.501389	38.1036	12.3347	High Fibre	0.919024	1.77389	52.3532	M	29.6551	MZ	5.95	TRUE	FALSE	predict2433	predict24331
79	0.008784	0.880158	0.542857	1.56339	0.001389	48.0824	6.33472	High Protein	0.671452	0.3225	52.3532	M	29.6551	MZ	5.9	TRUE	TRUE	predict2433	predict24331
43.25	-0.026531	-0.159226	0.144048	2.91812	1.83472	43.9707	8.33472	High Fat	0.664514	2.03917	26.9979	M	22.3237	MZ	6.56667	TRUE	FALSE	predict2434	predict24341
32	-0.004423	0.375496	-0.255952	1.61062	0.001389	50.2382	12.3347	MCB	0.886551	0.754444	26.9979	M	22.3237	MZ	6.53333	TRUE	FALSE	predict2434	predict24341
24.3333	0.036704	0.422719	-0.605952	3.05646	2.33472	44.2647	8.00139	High Carb	0.99132	2.49583	26.9979	M	22.3237	MZ	6.48333	TRUE	FALSE	predict2434	predict24341
67	0.011816	0.847719	-0.422619	1.78356	1.33472	36.568	7.83472	High Carb	1.01361	1.42667	26.9979	M	22.3237	MZ	6.45	TRUE	FALSE	predict2434	predict24341
58.5	-0.018962	1.9005	3.02738	2.49146	1.33472	36.2767	11.1681	UK Average	1.07505	0.16	26.9979	M	22.3237	MZ	6.38333	TRUE	TRUE	predict2434	predict24341
13	0.022981	-1.00784	-0.255952	2.48313	1.83472	43.5042	8.16806	OGTT	1.36954	2.13917	26.9979	M	22.3237	MZ	6.33333	TRUE	FALSE	predict2434	predict24341
50.5	0.035669	0.793552	-0.305952	3.566	1.33472	53.6482	8.16806	OGTT	0.878765	1.89167	26.9979	M	22.3237	MZ	6.3	TRUE	FALSE	predict2434	predict24341
40.5	0.03363	-1.29811	-0.405952	3.27726	1.16806	51.0471	8.16806	High Fibre	1.05397	0.340278	26.9979	M	22.3237	MZ	6.26667	TRUE	FALSE	predict2434	predict24341
23.5	-0.043984	-1.23561	-0.572619	1.05723	1.00139	56.911	8.16806	High Protein	0.849883	1.18889	26.9979	M	22.3237	MZ	6.23333	TRUE	FALSE	predict2434	predict24341
77	0.061638	1.09167	-0.169048	2.51777	1.00139	32.1949	11.0014	High Fat	0.442544	1.45833	64.5448	F	30.6337	MZ	7.5	TRUE	FALSE	predict256	predict2562
94.6667	-0.016877	-0.497223	1.09762	4.69189	2.83472	36.9769	10.3347	High Carb	1.17553	0.777778	64.5448	F	30.6337	MZ	7.53333	TRUE	TRUE	predict256	predict2562
100	-0.018273	-0.3125	2.36429	3.432	5.33472	29.2946	8.66806	OGTT	1.49927	0.473889	64.5448	F	30.6337	MZ	7.58333	TRUE	FALSE	predict256	predict2562
96	-0.061669	-1.74722	-0.052381	4.95658	0.668056	36.8021	13.8347	OGTT	0.888481	0.937778	64.5448	F	30.6337	MZ	7.61667	TRUE	FALSE	predict256	predict2562
73	-0.015954	-0.768056	-0.202381	6.45343	2.83472	39.6387	8.50139	UK Average	0.896942	0.261111	64.5448	F	30.6337	MZ	7.65	TRUE	FALSE	predict256	predict2562
80	0.034274	-2.25	0.547619	4.77451	3.33472	41.8024	9.83472	High Protein	0.879098	1.34028	64.5448	F	30.6337	MZ	7.73333	TRUE	TRUE	predict256	predict2562
47	-0.049477	0.558036	-0.10119	2.50754	4.66806	36.4646	10.5014	High Fat	1.03734	1.98028	57.4127	F	31.8012	DZ	6.2	TRUE	TRUE	predict257	predict2571
79	-0.013503	-0.033631	-0.317857	3.19125	0.001389	23.6214	9.00139	High Carb	0.996854	1.36944	57.4127	F	31.8012	DZ	6.25	TRUE	FALSE	predict257	predict2571
47	-0.001395	-4.05446	-3.40119	2.70153	0.001389	24.6545	11.6681	UK Average	1.00984	3.49306	57.4127	F	31.8012	DZ	6.28333	TRUE	FALSE	predict257	predict2571
71.6667	-0.003081	-0.090575	-0.417857	2.27427	0.001389	20.755	11.3347	OGTT	1.04441	1.22111	57.4127	F	31.8012	DZ	6.31667	TRUE	FALSE	predict257	predict2571
66	-0.026846	-0.939186	0.532143	1.84553	3.50139	20.1432	13.1681	UK Average	0.966859	0.2775	57.4127	F	31.8012	DZ	6.36667	TRUE	FALSE	predict257	predict2571
58	-0.040959	1.27897	1.22024	3.63654	1.33472	46.9324	7.66806	High Fat	0.588482	0.4625	56.0329	M	24.5675	DZ	6.56667	TRUE	TRUE	predict2583	predict25832
47	-0.020147	-0.197421	1.00357	2.92533	1.66806	39.7136	6.66806	High Carb	1.18409	0.839167	56.0329	M	24.5675	DZ	6.6	TRUE	TRUE	predict2583	predict25832
68	0.009882	-0.696032	0.386905	3.22863	1.00139	39.1343	12.5014	High Carb	0.966065	0.719444	56.0329	M	24.5675	DZ	6.63333	TRUE	FALSE	predict2583	predict25832
41	0.034345	-1.0252	-1.56309	4.85044	0.001389	77.2834	8.83472	OGTT	0.991496	1.04167	56.0329	M	24.5675	DZ	6.65	TRUE	FALSE	predict2583	predict25832
32	0.028928	-0.144643	0.453571	2.8549	1.00139	43.7421	5.66806	UK Average	0.814204	0.429167	56.0329	M	24.5675	DZ	6.68333	TRUE	FALSE	predict2583	predict25832
59	0.046299	0.228968	0.070238	4.57979	0.168056	45.5415	9.66806	UK Average	0.685072	1.03194	56.0329	M	24.5675	DZ	6.7	TRUE	FALSE	predict2583	predict25832
40	-0.043777	0.180357	0.436905	4.77968	0.001389	54.5305	7.00139	OGTT	0.839867	0.372222	56.0329	M	24.5675	DZ	6.73333	TRUE	FALSE	predict2583	predict25832
38	-0.076785	0.928968	-0.063095	4.25251	0.501389	37.1322	8.66806	High Fibre	1.06362	0.358333	56.0329	M	24.5675	DZ	6.78333	TRUE	TRUE	predict2583	predict25832
50	0.040133	0.352579	0.136905	2.47053	0.168056	26.7989	11.1681	High Protein	0.152034	0.833611	56.0329	M	24.5675	DZ	6.81667	TRUE	FALSE	predict2583	predict25832
45.3333	-0.009994	1.9249	0.385714	3.18736	0.001389	33.6805	7.66806	High Fat	0.883296	0.729167	52.2136	M	27.1703	MZ	6.68333	TRUE	FALSE	predict2635	predict26351
51.3333	0.054178	-1.27788	-0.980952	2.73488	0.501389	46.2718	7.50139	High Carb	1.34923	0.879167	52.2136	M	27.1703	MZ	6.7	TRUE	FALSE	predict2635	predict26351
43	-0.028407	-1.28343	-1.21429	4.23781	0.001389	47.4476	7.33472	High Carb	0.823218	1.1375	52.2136	M	27.1703	MZ	6.73333	TRUE	FALSE	predict2635	predict26351
53	-0.053204	-0.255655	-0.714286	4.79501	0.334722	54.0358	7.50139	OGTT	1.14561	1.61944	52.2136	M	27.1703	MZ	6.76667	TRUE	TRUE	predict2635	predict26351
44.3333	0.018425	-2.29316	-0.347619	3.47056	1.33472	42.6238	8.50139	OGTT	1.05909	3.40694	52.2136	M	27.1703	MZ	6.78333	TRUE	TRUE	predict2635	predict26351
48.5	0.060855	-1.66816	-1.23095	4.42365	0.001389	44.4335	9.66806	UK Average	0.788024	1.12111	52.2136	M	27.1703	MZ	6.81667	TRUE	FALSE	predict2635	predict26351
40.3333	-0.004194	-1.70843	-1.03095	2.7722	0.668056	65.9511	8.66806	UK Average	1.1433	0.459722	52.2136	M	27.1703	MZ	6.83333	TRUE	FALSE	predict2635	predict26351
46.6667	0.027254	-1.29038	-0.814286	4.48979	0.001389	55.8296	9.16806	High Protein	0.753862	1.11528	52.2136	M	27.1703	MZ	6.86667	TRUE	FALSE	predict2635	predict26351
42	-0.017061	2.84712	0.535714	0.830234	0.668056	60.1898	9.66806	High Protein	0.848515	0.191944	52.2136	M	27.1703	MZ	6.9	TRUE	FALSE	predict2635	predict26351
27.25	0.037626	-1.77649	0.452381	3.57408	1.50139	54.2946	8.16806	High Fibre	1.02658	1.28333	52.2136	M	27.1703	MZ	6.91667	TRUE	FALSE	predict2635	predict26351
74.75	-0.001531	-1.26776	-0.857143	2.34278	0.001389	81.5217	7.83472	High Fat	0.995352	0.393333	52.2136	M	23.7114	MZ	6.68333	TRUE	FALSE	predict2635	predict26352
75.3333	0.030598	-0.984425	-0.840476	2.94625	0.668056	84.2603	7.66806	High Carb	1.52993	0.366667	52.2136	M	23.7114	MZ	6.7	TRUE	FALSE	predict2635	predict26352
45	0.020156	-0.662202	-0.857143	3.89788	0.001389	85.2103	7.50139	High Carb	1.38171	0.198611	52.2136	M	23.7114	MZ	6.73333	TRUE	FALSE	predict2635	predict26352
50.6667	-0.029505	0.479464	1.67619	2.81513	2.00139	44.5573	10.1681	OGTT	1.88003	-1.89417	52.2136	M	23.7114	MZ	6.78333	TRUE	TRUE	predict2635	predict26352
49	0.054205	-1.30387	-0.82381	3.43922	0.001389	54.8338	10.0014	UK Average	1.14698	0.237778	52.2136	M	23.7114	MZ	6.81667	TRUE	FALSE	predict2635	predict26352
68.3333	-0.041873	0.180853	-0.82381	2.39257	0.501389	68.9797	6.66806	UK Average	0.799222	0.237778	52.2136	M	23.7114	MZ	6.83333	TRUE	FALSE	predict2635	predict26352
75.3333	-0.032038	-0.276091	-1.14048	5.89624	1.66806	83.978	7.33472	High Fibre	0.978412	0.544722	52.2136	M	23.7114	MZ	6.86667	TRUE	FALSE	predict2635	predict26352
74	0.015576	-1.10804	-0.82381	1.97278	0.168056	71.9727	7.00139	High Protein	1.13564	0.255833	52.2136	M	23.7114	MZ	6.9	TRUE	FALSE	predict2635	predict26352
82.3333	-0.035688	0.282242	0.47619	2.17922	0.668056	57.3437	6.66806	High Protein	1.01049	-1.115	52.2136	M	23.7114	MZ	6.91667	TRUE	FALSE	predict2635	predict26352
69.75	0.01851	0.844544	0.75	2.13625	1.33472	31.0357	9.16806	High Fat	0.82315	0.801667	50.0643	F	26.406	DZ	7.73333	TRUE	TRUE	predict2690	predict26901
69.75	-0.025699	-0.709623	-1.01667	5.9082	0.001389	27.4391	7.66806	UK Average	0.691738	0.793333	50.0643	F	26.406	DZ	6.81667	FALSE	FALSE	predict2690	predict26901
75.25	0.001101	-1.69851	-0.933333	1.9722	1.50139	27.4663	7.33472	OGTT	0.912278	1.55306	50.0643	F	26.406	DZ	6.85	FALSE	FALSE	predict2690	predict26901
56.5	0.0114	-1.1749	-1.15	0.885808	1.00139	28.5167	9.16806	UK Average	0.805509	0.762778	50.0643	F	26.406	DZ	6.88333	FALSE	FALSE	predict2690	predict26901
57	-0.06184	-0.956845	-1.01667	3.9612	0.168056	23.3567	8.66806	OGTT	0.792363	1.49056	50.0643	F	26.406	DZ	6.91667	FALSE	FALSE	predict2690	predict26901
63.25	0.020316	0.840377	0.883333	6.9564	3.16806	23.3113	6.33472	High Protein	0.73939	0.4	50.0643	F	26.406	DZ	6.95	FALSE	TRUE	predict2690	predict26901
63.25	-0.012676	0.812599	0.733333	3.28782	2.83472	41.8399	8.33472	High Fibre	1.0909	0.363889	50.0643	F	26.406	DZ	6.96667	FALSE	TRUE	predict2690	predict26901
66.75	-0.007954	-1.61379	-0.916667	4.74101	1.00139	49.7766	9.16806	High Protein	0.629036	0.520833	50.0643	F	26.406	DZ	7	FALSE	FALSE	predict2690	predict26901
56.6667	0.013701	1.35556	1.49286	4.74915	1.66806	47.1075	9.00139	High Fat	0.712788	0.323611	56.627	F	23.9459	MZ	7.95	FALSE	FALSE	predict2691	predict26911
52	-0.048064	-0.475	-0.790476	4.09553	2.16806	29.4546	9.66806	High Carb	1.27098	2.3875	56.627	F	23.9459	MZ	7.91667	FALSE	TRUE	predict2691	predict26911
55.5	0.049614	-2.425	-1.69048	4.67136	0.001389	38.6769	8.83472	High Carb	0.796812	3.53333	56.627	F	23.9459	MZ	7.9	FALSE	TRUE	predict2691	predict26911
46.3333	0.020374	-0.680555	-0.907143	3.60979	1.66806	35.2898	11.8347	OGTT	0.776382	2.39167	56.627	F	23.9459	MZ	7.88333	FALSE	FALSE	predict2691	predict26911
49.25	0.03443	0.636111	0.692857	4.69538	0.501389	48.1278	8.66806	UK Average	0.788486	0.791667	56.627	F	23.9459	MZ	7.86667	FALSE	FALSE	predict2691	predict26911
47.25	0.033155	1.04306	0.97619	4.18278	1.50139	43.3851	13.1681	UK Average	0.928212	0.466944	56.627	F	23.9459	MZ	7.85	FALSE	FALSE	predict2691	predict26911
48.3333	-0.01079	-0.445833	0.359524	4.00185	1.33472	31.0712	8.16806	OGTT	1.01334	1.10722	56.627	F	23.9459	MZ	7.83333	FALSE	FALSE	predict2691	predict26911
45	0.007526	0.366667	0.72619	4.39539	2.00139	27.5335	8.00139	High Protein	0.552761	0.756944	56.627	F	23.9459	MZ	7.8	FALSE	FALSE	predict2691	predict26911
40.5	0.012786	-0.294444	0.02619	4.33346	2.83472	23.6222	8.50139	High Fibre	1.01931	1.48083	56.627	F	23.9459	MZ	7.78333	FALSE	TRUE	predict2691	predict26911
24	-0.04521	1.07778	0.709524	3.98115	2.50139	29.2141	9.00139	High Fat	0.698728	0.754167	56.627	F	23.9459	MZ	7.76667	FALSE	TRUE	predict2691	predict26911
74.3333	-0.046034	-0.267857	1.26905	3.17281	0.834722	46.1195	8.16806	High Carb	0.786707	0.239167	56.627	F	24.1875	MZ	7.91667	FALSE	TRUE	predict2691	predict26912
72	0.012539	1.50575	1.25238	3.41997	1.83472	43.9455	7.66806	High Carb	0.920758	0.219444	56.627	F	24.1875	MZ	7.9	FALSE	TRUE	predict2691	predict26912
64.25	-0.015924	1.3002	1.63571	2.12839	0.501389	41.3515	8.50139	UK Average	0.871063	0.0194444	56.627	F	24.1875	MZ	7.88333	FALSE	FALSE	predict2691	predict26912
62.25	0.027513	-1.92758	-1.93095	2.44301	0.834722	38.455	8.16806	OGTT	0.951778	3.40694	56.627	F	24.1875	MZ	7.86667	FALSE	FALSE	predict2691	predict26912
65.75	0.061718	-3.65119	-3.81429	4.4745	0.001389	44.1278	8.83472	OGTT	0.880833	5.2875	56.627	F	24.1875	MZ	7.85	FALSE	FALSE	predict2691	predict26912
55.75	0.059363	-0.162302	-0.064286	1.73996	0.001389	41.5269	9.83472	UK Average	0.975885	1.54056	56.627	F	24.1875	MZ	7.83333	FALSE	FALSE	predict2691	predict26912
71.25	0.013433	-0.234524	-0.247619	3.19894	0.501389	42.3851	11.6681	High Fat	0.84633	1.73083	56.627	F	24.1875	MZ	7.8	FALSE	FALSE	predict2691	predict26912
50	0.024041	-0.497024	-1.41429	1.64513	0.001389	47.4343	9.16806	High Protein	0.744512	2.9625	56.627	F	24.1875	MZ	7.78333	FALSE	TRUE	predict2691	predict26912
62.25	-0.015536	1.68075	1.33571	2.72796	0.668056	38.7675	13.1681	High Fibre	1.05477	0.169444	56.627	F	24.1875	MZ	7.76667	FALSE	TRUE	predict2691	predict26912
39	-0.102794	-1.35744	-0.272619	3.43803	1.16806	20.295	9.33472	High Fat	1.4228	-1.32528	63.269	F	35.8116	DZ	7.11667	FALSE	FALSE	predict2694	predict26941
50.6667	0.028915	0.705059	1.32738	2.83705	3.50139	14.2508	10.6681	High Carb	1.71135	0.621944	63.269	F	35.8116	DZ	7.15	FALSE	TRUE	predict2694	predict26941
48.75	0.012069	0.757837	2.67738	5.70597	2.33472	34.0634	11.0014	High Carb	1.93127	0.23	63.269	F	35.8116	DZ	7.18333	FALSE	TRUE	predict2694	predict26941
46	0.026468	-0.215774	0.410714	3.41007	2.50139	28.3175	9.50139	UK Average	1.57163	0.312222	63.269	F	35.8116	DZ	7.2	FALSE	FALSE	predict2694	predict26941
30	-0.064721	1.66061	1.71071	2.32027	2.16806	16.7753	8.50139	OGTT	1.54581	-2.34556	63.269	F	35.8116	DZ	7.23333	FALSE	FALSE	predict2694	predict26941
52.6667	-0.009644	0.738392	-0.022619	3.80753	0.334722	17.6283	9.66806	UK Average	1.48581	0.179722	63.269	F	35.8116	DZ	7.26667	FALSE	FALSE	predict2694	predict26941
58.5	0.007017	-2.73522	-5.08929	6.53787	1.00139	18.4505	8.00139	OGTT	1.95566	1.64639	63.269	F	35.8116	DZ	7.28333	FALSE	FALSE	predict2694	predict26941
65.5	0.041577	-3.32133	-2.40595	8.36307	-6.33194	37.4312	13.1681	High Protein	1.4893	0.650556	63.269	F	35.8116	DZ	7.31667	FALSE	FALSE	predict2694	predict26941
68	0.008002	-0.355556	0.621429	4.68533	0.334722	26.8236	7.50139	High Fat	0.520867	1.2325	63.269	F	33.1778	DZ	7.11667	FALSE	FALSE	predict2694	predict26942
69	-0.019647	2.14722	1.0881	2.22059	0.001389	31.6773	7.33472	High Carb	0.82569	0.753056	63.269	F	33.1778	DZ	7.15	FALSE	TRUE	predict2694	predict26942
34.5	0.069011	-1.92083	0.504762	3.13029	1.83472	38.0275	10.0014	High Carb	1.0512	0.408333	63.269	F	33.1778	DZ	7.18333	FALSE	TRUE	predict2694	predict26942
60	-0.037299	3.32917	1.67143	2.8973	1.66806	40.9917	8.00139	UK Average	1.26609	0.180833	63.269	F	33.1778	DZ	7.2	FALSE	FALSE	predict2694	predict26942
72	-0.046133	-0.925	1.03809	4.76094	2.83472	29.151	8.50139	UK Average	1.08791	1.12944	63.269	F	33.1778	DZ	7.23333	FALSE	FALSE	predict2694	predict26942
57	0.05602	1.06389	0.521429	2.30628	1.83472	27.7931	8.00139	OGTT	1.14473	1.03889	63.269	F	33.1778	DZ	7.26667	FALSE	FALSE	predict2694	predict26942
41	-0.001263	-0.693056	-0.245238	2.20282	0.334722	25.0752	10.6681	OGTT	1.16585	0.626944	63.269	F	33.1778	DZ	7.28333	FALSE	FALSE	predict2694	predict26942
52.5	-0.076615	-1.12917	-1.82857	5.05281	0.168056	29.6752	7.00139	High Protein	0.619752	1.66278	63.269	F	33.1778	DZ	7.31667	FALSE	FALSE	predict2694	predict26942
65.5	0.077673	-1.29445	-0.161905	1.89681	2.33472	25.4359	5.16806	High Protein	0.747792	1.50694	63.269	F	33.1778	DZ	7.35	FALSE	TRUE	predict2694	predict26942
88.5	0.029525	0.305258	0.953571	3.85987	3.83472	62.8348	8.00139	High Fat	0.572663	1.89389	50.3272	F	28.1822	MZ	7.68333	FALSE	FALSE	predict277	predict2771
66.5	0.066043	1.9872	1.77024	6.49406	0.834722	16.662	8.83472	High Fat	0.785281	0.51	50.3272	F	28.1822	MZ	7.71667	FALSE	TRUE	predict277	predict2771
55.3333	-0.050194	-1.13363	0.536905	5.78175	1.33472	42.0404	7.66806	High Carb	1.2218	0.266111	50.3272	F	28.1822	MZ	7.73333	FALSE	TRUE	predict277	predict2771
68	0.014689	1.39137	-0.296429	3.4744	0.001389	89.1454	8.83472	UK Average	1.02543	2.94528	50.3272	F	28.1822	MZ	7.76667	FALSE	FALSE	predict277	predict2771
63.6667	0.049731	-0.457242	-1.5131	4.84415	2.33472	45.8437	11.0014	OGTT	1.03745	2.05389	50.3272	F	28.1822	MZ	7.78333	FALSE	FALSE	predict277	predict2771
80	0.006	1.99137	0.420238	5.41476	3.00139	15.5329	8.16806	UK Average	1.15272	1.245	50.3272	F	28.1822	MZ	7.8	FALSE	FALSE	predict277	predict2771
62.5	-0.040443	0.370536	0.420238	5.11138	1.66806	22.3248	11.5014	OGTT	1.02593	0.919444	50.3272	F	28.1822	MZ	7.81667	FALSE	FALSE	predict277	predict2771
57.5	0.027306	0.530258	-0.096429	5.35927	0.001389	36.1924	9.83472	High Protein	0.917301	1.62861	50.3272	F	28.1822	MZ	7.86667	FALSE	TRUE	predict277	predict2771
28	-0.044835	-2.41141	-2.92976	4.58419	2.83472	36.4478	10.8347	High Fat	1.12492	6.59778	50.3272	F	28.1822	MZ	7.88333	FALSE	TRUE	predict277	predict2771
53	0.065417	-0.280853	0.170238	2.50542	2.66806	48.1243	10.6681	High Carb	1.25298	1.09472	50.3272	F	28.1822	MZ	7.9	FALSE	FALSE	predict277	predict2771
43.5	-0.062255	0.259424	0.336905	5.70694	0.168056	26.5142	11.8347	High Fibre	0.960416	0.711944	50.3272	F	28.1822	MZ	7.91667	FALSE	FALSE	predict277	predict2771
67.75	0.086693	0.08254	0.544048	2.0616	0.334722	51.6221	8.50139	High Fat	0.487058	1.32667	50.3272	F	21.9524	MZ	7.68333	FALSE	FALSE	predict277	predict2772
65.75	0.040346	0.468651	-0.489286	2.73337	1.33472	49.7617	11.3347	High Carb	1.07275	6.10278	50.3272	F	21.9524	MZ	7.73333	FALSE	TRUE	predict277	predict2772
76.3333	-0.029502	0.997818	1.07738	3.87543	0.001389	32.1103	6.83472	High Carb	0.93215	1.55778	50.3272	F	21.9524	MZ	7.76667	FALSE	FALSE	predict277	predict2772
72.25	-0.061126	-2.82441	-1.60595	4.63829	2.00139	57.4657	10.1681	OGTT	1.2869	0.477778	50.3272	F	21.9524	MZ	7.78333	FALSE	FALSE	predict277	predict2772
80.3333	-0.006886	0.935318	0.494048	4.59777	0.168056	45.0032	8.33472	OGTT	0.918207	3.77722	50.3272	F	21.9524	MZ	7.85	FALSE	FALSE	predict277	predict2772
49.3333	0.066358	0.00248	0.465476	2.17786	1.00139	24.9988	10.1681	High Fat	0.838092	0.331389	62.872	F	26.6367	DZ	7.45	TRUE	FALSE	predict289	predict2891
44.75	0.039547	-0.325298	-0.017857	3.20265	1.00139	27.8739	8.66806	High Carb	0.966053	1.71194	62.872	F	26.6367	DZ	7.5	TRUE	FALSE	predict289	predict2891
44	0.044996	-4.56835	-5.40119	2.91712	0.001389	37.3902	8.83472	UK Average	0.761715	5.98278	62.872	F	26.6367	DZ	7.53333	TRUE	TRUE	predict289	predict2891
34.5	0.025448	0.123313	-0.234524	4.18031	0.501389	27.6073	10.1681	OGTT	1.23869	0.316111	62.872	F	26.6367	DZ	7.61667	TRUE	FALSE	predict289	predict2891
48.25	0.055434	0.181647	0.94881	3.2841	3.33472	21.3601	9.66806	High Protein	0.891317	1.08667	62.872	F	26.6367	DZ	7.65	TRUE	FALSE	predict289	predict2891
42	-0.06392	0.073313	0.432143	3.03095	1.33472	37.8733	9.83472	High Fibre	0.796474	1.2475	62.872	F	26.6367	DZ	7.7	TRUE	FALSE	predict289	predict2891
56.3333	0.00829	0.074703	0.205952	2.10762	2.16806	29.3417	8.00139	High Fat	0.942894	0.928611	62.872	F	26.5039	DZ	7.45	TRUE	FALSE	predict289	predict2892
44.5	0.019142	0.445536	0.489286	3.21027	1.00139	45.6801	8.00139	High Carb	1.0397	0.608611	62.872	F	26.5039	DZ	7.48333	TRUE	FALSE	predict289	predict2892
53	0.005828	-0.887797	-0.977381	2.84656	1.00139	33.9903	8.00139	High Carb	1.1581	2.11361	62.872	F	26.5039	DZ	7.5	TRUE	FALSE	predict289	predict2892
53.25	-0.022767	-0.343353	0.205952	3.43182	2.50139	33.9692	8.16806	OGTT	1.2849	0.819722	62.872	F	26.5039	DZ	7.53333	TRUE	TRUE	predict289	predict2892
52	-0.00545	0.080258	1.32262	3.97676	2.16806	34.6594	8.16806	UK Average	0.950976	0.660833	62.872	F	26.5039	DZ	7.56667	TRUE	TRUE	predict289	predict2892
54.5	-0.05486	0.162203	0.772619	2.50584	1.50139	49.5412	10.1681	UK Average	1.08826	0.524722	62.872	F	26.5039	DZ	7.58333	TRUE	FALSE	predict289	predict2892
41	0.022486	-1.30585	-1.12738	4.37821	1.00139	45.6055	10.3347	OGTT	1.06842	0.320556	62.872	F	26.5039	DZ	7.61667	TRUE	FALSE	predict289	predict2892
54.75	0.03752	-1.13641	-1.24405	3.8708	0.668056	31.1989	7.16806	High Protein	0.510982	2.76333	62.872	F	26.5039	DZ	7.65	TRUE	FALSE	predict289	predict2892
59.5	-0.067212	-0.57113	-0.994048	3.46718	1.33472	47.687	7.50139	High Fibre	0.912379	2.25278	62.872	F	26.5039	DZ	7.68333	TRUE	FALSE	predict289	predict2892
51	0.03927	-0.498908	-0.960714	5.1709	1.33472	31.335	7.16806	High Protein	0.486544	2.265	62.872	F	26.5039	DZ	7.7	TRUE	FALSE	predict289	predict2892
71	-0.010053	0.838294	1.075	3.03601	3.16806	43.3838	8.83472	High Fat	0.661107	0.920833	48.2491	F	26.3821	DZ	6.23333	TRUE	TRUE	predict297	predict2972
60.6667	0.00633	-0.197817	0.125	4.62082	1.83472	48.0396	11.3347	High Carb	1.13535	0.531944	48.2491	F	26.3821	DZ	6.25	TRUE	FALSE	predict297	predict2972
62	-0.007069	-0.374206	-0.925	3.48393	0.001389	60.1731	9.66806	High Carb	1.04732	0.270833	48.2491	F	26.3821	DZ	6.28333	TRUE	FALSE	predict297	predict2972
59	-0.036519	-0.829762	-0.341667	3.68834	1.16806	53.3302	7.16806	OGTT	1.02949	0.630833	48.2491	F	26.3821	DZ	6.31667	TRUE	FALSE	predict297	predict2972
59	-0.007432	-0.564484	-0.391667	2.62866	0.668056	46.344	7.33472	OGTT	1.20683	0.539167	48.2491	F	26.3821	DZ	6.33333	TRUE	FALSE	predict297	predict2972
59.25	0.004627	-0.336706	-0.391667	3.27527	0.001389	54.7921	8.66806	UK Average	0.693088	0.643056	48.2491	F	26.3821	DZ	6.36667	TRUE	FALSE	predict297	predict2972
50.6667	0.013896	-0.693651	-0.291667	4.38393	2.00139	46.8602	7.83472	UK Average	0.512209	1.15833	48.2491	F	26.3821	DZ	6.38333	TRUE	TRUE	predict297	predict2972
47.75	-0.006363	-1.26032	-1.14167	3.03962	0.001389	57.0712	10.5014	High Protein	0.512155	0.5225	48.2491	F	26.3821	DZ	6.41667	TRUE	TRUE	predict297	predict2972
54.5	0.007982	-0.27004	-0.058333	2.35879	1.83472	41.4451	6.16806	High Fibre	0.552891	0.648611	48.2491	F	26.3821	DZ	6.45	TRUE	FALSE	predict297	predict2972
62.5	0.002438	0.807738	0.375	3.87763	0.001389	58.6839	8.16806	High Protein	0.590389	-0.2875	48.2491	F	26.3821	DZ	6.46667	TRUE	FALSE	predict297	predict2972
48	0.018509	0.265675	0.315476	1.8429	0.001389	27.5029	13.5014	High Fat	0.589703	0.351667	62.9049	F	25.3484	MZ	7.35	FALSE	TRUE	predict3021	predict30211
74.5	0.032003	-0.998214	-0.534524	2.27712	1.33472	49.5996	8.00139	High Carb	1.24305	2.51972	62.9049	F	25.3484	MZ	7.38333	FALSE	TRUE	predict3021	predict30211
61.3333	-0.005348	-0.671825	-0.70119	2.66251	0.001389	56.469	9.66806	High Carb	0.949361	1.49333	62.9049	F	25.3484	MZ	7.4	FALSE	FALSE	predict3021	predict30211
52.5	0.024892	-1.63988	-2.00119	3.35937	0.501389	42.2043	10.6681	OGTT	0.979461	2.03611	62.9049	F	25.3484	MZ	7.43333	FALSE	FALSE	predict3021	predict30211
43.5	0.00259	-0.244047	0.315476	1.49778	1.33472	54.0116	12.1681	OGTT	0.63811	0.832222	62.9049	F	25.3484	MZ	7.46667	FALSE	FALSE	predict3021	predict30211
62.5	-0.053322	0.147619	-0.05119	1.18085	1.50139	54.5313	9.66806	UK Average	0.630633	0.440278	62.9049	F	25.3484	MZ	7.48333	FALSE	FALSE	predict3021	predict30211
64.5	0.038637	-1.78571	-0.25119	2.27196	2.16806	46.3519	13.6681	UK Average	0.862859	2.01278	62.9049	F	25.3484	MZ	7.51667	FALSE	FALSE	predict3021	predict30211
69	0.031622	1.53095	-0.284524	1.60241	0.001389	44.701	9.66806	High Fibre	0.645434	2.38639	62.9049	F	25.3484	MZ	7.53333	FALSE	TRUE	predict3021	predict30211
70.6667	-0.036372	-0.31627	-0.167857	3.75673	0.001389	45.9752	7.50139	High Protein	0.620248	2.49333	62.9049	F	25.3484	MZ	7.56667	FALSE	TRUE	predict3021	predict30211
69	0.041541	-0.69127	-0.00119	2.55548	0.168056	41.3859	8.16806	High Protein	0.341769	0.858333	62.9049	F	25.3484	MZ	7.6	FALSE	FALSE	predict3021	predict30211
69	-0.006056	-0.212103	0.089286	1.86668	0.668056	54.9669	10.3347	High Fat	0.46622	0.960556	62.9049	F	26.1668	MZ	7.31667	FALSE	FALSE	predict3021	predict30212
72	0.009956	-1.94683	-1.54405	3.29562	1.83472	32.3885	11.0014	High Fat	0.749156	0.746944	62.9049	F	26.1668	MZ	7.35	FALSE	TRUE	predict3021	predict30212
50.5	0.043558	-1.75516	-1.56071	5.72389	1.66806	39.2525	7.33472	High Carb	1.10457	0.2575	62.9049	F	26.1668	MZ	7.4	FALSE	FALSE	predict3021	predict30212
57.6667	0.025326	-0.749603	-0.560714	4.07851	2.00139	29.3317	7.83472	OGTT	1.28782	0.269167	62.9049	F	26.1668	MZ	7.43333	FALSE	FALSE	predict3021	predict30212
62.75	0.024864	0.562897	0.405952	1.70488	2.50139	46.5104	8.66806	OGTT	0.870847	0.441667	62.9049	F	26.1668	MZ	7.46667	FALSE	FALSE	predict3021	predict30212
58	-0.019744	-0.45377	-0.677381	3.17212	1.66806	42.7892	8.00139	UK Average	0.871329	0.279444	62.9049	F	26.1668	MZ	7.48333	FALSE	FALSE	predict3021	predict30212
67.5	-0.046355	1.77818	1.53929	2.68602	3.50139	40.6082	9.83472	UK Average	1.01106	0.214444	62.9049	F	26.1668	MZ	7.51667	FALSE	FALSE	predict3021	predict30212
38	-0.012276	0.487897	0.272619	2.54112	0.501389	27.028	8.50139	High Fibre	1.02993	0.36	62.9049	F	26.1668	MZ	7.53333	FALSE	TRUE	predict3021	predict30212
54	0.019289	-0.700992	-0.577381	3.12657	0.168056	51.5353	7.66806	High Protein	0.740308	0.184722	62.9049	F	26.1668	MZ	7.6	FALSE	FALSE	predict3021	predict30212
57.2	-0.034387	1.45585	-0.529762	3.91618	0.668056	44.6749	7.16806	MCB	0.398427	0.787222	42.5873	F	27.3524	MZ	6.58333	FALSE	FALSE	predict303	predict3031
45.75	0.033557	-1.27748	-0.913095	5.83743	0.168056	39.136	7.00139	High Carb	0.478637	0.858056	42.5873	F	27.3524	MZ	6.55	FALSE	FALSE	predict303	predict3031
58.3333	-0.041233	-0.862202	0.186905	4.69291	2.33472	28.9608	13.0014	High Carb	0.540409	0.276944	42.5873	F	27.3524	MZ	6.5	FALSE	FALSE	predict303	predict3031
49.3333	-0.00136	-0.16498	0.886905	5.03496	3.16806	30.9487	7.83472	UK Average	0.748015	0.474167	42.5873	F	27.3524	MZ	6.46667	FALSE	TRUE	predict303	predict3031
44.75	0.016866	0.016965	0.536905	5.33052	0.834722	32.0689	9.00139	OGTT	1.15891	0.235	42.5873	F	27.3524	MZ	6.43333	FALSE	TRUE	predict303	predict3031
61.5	-0.022264	0.482242	0.253571	6.05211	1.66806	32.548	9.66806	UK Average	0.50118	0.265833	42.5873	F	27.3524	MZ	6.4	FALSE	FALSE	predict303	predict3031
56	0.055909	0.387798	-0.263095	6.74498	2.50139	38.1324	7.50139	OGTT	0.86251	0.731111	42.5873	F	27.3524	MZ	6.35	FALSE	FALSE	predict303	predict3031
51.75	0.029685	-0.221924	0.086905	9.07324	0.001389	41.8219	7.50139	High Protein	0.469714	0.284444	42.5873	F	27.3524	MZ	6.31667	FALSE	FALSE	predict303	predict3031
49	0.011614	0.325298	-0.096429	7.81387	2.33472	43.9388	7.33472	High Fibre	0.441158	0.630556	42.5873	F	27.3524	MZ	6.28333	FALSE	FALSE	predict303	predict3031
61.6667	-0.072847	0.564187	0.320238	8.95559	0.668056	37.0529	7.50139	High Fat	0.420967	0.204722	42.5873	F	27.3524	MZ	6.25	FALSE	FALSE	predict303	predict3031
31.5	0.027961	1.8656	1.56282	3.44531	0.001389	31.5971	6.33472	MCB	0.785985	0.504444	59.0445	F	26.2013	DZ	7.91667	FALSE	TRUE	predict3088	predict30882
25.4	0.035586	-2.26079	0.929487	2.20199	2.83472	27.2278	10.1681	High Carb	1.06323	0.726667	59.0445	F	26.2013	DZ	7.9	FALSE	TRUE	predict3088	predict30882
27	-0.085405	-0.602457	-1.18718	5.86837	0.001389	24.5529	8.16806	High Carb	1.03319	1.87111	59.0445	F	26.2013	DZ	7.88333	FALSE	FALSE	predict3088	predict30882
36	0.012288	-0.938569	-1.18718	3.47087	0.001389	37.2514	5.83472	UK Average	0.865192	1.91972	59.0445	F	26.2013	DZ	7.86667	FALSE	FALSE	predict3088	predict30882
13.5	0.002013	-0.36218	0.096154	4.53084	0.501389	35.7919	6.50139	OGTT	1.32427	1.22806	59.0445	F	26.2013	DZ	7.85	FALSE	FALSE	predict3088	predict30882
18.5	0.016585	0.768376	0.396154	4.24653	0.001389	35.6153	10.0014	OGTT	1.2581	0.114167	59.0445	F	26.2013	DZ	7.83333	FALSE	FALSE	predict3088	predict30882
40.5	0.018177	1.72254	1.32949	1.82965	2.50139	46.4031	9.50139	UK Average	0.718046	0.289167	59.0445	F	26.2013	DZ	7.8	FALSE	FALSE	predict3088	predict30882
30	-0.00236	-0.060791	1.37949	3.41109	1.33472	40.2493	9.16806	High Fat	0.833367	0.229167	59.0445	F	26.2013	DZ	7.78333	FALSE	TRUE	predict3088	predict30882
36	-0.00848	0.294765	0.929487	5.09572	0.501389	44.9507	8.33472	High Protein	0.82439	0.6375	59.0445	F	26.2013	DZ	7.76667	FALSE	TRUE	predict3088	predict30882
44	0.044002	-1.75107	-2.32051	3.40416	0.001389	40.1122	8.16806	High Fibre	0.917994	3.36	59.0445	F	26.2013	DZ	7.73333	FALSE	FALSE	predict3088	predict30882
49	-0.023364	-0.758433	-0.632143	2.80949	1.50139	30.6038	8.00139	High Carb	0.748075	1.64111	49.8946	F	19.4553	DZ	7.8	FALSE	FALSE	predict3209	predict32091
25.3333	0.006057	1.04018	0.684524	3.51912	0.001389	48.2185	6.66806	High Carb	0.502382	0.325556	49.8946	F	19.4553	DZ	7.78333	FALSE	TRUE	predict3209	predict32091
9.5	0.022266	0.104067	1.98452	4.58403	4.16806	36.8257	10.0014	OGTT	0.712956	-2.28194	49.8946	F	19.4553	DZ	7.76667	FALSE	TRUE	predict3209	predict32091
44	-0.035412	0.567956	0.55119	4.12946	1.66806	37.4823	9.16806	UK Average	0.744118	0.476111	49.8946	F	19.4553	DZ	7.73333	FALSE	FALSE	predict3209	predict32091
71.3333	0.011964	-0.758433	-1.54881	4.06841	0.501389	50.8068	10.0014	UK Average	0.863192	2.54889	49.8946	F	19.4553	DZ	7.71667	FALSE	FALSE	predict3209	predict32091
24	0.041656	-0.409821	-0.59881	4.53852	1.16806	33.5274	7.66806	OGTT	1.13748	0.626667	49.8946	F	19.4553	DZ	7.7	FALSE	FALSE	predict3209	predict32091
88	-0.056042	-0.22371	-0.665476	2.71274	0.001389	39.043	9.33472	High Protein	0.554856	1.66389	49.8946	F	19.4553	DZ	7.66667	FALSE	FALSE	predict3209	predict32091
65	0.059029	0.279067	0.784524	3.5482	0.001389	32.5365	7.33472	High Fat	0.428425	0.635833	49.8946	F	19.4553	DZ	7.61667	FALSE	TRUE	predict3209	predict32091
99	0.007415	-1.37649	-0.475	1.72636	1.16806	35.4773	7.83472	High Fat	0.61276	1.56222	62.8172	F	19.1953	MZ	7.65	FALSE	FALSE	predict3214	predict32141
98.3333	0.004422	-0.995933	-0.608333	2.48415	0.168056	33.1413	10.6681	High Carb	0.995553	2.02833	62.8172	F	19.1953	MZ	7.66667	FALSE	FALSE	predict3214	predict32141
95	0.00592	0.061012	0.891667	1.3138	0.668056	56.2162	7.66806	High Carb	0.81432	1.95917	62.8172	F	19.1953	MZ	7.68333	FALSE	FALSE	predict3214	predict32141
97	-0.074433	0.829067	-1.45833	3.25864	0.168056	40.4132	8.66806	OGTT	1.33251	0.380556	62.8172	F	19.1953	MZ	7.71667	FALSE	TRUE	predict3214	predict32141
98.3333	0.00332	1.12907	0.241667	2.18269	0.334722	37.0273	9.50139	OGTT	0.869392	0.3275	62.8172	F	19.1953	MZ	7.73333	FALSE	TRUE	predict3214	predict32141
96.6667	-0.111835	1.44434	0.308333	1.35992	0.001389	40.9677	8.66806	UK Average	0.783412	2.11222	62.8172	F	19.1953	MZ	7.76667	FALSE	FALSE	predict3214	predict32141
93	0.030302	-1.50704	-1.25833	2.84214	2.16806	38.3589	9.66806	UK Average	0.872635	3.60833	62.8172	F	19.1953	MZ	7.78333	FALSE	FALSE	predict3214	predict32141
97	-0.01068	-1.81121	-0.941667	1.88332	1.66806	34.8536	7.83472	High Fibre	0.664532	2.07583	62.8172	F	19.1953	MZ	7.8	FALSE	FALSE	predict3214	predict32141
100	0.036418	-0.512599	-0.625	0.999354	1.33472	35.5377	7.33472	High Protein	0.517731	1.52583	62.8172	F	19.1953	MZ	7.81667	FALSE	FALSE	predict3214	predict32141
98.5	0.013475	-0.169544	0.675	1.45079	0.334722	47.9783	7.66806	High Protein	0.599307	0.745	62.8172	F	19.1953	MZ	7.85	FALSE	FALSE	predict3214	predict32141
73.6667	-0.003892	-1.01657	-0.397619	2.85928	3.16806	26.7221	13.5014	High Fat	0.742802	2.56694	62.7652	F	19.4811	MZ	7.35	FALSE	TRUE	predict3214	predict32142
81	0.023189	-0.838789	-0.580952	2.03231	3.00139	45.5137	9.66806	High Fat	0.829367	2.03444	62.7652	F	19.4811	MZ	7.38333	FALSE	TRUE	predict3214	predict32142
93.5	-0.007673	-0.237401	0.169048	2.8543	2.33472	51.6565	9.33472	High Carb	1.18967	1.58972	62.7652	F	19.4811	MZ	7.4	FALSE	FALSE	predict3214	predict32142
93.6667	-0.058603	-0.236012	-0.547619	4.16728	3.16806	60.2001	9.83472	High Carb	0.847863	0.878333	62.7652	F	19.4811	MZ	7.43333	FALSE	FALSE	predict3214	predict32142
89.6667	0.027409	-1.49712	-0.280952	2.70433	4.16806	41.3827	9.33472	OGTT	0.717168	1.04028	62.7652	F	19.4811	MZ	7.46667	FALSE	FALSE	predict3214	predict32142
88.5	0.006604	-0.183234	-0.480952	2.8395	0.001389	56.0112	12.1681	UK Average	0.928427	1.37222	62.7652	F	19.4811	MZ	7.48333	FALSE	FALSE	predict3214	predict32142
86.5	0.026818	0.422322	0.469048	2.18615	0.834722	57.7962	8.83472	OGTT	0.932652	0.409444	62.7652	F	19.4811	MZ	7.51667	FALSE	FALSE	predict3214	predict32142
87	0.054884	0.290377	0.419048	2.29975	4.00139	47.9025	11.0014	UK Average	0.947866	1.31611	62.7652	F	19.4811	MZ	7.53333	FALSE	TRUE	predict3214	predict32142
86.25	0.013578	1.10149	0.285714	3.29025	4.00139	41.683	9.83472	High Protein	0.518103	0.784167	62.7652	F	19.4811	MZ	7.56667	FALSE	TRUE	predict3214	predict32142
90	0.017348	-1.03601	-0.997619	3.4356	1.66806	39.5091	9.16806	High Fibre	1.07927	1.92556	62.7652	F	19.4811	MZ	7.6	FALSE	FALSE	predict3214	predict32142
86.5	-0.047735	0.659822	-0.214286	4.85452	2.33472	36.8564	9.00139	High Protein	0.380988	0.617778	62.7652	F	19.4811	MZ	7.61667	FALSE	FALSE	predict3214	predict32142
98.5	0.017878	0.121032	0.177381	4.04823	0.001389	42.8117	7.16806	High Fat	0.450407	0.599444	61.7659	F	20.881	DZ	7.15	FALSE	TRUE	predict3252	predict32521
100	0.026744	-0.68869	0.194048	4.19091	1.00139	39.2721	7.16806	High Carb	1.25059	0.608611	61.7659	F	20.881	DZ	7.18333	FALSE	TRUE	predict3252	predict32521
99	-0.02923	-0.308135	-0.205952	4.43811	0.001389	36.7051	7.83472	High Carb	1.09507	0.768611	61.7659	F	20.881	DZ	7.2	FALSE	FALSE	predict3252	predict32521
99.5	0.002053	0.675199	0.477381	6.54128	2.16806	29.3779	8.50139	UK Average	0.976858	0.273611	61.7659	F	20.881	DZ	7.23333	FALSE	FALSE	predict3252	predict32521
95.25	0.021582	-0.01369	0.244048	4.3271	0.001389	48.6468	8.66806	OGTT	1.53582	0.571944	61.7659	F	20.881	DZ	7.26667	FALSE	FALSE	predict3252	predict32521
99.5	0.009072	0.447421	0.444048	4.15802	0.001389	36.7184	9.33472	UK Average	1.1546	0.4125	61.7659	F	20.881	DZ	7.28333	FALSE	FALSE	predict3252	predict32521
100	-0.013322	0.334921	0.094048	4.6323	0.501389	41.5002	8.83472	OGTT	1.28707	0.757778	61.7659	F	20.881	DZ	7.31667	FALSE	FALSE	predict3252	predict32521
98	0.047769	-0.077579	0.110714	3.38457	0.001389	37.9399	9.50139	High Protein	0.894475	0.792222	61.7659	F	20.881	DZ	7.35	FALSE	TRUE	predict3252	predict32521
99.25	0.051103	-0.956746	-0.505952	3.73245	1.16806	51.9798	8.50139	High Fibre	0.990089	1.13278	61.7659	F	20.881	DZ	7.38333	FALSE	TRUE	predict3252	predict32521
98	-0.017998	0.484921	0.627381	4.12277	0.001389	39.224	6.16806	High Protein	0.717586	0.508611	61.7659	F	20.881	DZ	7.4	FALSE	FALSE	predict3252	predict32521
74	-0.041655	-0.209623	-1.21905	5.27267	0.501389	36.7309	7.83472	High Fat	0.853867	2.46333	53.4401	F	23.6772	DZ	7.28333	TRUE	FALSE	predict3281	predict32812
82.5	0.015067	-0.304067	-0.502381	3.65804	0.834722	42.1974	12.8347	High Carb	1.45071	1.72694	53.4401	F	23.6772	DZ	7.3	TRUE	FALSE	predict3281	predict32812
78.5	0.009452	-0.451289	-0.969048	2.4803	0.168056	56.8637	8.83472	High Carb	1.21939	1.76972	53.4401	F	23.6772	DZ	7.33333	TRUE	TRUE	predict3281	predict32812
74.5	0.007525	1.06677	0.347619	3.54708	0.168056	40.4781	9.16806	UK Average	1.0599	1.37194	53.4401	F	23.6772	DZ	7.36667	TRUE	TRUE	predict3281	predict32812
61.25	0.023371	0.8376	0.514286	7.8844	0.001389	52.09	9.66806	OGTT	0.950627	0.869167	53.4401	F	23.6772	DZ	7.38333	TRUE	FALSE	predict3281	predict32812
61.75	0.001554	0.082044	-0.485714	3.2105	1.50139	74.0182	9.66806	OGTT	1.18963	0.8825	53.4401	F	23.6772	DZ	7.41667	TRUE	FALSE	predict3281	predict32812
79.75	-0.00458	0.976488	0.147619	4.49782	1.00139	43.8973	8.00139	UK Average	1.17575	0.731667	53.4401	F	23.6772	DZ	7.45	TRUE	FALSE	predict3281	predict32812
77.75	-0.075743	-1.39573	-0.102381	3.16524	1.33472	33.786	7.83472	High Fibre	1.00858	1.15028	53.4401	F	23.6772	DZ	7.48333	TRUE	FALSE	predict3281	predict32812
76.75	0.020101	0.222322	0.314286	2.88792	1.66806	38.1842	10.1681	High Protein	1.07821	1.38944	53.4401	F	23.6772	DZ	7.53333	TRUE	TRUE	predict3281	predict32812
96.25	0.052613	-1.01925	-1.10833	3.29728	1.33472	29.7322	8.00139	High Fat	0.617226	2.43222	57.4757	F	19.73	MZ	7.65	TRUE	FALSE	predict3295	predict32952
98.6667	0.01868	0.132143	0.041667	4.45877	0.334722	40.8377	9.16806	High Carb	0.939871	0.700556	57.4757	F	19.73	MZ	7.68333	TRUE	FALSE	predict3295	predict32952
93.75	-0.022604	1.44325	0.558333	2.25859	0.334722	24.2058	6.66806	High Carb	1.07976	0.555833	57.4757	F	19.73	MZ	7.7	TRUE	FALSE	predict3295	predict32952
88	-0.001401	2.14603	1.45833	2.86148	1.16806	22.1892	8.33472	OGTT	0.965007	-2.34472	57.4757	F	19.73	MZ	7.73333	TRUE	TRUE	predict3295	predict32952
98	-0.01282	1.10853	-0.608333	2.8674	0.001389	36.5538	7.33472	OGTT	0.851619	0.866111	57.4757	F	19.73	MZ	6.81667	FALSE	FALSE	predict3295	predict32952
96.5	-0.017285	0.150199	-0.775	2.08444	1.16806	36.1002	7.33472	High Protein	0.554574	0.791389	57.4757	F	19.73	MZ	6.85	FALSE	FALSE	predict3295	predict32952
98	-0.012732	-0.07619	-0.158333	2.15531	0.001389	36.9054	8.16806	High Protein	0.381206	0.360833	57.4757	F	19.73	MZ	6.88333	FALSE	FALSE	predict3295	predict32952
95	-0.05837	-0.587301	-1.225	3.12215	1.16806	37.9205	8.16806	High Fibre	0.758898	0.421944	57.4757	F	19.73	MZ	6.91667	FALSE	FALSE	predict3295	predict32952
96.3333	-0.055641	-0.825793	0.459524	4.23424	0.168056	50.4591	7.00139	High Fat	0.919129	2.27861	60.7721	F	34.8482	MZ	7.3	TRUE	FALSE	predict3296	predict32961
98.25	-0.024524	0.75754	0.659524	4.25514	1.50139	50.6003	7.00139	High Carb	1.53678	0.0136111	60.7721	F	34.8482	MZ	7.33333	TRUE	TRUE	predict3296	predict32961
98	-0.00995	-0.835516	0.192857	1.70462	0.334722	40.1657	7.00139	High Carb	1.29483	0.492222	60.7721	F	34.8482	MZ	7.36667	TRUE	TRUE	predict3296	predict32961
97	0.015494	-0.907738	-0.157143	2.99653	0.834722	45.6598	6.00139	UK Average	0.784299	0.342778	60.7721	F	34.8482	MZ	7.41667	TRUE	FALSE	predict3296	predict32961
89.3333	-0.022683	1.33532	-0.357143	2.43677	0.001389	46.701	6.83472	UK Average	1.20186	0.691111	60.7721	F	34.8482	MZ	7.45	TRUE	FALSE	predict3296	predict32961
98	0.009408	-1.14802	-0.507143	2.27745	0.501389	44.8545	7.50139	OGTT	1.64947	0.751944	60.7721	F	34.8482	MZ	7.48333	TRUE	FALSE	predict3296	predict32961
88.5	-0.054498	1.11171	0.492857	2.5924	0.834722	48.4562	7.00139	High Protein	1.19387	0.248611	60.7721	F	34.8482	MZ	7.53333	TRUE	TRUE	predict3296	predict32961
84	0.019922	-1.42996	0.02619	4.29785	0.168056	50.9114	7.83472	High Fibre	1.51819	0.626389	60.7721	F	34.8482	MZ	7.56667	TRUE	TRUE	predict3296	predict32961
93	-0.012808	-0.734921	-0.780952	2.47328	1.00139	52.4977	7.16806	High Fat	0.481812	2.75694	47.8576	F	22.1269	NT	7.3	TRUE	FALSE	predict32963	predict32963
97.25	0.002238	1.75675	1.75238	4.254	3.66806	57.127	9.33472	High Carb	1.29518	0.653333	47.8576	F	22.1269	NT	7.33333	TRUE	TRUE	predict32963	predict32963
99.3333	0.024425	0.766468	1.61905	6.09339	2.50139	75.985	9.66806	High Carb	1.19101	0.838611	47.8576	F	22.1269	NT	7.36667	TRUE	TRUE	predict32963	predict32963
55.6667	0.008828	-0.646032	-0.897619	8.2202	1.83472	80.3728	9.16806	OGTT	1.22141	0.0786111	47.8576	F	22.1269	NT	7.38333	TRUE	FALSE	predict32963	predict32963
58	0.017506	-0.396032	-0.980952	8.87926	0.834722	61.9852	10.0014	OGTT	1.2325	0.184167	47.8576	F	22.1269	NT	7.41667	TRUE	FALSE	predict32963	predict32963
92	0.01233	-0.944643	-0.580952	14.529	1.16806	41.4666	12.1681	UK Average	1.04661	1.18139	47.8576	F	22.1269	NT	7.45	TRUE	FALSE	predict32963	predict32963
94.25	-0.006028	-1.20714	-1.06429	11.8302	1.00139	50.5634	7.16806	UK Average	0.673805	2.205	47.8576	F	22.1269	NT	7.48333	TRUE	FALSE	predict32963	predict32963
93	0.011853	-0.358532	-0.497619	9.87682	1.33472	66.2004	6.00139	High Protein	0.669827	1.03167	47.8576	F	22.1269	NT	7.5	TRUE	FALSE	predict32963	predict32963
84.75	0.064353	0.906746	1.86905	7.0749	4.16806	57.1048	8.66806	High Protein	1.09517	0.962778	47.8576	F	22.1269	NT	7.53333	TRUE	TRUE	predict32963	predict32963
93.6667	0.013743	0.584524	0.852381	7.7127	2.66806	56.3645	9.16806	High Fibre	1.20471	0.976111	47.8576	F	22.1269	NT	7.56667	TRUE	TRUE	predict32963	predict32963
51	-0.021075	-0.219643	-0.62619	3.62339	0.334722	51.515	6.33472	High Fat	0.978083	1.56278	53.9932	F	23.0394	DZ	6.88333	FALSE	FALSE	predict3297	predict32971
57	0.011659	-0.009921	-0.62619	2.79432	0.834722	53.6411	6.33472	High Carb	1.29503	1.74611	53.9932	F	23.0394	DZ	6.91667	FALSE	FALSE	predict3297	predict32971
59	-0.01002	-0.13631	-0.17619	1.65211	0.001389	39.5453	10.5014	High Carb	1.56181	1.69167	53.9932	F	23.0394	DZ	6.95	FALSE	TRUE	predict3297	predict32971
56	0.060423	1.45536	0.140476	1.77004	0.001389	41.2049	8.83472	UK Average	1.10651	0.432222	53.9932	F	23.0394	DZ	6.96667	FALSE	TRUE	predict3297	predict32971
48.5	0.004791	0.041468	-0.559524	3.11006	0.834722	38.8692	8.00139	OGTT	1.93924	0.256944	53.9932	F	23.0394	DZ	7	FALSE	FALSE	predict3297	predict32971
52	-0.018806	-0.480754	-0.442857	2.22709	0.168056	29.9433	11.3347	UK Average	1.11507	0.434722	53.9932	F	23.0394	DZ	7.03333	FALSE	FALSE	predict3297	predict32971
45.5	0.027802	-0.916865	-0.82619	3.13875	0.668056	29.8458	11.8347	OGTT	1.86015	0.235	53.9932	F	23.0394	DZ	7.06667	FALSE	FALSE	predict3297	predict32971
38.5	0.037498	-0.19881	0.42381	10.4069	0.168056	16.4934	7.16806	High Fibre	1.08321	0.329444	53.9932	F	23.0394	DZ	7.08333	FALSE	FALSE	predict3297	predict32971
58	0.035294	-1.38393	-0.786905	0.690968	0.501389	18.3814	7.83472	High Carb	1.3761	0.311667	63.707	F	27.8906	DZ	7.35	FALSE	TRUE	predict3319	predict33192
53	0.020459	0.181349	0.063095	0.906378	2.66806	27.4791	7.16806	High Carb	1.22299	0.790278	63.707	F	27.8906	DZ	7.38333	FALSE	TRUE	predict3319	predict33192
59	-0.064219	-1.48671	-1.97024	2.30239	0.834722	21.6807	8.33472	OGTT	1.84256	0.213889	63.707	F	27.8906	DZ	7.4	FALSE	FALSE	predict3319	predict33192
47.6667	0.016227	0.524405	-0.270238	2.07387	0.668056	26.0831	9.16806	UK Average	1.1765	0.326667	63.707	F	27.8906	DZ	7.43333	FALSE	FALSE	predict3319	predict33192
56	-0.06059	-0.733929	-0.370238	2.26506	0.001389	25.9366	7.83472	OGTT	1.61275	0.22	63.707	F	27.8906	DZ	7.46667	FALSE	FALSE	predict3319	predict33192
53.3333	0.01027	-0.668651	0.179762	2.48655	0.001389	25.4883	9.16806	UK Average	1.06499	0.207222	63.707	F	27.8906	DZ	7.48333	FALSE	FALSE	predict3319	predict33192
67.25	-0.006818	1.17202	1.77619	2.69509	1.00139	111.221	8.66806	MCB	0.743933	2.4025	40.5914	F	22.451	MZ	8.08333	FALSE	TRUE	predict3321	predict33211
55	0.020957	1.67758	2.32619	3.05815	0.168056	102.757	9.83472	High Carb	0.308316	2.68806	40.5914	F	22.451	MZ	8.06667	FALSE	TRUE	predict3321	predict33211
55.3333	-0.041776	0.231746	-1.44048	5.34156	0.001389	174.087	10.3347	High Carb	1.53254	3.11528	40.5914	F	22.451	MZ	8.06667	FALSE	FALSE	predict3321	predict33211
58.75	-0.041927	-1.14186	-1.54048	3.54531	0.834722	33.3949	8.00139	UK Average	1.51737	3.04083	40.5914	F	22.451	MZ	8.05	FALSE	FALSE	predict3321	predict33211
60.6667	-0.070811	0.159524	-0.62381	3.33475	1.66806	39.908	8.00139	OGTT	1.65659	2.19278	40.5914	F	22.451	MZ	8.05	FALSE	FALSE	predict3321	predict33211
48	-0.006953	-0.655754	-0.540476	6.75913	0.668056	197.301	12.5014	OGTT	1.69511	2.19333	40.5914	F	22.451	MZ	8.03333	FALSE	FALSE	predict3321	predict33211
66.4	0.060583	-0.104365	-0.52381	5.07165	2.16806	36.8145	7.33472	UK Average	1.29528	4.51833	40.5914	F	22.451	MZ	8.03333	FALSE	FALSE	predict3321	predict33211
59.25	-0.000306	0.866468	1.62619	2.95518	1.50139	108.965	7.16806	High Protein	0.909946	2.78917	40.5914	F	22.451	MZ	8.01667	FALSE	TRUE	predict3321	predict33211
60.2	0.108767	-0.607143	1.39286	4.35324	4.00139	156.067	9.66806	High Fat	0.520499	2.785	40.5914	F	22.451	MZ	8	FALSE	TRUE	predict3321	predict33211
75.3333	-0.019149	-0.625198	-1.49048	4.71696	0.001389	54.8058	10.0014	High Fibre	1.1034	2.22139	40.5914	F	22.451	MZ	8	FALSE	FALSE	predict3321	predict33211
100	0.01995	0.102282	0.333333	3.51683	0.834722	33.6357	12.8347	High Fat	0.9572	0.357222	46.7844	M	20.7789	DZ	6.56667	TRUE	TRUE	predict333	predict3331
85.6667	-0.02372	-0.44494	1.86667	6.88198	2.16806	126.621	7.83472	High Carb	1.20455	0.733611	46.7844	M	20.7789	DZ	6.6	TRUE	TRUE	predict333	predict3331
84.25	-0.050071	1.08839	-0.583333	5.59295	0.001389	49.6774	9.66806	High Carb	0.842998	1.05	46.7844	M	20.7789	DZ	6.63333	TRUE	FALSE	predict333	predict3331
62.5	0.017624	-1.43522	-0.583333	3.46114	0.668056	26.6248	6.66806	OGTT	1.07438	0.201944	46.7844	M	20.7789	DZ	6.65	TRUE	FALSE	predict333	predict3331
68.6667	-0.048879	-2.13244	-1.03333	2.44648	1.16806	37.0177	12.5014	OGTT	1.02239	0.505	46.7844	M	20.7789	DZ	6.68333	TRUE	FALSE	predict333	predict3331
53.5	-0.008053	1.27173	0.466667	3.07302	1.16806	41.8775	7.00139	UK Average	0.74488	-0.379444	46.7844	M	20.7789	DZ	6.7	TRUE	FALSE	predict333	predict3331
77.5	-0.021587	0.106449	-0.566667	2.30873	1.00139	41.2691	10.0014	UK Average	1.04879	0.441111	46.7844	M	20.7789	DZ	6.73333	TRUE	FALSE	predict333	predict3331
77.25	0.017002	-0.386607	1.18333	4.24235	1.33472	34.8724	12.1681	High Protein	1.09134	-0.423333	46.7844	M	20.7789	DZ	6.76667	TRUE	TRUE	predict333	predict3331
80	0.036338	-0.899107	-0.016667	4.49303	1.83472	87.8595	7.50139	High Fibre	1.09175	0.913611	46.7844	M	20.7789	DZ	6.78333	TRUE	TRUE	predict333	predict3331
66.6667	0.003918	2.15923	0	2.68807	0.001389	49.9427	8.00139	High Protein	0.862085	0.304444	46.7844	M	20.7789	DZ	6.81667	TRUE	FALSE	predict333	predict3331
55.5	-0.0665	3.30844	2.82564	1.78673	1.00139	26.7703	6.00139	High Fat	0.66594	-1.34306	46.7844	M	23.9919	DZ	6.56667	TRUE	TRUE	predict333	predict3332
72.25	0.029139	0.887607	1.19231	1.97942	0.501389	44.3457	9.66806	High Carb	1.34913	0.274444	46.7844	M	23.9919	DZ	6.6	TRUE	TRUE	predict333	predict3332
64.5	0.001862	-0.540171	-0.641026	2.65158	0.168056	48.7345	7.83472	High Carb	1.39982	2.15667	46.7844	M	23.9919	DZ	6.63333	TRUE	FALSE	predict333	predict3332
69	-0.029403	0.601496	-0.641026	2.61619	0.001389	21.7472	6.16806	UK Average	1.16198	2.00889	46.7844	M	23.9919	DZ	6.65	TRUE	FALSE	predict333	predict3332
60.75	0.029074	-0.737393	-0.641026	4.67316	0.834722	27.5274	7.66806	OGTT	1.60617	3.29806	46.7844	M	23.9919	DZ	6.68333	TRUE	FALSE	predict333	predict3332
57	0.015548	-1.16934	-0.641026	2.47059	0.834722	28.4975	11.1681	OGTT	1.56023	1.99222	46.7844	M	23.9919	DZ	6.73333	TRUE	FALSE	predict333	predict3332
46	-0.006567	1.189	2.09231	3.90949	0.001389	22.556	10.6681	High Protein	0.754744	0.598889	46.7844	M	23.9919	DZ	6.76667	TRUE	TRUE	predict333	predict3332
63.6667	0.000141	0.838996	0.392308	2.06173	1.66806	25.6096	9.00139	High Fibre	1.11625	1.30944	46.7844	M	23.9919	DZ	6.78333	TRUE	TRUE	predict333	predict3332
83.5	0.018082	-1.74156	-1.15769	2.8102	1.00139	43.8389	8.00139	High Protein	0.784515	2.52306	46.7844	M	23.9919	DZ	6.81667	TRUE	FALSE	predict333	predict3332
47.25	-0.105644	-0.864782	0.203571	3.85042	1.50139	26.5036	6.66806	High Carb	0.586728	0.574167	54.3354	F	23.8665	DZ	8.08333	FALSE	TRUE	predict3384	predict33841
77.5	-0.110479	0.501885	1.27024	2.87257	1.33472	29.5389	7.50139	High Carb	0.664656	0.742222	54.3354	F	23.8665	DZ	8.06667	FALSE	TRUE	predict3384	predict33841
72	-0.030097	0.511607	0.103571	3.05247	0.668056	35.2857	8.16806	UK Average	0.515164	0.557222	54.3354	F	23.8665	DZ	8.06667	FALSE	FALSE	predict3384	predict33841
56.5	-0.005742	-0.720337	-0.663095	3.13388	0.668056	33.283	6.83472	UK Average	0.198079	0.899722	54.3354	F	23.8665	DZ	8.05	FALSE	FALSE	predict3384	predict33841
62.3333	0.053491	-1.04256	-0.963095	2.57236	0.334722	28.8041	12.1681	OGTT	1.00548	0.542778	54.3354	F	23.8665	DZ	8.05	FALSE	FALSE	predict3384	predict33841
47.6667	-0.008495	0.381052	-0.013095	4.32311	0.001389	35.7697	6.50139	OGTT	1.46032	0.0569444	54.3354	F	23.8665	DZ	8.03333	FALSE	FALSE	predict3384	predict33841
74.3333	-0.004002	0.128274	-0.579762	3.95925	0.001389	33.8187	8.33472	High Fat	0.345561	1	54.3354	F	23.8665	DZ	8.03333	FALSE	FALSE	predict3384	predict33841
82.75	0.008621	0.368552	0.336905	4.17326	2.33472	29.0876	7.33472	High Protein	0.464412	2.31861	54.3354	F	23.8665	DZ	8.01667	FALSE	TRUE	predict3384	predict33841
71.75	0.035814	-0.298115	0.836905	3.43228	1.66806	32.1245	9.83472	High Fibre	1.05088	0.7375	54.3354	F	23.8665	DZ	8	FALSE	TRUE	predict3384	predict33841
85	0.008375	-0.173711	0.064286	1.75826	0.001389	35.831	9.00139	High Fat	1.12352	1.425	64.5613	F	21.8907	DZ	7.53333	FALSE	TRUE	predict3422	predict34221
95	0.018834	-1.08482	-1.31905	2.97049	0.334722	34.1296	11.0014	High Carb	1.14123	0.427778	64.5613	F	21.8907	DZ	7.56667	FALSE	TRUE	predict3422	predict34221
89.5	-0.011107	-0.852877	-0.769048	2.28117	0.334722	38.6287	6.66806	High Carb	1.39895	0.345833	64.5613	F	21.8907	DZ	7.6	FALSE	FALSE	predict3422	predict34221
85	-0.013835	-0.463988	-0.185714	1.08625	0.334722	32.3927	10.5014	UK Average	1.33891	0.248611	64.5613	F	21.8907	DZ	7.61667	FALSE	FALSE	predict3422	predict34221
77.3333	0.034687	0.386012	-0.535714	2.04518	1.66806	42.7831	8.00139	UK Average	1.2879	0.511389	64.5613	F	21.8907	DZ	7.65	FALSE	FALSE	predict3422	predict34221
76.6667	0.031937	0.222123	0.164286	2.54124	0.001389	33.4099	7.66806	OGTT	1.50334	0.6375	64.5613	F	21.8907	DZ	7.66667	FALSE	FALSE	predict3422	predict34221
65.5	0.027417	0.0749	0.730952	1.42092	0.168056	23.1666	8.66806	OGTT	1.22626	0.414167	64.5613	F	21.8907	DZ	7.68333	FALSE	FALSE	predict3422	predict34221
71.3333	-0.035727	0.6124	0.730952	2.76427	1.83472	28.6222	9.83472	High Protein	0.755128	0.354444	64.5613	F	21.8907	DZ	7.71667	FALSE	TRUE	predict3422	predict34221
75.3333	0.033626	0.5999	0.814286	2.77854	2.33472	31.8907	9.50139	High Fibre	1.35153	0.433333	64.5613	F	21.8907	DZ	7.73333	FALSE	TRUE	predict3422	predict34221
77	-0.022548	-0.344544	-0.035714	1.39406	0.001389	28.9184	13.0014	High Protein	0.946838	0.241667	64.5613	F	21.8907	DZ	7.76667	FALSE	FALSE	predict3422	predict34221
67.5	0.017683	0.511111	0.747619	3.81004	1.50139	39.9266	8.83472	High Fat	0.384172	0.459722	58.4969	F	20.9751	DZ	6.88333	FALSE	FALSE	predict343	predict3431
77.3333	0.005932	-0.219445	-1.05238	3.4682	0.334722	39.2721	11.1681	High Carb	1.72455	0.544444	58.4969	F	20.9751	DZ	6.91667	FALSE	FALSE	predict343	predict3431
60	0.01163	-0.120834	-0.585714	1.41876	0.334722	38.4288	7.33472	High Carb	1.63455	0.85	58.4969	F	20.9751	DZ	6.95	FALSE	TRUE	predict343	predict3431
53	-0.048021	2.45972	2.93095	1.41675	0.001389	36.1936	10.6681	UK Average	1.33631	-1.44444	58.4969	F	20.9751	DZ	6.96667	FALSE	TRUE	predict343	predict3431
94	0.036139	-1.97639	-2.16905	3.66658	0.334722	33.9862	10.6681	OGTT	1.4654	2.16833	58.4969	F	20.9751	DZ	7	FALSE	FALSE	predict343	predict3431
67.75	0.039622	-0.111111	0.197619	3.76649	0.834722	41.991	5.66806	UK Average	1.44852	0.189167	58.4969	F	20.9751	DZ	7.03333	FALSE	FALSE	predict343	predict3431
57.6667	0.019429	-0.368056	-0.202381	2.97942	0.001389	52.3604	10.8347	High Fibre	1.27835	0.191667	58.4969	F	20.9751	DZ	7.08333	FALSE	FALSE	predict343	predict3431
45	0.015236	0.444444	0.514286	1.50491	0.168056	48.2236	9.50139	High Protein	0.983897	0.280556	58.4969	F	20.9751	DZ	7.11667	FALSE	FALSE	predict343	predict3431
37	-0.047074	2.79444	3.56429	1.14845	0.501389	58.9082	10.3347	High Protein	0.912405	-2.70278	58.4969	F	20.9751	DZ	7.15	FALSE	TRUE	predict343	predict3431
49.6667	-0.036232	2.20327	2	3.27358	0.001389	39.3592	8.50139	High Fat	0.941893	0.433333	58.4969	F	26.2865	DZ	6.88333	FALSE	FALSE	predict343	predict3432
83	0.048851	-2.03423	-1.46667	6.0542	3.00139	20.6707	10.3347	High Carb	1.37656	4.77806	58.4969	F	26.2865	DZ	6.91667	FALSE	FALSE	predict343	predict3432
73.3333	0.029111	1.15605	2.15	5.59354	0.001389	36.4885	8.00139	High Carb	1.32617	0.617778	58.4969	F	26.2865	DZ	6.95	FALSE	TRUE	predict343	predict3432
54.6667	-0.032912	1.21994	1.73333	3.80961	0.501389	32.7459	11.3347	UK Average	1.31821	1.43667	58.4969	F	26.2865	DZ	6.96667	FALSE	TRUE	predict343	predict3432
89.3333	-0.040044	1.07689	0.7	3.25126	0.501389	34.5584	10.3347	UK Average	1.2873	1.23056	58.4969	F	26.2865	DZ	7	FALSE	FALSE	predict343	predict3432
89.25	-0.033133	-0.043948	0.333333	2.90271	0.668056	29.603	5.50139	OGTT	1.65059	1.75556	58.4969	F	26.2865	DZ	7.03333	FALSE	FALSE	predict343	predict3432
91	0.062817	-1.39256	-1.03333	3.37671	0.001389	31.1387	8.50139	OGTT	1.65202	2.96778	58.4969	F	26.2865	DZ	7.06667	FALSE	FALSE	predict343	predict3432
92	0.012325	-2.32312	-3.38333	9.34223	0.001389	25.4651	5.66806	High Protein	1.11513	5.33278	58.4969	F	26.2865	DZ	7.08333	FALSE	FALSE	predict343	predict3432
89	0.040177	-3.36478	-2.75	7.88325	0.668056	28.2857	9.16806	High Protein	1.13573	4.71222	58.4969	F	26.2865	DZ	7.11667	FALSE	FALSE	predict343	predict3432
90.75	-0.043683	3.41161	2.95	5.03721	1.00139	34.0207	9.33472	High Fibre	1.16882	0.438056	58.4969	F	26.2865	DZ	7.15	FALSE	TRUE	predict343	predict3432
45	-0.010166	0.529762	0.071429	4.74254	0.001389	36.8311	8.00139	OGTT	1.09612	0.521111	57.9083	F	28.6346	DZ	6.95	FALSE	TRUE	predict3463	predict34631
51.5	0.027642	-1.22718	-0.828571	3.83271	0.001389	47.3634	6.50139	UK Average	1.04499	0.240278	57.9083	F	28.6346	DZ	6.96667	FALSE	TRUE	predict3463	predict34631
50.5	0.022984	1.5256	0.204762	3.07969	0.334722	48.8178	11.1681	OGTT	1.31295	0.164167	57.9083	F	28.6346	DZ	7	FALSE	FALSE	predict3463	predict34631
66	0.012268	-1.9869	-1.07857	1.95122	0.001389	37.3354	6.16806	UK Average	1.00474	0.244444	57.9083	F	28.6346	DZ	7.03333	FALSE	FALSE	predict3463	predict34631
49.3333	-0.081342	0.125595	-1.21191	1.46762	0.334722	37.8732	9.83472	High Protein	0.834193	0.147222	57.9083	F	28.6346	DZ	7.06667	FALSE	FALSE	predict3463	predict34631
55	-0.029138	-2.45774	-1.4119	2.93021	0.001389	42.4705	5.66806	High Protein	0.946282	0.46	57.9083	F	28.6346	DZ	7.08333	FALSE	FALSE	predict3463	predict34631
53.5	-0.037525	0.842262	-1.32857	4.57683	0.501389	40.6747	7.00139	High Fibre	1.00277	0.195833	57.9083	F	28.6346	DZ	7.11667	FALSE	FALSE	predict3463	predict34631
25	0.03189	-0.488789	0.396429	4.17948	0.668056	41.185	7.83472	MCB	0.832041	0.616667	59.4634	F	28.6445	DZ	7.91667	FALSE	TRUE	predict3465	predict34651
39	0.019427	1.68899	0.513095	2.23706	0.168056	25.3371	7.66806	High Carb	0.983648	0.335	59.4634	F	28.6445	DZ	7.9	FALSE	TRUE	predict3465	predict34651
43	-0.013154	-1.35823	-0.536905	2.70836	1.66806	41.6408	8.33472	High Carb	1.22073	0.293056	59.4634	F	28.6445	DZ	7.88333	FALSE	FALSE	predict3465	predict34651
46	0.0253	-1.22212	-0.803571	3.54972	0.001389	33.3714	7.16806	UK Average	1.03344	0.152778	59.4634	F	28.6445	DZ	7.86667	FALSE	FALSE	predict3465	predict34651
44	0.003169	-0.331845	0.463095	5.16643	0.001389	41.5683	7.83472	UK Average	0.861205	0.085	59.4634	F	28.6445	DZ	7.85	FALSE	FALSE	predict3465	predict34651
40	-0.036506	0.393155	0.763095	3.81928	0.168056	42.1366	8.16806	OGTT	1.52049	-2.365	59.4634	F	28.6445	DZ	7.83333	FALSE	FALSE	predict3465	predict34651
17	-0.00276	-1.78046	-2.5869	3.99693	0.001389	46.9612	8.16806	OGTT	1.55084	0.258333	59.4634	F	28.6445	DZ	7.8	FALSE	FALSE	predict3465	predict34651
29	0.026303	-0.311012	0.196429	2.88726	2.33472	41.9961	7.50139	High Fat	0.850029	0.0333333	59.4634	F	28.6445	DZ	7.78333	FALSE	TRUE	predict3465	predict34651
60.75	0.030915	-0.542659	-0.265476	3.79837	0.334722	45.7194	8.00139	MCB	0.741775	0.433333	59.4634	F	25.9689	DZ	7.91667	FALSE	TRUE	predict3465	predict34652
76.5	0.030944	-0.723215	0.567857	4.88913	0.668056	48.8888	7.00139	High Carb	0.91888	0.285833	59.4634	F	25.9689	DZ	7.9	FALSE	TRUE	predict3465	predict34652
73.75	0.022154	-0.606548	-0.84881	2.71197	0.001389	24.523	7.83472	High Carb	0.921263	0.228611	59.4634	F	25.9689	DZ	7.88333	FALSE	FALSE	predict3465	predict34652
59	0.004355	0.430952	-0.34881	4.92084	0.334722	42.9057	7.83472	OGTT	0.983154	0.195556	59.4634	F	25.9689	DZ	7.86667	FALSE	FALSE	predict3465	predict34652
48	-0.106267	-0.90377	-1.09881	3.7437	1.16806	42.6139	7.66806	UK Average	0.864113	0.676944	59.4634	F	25.9689	DZ	7.85	FALSE	FALSE	predict3465	predict34652
64	-0.054433	1.78929	0.884524	3.84513	0.334722	42.7445	7.83472	UK Average	0.957642	-0.934167	59.4634	F	25.9689	DZ	7.83333	FALSE	FALSE	predict3465	predict34652
60.6667	0.008976	-0.570437	-0.415476	4.08147	0.001389	41.7058	8.16806	OGTT	1.04138	0.155833	59.4634	F	25.9689	DZ	7.8	FALSE	FALSE	predict3465	predict34652
72	0.02209	-0.613492	0.75119	3.28438	0.501389	46.3502	7.50139	High Fibre	0.740989	0.174167	59.4634	F	25.9689	DZ	7.78333	FALSE	TRUE	predict3465	predict34652
67.5	0.036164	1.51984	1.86786	2.79781	0.334722	48.2261	7.83472	High Fat	0.343104	0.0513889	59.4634	F	25.9689	DZ	7.76667	FALSE	TRUE	predict3465	predict34652
59.3333	-0.005142	-0.589881	-0.29881	3.39206	0.334722	28.908	9.00139	High Protein	0.462986	0.137222	59.4634	F	25.9689	DZ	7.73333	FALSE	FALSE	predict3465	predict34652
93.5	-0.012915	0.011432	-0.208974	7.5315	2.00139	38.6741	13.5014	High Fat	0.8422	3.98222	46.8446	M	23.766	MZ	6.33333	TRUE	FALSE	predict373	predict3732
94.6667	0.048699	-1.66635	-0.792308	5.68272	2.00139	42.2506	8.00139	High Fat	0.749001	3.72333	46.8446	M	23.766	MZ	6.36667	TRUE	FALSE	predict373	predict3732
98.3333	-0.026448	0.190599	1.12436	6.70862	4.83472	53.5095	10.6681	High Carb	0.57669	2.18361	46.8446	M	23.766	MZ	6.38333	TRUE	TRUE	predict373	predict3732
99.75	0.009921	0.666988	0.457692	6.24731	3.00139	57.5772	9.83472	High Carb	0.547153	2.35778	46.8446	M	23.766	MZ	6.41667	TRUE	TRUE	predict373	predict3732
100	0.008615	1.4406	1.20769	6.91743	1.66806	42.9119	10.1681	OGTT	1.1342	2.635	46.8446	M	23.766	MZ	6.45	TRUE	FALSE	predict373	predict3732
100	-0.045216	0.394765	1.00769	8.47072	2.00139	40.2326	12.6681	OGTT	1.2447	-0.88	46.8446	M	23.766	MZ	6.46667	TRUE	FALSE	predict373	predict3732
100	-0.012091	0.186432	1.12436	9.46862	2.00139	47.0819	9.50139	UK Average	0.643176	1.47111	46.8446	M	23.766	MZ	6.5	TRUE	FALSE	predict373	predict3732
99.75	0.00355	0.933654	0.457692	10.8861	0.001389	48.1893	8.66806	High Fibre	0.714313	1.71528	46.8446	M	23.766	MZ	6.55	TRUE	FALSE	predict373	predict3732
100	0.034512	-2.36357	-4.02564	5.37681	1.33472	29.4856	10.0014	High Protein	0.539105	2.38389	46.8446	M	23.766	MZ	6.56667	TRUE	TRUE	predict373	predict3732
100	-0.023284	-0.626068	-1.62564	7.03633	1.33472	32.9603	11.6681	High Protein	0.430901	2.36	46.8446	M	23.766	MZ	6.6	TRUE	TRUE	predict373	predict3732
54.5	0.029294	-0.652976	-0.202381	2.62414	0.834722	38.591	12.3347	MCB	0.819872	1.24389	46.976	M	26.8078	DZ	5.73333	TRUE	FALSE	predict396	predict3961
48	0.052832	-0.452976	-0.169048	5.73594	0.334722	38.7603	10.3347	High Carb	0.740649	1.08806	46.976	M	26.8078	DZ	5.7	TRUE	FALSE	predict396	predict3961
46	-0.030894	-1.11548	-0.052381	6.58198	0.001389	39.367	6.83472	High Carb	1.0782	0.983889	46.976	M	26.8078	DZ	5.66667	TRUE	TRUE	predict396	predict3961
46.75	0.015727	0.749802	1.23095	7.13597	0.834722	64.9043	10.5014	UK Average	0.61893	0.446944	46.976	M	26.8078	DZ	5.63333	TRUE	TRUE	predict396	predict3961
51.5	0.033236	-0.291865	0.064286	13.5785	0.001389	86.3058	9.50139	UK Average	0.732208	0.753056	46.976	M	26.8078	DZ	5.6	TRUE	FALSE	predict396	predict3961
46.25	0.028525	-0.848809	-0.335714	18.3403	0.334722	48.4437	10.8347	OGTT	0.789311	0.849722	46.976	M	26.8078	DZ	5.56667	TRUE	FALSE	predict396	predict3961
48.8	0.032496	-1.39742	-0.652381	20.8809	1.16806	51.3177	11.5014	OGTT	0.755099	0.6675	46.976	M	26.8078	DZ	5.55	TRUE	FALSE	predict396	predict3961
54	0.000197	-0.059921	-0.085714	28.234	0.001389	87.9741	6.66806	High Fat	0.653243	0.909167	46.976	M	26.8078	DZ	5.48333	TRUE	FALSE	predict396	predict3961
58.3333	-0.020378	-0.139087	0.364286	26.3733	1.66806	54.5091	10.5014	High Protein	0.417779	1.21833	46.976	M	26.8078	DZ	5.45	TRUE	TRUE	predict396	predict3961
71.5	0.043999	-2.44395	-0.132143	4.05453	0.501389	31.7434	7.33472	MCB	1.04792	2.03472	46.976	M	24.5066	DZ	5.73333	TRUE	FALSE	predict396	predict3962
73.5	-0.098277	0.064385	0.00119	3.66898	0.501389	30.0069	6.33472	High Carb	1.25489	1.67944	46.976	M	24.5066	DZ	5.7	TRUE	FALSE	predict396	predict3962
65.6667	-0.061527	0.256052	0.134524	4.77579	1.16806	39.4152	10.8347	High Carb	1.12214	1.53083	46.976	M	24.5066	DZ	5.66667	TRUE	TRUE	predict396	predict3962
60	0.005672	-1.04117	0.267857	5.53976	2.16806	62.6749	10.6681	UK Average	0.871678	1.36361	46.976	M	24.5066	DZ	5.63333	TRUE	TRUE	predict396	predict3962
76	-0.056854	0.874107	0.667857	6.46229	2.33472	43.169	9.50139	OGTT	0.657736	0.783333	46.976	M	24.5066	DZ	5.6	TRUE	FALSE	predict396	predict3962
81.75	-0.048671	-0.337004	-0.14881	9.83698	0.001389	31.1166	12.0014	High Fibre	0.78606	0.339444	46.976	M	24.5066	DZ	5.51667	TRUE	FALSE	predict396	predict3962
92.3333	0.072183	0.506052	0.467857	6.7186	2.00139	79.1493	7.00139	High Protein	0.438012	0.890833	46.976	M	24.5066	DZ	5.48333	TRUE	FALSE	predict396	predict3962
75	-0.003415	-0.127281	-0.09881	3.72926	1.00139	29.7577	9.50139	High Fat	0.573853	1.74472	46.976	M	24.5066	DZ	5.45	TRUE	TRUE	predict396	predict3962
44.75	0.000188	-0.402457	-0.402564	3.9166	1.00139	29.3905	10.8347	High Fat	1.02218	0.272222	52.7118	M	33.2597	DZ	6.7	TRUE	FALSE	predict406	predict4062
62	0.021956	0.408654	-0.585897	2.73191	1.00139	22.7102	8.66806	High Carb	1.29168	0.423611	52.7118	M	33.2597	DZ	6.73333	TRUE	FALSE	predict406	predict4062
55	-0.034075	2.12115	2.24744	2.91893	0.834722	36.3774	8.50139	High Carb	1.39342	0.681944	52.7118	M	33.2597	DZ	6.76667	TRUE	TRUE	predict406	predict4062
63	0.022143	0.90032	1.28077	4.13774	0.168056	22.1662	9.00139	UK Average	1.31586	0.433333	52.7118	M	33.2597	DZ	6.78333	TRUE	TRUE	predict406	predict4062
47.5	0.008761	-2.9969	-4.11923	4.95621	0.668056	31.1572	6.16806	UK Average	1.00225	3.90278	52.7118	M	33.2597	DZ	6.86667	TRUE	FALSE	predict406	predict4062
39	0.014749	-0.434402	-0.585897	1.97854	1.16806	30.0036	9.16806	High Protein	0.980382	0.377778	52.7118	M	33.2597	DZ	6.91667	TRUE	FALSE	predict406	predict4062
57.5	-0.051068	2.10726	2.09744	2.87235	1.16806	34.7523	6.83472	High Fibre	1.50601	0.469444	52.7118	M	33.2597	DZ	6.95	TRUE	TRUE	predict406	predict4062
45.3333	-0.008807	0.108334	-0.914286	4.86404	1.16806	34.6078	11.1681	High Fat	0.605354	1.15556	51.9124	F	19.7162	MZ	7.31667	FALSE	FALSE	predict463	predict4631
79	0.030773	0.143056	1.33571	5.5661	2.00139	35.8642	6.83472	High Carb	1.17082	1.03722	51.9124	F	19.7162	MZ	7.35	FALSE	TRUE	predict463	predict4631
74.6	0.021585	0.397222	0.852381	4.51069	3.00139	46.2831	8.83472	High Carb	1.02427	1.53278	51.9124	F	19.7162	MZ	7.38333	FALSE	TRUE	predict463	predict4631
67	0.038339	-0.6625	-0.747619	3.71363	0.001389	39.8266	8.16806	UK Average	1.06899	0.746667	51.9124	F	19.7162	MZ	7.4	FALSE	FALSE	predict463	predict4631
61.3333	0.003859	0.036111	-0.614286	4.98551	2.00139	36.3024	6.83472	UK Average	1.1321	0.694722	51.9124	F	19.7162	MZ	7.43333	FALSE	FALSE	predict463	predict4631
51	-0.045607	-0.586111	-0.847619	5.45058	1.00139	47.3022	9.83472	OGTT	0.857025	0.956111	51.9124	F	19.7162	MZ	7.46667	FALSE	FALSE	predict463	predict4631
41	0.03628	-1.0375	-0.847619	2.94352	1.16806	39.7457	6.83472	OGTT	0.707348	0.906944	51.9124	F	19.7162	MZ	7.48333	FALSE	FALSE	predict463	predict4631
54.3333	-0.02086	-0.819444	-0.880952	4.59208	1.33472	37.5803	6.83472	High Fibre	0.920129	0.615278	51.9124	F	19.7162	MZ	7.51667	FALSE	FALSE	predict463	predict4631
68.5	-0.033976	0.048611	-0.030952	3.18383	0.001389	36.3117	7.33472	High Protein	0.43621	1.19111	51.9124	F	19.7162	MZ	7.53333	FALSE	TRUE	predict463	predict4631
53	0.007137	-0.102778	1.41905	2.46624	2.66806	43.8976	9.16806	High Protein	0.663694	0.4925	51.9124	F	19.7162	MZ	7.56667	FALSE	TRUE	predict463	predict4631
70.6667	-0.035869	-0.670833	-0.666667	2.92699	0.668056	50.0823	7.66806	High Fat	0.727603	3.17417	51.9124	F	20.1096	MZ	7.31667	FALSE	FALSE	predict463	predict4632
97	-0.021905	0.408334	0.85	3.35738	1.66806	66.9644	7.16806	High Carb	1.17853	0.657222	51.9124	F	20.1096	MZ	7.35	FALSE	TRUE	predict463	predict4632
92.5	-0.017963	1.08333	0.85	3.66951	0.001389	47.943	9.83472	High Carb	1.19962	0.567778	51.9124	F	20.1096	MZ	7.38333	FALSE	TRUE	predict463	predict4632
70	0.007726	-0.268055	-0.383333	3.86986	1.33472	54.09	10.3347	OGTT	1.04876	0.775	51.9124	F	20.1096	MZ	7.4	FALSE	FALSE	predict463	predict4632
81	-0.063278	1.16806	0.433333	5.01461	2.16806	43.1431	8.50139	UK Average	1.08957	0.429167	51.9124	F	20.1096	MZ	7.43333	FALSE	FALSE	predict463	predict4632
79.3333	0.03545	0.533334	0.416667	4.50684	1.00139	37.0786	10.6681	OGTT	1.14122	0.240833	51.9124	F	20.1096	MZ	7.46667	FALSE	FALSE	predict463	predict4632
84	0.020536	1.66111	0.016667	3.14555	0.334722	28.0965	8.16806	High Protein	0.379771	0.908333	51.9124	F	20.1096	MZ	7.51667	FALSE	FALSE	predict463	predict4632
86	0.020091	-0.625	0.066667	2.25959	2.50139	59.3122	7.50139	High Protein	0.644442	1.01833	51.9124	F	20.1096	MZ	7.53333	FALSE	TRUE	predict463	predict4632
65.6667	-0.006186	1.66945	0.616667	2.67194	0.001389	54.4121	8.16806	High Fibre	1.00934	0.330278	51.9124	F	20.1096	MZ	7.56667	FALSE	TRUE	predict463	predict4632
74.25	-0.017311	-0.494658	-1.01923	3.48456	0.001389	47.6527	6.00139	High Fat	0.862596	1.92417	52.627	F	26.1175	DZ	6.7	TRUE	FALSE	predict479	predict4791
73.5	-0.005103	-0.612714	-1.01923	3.36001	0.001389	55.4155	5.00139	High Carb	0.957441	1.90556	52.627	F	26.1175	DZ	6.73333	TRUE	FALSE	predict479	predict4791
60	-0.026791	-1.14188	1.74744	3.56929	0.668056	67.1202	5.00139	High Carb	1.45223	0.968056	52.627	F	26.1175	DZ	6.76667	TRUE	TRUE	predict479	predict4791
73	-0.025169	1.54423	1.59744	1.98599	0.001389	60.2646	8.83472	UK Average	1.26906	1.16139	52.627	F	26.1175	DZ	6.78333	TRUE	TRUE	predict479	predict4791
62.6667	0.027871	-0.561325	-1.51923	9.66798	-5.16528	82.0307	6.66806	UK Average	1.43304	2.64861	52.627	F	26.1175	DZ	6.86667	TRUE	FALSE	predict479	predict4791
68.5	0.009052	-0.476603	-1.51923	10.9738	0.001389	54.548	4.83472	High Protein	0.905996	2.43444	52.627	F	26.1175	DZ	6.9	TRUE	FALSE	predict479	predict4791
54	0.028179	0.488675	-0.619231	1.55398	0.334722	51.4092	4.50139	High Protein	0.937634	1.98639	52.627	F	26.1175	DZ	6.91667	TRUE	FALSE	predict479	predict4791
64.5	0.012938	0.584508	0.830769	2.84835	0.668056	61.8218	5.50139	High Fibre	1.54828	1.23583	52.627	F	26.1175	DZ	6.95	TRUE	TRUE	predict479	predict4791
93.5	0.01642	-2.37818	-0.195238	3.88598	0.001389	96.6574	6.16806	High Fat	0.394587	2.49306	52.627	F	30.3244	DZ	6.68333	TRUE	FALSE	predict479	predict4792
95.75	0.051686	0.769047	-0.278571	5.32825	0.001389	64.5346	4.83472	High Fat	0.725211	0.551944	52.627	F	30.3244	DZ	6.7	TRUE	FALSE	predict479	predict4792
73.3333	0.069536	-1.06567	-1.6619	3.52671	0.168056	74.3778	5.16806	High Carb	1.3292	7.05361	52.627	F	30.3244	DZ	6.73333	TRUE	FALSE	predict479	predict4792
66.6667	0.019625	-0.011508	-0.111905	4.12969	0.501389	67.7643	6.16806	High Carb	1.14189	3.74389	52.627	F	30.3244	DZ	6.76667	TRUE	TRUE	predict479	predict4792
48	-0.021903	-1.37679	0.254762	1.97055	0.001389	48.9539	6.33472	OGTT	1.19429	3.6125	52.627	F	30.3244	DZ	6.78333	TRUE	TRUE	predict479	predict4792
63	0.040297	-0.103175	-0.045238	5.82233	0.001389	98.566	10.6681	UK Average	1.04101	4.3825	52.627	F	30.3244	DZ	6.81667	TRUE	FALSE	predict479	predict4792
49.25	-0.053419	0.082936	-0.411905	2.59633	0.168056	71.9309	4.83472	High Protein	0.743935	4.42194	52.627	F	30.3244	DZ	6.9	TRUE	FALSE	predict479	predict4792
64	-0.006829	0.987103	0.154762	2.54425	0.001389	76.2801	6.33472	High Protein	0.535198	0.813056	52.627	F	30.3244	DZ	6.91667	TRUE	FALSE	predict479	predict4792
82.6667	-0.004399	0.51627	0.071429	8.98648	0.834722	78.0532	4.83472	High Fibre	0.760469	5.13972	52.627	F	30.3244	DZ	6.95	TRUE	TRUE	predict479	predict4792
79.75	0.059917	-1.2497	-0.720238	3.29366	0.001389	51.7899	7.83472	MCB	1.55232	0.325	64.6023	F	22.5229	MZ	6.23333	TRUE	FALSE	predict5144	predict51441
81	0.061737	-0.783036	-0.753571	4.57882	0.668056	54.869	7.83472	High Carb	1.49627	0.355833	64.6023	F	22.5229	MZ	6.2	TRUE	FALSE	predict5144	predict51441
87.5	-0.103253	1.69196	0.846429	5.22431	0.001389	57.7254	8.16806	High Carb	2.1182	0.186111	64.6023	F	22.5229	MZ	6.15	TRUE	TRUE	predict5144	predict51441
55	-0.151548	2.34752	2.19643	4.82958	3.83472	55.9849	8.16806	OGTT	2.03971	-2.2875	64.6023	F	22.5229	MZ	6.11667	TRUE	TRUE	predict5144	predict51441
77.6667	0.01738	2.26141	1.2131	2.5096	1.16806	46.1086	9.33472	OGTT	2.27712	-1.90972	64.6023	F	22.5229	MZ	6.08333	TRUE	FALSE	predict5144	predict51441
93.3333	0.042625	0.957242	0.496429	2.19575	0.001389	50.7065	9.16806	UK Average	1.31625	0.640556	64.6023	F	22.5229	MZ	6.05	TRUE	FALSE	predict5144	predict51441
91.5	-0.078645	0.061409	0.679762	3.61315	0.001389	47.6876	10.3347	High Fibre	1.43666	0.741667	64.6023	F	22.5229	MZ	5.98333	TRUE	FALSE	predict5144	predict51441
82	-0.045296	-1.15248	-0.520238	3.8584	0.001389	67.8691	8.00139	High Protein	1.45222	0.358333	64.6023	F	22.5229	MZ	5.95	TRUE	FALSE	predict5144	predict51441
82.75	0.051489	-0.530258	-0.603571	3.28777	1.33472	75.5769	7.83472	High Fat	1.2635	0.163889	64.6023	F	22.5229	MZ	5.9	TRUE	TRUE	predict5144	predict51441
86.25	-0.019218	-0.234326	0.413095	2.39033	2.33472	52.7982	8.83472	MCB	0.884896	1.07972	64.6023	F	24.7503	MZ	6.23333	TRUE	FALSE	predict5144	predict51442
84.5	0.025017	-0.623215	-0.503571	1.88868	1.33472	79.1955	8.83472	High Carb	1.12795	0.673889	64.6023	F	24.7503	MZ	6.2	TRUE	FALSE	predict5144	predict51442
86.5	0.029457	0.893452	0.963095	4.4382	1.83472	59.574	6.50139	High Carb	1.24946	-0.4175	64.6023	F	24.7503	MZ	6.15	TRUE	TRUE	predict5144	predict51442
85.3333	-0.008956	0.729563	0.013095	2.49357	0.501389	48.3106	8.00139	UK Average	1.3574	0.0555556	64.6023	F	24.7503	MZ	6.11667	TRUE	TRUE	predict5144	predict51442
56	-0.03344	1.59206	1.27976	3.04375	0.001389	58.2414	7.33472	OGTT	1.92648	-1.96556	64.6023	F	24.7503	MZ	6.08333	TRUE	FALSE	predict5144	predict51442
54	-0.063407	1.28234	1.24643	2.81705	0.501389	64.9776	8.83472	OGTT	1.96413	-1.91194	64.6023	F	24.7503	MZ	6.05	TRUE	FALSE	predict5144	predict51442
79.3333	0.017015	-0.975992	-0.820238	5.17091	0.501389	65.8502	9.00139	UK Average	1.37618	0.835278	64.6023	F	24.7503	MZ	6.01667	TRUE	FALSE	predict5144	predict51442
80	0.042107	-1.27599	-0.753571	3.49769	0.001389	66.0127	6.83472	High Fibre	1.29647	0.785833	64.6023	F	24.7503	MZ	5.98333	TRUE	FALSE	predict5144	predict51442
83.25	0.03272	-0.714881	-0.786905	2.65208	0.168056	53.1489	8.00139	High Protein	1.42196	0.713611	64.6023	F	24.7503	MZ	5.95	TRUE	FALSE	predict5144	predict51442
76.75	-0.000447	0.022619	0.329762	3.31475	2.33472	80.8243	8.00139	High Fat	0.933225	0.178333	64.6023	F	24.7503	MZ	5.9	TRUE	TRUE	predict5144	predict51442
94.5	0.066084	-0.233432	-0.719048	5.80575	0.168056	44.7296	8.50139	High Fat	0.849327	1.19583	65.0897	F	33.1169	DZ	7.28333	FALSE	FALSE	predict5224	predict52241
73.3333	0.008463	-1.63065	-1.00238	7.86961	1.50139	39.0207	10.5014	High Carb	1.15716	0.619444	65.0897	F	33.1169	DZ	7.31667	FALSE	FALSE	predict5224	predict52241
80.5	0.054829	-1.85288	3.88095	2.5068	3.66806	48.2069	9.16806	High Carb	1.11375	0.575	65.0897	F	33.1169	DZ	7.35	FALSE	TRUE	predict5224	predict52241
73	0.039657	-0.23621	-0.469048	4.34172	0.834722	33.6008	9.66806	UK Average	0.926521	1.04583	65.0897	F	33.1169	DZ	7.4	FALSE	FALSE	predict5224	predict52241
77.75	-0.017512	1.44712	-0.319048	2.99444	1.33472	44.7177	7.50139	UK Average	1.07807	1.61833	65.0897	F	33.1169	DZ	7.43333	FALSE	FALSE	predict5224	predict52241
63.6667	-0.031733	2.51657	1.51429	3.90957	1.83472	38.945	10.1681	OGTT	1.32217	-2.19	65.0897	F	33.1169	DZ	7.46667	FALSE	FALSE	predict5224	predict52241
99	-0.09509	-3.8876	-5.01905	1.48664	0.334722	33.5917	9.00139	High Protein	0.769696	6.64306	65.0897	F	33.1169	DZ	7.6	FALSE	FALSE	predict5224	predict52241
91.3333	0.04646	-0.563493	-0.036905	1.54358	1.00139	51.6808	7.33472	High Fat	0.889733	0.758611	65.0897	F	28.7409	DZ	7.28333	FALSE	FALSE	predict5224	predict52242
85	-0.094556	1.50873	-0.336905	4.46149	0.834722	36.8442	6.83472	High Carb	1.15135	2.10056	65.0897	F	28.7409	DZ	7.31667	FALSE	FALSE	predict5224	predict52242
91.5	-0.002848	0.292063	-0.053571	5.36364	0.001389	45.6066	6.50139	High Carb	0.941172	1.28861	65.0897	F	28.7409	DZ	7.35	FALSE	TRUE	predict5224	predict52242
84.3333	-0.018847	-1.24127	-1.22024	7.77011	0.168056	46.8205	8.50139	UK Average	1.14446	3.53583	65.0897	F	28.7409	DZ	7.38333	FALSE	TRUE	predict5224	predict52242
79	0.057922	-0.659326	-0.053571	5.44792	2.16806	37.6048	7.66806	UK Average	1.07158	2.03306	65.0897	F	28.7409	DZ	7.4	FALSE	FALSE	predict5224	predict52242
82.25	0.00707	-0.721826	-0.136905	6.54414	0.501389	43.5205	8.50139	OGTT	1.49031	1.20611	65.0897	F	28.7409	DZ	7.43333	FALSE	FALSE	predict5224	predict52242
70.5	0.056901	0.53373	0.413095	5.99155	2.16806	23.9593	10.6681	OGTT	1.32273	0.398333	65.0897	F	28.7409	DZ	7.46667	FALSE	FALSE	predict5224	predict52242
81.5	0.009155	-0.382937	-0.670238	3.37596	1.00139	43.6416	10.6681	High Protein	0.817007	0.905833	65.0897	F	28.7409	DZ	7.48333	FALSE	FALSE	predict5224	predict52242
77	-0.028777	0.472619	0.263095	1.81273	2.00139	48.1737	8.16806	High Fibre	0.983822	2.55472	65.0897	F	28.7409	DZ	7.51667	FALSE	FALSE	predict5224	predict52242
67.75	0.018031	-0.507937	-0.370238	2.86003	1.66806	54.1652	8.66806	High Protein	0.953172	1.60361	65.0897	F	28.7409	DZ	7.53333	FALSE	TRUE	predict5224	predict52242
65.5	0.009048	-0.769742	-0.861905	4.6294	0.168056	43.2319	7.66806	High Fat	0.64172	3.29333	56.8323	F	44.0598	DZ	7.05	TRUE	FALSE	predict5243	predict52431
65.25	0.002592	0.521924	-0.828571	3.4712	0.668056	41.6748	5.83472	High Carb	0.95034	3.25583	56.8323	F	44.0598	DZ	7.08333	TRUE	FALSE	predict5243	predict52431
66.3333	0.023536	-0.804465	-0.861905	3.84329	0.668056	47.2298	8.16806	High Carb	0.867016	3.28472	56.8323	F	44.0598	DZ	7.11667	TRUE	FALSE	predict5243	predict52431
79.75	-0.002564	0.52748	0.171429	7.08298	1.83472	43.5614	6.16806	UK Average	0.399719	2.25444	56.8323	F	44.0598	DZ	7.13333	TRUE	TRUE	predict5243	predict52431
75.6667	-0.013186	2.20665	1.53809	5.08027	3.00139	45.1055	7.00139	UK Average	0.5335	0.895833	56.8323	F	44.0598	DZ	7.16667	TRUE	TRUE	predict5243	predict52431
68.5	0.003465	-0.173909	-0.845238	3.18253	0.668056	46.5189	8.16806	OGTT	1.20446	3.27222	56.8323	F	44.0598	DZ	7.2	TRUE	FALSE	predict5243	predict52431
72.75	-0.00438	-0.944742	-0.845238	3.97527	0.668056	37.059	10.6681	OGTT	1.14792	3.27361	56.8323	F	44.0598	DZ	7.21667	TRUE	FALSE	predict5243	predict52431
67.75	-0.016836	-0.929465	-0.995238	2.45747	0.501389	34.0658	7.00139	High Protein	0.42732	3.46278	56.8323	F	44.0598	DZ	7.25	TRUE	FALSE	predict5243	predict52431
68	-0.006796	-0.798909	-0.828571	3.53913	0.668056	42.9471	7.33472	High Fibre	0.899184	3.24167	56.8323	F	44.0598	DZ	7.28333	TRUE	FALSE	predict5243	predict52431
70.25	0.012872	-0.955854	-0.828571	5.71762	0.668056	36.161	6.16806	High Protein	0.614303	3.325	56.8323	F	44.0598	DZ	7.3	TRUE	FALSE	predict5243	predict52431
71.6667	-0.031976	-0.237698	-0.846429	3.08452	0.834722	35.398	12.6681	High Fat	0.381519	2.20167	56.8323	F	30.2424	DZ	7.05	TRUE	FALSE	predict5243	predict52432
64	-0.005559	-0.394642	-0.729762	3.73304	0.001389	29.9359	6.83472	High Carb	0.933863	0.898611	56.8323	F	30.2424	DZ	7.08333	TRUE	FALSE	predict5243	predict52432
57.3333	0.03567	-1.0877	-1.09643	3.30468	1.50139	86.3766	10.8347	High Carb	1.13491	1.14167	56.8323	F	30.2424	DZ	7.11667	TRUE	FALSE	predict5243	predict52432
58.5	0.025553	-0.527976	-0.096429	3.00973	2.33472	33.5472	6.66806	UK Average	0.808889	1.66111	56.8323	F	30.2424	DZ	7.13333	TRUE	TRUE	predict5243	predict52432
79.75	0.046778	0.695635	1.17024	5.0606	4.83472	37.3758	9.00139	OGTT	1.33981	1.27917	56.8323	F	30.2424	DZ	7.16667	TRUE	TRUE	predict5243	predict52432
76.25	-0.018279	-0.415476	-1.0131	2.04993	1.50139	36.9036	11.8347	OGTT	0.700014	1.62944	56.8323	F	30.2424	DZ	7.2	TRUE	FALSE	predict5243	predict52432
51.3333	0.025266	-1.00992	-1.07976	3.97541	0.001389	33.245	6.66806	UK Average	0.872926	1.12111	56.8323	F	30.2424	DZ	7.21667	TRUE	FALSE	predict5243	predict52432
65.5	-0.008856	0.159524	-0.646429	2.1492	0.001389	28.2261	6.66806	High Protein	0.508793	0.685	56.8323	F	30.2424	DZ	7.25	TRUE	FALSE	predict5243	predict52432
58.5	0.021053	-0.851587	-0.829762	2.60291	0.001389	29.8641	7.00139	High Protein	0.657506	0.769444	56.8323	F	30.2424	DZ	7.28333	TRUE	FALSE	predict5243	predict52432
52	-0.023935	-0.450198	-0.796429	0.964191	1.50139	88.0491	11.6681	High Fibre	0.969828	0.898889	56.8323	F	30.2424	DZ	7.3	TRUE	FALSE	predict5243	predict52432
81	0.016803	0.127381	0.071429	2.27298	0.334722	24.3117	8.66806	High Fat	0.883522	0.407222	65.9165	F	29.0956	DZ	6.95	FALSE	TRUE	predict5284	predict52841
37	-0.043741	-1.9629	-0.795238	2.03008	2.00139	26.0933	10.0014	High Carb	1.79984	0.936389	65.9165	F	29.0956	DZ	6.96667	FALSE	TRUE	predict5284	predict52841
73.3333	-0.006257	0.835714	0.321429	3.83676	3.33472	21.3467	7.50139	High Carb	1.82902	1.34444	65.9165	F	29.0956	DZ	7	FALSE	FALSE	predict5284	predict52841
74.5	0.01144	-0.478175	-0.678571	2.11879	1.83472	25.1479	8.33472	UK Average	1.47762	1.05417	65.9165	F	29.0956	DZ	7.03333	FALSE	FALSE	predict5284	predict52841
59	0.0192	0.62877	0.921429	2.70424	3.50139	25.3924	7.16806	OGTT	1.95127	0.2	65.9165	F	29.0956	DZ	7.06667	FALSE	FALSE	predict5284	predict52841
65	0.038958	0.499603	-0.328571	5.1631	3.16806	23.4612	8.33472	UK Average	1.54417	1.11111	65.9165	F	29.0956	DZ	7.08333	FALSE	FALSE	predict5284	predict52841
68	0.045946	0.034325	0.138095	3.39004	2.33472	25.1103	9.66806	OGTT	1.88304	0.986111	65.9165	F	29.0956	DZ	7.11667	FALSE	FALSE	predict5284	predict52841
67.5	-0.036559	-1.37123	-0.395238	2.88328	1.50139	22.8992	8.50139	High Fibre	1.67267	1.3625	65.9165	F	29.0956	DZ	7.15	FALSE	TRUE	predict5284	predict52841
73.6667	-0.012386	0.264881	0.204762	4.48386	2.66806	25.3262	8.83472	High Protein	1.16983	0.671111	65.9165	F	29.0956	DZ	7.18333	FALSE	TRUE	predict5284	predict52841
73	0.006292	0.394048	0.438095	2.66543	0.501389	21.5974	8.00139	High Protein	1.39443	1.10833	65.9165	F	29.0956	DZ	7.2	FALSE	FALSE	predict5284	predict52841
49	0.047595	1.10863	1.92143	3.94	0.168056	35.551	9.50139	High Fat	0.65312	0.365556	65.4292	F	27.8656	DZ	7.85	FALSE	FALSE	predict5343	predict53431
79	-0.037175	1.35308	1.50476	5.93899	0.168056	37.3444	9.50139	High Carb	0.896017	1.45	65.4292	F	27.8656	DZ	7.86667	FALSE	TRUE	predict5343	predict53431
96.3333	-0.000683	-4.09553	-4.19524	5.58769	1.16806	35.7858	9.00139	High Carb	0.830161	8.24861	65.4292	F	27.8656	DZ	7.88333	FALSE	TRUE	predict5343	predict53431
85	-0.055553	3.17391	1.43809	3.62209	3.00139	48.1291	9.33472	OGTT	0.626821	0.691944	65.4292	F	27.8656	DZ	7.9	FALSE	FALSE	predict5343	predict53431
97	0.076223	-2.09137	-0.711905	3.51574	0.168056	44.8979	8.83472	UK Average	0.925375	6.28611	65.4292	F	27.8656	DZ	7.91667	FALSE	FALSE	predict5343	predict53431
94	0.00665	-0.131646	1.20476	4.29159	-5.16528	35.5846	8.83472	UK Average	0.919294	3.575	65.4292	F	27.8656	DZ	7.93333	FALSE	FALSE	predict5343	predict53431
94.3333	-0.071776	5.14474	1.73809	4.00985	0.668056	27.5703	8.00139	OGTT	0.65608	0.605833	65.4292	F	27.8656	DZ	7.95	FALSE	FALSE	predict5343	predict53431
100	0.017637	-3.48304	-2.97857	6.02444	2.50139	52.4076	8.66806	High Protein	0.462117	6.73639	65.4292	F	27.8656	DZ	7.96667	FALSE	FALSE	predict5343	predict53431
96	0.041395	-2.20526	-2.62857	3.90811	4.16806	33.2535	9.66806	High Protein	0.459186	7.54444	65.4292	F	27.8656	DZ	7.98333	FALSE	TRUE	predict5343	predict53431
97	0.031901	-1.94137	-0.195238	4.04393	1.00139	30.6631	9.66806	High Fibre	0.676186	2.58361	65.4292	F	27.8656	DZ	8	FALSE	TRUE	predict5343	predict53431
68	0.015963	-0.289186	-0.470238	3.17258	1.83472	38.6858	10.0014	High Fat	0.565915	2.48556	65.4292	F	26.1941	DZ	7.81667	FALSE	FALSE	predict5343	predict53432
98	-0.001766	0.578869	0.879762	4.14786	1.83472	38.7384	12.3347	High Carb	0.957332	1.92194	65.4292	F	26.1941	DZ	7.88333	FALSE	TRUE	predict5343	predict53432
94	0.032812	-0.539186	-0.903571	4.93805	1.83472	27.9237	12.6681	OGTT	1.39283	2.39972	65.4292	F	26.1941	DZ	7.9	FALSE	FALSE	predict5343	predict53432
94	-0.035968	-1.02669	-0.753571	3.86142	1.33472	28.0435	7.66806	UK Average	1.04606	2.2975	65.4292	F	26.1941	DZ	7.91667	FALSE	FALSE	predict5343	predict53432
83	-0.029312	-1.04058	-1.08691	5.3546	2.16806	29.8076	10.8347	OGTT	1.31858	2.63611	65.4292	F	26.1941	DZ	7.93333	FALSE	FALSE	predict5343	predict53432
88	-0.016435	-1.22669	-0.386905	1.93154	1.33472	45.0842	13.8347	UK Average	1.00205	3.01694	65.4292	F	26.1941	DZ	7.95	FALSE	FALSE	predict5343	predict53432
89	-0.036692	-0.515575	-0.320238	3.20945	4.00139	97.864	8.50139	High Protein	0.651094	5.93722	65.4292	F	26.1941	DZ	7.98333	FALSE	TRUE	predict5343	predict53432
80	0.020399	1.91637	0.496429	3.48793	1.16806	28.7528	9.33472	High Protein	0.740805	2.85056	65.4292	F	26.1941	DZ	8	FALSE	TRUE	predict5343	predict53432
96	0.032325	-2.68869	-0.963095	2.68137	0.001389	55.4324	8.33472	High Fat	0.688589	2.84917	58.3546	F	25.5841	DZ	7.28333	TRUE	FALSE	predict5381	predict53812
63	0.01679	-2.7123	0.353571	2.16164	0.668056	56.2089	8.16806	OGTT	1.00632	1.42056	58.3546	F	25.5841	DZ	7.38333	TRUE	FALSE	predict5381	predict53812
97	0.010973	2.30298	1.40357	2.35814	0.001389	46.8592	8.66806	OGTT	1.1271	0.229722	58.3546	F	25.5841	DZ	7.41667	TRUE	FALSE	predict5381	predict53812
96.25	0.024926	-2.5623	-1.61309	2.31666	1.16806	43.6521	8.66806	UK Average	0.99239	3.08972	58.3546	F	25.5841	DZ	7.45	TRUE	FALSE	predict5381	predict53812
93	0.03352	1.28909	0.036905	3.82865	0.501389	35.3831	8.33472	High Protein	0.674876	1.73528	58.3546	F	25.5841	DZ	7.48333	TRUE	FALSE	predict5381	predict53812
99.6667	-0.146651	-0.060912	1.02024	4.73333	3.00139	46.3097	9.50139	High Protein	0.970815	0.154167	58.3546	F	25.5841	DZ	7.5	TRUE	FALSE	predict5381	predict53812
98	0.030997	0.471032	-0.063095	2.5459	1.00139	39.2331	9.00139	High Fibre	1.36914	1.81472	58.3546	F	25.5841	DZ	7.53333	TRUE	TRUE	predict5381	predict53812
62	0.010466	-0.02371	-0.427381	2.44168	1.50139	30.945	7.83472	MCB	0.577024	1.52694	58.1985	F	18.3559	DZ	7.26667	FALSE	FALSE	predict5399	predict53992
51.3333	-0.026447	-0.325099	0.305952	2.70109	0.001389	29.1932	9.66806	High Carb	1.0621	0.565	58.1985	F	18.3559	DZ	7.23333	FALSE	FALSE	predict5399	predict53992
64	0.032281	-0.320932	-0.744048	0.984493	1.16806	30.0864	7.33472	High Carb	1.05335	1.5775	58.1985	F	18.3559	DZ	7.2	FALSE	TRUE	predict5399	predict53992
51	0.022545	-1.95704	-1.37738	1.84004	0.001389	29.9192	8.83472	UK Average	0.967885	2.18222	58.1985	F	18.3559	DZ	7.16667	FALSE	TRUE	predict5399	predict53992
40.5	0.038834	0.70129	0.489286	1.89755	0.501389	41.7732	9.50139	OGTT	1.32629	0.313056	58.1985	F	18.3559	DZ	7.13333	FALSE	FALSE	predict5399	predict53992
59.5	0.04149	0.497124	0.005952	1.00127	0.001389	30.181	9.16806	UK Average	1.08786	0.797778	58.1985	F	18.3559	DZ	7.1	FALSE	FALSE	predict5399	predict53992
41	-0.041446	0.873512	0.555952	3.08053	0.001389	36.1798	7.33472	OGTT	1.08644	-1.99472	58.1985	F	18.3559	DZ	7.06667	FALSE	FALSE	predict5399	predict53992
69.5	-0.100969	0.036012	0.389286	0.831521	0.001389	30.142	8.33472	High Protein	0.848058	0.408611	58.1985	F	18.3559	DZ	6.96667	FALSE	TRUE	predict5399	predict53992
99.6667	-0.008528	-1.05238	0.021429	1.29113	1.33472	37.7125	7.83472	High Fat	0.651488	0.901389	65.3525	F	24.5842	DZ	8.05	FALSE	FALSE	predict5407	predict54071
96.25	0.022679	0.992063	0.271429	1.421	2.00139	59.4341	8.66806	MCB	0.999082	0.334722	65.3525	F	24.5842	DZ	8.03333	FALSE	FALSE	predict5407	predict54071
97.3333	-0.028584	-0.037103	-0.445238	1.53406	1.50139	31.8215	7.16806	High Carb	1.01545	1.10972	65.3525	F	24.5842	DZ	8.03333	FALSE	FALSE	predict5407	predict54071
99	-0.002046	0.49623	-0.961905	1.25953	0.834722	64.1379	7.50139	High Carb	0.918419	0.3375	65.3525	F	24.5842	DZ	8.01667	FALSE	TRUE	predict5407	predict54071
97	0.017338	0.230952	-0.095238	2.93407	0.668056	31.8412	12.1681	OGTT	0.820662	0.580833	65.3525	F	24.5842	DZ	8	FALSE	TRUE	predict5407	predict54071
96	0.004445	-0.994048	0.221429	2.65475	1.16806	34.6263	10.0014	UK Average	0.754514	0.248611	65.3525	F	24.5842	DZ	8	FALSE	FALSE	predict5407	predict54071
94.25	0.022477	-0.323215	-0.411905	2.95222	1.50139	32.8837	9.33472	OGTT	0.86367	0.425	65.3525	F	24.5842	DZ	7.98333	FALSE	FALSE	predict5407	predict54071
95.2	-0.006755	-0.410715	-0.528571	2.3645	1.50139	58.2659	9.33472	UK Average	0.909976	0.476667	65.3525	F	24.5842	DZ	7.96667	FALSE	FALSE	predict5407	predict54071
100	-0.007805	-1.00516	0.371429	2.10716	0.168056	58.2226	8.33472	High Fibre	0.794833	0.298611	65.3525	F	24.5842	DZ	7.95	FALSE	FALSE	predict5407	predict54071
97.3333	-0.012073	-0.077381	-0.161905	2.20472	2.00139	65.4693	8.66806	High Fat	0.94081	0.270833	65.3525	F	24.5842	DZ	7.93333	FALSE	FALSE	predict5407	predict54071
97	0.013001	-0.214881	-0.728571	1.80397	1.33472	58.9214	8.83472	High Protein	0.538463	1.04583	65.3525	F	24.5842	DZ	7.91667	FALSE	TRUE	predict5407	predict54071
73.75	0.006713	-0.93373	-0.503571	4.2907	0.834722	34.2011	8.83472	MCB	0.601803	0.650833	65.3525	F	32.1335	DZ	8.03333	FALSE	FALSE	predict5407	predict54072
86.5	0.035502	-1.59067	-0.870238	4.72324	1.83472	55.5608	8.33472	High Carb	0.958258	0.510556	65.3525	F	32.1335	DZ	8.03333	FALSE	FALSE	predict5407	predict54072
83.5	-0.014382	0.107937	-0.320238	1.19361	3.00139	40.3356	7.66806	High Carb	0.946726	0.305278	65.3525	F	32.1335	DZ	8.01667	FALSE	TRUE	predict5407	predict54072
54.75	-0.008017	0.934326	0.213095	4.16459	0.001389	42.7944	8.00139	OGTT	1.37947	0.794444	65.3525	F	32.1335	DZ	8	FALSE	TRUE	predict5407	predict54072
69	0.028292	0.584326	0.079762	3.10679	3.33472	30.8513	8.50139	UK Average	1.03799	-0.594722	65.3525	F	32.1335	DZ	8	FALSE	FALSE	predict5407	predict54072
56.5	-0.007946	0.664881	0.579762	2.55049	4.00139	35.3975	8.33472	OGTT	1.24263	-0.521667	65.3525	F	32.1335	DZ	7.98333	FALSE	FALSE	predict5407	predict54072
41	-0.020381	-0.280952	-0.753571	5.83904	2.33472	33.535	9.50139	UK Average	0.976378	0.161667	65.3525	F	32.1335	DZ	7.96667	FALSE	FALSE	predict5407	predict54072
76	-0.001104	-0.500893	0.497619	2.08991	2.16806	21.2666	8.83472	High Fat	0.596534	0.938333	64.8268	F	32.8768	MZ	7.71667	FALSE	FALSE	predict5408	predict54081
80.3333	0.034298	-0.348115	-0.585714	3.78772	1.16806	30.5678	8.83472	MCB	0.635068	1.95944	64.8268	F	32.8768	MZ	7.7	FALSE	FALSE	predict5408	predict54081
59.25	-0.012832	-1.24395	-0.119048	5.82651	1.83472	26.3954	9.00139	High Carb	0.850468	1.58472	64.8268	F	32.8768	MZ	7.66667	FALSE	FALSE	predict5408	predict54081
67.25	-0.045263	-0.588393	-0.819048	2.77752	3.50139	35.5309	7.16806	High Carb	0.957022	2.185	64.8268	F	32.8768	MZ	7.65	FALSE	FALSE	predict5408	predict54081
85.75	0.077261	0.879662	0.814286	2.84281	2.66806	34.1922	8.50139	UK Average	0.67059	0.551944	64.8268	F	32.8768	MZ	7.61667	FALSE	TRUE	predict5408	predict54081
57.5	0.015153	0.300496	-0.369048	1.55346	1.83472	30.161	7.66806	OGTT	0.703487	1.70806	64.8268	F	32.8768	MZ	7.58333	FALSE	TRUE	predict5408	predict54081
72.75	0.031274	1.34077	0.147619	3.70014	1.00139	33.3606	10.8347	OGTT	1.0253	1.17694	64.8268	F	32.8768	MZ	7.56667	FALSE	FALSE	predict5408	predict54081
72.5	-0.008895	-1.79117	-2.00238	3.71378	1.00139	36.664	8.66806	UK Average	0.633945	3.32694	64.8268	F	32.8768	MZ	7.53333	FALSE	FALSE	predict5408	predict54081
70.5	-0.016989	-4.45645	-0.019048	2.89956	0.001389	36.9277	8.50139	High Protein	0.295447	1.33722	64.8268	F	32.8768	MZ	7.5	FALSE	FALSE	predict5408	predict54081
72.5	-0.029783	0.303273	-0.869048	3.33799	1.50139	32.4869	8.16806	High Fibre	0.673496	2.14472	64.8268	F	32.8768	MZ	7.48333	FALSE	FALSE	predict5408	predict54081
64	0.008076	0.226885	-0.452381	3.19108	3.50139	34.9463	8.16806	High Fat	0.487877	1.78194	64.8268	F	32.8768	MZ	7.45	FALSE	FALSE	predict5408	predict54081
72.5	0.037937	-0.424603	0.908333	2.9229	2.16806	45.8838	8.66806	High Fat	0.800763	0.513056	64.8268	F	29.632	MZ	7.71667	FALSE	FALSE	predict5408	predict54082
53	-0.002688	-0.562103	-0.141667	2.56358	1.16806	35.078	7.50139	MCB	0.631507	1.24306	64.8268	F	29.632	MZ	7.7	FALSE	FALSE	predict5408	predict54082
31.25	-0.029602	0.993453	0.191667	2.91973	0.001389	36.9009	7.16806	High Carb	0.703089	0.928333	64.8268	F	29.632	MZ	7.66667	FALSE	FALSE	predict5408	predict54082
57.6667	-0.020226	1.12956	0.675	1.66712	2.83472	28.5949	8.33472	High Carb	0.807727	0.4275	64.8268	F	29.632	MZ	7.65	FALSE	FALSE	predict5408	predict54082
42	-0.064929	1.03234	0.925	2.0811	0.501389	38.4798	9.16806	UK Average	0.705194	0.176667	64.8268	F	29.632	MZ	7.61667	FALSE	TRUE	predict5408	predict54082
51.75	-0.009948	1.87679	0.875	2.41367	2.16806	22.0222	8.33472	OGTT	1.00637	0.221389	64.8268	F	29.632	MZ	7.58333	FALSE	TRUE	predict5408	predict54082
56.6667	0.028047	-2.06071	-2.99167	1.89482	0.668056	26.1102	9.33472	OGTT	1.15334	4.09472	64.8268	F	29.632	MZ	7.56667	FALSE	FALSE	predict5408	predict54082
76.5	-0.008659	-0.466269	0.675	2.23682	2.83472	43.0032	7.50139	UK Average	0.859479	0.432778	64.8268	F	29.632	MZ	7.53333	FALSE	FALSE	predict5408	predict54082
58	-0.001218	1.34901	0.441667	2.8533	0.001389	23.4185	8.50139	High Fat	0.620757	0.659444	64.8268	F	29.632	MZ	7.5	FALSE	FALSE	predict5408	predict54082
39	0.003521	-3.23988	-2.30833	1.9549	0.001389	32.8405	10.1681	High Fibre	0.74753	3.42611	64.8268	F	29.632	MZ	7.48333	FALSE	FALSE	predict5408	predict54082
50	0.030771	1.76151	0.925	2.27061	0.001389	33.0218	9.00139	High Protein	0.406108	0.185556	64.8268	F	29.632	MZ	7.45	FALSE	FALSE	predict5408	predict54082
88.1429	-0.066209	1.25585	0.354762	3.45849	1.33472	44.0162	9.16806	High Fat	0.978451	2.46833	54.2204	F	29.7438	DZ	5.96667	TRUE	FALSE	predict5418	predict54182
79.75	0.041126	-2.16776	0.854762	3.41608	3.50139	49.8149	9.33472	UK Average	1.12118	2.50944	54.2204	F	29.7438	DZ	5.98333	TRUE	FALSE	predict5418	predict54182
45.75	0.10169	-1.91359	1.02143	4.05115	2.00139	83.3998	9.66806	UK Average	0.986853	0.369444	54.2204	F	29.7438	DZ	6.01667	TRUE	TRUE	predict5418	predict54182
44	-0.040846	-0.399702	-0.395238	2.30849	0.168056	43.4462	9.33472	OGTT	1.57057	0.257222	54.2204	F	29.7438	DZ	6.05	TRUE	TRUE	predict5418	predict54182
82.6667	0.046973	2.01835	0.554762	1.79891	0.001389	48.3694	8.50139	High Carb	0.843993	0.629722	54.2204	F	29.7438	DZ	6.06667	TRUE	FALSE	predict5418	predict54182
42.3333	0.080035	-0.76498	-2.67857	2.67559	2.16806	67.7269	8.83472	OGTT	1.55543	0.250833	54.2204	F	29.7438	DZ	6.1	TRUE	FALSE	predict5418	predict54182
80.25	0.058441	-1.48442	-0.311905	2.30319	0.168056	50.1375	9.50139	High Carb	1.35808	0.525278	54.2204	F	29.7438	DZ	6.11667	TRUE	FALSE	predict5418	predict54182
58.25	-0.070285	2.65556	0.421429	4.6239	2.00139	43.3085	7.50139	High Fat	0.706985	0.518056	64.9309	F	30.6299	DZ	7.35	FALSE	TRUE	predict5508	predict55081
55	-0.031544	-0.195833	-0.028571	3.80315	1.33472	45.1501	7.00139	High Carb	0.997735	1.98056	64.9309	F	30.6299	DZ	7.38333	FALSE	TRUE	predict5508	predict55081
43.3333	0.030436	-0.188889	-0.045238	5.02865	0.001389	46.512	8.16806	High Carb	0.699144	0.587778	64.9309	F	30.6299	DZ	7.4	FALSE	FALSE	predict5508	predict55081
36.75	-0.000923	-0.111111	-0.428571	2.22863	1.00139	46.3026	6.83472	OGTT	0.889055	1.90139	64.9309	F	30.6299	DZ	7.43333	FALSE	FALSE	predict5508	predict55081
51.3333	0.032671	0.701389	-0.028571	3.72807	0.001389	37.9157	7.16806	UK Average	0.571651	1.43056	64.9309	F	30.6299	DZ	7.46667	FALSE	FALSE	predict5508	predict55081
46.3333	-0.017865	-1.80972	0.388095	5.23613	0.501389	43.5904	7.00139	OGTT	0.935398	0.805556	64.9309	F	30.6299	DZ	7.48333	FALSE	FALSE	predict5508	predict55081
50	-0.014553	-1.12639	-1.74524	4.9749	0.001389	38.6165	8.00139	UK Average	0.883939	1.70444	64.9309	F	30.6299	DZ	7.51667	FALSE	FALSE	predict5508	predict55081
47	-0.021958	3.11806	1.1381	1.49271	2.66806	42.3018	7.00139	High Protein	0.313126	0.965278	64.9309	F	30.6299	DZ	7.53333	FALSE	TRUE	predict5508	predict55081
52	-0.01501	-1.6125	-2.94524	4.08291	0.668056	25.972	7.66806	High Protein	0.765385	5.1475	64.9309	F	30.6299	DZ	7.56667	FALSE	TRUE	predict5508	predict55081
32	0.053603	1.64861	1.45476	2.63999	1.33472	37.7894	8.50139	High Fibre	0.927449	0.775	64.9309	F	30.6299	DZ	7.6	FALSE	FALSE	predict5508	predict55081
66.5	-0.060241	-1.64028	-0.810606	2.86833	1.50139	39.2705	6.33472	MCB	0.551644	1.08639	46.3354	F	36.014	DZ	6.45	TRUE	FALSE	predict5595	predict55951
62.3333	-0.052529	-0.555556	-0.293939	6.26023	0.001389	36.1914	8.00139	High Carb	0.837173	1.54667	46.3354	F	36.014	DZ	6.41667	TRUE	TRUE	predict5595	predict55951
62.6667	-0.015194	0.020833	0.139394	6.76725	1.33472	45.3216	6.66806	High Carb	0.986922	0.546667	46.3354	F	36.014	DZ	6.38333	TRUE	TRUE	predict5595	predict55951
62.3333	-0.01071	-0.009722	-0.243939	4.89856	0.668056	34.7991	11.3347	OGTT	1.18991	0.281667	46.3354	F	36.014	DZ	6.33333	TRUE	FALSE	predict5595	predict55951
61	0.004283	-0.3125	-0.327273	8.81813	1.83472	32.1374	6.66806	UK Average	0.662222	0.619444	46.3354	F	36.014	DZ	6.3	TRUE	FALSE	predict5595	predict55951
71.5	0.081827	0.393055	0.072727	5.98152	0.333333	43.3089	6.83472	UK Average	0.661283	0.711389	46.3354	F	36.014	DZ	6.26667	TRUE	FALSE	predict5595	predict55951
72	0.072669	0.048611	0.889394	2.35676	0.168056	53.8322	6.33472	High Fat	0.229968	0.704167	46.3354	F	36.014	DZ	6.15	TRUE	TRUE	predict5595	predict55951
62	0.010842	0.720833	0.039394	4.41798	1.66806	50.8238	7.83472	High Protein	0.818987	0.763056	46.3354	F	36.014	DZ	6.11667	TRUE	TRUE	predict5595	predict55951
51.25	0.080914	-3.58125	-0.086905	11.4715	1.16806	48.5363	6.83472	MCB	0.84854	2.07389	46.3354	F	28.5399	DZ	6.45	TRUE	FALSE	predict5595	predict55952
69.6667	-0.041859	1.82014	1.59643	3.08144	1.33472	58.3636	7.83472	UK Average	1.23902	-1.02222	46.3354	F	28.5399	DZ	6.33333	TRUE	FALSE	predict5595	predict55952
53	0.02511	0.995139	0.346429	3.75485	0.334722	54.1586	11.8347	OGTT	0.935373	0.0902778	46.3354	F	28.5399	DZ	6.3	TRUE	FALSE	predict5595	predict55952
42.6	-0.04599	1.12153	-0.636905	3.64068	0.501389	47.4469	8.83472	OGTT	1.42716	0.425278	46.3354	F	28.5399	DZ	6.26667	TRUE	FALSE	predict5595	predict55952
78.5	-0.03033	0.022916	-0.703571	2.00091	0.334722	85.0298	9.50139	UK Average	0.907333	0.191667	46.3354	F	28.5399	DZ	6.23333	TRUE	FALSE	predict5595	predict55952
65.3333	0.008918	-0.897917	0.446429	4.96687	1.50139	61.3075	7.16806	High Fibre	0.99304	0.780833	46.3354	F	28.5399	DZ	6.11667	TRUE	TRUE	predict5595	predict55952
62.5	-0.049868	-2.49979	-0.611538	3.08168	4.83472	48.5855	10.1681	High Fat	1.27454	0.727778	45.7741	M	28.8474	MZ	7.33333	TRUE	TRUE	predict5642	predict56421
63	-0.07021	-1.23451	1.72179	9.03577	2.00139	26.8698	10.1681	High Carb	1.95179	0.585	45.7741	M	28.8474	MZ	7.36667	TRUE	TRUE	predict5642	predict56421
82	-0.058973	0.989103	-0.344872	5.29124	1.00139	22.2933	8.00139	High Carb	1.66579	0.602778	45.7741	M	28.8474	MZ	7.38333	TRUE	FALSE	predict5642	predict56421
75.3333	-0.010855	2.01271	0.221795	7.27503	1.33472	26.4122	12.3347	UK Average	1.91134	0.187778	45.7741	M	28.8474	MZ	7.41667	TRUE	FALSE	predict5642	predict56421
42.5	0.038662	-3.65951	-1.7282	2.82483	1.00139	15.9934	6.83472	OGTT	2.20614	0.136389	45.7741	M	28.8474	MZ	7.45	TRUE	FALSE	predict5642	predict56421
83.5	0.05591	0.501603	-1.21154	3.1008	3.83472	26.7538	11.6681	UK Average	1.42614	1.3725	45.7741	M	28.8474	MZ	7.48333	TRUE	FALSE	predict5642	predict56421
69.75	0.02931	0.287714	0.821795	2.76881	1.50139	21.4081	12.1681	OGTT	2.0242	0.909722	45.7741	M	28.8474	MZ	7.5	TRUE	FALSE	predict5642	predict56421
66.5	0.042085	-2.29979	-1.79487	4.03489	3.50139	38.0891	6.66806	High Protein	1.39092	0.235	45.7741	M	28.8474	MZ	7.53333	TRUE	TRUE	predict5642	predict56421
92.3333	0.02562	0.354381	0.405128	1.74405	3.16806	35.1903	9.33472	High Fibre	1.32693	1.10278	45.7741	M	28.8474	MZ	7.56667	TRUE	TRUE	predict5642	predict56421
62.5	0.016591	0.967659	1.02619	2.72836	1.50139	31.8324	7.50139	High Carb	1.70108	0.561389	45.7714	M	27.0799	MZ	7.33333	TRUE	TRUE	predict5642	predict56422
52	-0.102663	2.59127	1.94286	3.44485	1.33472	131.954	12.3347	High Carb	1.53453	0.389167	45.7714	M	27.0799	MZ	7.36667	TRUE	TRUE	predict5642	predict56422
38	0.009425	-0.574008	-0.840476	4.86972	0.001389	33.8766	10.1681	UK Average	1.8631	0.334722	45.7714	M	27.0799	MZ	7.38333	TRUE	FALSE	predict5642	predict56422
79	0.005536	0.184326	-0.67381	5.59265	1.33472	106.763	8.50139	UK Average	1.3155	2.32944	45.7714	M	27.0799	MZ	7.45	TRUE	FALSE	predict5642	predict56422
33	0.018504	-0.301785	-0.757143	6.19842	1.50139	80.8931	11.5014	OGTT	1.89687	0.253056	45.7714	M	27.0799	MZ	7.48333	TRUE	FALSE	predict5642	predict56422
91.5	-0.002663	-1.29901	-0.657143	7.81893	0.834722	26.0474	9.33472	High Protein	0	2.5625	45.7714	M	27.0799	MZ	7.5	TRUE	FALSE	predict5642	predict56422
63	-0.022148	1.83433	1.75952	5.94127	0.001389	111.468	7.16806	High Protein	1.50001	0.507222	45.7714	M	27.0799	MZ	7.53333	TRUE	TRUE	predict5642	predict56422
14.3333	0.060917	0.546826	1.84286	2.88808	0.668056	35.7901	9.33472	High Fibre	1.68156	0.214167	45.7714	M	27.0799	MZ	7.56667	TRUE	TRUE	predict5642	predict56422
73	-0.003173	0.499504	-0.204762	2.05666	0.334722	27.8737	7.66806	MCB	1.01146	1.38333	52.4682	F	24.4126	MZ	7.03333	FALSE	FALSE	predict576	predict5761
41.3333	-0.08833	0.438393	-0.188095	3.45057	1.33472	28.8836	10.0014	High Carb	0.997654	1.36972	52.4682	F	24.4126	MZ	7	FALSE	FALSE	predict576	predict5761
54.5	-0.080833	0.789781	-0.004762	3.04009	1.66806	18.9931	6.50139	High Carb	1.29994	1.45556	52.4682	F	24.4126	MZ	6.96667	FALSE	TRUE	predict576	predict5761
70	0.024357	0.748115	-0.021429	3.63406	3.66806	13.8493	7.16806	UK Average	1.03586	1.36944	52.4682	F	24.4126	MZ	6.93333	FALSE	TRUE	predict576	predict5761
78	0.044672	-0.000496	-0.088095	2.122	0.834722	40.0493	10.0014	OGTT	1.45325	1.2625	52.4682	F	24.4126	MZ	6.9	FALSE	FALSE	predict576	predict5761
71.5	-0.020348	0.307837	-0.271429	2.66073	0.001389	33.3832	11.5014	UK Average	0.889773	1.9	52.4682	F	24.4126	MZ	6.86667	FALSE	FALSE	predict576	predict5761
73	-0.000905	-0.307441	-0.254762	2.37549	0.001389	22.838	12.3347	OGTT	1.2339	1.54028	52.4682	F	24.4126	MZ	6.83333	FALSE	FALSE	predict576	predict5761
73.6667	0.031335	0.312004	-0.188095	1.19174	0.501389	34.168	12.1681	High Fibre	1.11222	1.43778	52.4682	F	24.4126	MZ	6.8	FALSE	FALSE	predict576	predict5761
71	0.106244	-3.9505	-1.02143	4.44731	2.50139	50.6815	10.6681	High Fat	0.597962	2.44861	52.4682	F	24.4126	MZ	6.76667	FALSE	FALSE	predict576	predict5761
67	0.023683	1.43978	0.278571	2.71081	0.334722	30.2288	8.00139	High Protein	0.928465	0.886111	52.4682	F	24.4126	MZ	6.73333	FALSE	TRUE	predict576	predict5761
55.25	0.050128	-0.979167	-0.089286	5.5049	0.501389	40.3088	8.33472	High Fat	0.95754	2.24333	64.5175	F	25.1056	DZ	6.36667	TRUE	FALSE	predict5779	predict57792
68.3333	0.067931	-1.55417	-0.839286	6.02705	0.001389	35.037	8.66806	High Fat	0.940343	1.6	64.5175	F	25.1056	DZ	6.38333	TRUE	TRUE	predict5779	predict57792
57	-0.048628	0.476389	-1.30595	6.04803	1.33472	37.066	9.33472	High Carb	1.1677	1.08083	64.5175	F	25.1056	DZ	6.41667	TRUE	TRUE	predict5779	predict57792
70.3333	-0.019122	0.372222	0.027381	6.88633	1.50139	30.2044	8.33472	High Carb	1.50782	1.4375	64.5175	F	25.1056	DZ	6.45	TRUE	FALSE	predict5779	predict57792
52.5	0.018178	1.93194	-0.205952	4.70979	0.001389	21.7998	11.8347	OGTT	1.71883	1.50167	64.5175	F	25.1056	DZ	6.46667	TRUE	FALSE	predict5779	predict57792
64.5	-0.057972	3.9625	3.47738	5.1604	0.501389	27.9499	11.8347	UK Average	1.44091	-2.11389	64.5175	F	25.1056	DZ	6.5	TRUE	FALSE	predict5779	predict57792
56.3333	-0.078032	1.45	1.94405	5.58232	1.83472	37.8087	10.3347	OGTT	1.67137	-1.25833	64.5175	F	25.1056	DZ	6.51667	TRUE	FALSE	predict5779	predict57792
68.5	-0.09297	2.74444	0.310714	5.56963	2.33472	39.8184	9.66806	UK Average	1.08324	0.761111	64.5175	F	25.1056	DZ	6.55	TRUE	FALSE	predict5779	predict57792
84	0.065347	-1.3375	-0.722619	5.89733	0.168056	49.8807	8.83472	High Fibre	1.07417	2.62083	64.5175	F	25.1056	DZ	6.63333	TRUE	FALSE	predict5779	predict57792
36.6667	0.047064	-2.26419	0.254762	3.21906	3.50139	42.3266	13.8347	High Fat	0.713285	0.760556	57.6482	F	25.3804	DZ	5.78333	FALSE	FALSE	predict5831	predict58312
73.3333	0.09682	-4.54752	-3.47857	4.2003	0.501389	49.3815	8.83472	OGTT	0.883251	4.05167	57.6482	F	25.3804	DZ	6.6	TRUE	FALSE	predict5831	predict58312
76.6667	0.005351	0.284425	-0.878571	5.6772	2.00139	56.5621	8.66806	UK Average	0.629086	0.548889	57.6482	F	25.3804	DZ	6.56667	TRUE	FALSE	predict5831	predict58312
77	0.057732	2.17054	0.704762	3.44217	1.33472	28.1804	8.00139	High Protein	0.393371	0.566667	57.6482	F	25.3804	DZ	6.48333	TRUE	FALSE	predict5831	predict58312
99.25	0.021278	-0.088034	0.133333	3.04532	0.668056	48.9914	8.33472	MCB	0.718907	0.326667	48.0465	F	28.846	MZ	7.06667	FALSE	FALSE	predict5837	predict58372
100	0.006803	-0.578312	-0.816667	3.46391	1.16806	32.7049	8.33472	High Carb	0.781125	1.12222	48.0465	F	28.846	MZ	7.03333	FALSE	FALSE	predict5837	predict58372
100	-0.022584	-1.82553	-0.383333	2.27302	1.50139	32.3103	9.33472	High Carb	0.930762	0.755833	48.0465	F	28.846	MZ	7	FALSE	FALSE	predict5837	predict58372
80	0.01825	0.484188	0.6	2.59174	2.16806	44.1079	8.16806	UK Average	0.856109	0.627778	48.0465	F	28.846	MZ	6.96667	FALSE	TRUE	predict5837	predict58372
99.6667	-0.020904	-0.082478	-0.083333	3.33975	2.33472	40.3831	10.1681	OGTT	0.730898	0.616667	48.0465	F	28.846	MZ	6.93333	FALSE	TRUE	predict5837	predict58372
90	0.005873	-1.16026	-0.7	1.87098	0.668056	55.5761	8.50139	High Protein	0.38256	0.4725	48.0465	F	28.846	MZ	6.83333	FALSE	FALSE	predict5837	predict58372
97	-0.023215	-0.438034	-1	5.98379	1.50139	43.3242	9.33472	High Fibre	0.711941	0.427778	48.0465	F	28.846	MZ	6.76667	FALSE	FALSE	predict5837	predict58372
56	0.007948	-0.049107	0.844048	4.21677	0.501389	84.8886	13.8347	MCB	0.71141	0.521389	55.7728	F	20.5377	DZ	7.41667	FALSE	TRUE	predict5895	predict58951
29	-0.025249	0.503671	0.927381	3.91169	0.001389	55.1979	9.50139	High Carb	0.978356	0.475	55.7728	F	20.5377	DZ	7.4	FALSE	TRUE	predict5895	predict58951
37	0.018833	-0.900496	-1.15595	7.1329	0.834722	135.236	8.16806	High Carb	1.34217	0.378611	55.7728	F	20.5377	DZ	7.36667	FALSE	FALSE	predict5895	predict58951
34	-0.030504	-0.576885	-1.13929	6.06645	0.834722	30.2522	12.6681	UK Average	1.15049	0.348333	55.7728	F	20.5377	DZ	7.33333	FALSE	FALSE	predict5895	predict58951
55	-0.053306	-0.050496	0.027381	8.87871	1.00139	32.2513	9.83472	UK Average	1.20661	-0.848056	55.7728	F	20.5377	DZ	7.26667	FALSE	FALSE	predict5895	predict58951
43	0.030132	-0.647718	-1.07262	6.21162	0.834722	33.0574	12.8347	OGTT	1.17933	0.259444	55.7728	F	20.5377	DZ	7.23333	FALSE	FALSE	predict5895	predict58951
42	-0.047578	0.925893	1.41071	5.41462	1.83472	65.2611	6.66806	High Fibre	0.93488	0.141667	55.7728	F	20.5377	DZ	7.2	FALSE	TRUE	predict5895	predict58951
31	-0.047313	0.649504	1.49405	3.28393	0.834722	41.8029	10.1681	High Fat	0.898808	0.175	55.7728	F	20.5377	DZ	7.16667	FALSE	TRUE	predict5895	predict58951
41.5	-0.000686	-0.937996	-1.07262	8.88554	1.00139	163.101	10.0014	High Protein	1.0559	0.402222	55.7728	F	20.5377	DZ	7.13333	FALSE	FALSE	predict5895	predict58951
36.75	0.021213	-0.909226	-0.82381	3.46632	0.001389	22.5084	9.50139	OGTT	1.40307	0.789167	56.9829	F	33.7305	DZ	7.4	FALSE	FALSE	predict5899	predict58991
68	-0.065424	1.44911	1.12619	5.10824	0.168056	28.0365	9.33472	UK Average	0.97595	-0.802778	56.9829	F	33.7305	DZ	7.46667	FALSE	FALSE	predict5899	predict58991
68	-0.015625	0.418552	-0.57381	2.63108	1.16806	32.0722	12.1681	High Protein	0.749456	0.634722	56.9829	F	33.7305	DZ	7.51667	FALSE	FALSE	predict5899	predict58991
68	0.039583	-0.541072	0.136905	5.22082	1.83472	27.7468	6.83472	High Fat	0.767721	1.87889	56.9829	F	39.8236	DZ	7.28333	FALSE	FALSE	predict5899	predict58992
46.6667	-0.010138	1.87004	-1.27976	4.23879	0.334722	32.3627	7.50139	High Carb	0.85852	0.761389	56.9829	F	39.8236	DZ	7.31667	FALSE	FALSE	predict5899	predict58992
30	0.072689	-2.44385	-3.44643	3.04263	1.83472	27.6773	8.00139	OGTT	1.21501	4.29194	56.9829	F	39.8236	DZ	7.38333	FALSE	TRUE	predict5899	predict58992
43	-0.068289	-0.596627	0.053571	2.86629	1.50139	27.0352	11.3347	UK Average	0.765639	0.494722	56.9829	F	39.8236	DZ	7.4	FALSE	FALSE	predict5899	predict58992
44	-0.094541	3.35337	0.636905	4.45457	0.001389	37.1478	6.50139	OGTT	1.19597	-1.99222	56.9829	F	39.8236	DZ	7.43333	FALSE	FALSE	predict5899	predict58992
51	-0.129763	-0.209127	-0.463095	1.75694	0.668056	25.4082	7.33472	UK Average	0.709635	1.12417	56.9829	F	39.8236	DZ	7.46667	FALSE	FALSE	predict5899	predict58992
41.5	-0.108567	-2.35218	0.220238	3.47813	0.501389	26.5396	6.66806	High Fibre	0.732194	0.593056	56.9829	F	39.8236	DZ	7.48333	FALSE	FALSE	predict5899	predict58992
11	0.066549	1.09087	0.036905	4.23215	0.001389	28.8946	6.83472	High Protein	0.64291	0.608889	56.9829	F	39.8236	DZ	7.51667	FALSE	FALSE	predict5899	predict58992
29	0.042833	-0.484127	1.68691	3.38784	2.33472	35.2254	9.33472	High Protein	0.812303	0.626667	56.9829	F	39.8236	DZ	7.53333	FALSE	TRUE	predict5899	predict58992
68.5	-0.010742	0.237103	0.536905	2.96973	1.50139	31.0097	8.16806	High Carb	0.965631	1.23889	57.744	F	26.982	MZ	6.65	FALSE	FALSE	predict5917	predict59172
60.5	-0.079023	0.074604	0.503571	3.47618	1.33472	32.8937	7.83472	OGTT	1.34509	0.0902778	57.744	F	26.982	MZ	6.61667	FALSE	FALSE	predict5917	predict59172
70	0.022145	-0.803174	0.153571	3.30131	0.001389	31.1505	9.00139	UK Average	0.741929	1.53778	57.744	F	26.982	MZ	6.58333	FALSE	FALSE	predict5917	predict59172
76.5	-0.019729	-0.071231	-0.329762	4.68773	1.00139	36.2839	8.00139	UK Average	0.972088	0.9625	57.744	F	26.982	MZ	6.55	FALSE	FALSE	predict5917	predict59172
57	-0.004771	-1.06151	-0.429762	5.13835	0.668056	32.8575	8.66806	OGTT	1.25141	0.461111	57.744	F	26.982	MZ	6.5	FALSE	FALSE	predict5917	predict59172
67	0.00702	0.466269	1.02024	4.9207	1.00139	27.1358	8.50139	High Protein	0.910571	0.651389	57.744	F	26.982	MZ	6.46667	FALSE	TRUE	predict5917	predict59172
61.5	0.043006	0.069047	0.353571	3.24318	2.00139	31.3743	9.83472	High Fat	0.840242	0.905833	57.744	F	26.982	MZ	6.43333	FALSE	TRUE	predict5917	predict59172
60.5	0.030431	-0.355952	-0.429762	5.55846	1.33472	41.5385	8.66806	High Fibre	1.02001	1.34056	57.744	F	26.982	MZ	6.4	FALSE	FALSE	predict5917	predict59172
67.25	0.019084	0.620337	-0.178571	3.6073	1.83472	40.8303	8.83472	MCB	0.899668	0.984167	60.6023	F	23.8225	DZ	6.23333	TRUE	FALSE	predict593	predict5931
67.25	-0.004368	-0.826885	-1.1119	4.1943	1.16806	27.3213	8.00139	High Carb	1.58693	1.78833	60.6023	F	23.8225	DZ	6.2	TRUE	FALSE	predict593	predict5931
65	-0.006061	-0.815774	-0.445238	2.73721	0.668056	39.8756	8.66806	High Carb	1.72887	1.64139	60.6023	F	23.8225	DZ	6.15	TRUE	TRUE	predict593	predict5931
76.75	-0.010364	0.432837	1.18809	3.32911	0.834722	43.4845	10.0014	OGTT	1.43886	0.228056	60.6023	F	23.8225	DZ	6.11667	TRUE	TRUE	predict593	predict5931
71.3333	0.023289	-0.161607	0.004762	1.32296	0.001389	40.9495	7.33472	UK Average	1.18554	1.30639	60.6023	F	23.8225	DZ	6.08333	TRUE	FALSE	predict593	predict5931
67.75	0.064436	-1.15744	-0.911905	5.18708	1.33472	52.4523	6.83472	UK Average	1.27698	0.827778	60.6023	F	23.8225	DZ	6.05	TRUE	FALSE	predict593	predict5931
56.75	0.01024	-0.889385	-1.32857	3.15452	1.50139	36.6087	11.3347	OGTT	1.66094	1.54833	60.6023	F	23.8225	DZ	6.01667	TRUE	FALSE	predict593	predict5931
68.6667	-0.026423	-0.336607	-0.495238	5.28343	0.668056	70.557	9.66806	High Protein	1.0967	1.3525	60.6023	F	23.8225	DZ	5.98333	TRUE	FALSE	predict593	predict5931
71.25	0.028849	1.67867	0.671429	4.37213	0.001389	31.0157	11.0014	High Fibre	1.43024	0.617778	60.6023	F	23.8225	DZ	5.95	TRUE	FALSE	predict593	predict5931
63.75	-0.069021	1.25506	1.1381	3.5149	2.50139	37.9508	9.16806	High Fat	0.93567	0.386667	60.6023	F	23.8225	DZ	5.9	TRUE	TRUE	predict593	predict5931
48.5	0.034506	1.6	0.645833	2.70723	2.50139	37.0068	7.66806	MCB	0.945454	0.385556	46.768	M	23.0314	DZ	6.26667	TRUE	FALSE	predict5935	predict59351
51.25	0.032141	-0.765277	1.99583	1.75582	2.00139	23.8069	8.33472	High Carb	0.62762	0.482778	46.768	M	23.0314	DZ	6.23333	TRUE	FALSE	predict5935	predict59351
77	-0.016332	1.6	0.579167	4.66811	1.50139	37.107	9.33472	High Carb	0.897825	1.98583	46.768	M	23.0314	DZ	6.2	TRUE	FALSE	predict5935	predict59351
48	-0.045626	-2.25417	-3.1375	3.13506	0.168056	35.9152	8.50139	OGTT	1.09775	5.94667	46.768	M	23.0314	DZ	6.11667	TRUE	TRUE	predict5935	predict59351
68.5	-0.013075	0.861111	0.1125	2.44099	0.168056	27.7804	9.16806	UK Average	0.483489	2.44111	46.768	M	23.0314	DZ	6.08333	TRUE	FALSE	predict5935	predict59351
63.6667	-0.020523	1.72639	0.529167	2.28145	0.001389	23.388	10.3347	OGTT	1.04618	0.584722	46.768	M	23.0314	DZ	6.05	TRUE	FALSE	predict5935	predict59351
78	-0.000706	0.926389	0.079167	3.82592	1.16806	27.0237	6.50139	High Fibre	0.742153	2.7025	46.768	M	23.0314	DZ	6.01667	TRUE	FALSE	predict5935	predict59351
75.5	-0.030397	1.07222	0.379167	2.41314	0.334722	46.6147	10.0014	High Protein	0.867415	0.848333	46.768	M	23.0314	DZ	5.98333	TRUE	FALSE	predict5935	predict59351
64	0.016073	-1.14757	-0.440278	11.9226	0.668056	66.5735	9.16806	High Fat	0.759996	2.13694	53.4456	F	28.1144	DZ	6.5	TRUE	FALSE	predict5938	predict59381
68.25	0.010383	2.04826	-0.140278	8.91852	0.001389	46.6874	6.33472	High Fat	0.850463	2.05667	53.4456	F	28.1144	DZ	6.51667	TRUE	FALSE	predict5938	predict59381
54.5	0.024473	-0.851737	-0.740278	6.28388	0.668056	44.8704	8.16806	High Carb	0.925284	0.618056	53.4456	F	28.1144	DZ	6.55	TRUE	FALSE	predict5938	predict59381
63	-0.02106	0.292708	0.859722	6.42611	1.66806	62.7703	7.50139	High Carb	1.13587	0.361389	53.4456	F	28.1144	DZ	6.56667	TRUE	TRUE	predict5938	predict59381
55.6667	0.027058	0.503819	1.05972	16.7413	1.33472	64.7387	9.16806	OGTT	1.47894	0.106944	53.4456	F	28.1144	DZ	6.6	TRUE	TRUE	predict5938	predict59381
64	0.031849	-0.017014	-0.256944	7.40864	0.001389	62.8798	12.0014	UK Average	0.418746	1.09889	53.4456	F	28.1144	DZ	6.63333	TRUE	FALSE	predict5938	predict59381
56	0.014591	-0.796181	-0.273611	7.02731	0.001389	44.2954	6.33472	UK Average	0.780392	0.6875	53.4456	F	28.1144	DZ	6.65	TRUE	FALSE	predict5938	predict59381
46	0.052454	-0.554514	-0.256944	14.1346	0.834722	45.8481	6.33472	High Protein	0.691187	0.715556	53.4456	F	28.1144	DZ	6.7	TRUE	FALSE	predict5938	predict59381
55	-0.032285	0.076041	-0.690278	11.057	0.001389	46.7455	8.00139	High Protein	0.453549	0.660278	53.4456	F	28.1144	DZ	6.73333	TRUE	FALSE	predict5938	predict59381
71.6667	0.023002	-0.369246	-0.592857	6.12903	1.83472	30.95	7.00139	MCB	0.723496	2.21194	52.3094	M	25.5778	DZ	7.83333	FALSE	FALSE	predict615	predict6152
76.6667	-0.042808	-0.977579	-0.842857	4.74544	0.501389	90.742	13.5014	High Carb	0.931588	2.4375	52.3094	M	25.5778	DZ	7.8	FALSE	FALSE	predict615	predict6152
65	0.022928	1.22937	1.14048	4.08172	3.16806	32.4786	12.8347	High Carb	0.682814	0.449167	52.3094	M	25.5778	DZ	7.78333	FALSE	TRUE	predict615	predict6152
55	0.04733	1.01409	1.40714	3.3492	3.00139	75.1096	10.5014	OGTT	0.920981	0.201944	52.3094	M	25.5778	DZ	7.76667	FALSE	TRUE	predict615	predict6152
68	-0.08808	0.504365	-0.492857	6.45849	0.834722	95.5414	13.1681	UK Average	0.843239	2.08722	52.3094	M	25.5778	DZ	7.73333	FALSE	FALSE	predict615	predict6152
67.5	-0.083464	1.17798	0.140476	6.23531	2.33472	59.97	13.0014	UK Average	0.869035	1.46944	52.3094	M	25.5778	DZ	7.71667	FALSE	FALSE	predict615	predict6152
70.5	0.074356	0.579365	-0.192857	5.27374	1.83472	78.1725	10.0014	OGTT	0.959784	1.84917	52.3094	M	25.5778	DZ	7.7	FALSE	FALSE	predict615	predict6152
64.6667	0.034799	0.219643	-0.27619	5.14253	0.001389	29.715	10.6681	High Protein	0.501006	1.99528	52.3094	M	25.5778	DZ	7.66667	FALSE	FALSE	predict615	predict6152
56.5	0.009825	1.58353	1.45714	3.2498	3.00139	23.4962	12.3347	High Fibre	1.00669	0.125278	52.3094	M	25.5778	DZ	7.61667	FALSE	TRUE	predict615	predict6152
68.6667	-0.082804	-2.20637	-1.25139	3.48362	2.16806	73.0334	8.16806	High Carb	1.36219	0.3975	53.9521	F	30.5848	MZ	7.93333	FALSE	FALSE	predict628	predict6281
62.75	0.064492	-0.596644	-0.434722	2.52472	3.00139	44.1097	8.50139	UK Average	1.11513	0.368333	53.9521	F	30.5848	MZ	7.9	FALSE	TRUE	predict628	predict6281
49.3333	0.050788	-0.523032	-1.20139	2.91283	1.66806	52.3502	8.33472	UK Average	1.20942	0.26	53.9521	F	30.5848	MZ	7.85	FALSE	FALSE	predict628	predict6281
53.5	-0.016114	-0.928588	-0.684722	2.67499	1.00139	49.5386	8.16806	High Fat	0.978042	0.359722	53.9521	F	30.5848	MZ	7.83333	FALSE	FALSE	predict628	predict6281
63.25	0.01952	0.900579	0.231944	4.03836	0.834722	40.8075	7.83472	High Fibre	1.21072	0.140556	53.9521	F	30.5848	MZ	7.8	FALSE	FALSE	predict628	predict6281
73.5	-0.009824	-0.200962	0.007692	3.62537	0.168056	36.2413	9.33472	MCB	0.866624	0.550833	53.9521	F	27.3314	MZ	7.95	FALSE	FALSE	predict628	predict6282
62.75	-0.018626	-0.721795	-0.275641	1.56893	1.66806	43.6787	7.00139	High Carb	1.01068	0.606111	53.9521	F	27.3314	MZ	7.93333	FALSE	FALSE	predict628	predict6282
73.3333	-0.01347	-0.748184	-0.808974	2.26993	0.501389	44.6124	13.0014	High Carb	1.17335	0.437778	53.9521	F	27.3314	MZ	7.91667	FALSE	TRUE	predict628	predict6282
66.5	0.002558	-0.780128	-0.858974	2.30224	0.501389	46.6286	7.50139	OGTT	1.5563	1.46028	53.9521	F	27.3314	MZ	7.9	FALSE	TRUE	predict628	predict6282
78	0.048235	-0.059295	-0.258974	1.81989	0.334722	48.4993	8.00139	OGTT	1.37787	0.478611	53.9521	F	27.3314	MZ	7.88333	FALSE	FALSE	predict628	predict6282
80.5	0.098576	-1.30652	-1.60897	2.26214	0.001389	46.4055	7.66806	UK Average	0.979461	1.03694	53.9521	F	27.3314	MZ	7.86667	FALSE	FALSE	predict628	predict6282
69.25	-0.015929	2.16709	1.49103	1.9666	0.001389	40.1898	6.33472	UK Average	0.368746	0.264722	53.9521	F	27.3314	MZ	7.85	FALSE	FALSE	predict628	predict6282
74	0.032452	0.375427	0.041026	5.40551	2.00139	37.0406	7.66806	High Protein	0.597608	0.29	53.9521	F	27.3314	MZ	7.8	FALSE	FALSE	predict628	predict6282
72	-0.0523	1.30598	1.25769	1.99384	0.834722	41.4735	8.16806	High Fibre	1.14186	0.0480556	53.9521	F	27.3314	MZ	7.78333	FALSE	TRUE	predict628	predict6282
69.6667	-0.01479	-2.2234	-0.364103	3.47428	0.168056	28.5067	9.83472	High Carb	0.971123	2.89833	47.5866	F	27.6276	MZ	7.56667	FALSE	FALSE	predict6382	predict63821
73.5	-0.089728	-1.12756	-0.347436	3.31489	2.00139	27.3519	9.50139	UK Average	0.976265	2.24167	47.5866	F	27.6276	MZ	7.53333	FALSE	FALSE	predict6382	predict63821
71.3333	0.012487	3.44188	1.31923	3.68547	0.168056	22.8454	6.66806	High Fibre	0.994931	0.835278	47.5866	F	27.6276	MZ	7.41667	FALSE	TRUE	predict6382	predict63821
53.3333	0.000105	-0.884524	0.495238	4.21986	2.33472	24.6118	9.16806	High Carb	0.889499	1.06111	47.5866	F	25.9504	MZ	7.58333	FALSE	TRUE	predict6382	predict63822
38	-0.017479	1.85437	1.49524	5.65793	5.16806	30.0233	6.66806	OGTT	0.920961	1.25028	47.5866	F	25.9504	MZ	7.5	FALSE	FALSE	predict6382	predict63822
44	0.016245	1.08631	1.04524	3.00164	0.834722	28.7016	10.1681	UK Average	0.947955	0.640833	47.5866	F	25.9504	MZ	7.48333	FALSE	FALSE	predict6382	predict63822
31	-0.022695	2.26687	1.96191	5.74642	2.00139	36.8665	8.83472	OGTT	1.45354	0.243611	47.5866	F	25.9504	MZ	7.45	FALSE	FALSE	predict6382	predict63822
49.3333	-0.003629	-0.398413	-0.071429	4.8277	0.834722	17.2955	8.83472	High Fat	0.625781	1.09	47.5866	F	25.9504	MZ	7.41667	FALSE	TRUE	predict6382	predict63822
53	-0.01941	0.039087	0.828571	4.75678	0.001389	46.0001	8.33472	High Fibre	1.0483	1.12444	47.5866	F	25.9504	MZ	7.4	FALSE	TRUE	predict6382	predict63822
38.6667	0.011302	-1.31647	-1.18809	4.6222	0.168056	37.6381	9.33472	High Protein	0.588578	1.61472	47.5866	F	25.9504	MZ	7.36667	FALSE	FALSE	predict6382	predict63822
50.75	-0.021367	0.637698	-0.988095	4.92028	-5.49861	32.423	9.83472	MCB	1.08555	1.39889	47.5866	F	25.9504	MZ	7.33333	FALSE	FALSE	predict6382	predict63822
66.3333	0.013376	-1.47956	0.545238	5.79474	2.33472	50.6929	9.50139	High Fat	0.665022	1.70861	64.2245	F	27.3587	MZ	7.65	TRUE	FALSE	predict6416	predict64161
58.6667	-0.051059	0.571825	0.295238	4.65558	0.001389	49.1934	8.50139	High Carb	0.854483	1.54194	64.2245	F	27.3587	MZ	7.68333	TRUE	FALSE	predict6416	predict64161
74	0.002651	-0.969841	0.811905	3.72984	2.00139	50.1385	6.66806	High Carb	0.795262	1.51944	64.2245	F	27.3587	MZ	7.7	TRUE	FALSE	predict6416	predict64161
52	0.011655	0.849603	1.24524	4.87449	1.66806	45.8938	8.33472	OGTT	1.06569	0.607222	64.2245	F	27.3587	MZ	7.73333	TRUE	TRUE	predict6416	predict64161
47.5	0.014407	-0.074008	-0.121429	3.31688	0.668056	33.9541	8.83472	UK Average	0.893951	0.708333	64.2245	F	27.3587	MZ	6.81667	FALSE	FALSE	predict6416	predict64161
48.5	0.016313	-0.13373	-0.404762	2.21968	2.00139	34.125	10.6681	High Fibre	0.975401	1.24444	64.2245	F	27.3587	MZ	6.91667	FALSE	FALSE	predict6416	predict64161
56.6667	-0.000726	-2.23234	-2.28095	2.4134	0.168056	40.5166	10.1681	High Fat	0.668135	3.66111	64.2245	F	24.8813	MZ	7.65	TRUE	FALSE	predict6416	predict64162
61.3333	0.006277	2.30933	1.96905	2.08048	0.001389	52.6441	7.50139	High Carb	0.875943	0.674167	64.2245	F	24.8813	MZ	7.7	TRUE	FALSE	predict6416	predict64162
65.5	-0.018019	1.01072	0.902381	2.22855	1.00139	54.1087	10.0014	UK Average	0.865869	1.05139	64.2245	F	24.8813	MZ	7.73333	TRUE	TRUE	predict6416	predict64162
60.25	0.024271	-0.35873	0.119048	2.23923	2.33472	31.0037	7.66806	High Protein	0.444861	0.545278	64.2245	F	24.8813	MZ	6.85	FALSE	FALSE	predict6416	predict64162
59	0.019917	-0.530952	-0.264286	3.52353	2.00139	73.0414	7.33472	High Protein	0.534096	0.754167	64.2245	F	24.8813	MZ	6.88333	FALSE	FALSE	predict6416	predict64162
76.3333	0.006756	-0.306449	-0.669048	2.19885	1.66806	25.2572	12.5014	MCB	0.751138	0.989722	48.1971	F	21.8685	MZ	7.3	FALSE	FALSE	predict6427	predict64271
73.8	0.035464	-2.03839	-0.935714	2.99357	0.168056	31.7399	12.5014	High Carb	1.32371	0.884444	48.1971	F	21.8685	MZ	7.26667	FALSE	FALSE	predict6427	predict64271
76.25	-0.031039	-0.01756	-0.152381	3.11322	0.001389	21.4398	10.1681	High Carb	1.24891	0.585278	48.1971	F	21.8685	MZ	7.23333	FALSE	FALSE	predict6427	predict64271
62	-0.005387	-0.598115	-0.285714	3.79777	1.83472	63.788	10.1681	OGTT	1.26039	0.626667	48.1971	F	21.8685	MZ	7.2	FALSE	TRUE	predict6427	predict64271
73	-0.05204	0.910218	0.314286	3.04848	0.001389	38.7838	8.83472	UK Average	1.1482	0.193333	48.1971	F	21.8685	MZ	7.16667	FALSE	TRUE	predict6427	predict64271
75.75	0.013625	0.51994	-0.369048	3.61232	1.16806	78.2131	7.66806	UK Average	1.12509	0.555278	48.1971	F	21.8685	MZ	7.13333	FALSE	FALSE	predict6427	predict64271
66.3333	0.008609	0.467162	-0.102381	3.64392	0.001389	21.1623	10.0014	OGTT	1.07537	0.413333	48.1971	F	21.8685	MZ	7.1	FALSE	FALSE	predict6427	predict64271
84.25	0.037718	0.343551	-0.552381	3.55596	0.334722	21.6107	12.1681	High Protein	0.594663	0.851944	48.1971	F	21.8685	MZ	7.06667	FALSE	FALSE	predict6427	predict64271
80	0.017091	-2.21062	-0.585714	2.89977	1.00139	34.819	13.8347	High Fat	0.838544	1.0425	48.1971	F	21.8685	MZ	7.03333	FALSE	FALSE	predict6427	predict64271
72.3333	-0.069309	0.858829	0.347619	2.90575	0.501389	20.6343	13.0014	High Fibre	1.1258	0.358333	48.1971	F	21.8685	MZ	7	FALSE	FALSE	predict6427	predict64271
71.5	0.050151	-2.00258	0.772619	3.24465	2.83472	27.4214	13.5014	High Carb	1.40552	0.68	60.7474	F	31.6961	DZ	7.73333	FALSE	TRUE	predict6442	predict64422
80	-0.051648	0.855754	0.639286	4.27604	0.001389	22.9015	8.50139	OGTT	1.86181	-1.65028	60.7474	F	31.6961	DZ	7.85	FALSE	FALSE	predict6442	predict64422
81.5	-0.027157	2.43363	-1.06548	5.28491	2.00139	61.4619	6.00139	High Fat	0.743932	6.7675	63.989	M	26.7942	MZ	6.95	TRUE	TRUE	predict6505	predict65051
71.75	0.022544	-3.02887	-5.04881	4.60244	1.00139	32.0419	9.33472	High Carb	1.45529	9.00944	63.989	M	26.7942	MZ	6.98333	TRUE	TRUE	predict6505	predict65051
61	0.063898	-0.378869	-0.382143	2.55081	0.668056	31.9885	6.50139	High Carb	1.4806	3.37083	63.989	M	26.7942	MZ	7	TRUE	FALSE	predict6505	predict65051
70.6667	0.012445	0.408631	0.084524	8.2405	1.83472	27.4704	11.3347	OGTT	1.65609	2.66722	63.989	M	26.7942	MZ	7.03333	TRUE	FALSE	predict6505	predict65051
51.5	0.037862	-1.87054	-0.432143	2.08276	1.50139	30.7465	6.66806	OGTT	1.61687	3.21028	63.989	M	26.7942	MZ	7.05	TRUE	FALSE	predict6505	predict65051
64.75	0.005288	-1.13859	0.20119	3.59351	2.33472	24.3255	7.33472	UK Average	1.32035	2.41917	63.989	M	26.7942	MZ	7.08333	TRUE	FALSE	predict6505	predict65051
63.5	-0.060574	3.26558	0.934524	2.78724	1.83472	28.3139	7.16806	UK Average	1.33533	1.95806	63.989	M	26.7942	MZ	7.11667	TRUE	FALSE	predict6505	predict65051
65.5	-0.053402	0.493353	2.11786	1.81429	0.668056	39.3684	10.0014	High Protein	1.33555	2.17806	63.989	M	26.7942	MZ	7.13333	TRUE	TRUE	predict6505	predict65051
72	-0.055422	1.13641	0.85119	3.49573	1.16806	60.8816	6.83472	High Fibre	1.39844	0.852778	63.989	M	26.7942	MZ	7.16667	TRUE	TRUE	predict6505	predict65051
67.75	0.01763	-1.33165	-0.89881	6.2505	2.00139	39.0162	13.5014	High Protein	1.10968	2.31528	63.989	M	26.7942	MZ	7.2	TRUE	FALSE	predict6505	predict65051
76	0.029091	-1.74851	-1.42024	4.0173	0.001389	29.6548	6.66806	High Fat	0.804803	5.61667	63.989	M	28.1571	MZ	6.95	TRUE	TRUE	predict6505	predict65052
63	-0.094783	0.487599	0.713095	2.42704	1.66806	59.1511	5.66806	High Carb	1.59163	1.43639	63.989	M	28.1571	MZ	6.98333	TRUE	TRUE	predict6505	predict65052
79	0.04147	-0.524901	-0.603571	1.59676	0.501389	30.0414	9.00139	High Carb	1.53657	1.91417	63.989	M	28.1571	MZ	7	TRUE	FALSE	predict6505	predict65052
69.5	0.019427	-0.683234	-0.470238	2.91572	1.00139	49.8426	12.3347	UK Average	1.23006	1.6375	63.989	M	28.1571	MZ	7.03333	TRUE	FALSE	predict6505	predict65052
69	-0.003031	-0.540179	-0.470238	3.64322	0.168056	24.9513	6.66806	OGTT	1.32137	1.69722	63.989	M	28.1571	MZ	7.05	TRUE	FALSE	predict6505	predict65052
59.6667	0.0191	-1.24018	-0.503571	7.2333	0.501389	25.9825	6.66806	UK Average	1.09984	1.25028	63.989	M	28.1571	MZ	7.08333	TRUE	FALSE	predict6505	predict65052
53.6667	-0.001736	1.59454	0.546429	2.05958	0.001389	33.5063	12.0014	High Protein	1.27555	0.815278	63.989	M	28.1571	MZ	7.16667	TRUE	TRUE	predict6505	predict65052
57.75	-0.010169	-0.731746	0.059524	3.26567	0.001389	26.3073	10.0014	High Fat	0.748678	3.53667	59.9069	F	36.1225	MZ	6.11667	TRUE	FALSE	predict6565	predict65651
48.3333	0.021708	-1.14008	-0.77381	3.51475	2.16806	34.7388	10.6681	High Fat	0.62134	5.88667	59.9069	F	36.1225	MZ	6.15	TRUE	FALSE	predict6565	predict65651
81	0.007203	-0.244246	0.659524	3.06897	0.668056	42.5432	8.16806	High Carb	1.30612	2.44417	59.9069	F	36.1225	MZ	6.18333	TRUE	FALSE	predict6565	predict65651
73.75	-0.001839	-1.49564	-0.757143	3.61249	1.50139	32.009	5.66806	High Carb	1.18729	3.6175	59.9069	F	36.1225	MZ	6.2	TRUE	TRUE	predict6565	predict65651
38	-0.005314	-0.087302	0.342857	4.37132	1.33472	26.5656	6.33472	OGTT	1.03416	0.841944	59.9069	F	36.1225	MZ	6.23333	TRUE	TRUE	predict6565	predict65651
53	-0.03909	2.10159	1.00952	4.78345	2.83472	28.2018	9.00139	OGTT	1.11328	1.18417	59.9069	F	36.1225	MZ	6.25	TRUE	FALSE	predict6565	predict65651
62.5	-0.026141	2.17659	0.87619	3.62091	4.00139	32.0565	8.66806	UK Average	0.906379	1.735	59.9069	F	36.1225	MZ	6.28333	TRUE	FALSE	predict6565	predict65651
73	0.026297	-2.48175	2.24286	2.85612	0.001389	35.5026	9.00139	UK Average	1.22631	3.37528	59.9069	F	36.1225	MZ	6.31667	TRUE	FALSE	predict6565	predict65651
79.5	-0.037151	1.18214	-2.24048	1.10701	0.001389	26.37	8.50139	High Fibre	1.09748	4.84528	59.9069	F	36.1225	MZ	6.33333	TRUE	FALSE	predict6565	predict65651
70.3333	0.018221	0.733532	-0.890476	1.32341	1.16806	32.5867	8.83472	High Protein	0.857579	3.49944	59.9069	F	36.1225	MZ	6.36667	TRUE	FALSE	predict6565	predict65651
70	0.0265	0.633532	0.62619	2.0724	0.001389	26.7173	8.50139	High Protein	0.741023	1.97944	59.9069	F	36.1225	MZ	6.38333	TRUE	TRUE	predict6565	predict65651
80.5	-0.009021	1.86836	0.9	2.8031	0.834722	28.1188	11.1681	High Fat	0.649577	3.23333	59.9069	F	30.5618	MZ	6.15	TRUE	FALSE	predict6565	predict65652
81.75	-0.005451	0.115586	0.1	4.4527	1.66806	27.9718	9.50139	High Carb	1.02913	2.51944	59.9069	F	30.5618	MZ	6.18333	TRUE	FALSE	predict6565	predict65652
74	0.040235	-1.05802	-1.18333	2.02001	0.168056	40.5542	8.16806	High Carb	1.19907	3.55694	59.9069	F	30.5618	MZ	6.2	TRUE	TRUE	predict6565	predict65652
77.5	0.034059	-0.030247	0.2	2.49193	1.66806	29.0467	6.66806	UK Average	0.877096	1.92944	59.9069	F	30.5618	MZ	6.23333	TRUE	TRUE	predict6565	predict65652
57.6	0.034923	-0.992747	-1.46667	2.82976	0.334722	32.7884	10.0014	UK Average	1.14625	1.3625	59.9069	F	30.5618	MZ	6.25	TRUE	FALSE	predict6565	predict65652
76	-0.084155	-1.82747	-0.3	3.14683	1.50139	28.1053	8.66806	OGTT	1.18677	0.690278	59.9069	F	30.5618	MZ	6.28333	TRUE	FALSE	predict6565	predict65652
33	-0.022722	2.84892	1.66667	1.30546	1.33472	22.2561	6.50139	OGTT	1.4161	-1.80972	59.9069	F	30.5618	MZ	6.31667	TRUE	FALSE	predict6565	predict65652
69.5	0.041217	-0.4	-0.197619	2.46424	0.501389	46.6069	8.00139	UK Average	0.897131	0.452778	44.95	F	21.0459	MZ	5.78333	TRUE	FALSE	predict657	predict6571
68.3333	0.045676	0.2875	-0.264286	1.87377	0.334722	70.9861	9.00139	High Fat	0.308252	0.375556	44.95	F	21.0459	MZ	5.8	TRUE	FALSE	predict657	predict6571
73	-0.080329	-0.526389	2.50238	4.92366	2.83472	58.7945	7.66806	High Fat	0.72423	-1.23667	44.95	F	21.0459	MZ	5.83333	TRUE	TRUE	predict657	predict6571
70	-0.064951	-0.780555	-0.314286	6.1943	0.334722	61.7823	10.6681	OGTT	0.776795	0.185278	44.95	F	21.0459	MZ	5.86667	TRUE	TRUE	predict657	predict6571
71.5	0.029819	-1.16944	-1.86429	4.67591	0.668056	112.342	12.6681	OGTT	0.845021	2.44028	44.95	F	21.0459	MZ	5.88333	TRUE	FALSE	predict657	predict6571
64	-0.00163	0.563889	0.335714	5.69143	3.33472	64.9996	7.16806	High Carb	0.9953	-1.33556	44.95	F	21.0459	MZ	5.93333	TRUE	FALSE	predict657	predict6571
58.6667	0.038797	-0.501389	-0.897619	2.14566	1.50139	48.2735	8.83472	High Fibre	0.89705	0.129722	44.95	F	21.0459	MZ	5.96667	TRUE	FALSE	predict657	predict6571
37.3333	-0.077904	2.24444	-0.880952	2.54506	0.001389	24.7246	7.16806	High Fat	0.848634	0.898889	44.95	F	23.7698	MZ	5.78333	TRUE	FALSE	predict657	predict6572
70	0.016508	-0.818056	-1.13095	4.26256	1.16806	33.4869	6.83472	UK Average	1.12647	0.804444	44.95	F	23.7698	MZ	5.8	TRUE	FALSE	predict657	predict6572
61.5	0.065525	-0.705556	-1.13095	3.21956	0.334722	37.8342	8.50139	UK Average	0.820468	0.605556	44.95	F	23.7698	MZ	5.83333	TRUE	TRUE	predict657	predict6572
34	0.034986	0.036111	0.135714	1.77535	1.50139	34.7646	6.66806	High Carb	1.17405	0.537778	44.95	F	23.7698	MZ	5.86667	TRUE	TRUE	predict657	predict6572
51	0.006672	-0.509723	-0.597619	2.16748	1.50139	38.0084	10.0014	High Carb	1.18266	0.709167	44.95	F	23.7698	MZ	5.88333	TRUE	FALSE	predict657	predict6572
49.5	0.038948	1.39305	0.969048	4.2114	0.001389	41.0116	8.00139	OGTT	1.02602	0.394444	44.95	F	23.7698	MZ	5.91667	TRUE	FALSE	predict657	predict6572
52.5	0.035021	-1.20833	-0.814286	3.99904	0.168056	103.468	10.6681	OGTT	0.962138	0.686944	44.95	F	23.7698	MZ	5.93333	TRUE	FALSE	predict657	predict6572
79	0.026831	-0.672123	-1.49524	2.07189	0.668056	43.3175	7.83472	High Fat	0.688701	1.56611	49.1882	F	23.5955	DZ	7.25	TRUE	FALSE	predict6590	predict65902
87.3333	-0.007379	2.76538	-0.128571	3.72499	0.501389	48.6074	8.50139	High Fat	0.758412	0.274444	49.1882	F	23.5955	DZ	7.28333	TRUE	FALSE	predict6590	predict65902
72.3333	0.027569	-1.21657	2.57143	5.86015	-8.66528	60.6016	13.8347	High Carb	1.07494	0.4125	49.1882	F	23.5955	DZ	7.33333	TRUE	TRUE	predict6590	predict65902
75	-0.073411	-4.09296	2.60476	3.84605	2.00139	24.5521	0.001389	UK Average	1.49684	0.297222	49.1882	F	23.5955	DZ	7.36667	TRUE	TRUE	predict6590	predict65902
80	0.012417	0.638988	-1.64524	4.0783	0.001389	42.0641	9.16806	UK Average	0.716322	1.28944	49.1882	F	23.5955	DZ	7.38333	TRUE	FALSE	predict6590	predict65902
74	0.023547	2.67093	-0.678571	5.03079	0.334722	43.4593	8.50139	High Protein	0.691778	0.351389	49.1882	F	23.5955	DZ	7.48333	TRUE	FALSE	predict6590	predict65902
75	-0.066301	-0.961012	-1.82857	2.41177	2.66806	51.2341	7.00139	High Fibre	1.03606	1.35417	49.1882	F	23.5955	DZ	7.5	TRUE	FALSE	predict6590	predict65902
81.5	0.013394	-2.48046	-0.978571	1.9711	4.66806	40.2869	10.0014	High Protein	0.76248	1.41278	49.1882	F	23.5955	DZ	7.53333	TRUE	TRUE	predict6590	predict65902
86.5	0.002158	0.268055	-0.025	2.72372	0.501389	41.7623	12.1681	High Fat	0.246589	1.76056	51.4387	F	20.7099	MZ	7.15	FALSE	TRUE	predict6628	predict66281
52	0.02758	-1.0125	1.50833	3.15071	2.50139	137.991	6.66806	High Carb	0.897847	0.223611	51.4387	F	20.7099	MZ	7.18333	FALSE	TRUE	predict6628	predict66281
72.75	0.014476	0.394444	-0.475	2.97309	0.168056	44.7448	9.66806	High Carb	0.866895	1.715	51.4387	F	20.7099	MZ	7.2	FALSE	FALSE	predict6628	predict66281
32	-0.007219	-0.391667	-0.791667	4.36271	0.001389	42.4657	12.1681	OGTT	0.853254	0.870833	51.4387	F	20.7099	MZ	7.23333	FALSE	FALSE	predict6628	predict66281
66.6667	0.035196	-0.261111	-0.475	2.7726	0.834722	39.1492	12.3347	UK Average	0.83385	0.173333	51.4387	F	20.7099	MZ	7.26667	FALSE	FALSE	predict6628	predict66281
24.5	0.010136	1.49306	0.141667	3.87859	0.001389	29.5557	6.33472	OGTT	0.693024	0.0830556	51.4387	F	20.7099	MZ	7.28333	FALSE	FALSE	predict6628	predict66281
72.25	0.006446	-0.495834	-0.975	4.00463	0.168056	32.5043	9.33472	UK Average	0	1.68639	51.4387	F	20.7099	MZ	7.31667	FALSE	FALSE	predict6628	predict66281
82.3333	-0.033473	-0.440278	0.675	2.90393	2.00139	86.0358	5.33472	High Fibre	0.896324	1.77694	51.4387	F	20.7099	MZ	7.35	FALSE	TRUE	predict6628	predict66281
58.25	0.007613	-0.197223	0.625	2.69532	1.83472	125.714	7.00139	High Protein	0.470755	0.121111	51.4387	F	20.7099	MZ	7.38333	FALSE	TRUE	predict6628	predict66281
47.5	-0.013441	-0.675	-0.425	8.1829	0.334722	66.6484	9.50139	High Protein	0.584724	0.983889	51.4387	F	20.7099	MZ	7.4	FALSE	FALSE	predict6628	predict66281
49.75	0.033674	-1.85883	-2.53571	7.152	0.001389	49.0558	8.16806	High Fat	0.590828	3.49472	60.5914	M	30.2764	MZ	7.31667	FALSE	FALSE	predict6651	predict66512
66	0.028668	-0.778274	0.064286	2.23844	0.001389	55.8251	9.00139	High Carb	0.867225	1.29778	60.5914	M	30.2764	MZ	7.35	FALSE	TRUE	predict6651	predict66512
72.5	0.040303	-0.364385	0.347619	2.05394	1.83472	41.9355	8.00139	High Carb	0.769367	2.70528	60.5914	M	30.2764	MZ	7.38333	FALSE	TRUE	predict6651	predict66512
68	0.071685	0.614782	0.147619	6.38264	1.83472	33.4551	9.83472	UK Average	0.502119	1.44611	60.5914	M	30.2764	MZ	7.4	FALSE	FALSE	predict6651	predict66512
70	-0.053282	0.559226	0.580952	13.8386	2.33472	52.6903	8.16806	OGTT	0.826781	-0.311944	60.5914	M	30.2764	MZ	7.43333	FALSE	FALSE	predict6651	predict66512
66.6667	0.046614	-0.186607	0.130952	20.7882	0.001389	116.328	8.83472	UK Average	0.789031	0.426667	60.5914	M	30.2764	MZ	7.46667	FALSE	FALSE	predict6651	predict66512
65.25	0.068135	0.143948	-0.485714	13.9371	0.001389	43.3768	8.83472	OGTT	0.964252	0.146667	60.5914	M	30.2764	MZ	7.48333	FALSE	FALSE	predict6651	predict66512
71	-0.000122	0.56756	0.130952	12.4464	0.834722	53.9572	8.33472	High Protein	0.45622	0.135278	60.5914	M	30.2764	MZ	7.51667	FALSE	FALSE	predict6651	predict66512
76.3333	-0.072959	-0.50744	-0.985714	6.0679	0.668056	45.3705	7.66806	High Fibre	0.786253	1.02	60.5914	M	30.2764	MZ	7.53333	FALSE	TRUE	predict6651	predict66512
75.5	-0.075416	-1.363	-0.502381	3.67321	1.50139	35.4329	8.83472	High Protein	0.613708	0.848611	60.5914	M	30.2764	MZ	7.56667	FALSE	TRUE	predict6651	predict66512
80.3333	-0.00293	-0.305059	-0.702381	3.48808	0.001389	58.8994	7.50139	MCB	0.377024	1.16833	47.7125	F	22.0411	MZ	6.05	FALSE	FALSE	predict6655	predict66551
66.75	0.014284	-0.199504	0.114286	2.79404	0.501389	59.736	8.50139	High Carb	0.783055	0.509722	47.7125	F	22.0411	MZ	6.01667	FALSE	FALSE	predict6655	predict66551
63	-0.023055	0.272719	-0.352381	3.34814	0.668056	49.2512	7.83472	High Carb	0.611113	0.783333	47.7125	F	22.0411	MZ	5.98333	FALSE	FALSE	predict6655	predict66551
72	0.013672	0.479663	0.597619	5.97614	1.50139	56.5709	7.16806	UK Average	0.718147	0.286111	47.7125	F	22.0411	MZ	5.95	FALSE	TRUE	predict6655	predict66551
67.25	0.004544	-0.152281	-0.152381	6.39761	1.50139	53.6756	7.66806	OGTT	0.683778	1.36417	47.7125	F	22.0411	MZ	5.9	FALSE	TRUE	predict6655	predict66551
62.6667	-0.103838	1.96577	0.164286	6.86202	2.33472	39.4063	7.33472	OGTT	0.60476	0.268333	47.7125	F	22.0411	MZ	5.86667	FALSE	FALSE	predict6655	predict66551
67	-0.002167	0.093552	-0.069048	2.98236	0.668056	50.516	7.33472	UK Average	0.762936	0.41	47.7125	F	22.0411	MZ	5.83333	FALSE	FALSE	predict6655	predict66551
69.25	-0.035463	0.794941	0.797619	4.7614	1.50139	51.8188	7.16806	High Fibre	0.462966	0.212778	47.7125	F	22.0411	MZ	5.78333	FALSE	FALSE	predict6655	predict66551
67.25	0.042477	0.029663	0.030952	4.68024	2.00139	51.0669	7.83472	High Fat	0.39405	0.131944	47.7125	F	22.0411	MZ	5.75	FALSE	FALSE	predict6655	predict66551
64	0.034573	-0.238393	-0.185714	3.43216	0.001389	52.0425	7.33472	High Protein	0.598218	0.275	47.7125	F	22.0411	MZ	5.71667	FALSE	FALSE	predict6655	predict66551
46.5	0.07643	-1.20853	-1.12381	3.93278	1.50139	43.4602	6.50139	High Fat	0.865442	1.65917	55.8768	F	23.2999	MZ	7.96667	FALSE	FALSE	predict6666	predict66661
48	0.076348	-1.40159	-0.190476	3.92184	0.168056	45.6252	10.3347	MCB	0.864818	0.8875	55.8768	F	23.2999	MZ	7.95	FALSE	FALSE	predict6666	predict66661
25	0.030027	-0.782143	0.109524	11.7214	-10.9986	43.2429	9.00139	High Carb	1.16607	0.434444	55.8768	F	23.2999	MZ	7.93333	FALSE	FALSE	predict6666	predict66661
15.5	0.018112	1.29425	0.492857	3.73105	0.168056	37.7096	9.16806	OGTT	1.46509	0.112222	55.8768	F	23.2999	MZ	7.9	FALSE	TRUE	predict6666	predict66661
26	0.003263	0.005357	0.109524	7.8203	1.66806	46.7403	7.83472	OGTT	1.07794	0.470556	55.8768	F	23.2999	MZ	7.86667	FALSE	FALSE	predict6666	predict66661
33	0.048298	0.795635	0.109524	4.70977	2.00139	54.6366	7.50139	UK Average	1.02573	0.437778	55.8768	F	23.2999	MZ	7.85	FALSE	FALSE	predict6666	predict66661
49.5	-0.062999	0.009523	0.059524	4.13249	1.66806	41.3092	7.33472	High Protein	0.991967	0.629444	55.8768	F	23.2999	MZ	7.8	FALSE	FALSE	predict6666	predict66661
59.3333	0.020848	-3.86131	-3.22381	6.75097	3.83472	47.0708	8.83472	High Fibre	1.11303	3.77194	55.8768	F	23.2999	MZ	7.78333	FALSE	TRUE	predict6666	predict66661
54	0.019123	-0.597222	-0.321429	3.73441	2.16806	34.3278	7.16806	High Carb	0.878436	0.442222	55.8768	F	27.0012	MZ	7.93333	FALSE	FALSE	predict6666	predict66662
64.6	-0.017363	-0.818056	-0.154762	4.27151	2.50139	34.2279	7.33472	High Carb	0.909307	0.304167	55.8768	F	27.0012	MZ	7.91667	FALSE	TRUE	predict6666	predict66662
47.3333	0.053347	0.341666	-0.154762	2.34656	0.168056	59.8375	7.50139	OGTT	0.864668	0.283611	55.8768	F	27.0012	MZ	7.88333	FALSE	FALSE	predict6666	predict66662
60.6	0.006045	-0.231945	-0.071429	4.53493	0.834722	24.295	6.33472	OGTT	0.881645	0.208889	55.8768	F	27.0012	MZ	7.86667	FALSE	FALSE	predict6666	predict66662
72.4	-0.003399	0.031944	-0.471429	3.50727	1.83472	25.8435	13.6681	UK Average	0.83233	0.513333	55.8768	F	27.0012	MZ	7.85	FALSE	FALSE	predict6666	predict66662
62.6	0.040211	-0.126389	-0.371429	4.39049	1.00139	28.9334	10.8347	High Fat	0.679144	0.492778	55.8768	F	27.0012	MZ	7.8	FALSE	FALSE	predict6666	predict66662
51.25	0.029993	-0.848611	-1.07143	3.89632	0.501389	37.7592	7.66806	High Fibre	0.90355	1.24139	55.8768	F	27.0012	MZ	7.76667	FALSE	TRUE	predict6666	predict66662
62	-0.059631	0.093651	0.2	3.97509	0.001389	54.6502	12.6681	High Fat	0.636667	1.06833	53.5277	M	29.2195	MZ	6.5	TRUE	FALSE	predict6667	predict66671
88.5	-0.004203	-0.073016	-0.083333	3.01453	0.501389	41.7207	9.66806	High Carb	0.770464	1.68667	53.5277	M	29.2195	MZ	6.51667	TRUE	FALSE	predict6667	predict66671
71.25	0.02656	-2.00079	-1.91667	6.47435	0.001389	85.6655	12.1681	High Carb	0.740759	3.4325	53.5277	M	29.2195	MZ	6.55	TRUE	FALSE	predict6667	predict66671
55	0.049294	0.203373	0.083333	9.26068	1.50139	43.9745	7.16806	UK Average	0.897407	0.678056	53.5277	M	29.2195	MZ	6.56667	TRUE	TRUE	predict6667	predict66671
34	-0.019112	-0.500794	1	11.3827	2.50139	60.8631	6.66806	OGTT	1.14511	0.517222	53.5277	M	29.2195	MZ	6.6	TRUE	TRUE	predict6667	predict66671
46.5	-0.04402	0.193651	0.283333	6.07535	0.001389	71.868	7.33472	UK Average	0.721081	1.03111	53.5277	M	29.2195	MZ	6.63333	TRUE	FALSE	predict6667	predict66671
67.3333	-0.022415	0.726984	0.283333	5.91405	0.001389	48.4082	10.1681	OGTT	0.952881	0.0986111	53.5277	M	29.2195	MZ	6.65	TRUE	FALSE	predict6667	predict66671
68	-0.034618	0.181151	0.333333	4.87429	0.501389	46.9694	9.66806	High Protein	0.703697	0.219167	53.5277	M	29.2195	MZ	6.68333	TRUE	FALSE	predict6667	predict66671
56.6667	0.067845	-0.863294	-1.6	6.12864	0.001389	51.4572	9.00139	High Protein	0.240238	1.99361	53.5277	M	29.2195	MZ	6.7	TRUE	FALSE	predict6667	predict66671
48	-0.041942	0.272123	2.0369	3.67671	2.66806	37.9136	10.1681	High Fat	0.491767	0.290556	48.4353	M	24.4018	DZ	6.41667	TRUE	TRUE	predict6668	predict66681
70.25	0.045967	-0.140377	-0.729762	2.44793	0.668056	19.9174	10.3347	High Carb	1.49897	0.26	48.4353	M	24.4018	DZ	6.45	TRUE	FALSE	predict6668	predict66681
64.75	-1.3e-05	-0.726488	-0.696429	5.11955	0.001389	63.98	10.1681	High Carb	1.25517	0.16	48.4353	M	24.4018	DZ	6.46667	TRUE	FALSE	predict6668	predict66681
64	-0.015496	-0.318155	-0.696429	1.27365	0.334722	66.8855	9.33472	UK Average	1.24945	0.125833	48.4353	M	24.4018	DZ	6.5	TRUE	FALSE	predict6668	predict66681
47.5	0.034688	-0.893155	-0.713095	3.49317	0.501389	57.1706	6.66806	OGTT	1.65461	0.137778	48.4353	M	24.4018	DZ	6.51667	TRUE	FALSE	predict6668	predict66681
49	0.04923	-0.850099	-1.14643	4.05013	0.334722	59.873	6.50139	OGTT	1.54938	0.425833	48.4353	M	24.4018	DZ	6.55	TRUE	FALSE	predict6668	predict66681
55.75	-0.039091	-0.76121	0.303571	3.46944	1.33472	66.2928	9.66806	UK Average	0.84046	0.120556	48.4353	M	24.4018	DZ	6.56667	TRUE	TRUE	predict6668	predict66681
49	-0.035625	2.01101	2.45357	4.74631	0.334722	50.5208	9.00139	High Fibre	1.0958	-2.41806	48.4353	M	24.4018	DZ	6.6	TRUE	TRUE	predict6668	predict66681
55.5	0.023312	-0.02371	-0.713095	1.32754	0.334722	33.3571	9.00139	High Protein	0.589572	0.1625	48.4353	M	24.4018	DZ	6.63333	TRUE	FALSE	predict6668	predict66681
55.6667	0.000672	-0.550099	-0.779762	5.54359	0.001389	64.9467	8.83472	High Protein	0.747215	0.221667	48.4353	M	24.4018	DZ	6.65	TRUE	FALSE	predict6668	predict66681
40.6667	0.037769	-0.900428	1.5641	5.00977	2.00139	48.6879	9.50139	High Fat	0.753062	0.195	48.4353	M	31.2276	DZ	6.41667	TRUE	TRUE	predict6668	predict66682
55.6667	0.020458	0.175961	-0.985897	3.53587	0.001389	33.8287	8.50139	High Carb	1.24522	0.566111	48.4353	M	31.2276	DZ	6.45	TRUE	FALSE	predict6668	predict66682
58	-0.051017	-0.637928	-1.30256	3.32902	1.16806	26.513	9.83472	High Carb	1.56529	0.710556	48.4353	M	31.2276	DZ	6.46667	TRUE	FALSE	predict6668	predict66682
52.5	-0.04136	0.182906	-0.419231	1.80047	0.001389	63.0418	10.6681	UK Average	1.22652	0.106944	48.4353	M	31.2276	DZ	6.5	TRUE	FALSE	predict6668	predict66682
49	0.022179	-1.37682	-0.302564	3.35966	1.83472	45.4673	7.33472	OGTT	1.65259	0.198611	48.4353	M	31.2276	DZ	6.51667	TRUE	FALSE	predict6668	predict66682
48	0.046863	-0.021261	-0.602564	2.17244	0.001389	45.4121	6.83472	OGTT	1.56112	0.187222	48.4353	M	31.2276	DZ	6.55	TRUE	FALSE	predict6668	predict66682
39	-0.065524	-0.108761	0.997436	3.5134	1.33472	45.2517	13.3347	UK Average	1.06773	-1.00417	48.4353	M	31.2276	DZ	6.56667	TRUE	TRUE	predict6668	predict66682
53.3333	0.00701	-0.168483	-0.685897	1.00186	0.168056	48.7174	11.5014	High Fibre	1.44261	0.193611	48.4353	M	31.2276	DZ	6.63333	TRUE	FALSE	predict6668	predict66682
39	0.01143	0.164699	-0.677778	4.44229	1.33472	48.4934	9.83472	MCB	0.772287	0.969444	47.1896	F	20.6812	DZ	6.31667	FALSE	FALSE	predict6669	predict66691
90	-0.018435	-0.172801	-0.894444	4.39146	1.16806	47.3416	11.1681	High Carb	0.737841	0.298889	47.1896	F	20.6812	DZ	6.28333	FALSE	FALSE	predict6669	predict66691
87.6667	0.011733	0.549422	-0.327778	4.36703	1.33472	128.251	11.6681	High Carb	0.778796	0.502778	47.1896	F	20.6812	DZ	6.25	FALSE	FALSE	predict6669	predict66691
61	-0.003417	-0.149189	0.372222	5.65501	2.66806	108.353	10.8347	UK Average	0.49175	0.0847222	47.1896	F	20.6812	DZ	6.2	FALSE	TRUE	predict6669	predict66691
71	0.043975	-0.390856	3.90556	6.89166	4.00139	51.2524	13.0014	OGTT	0.849476	-2.10972	47.1896	F	20.6812	DZ	6.16667	FALSE	TRUE	predict6669	predict66691
84	-0.007502	0.485533	-0.111111	3.33657	1.83472	55.3487	11.3347	UK Average	0.856347	0.31	47.1896	F	20.6812	DZ	6.13333	FALSE	FALSE	predict6669	predict66691
76.6	-0.044035	0.142477	-0.061111	4.18109	1.50139	202.446	10.8347	OGTT	0.996743	-0.561111	47.1896	F	20.6812	DZ	6.1	FALSE	FALSE	predict6669	predict66691
86	-0.029815	0.275811	-0.394444	3.69775	1.83472	48.7988	10.6681	High Fat	0.565225	0.5125	47.1896	F	20.6812	DZ	6.05	FALSE	FALSE	predict6669	predict66691
96	-0.027039	0.224422	-0.411111	5.43973	1.66806	127.56	12.8347	High Protein	0.452426	0.251667	47.1896	F	20.6812	DZ	6.01667	FALSE	FALSE	predict6669	predict66691
87	-0.054255	0.800811	-0.327778	3.57484	1.66806	52.3666	12.3347	High Fibre	0.70047	0.491944	47.1896	F	20.6812	DZ	5.98333	FALSE	FALSE	predict6669	predict66691
82.5	0.029882	1.32421	0.421429	5.58776	0.834722	34.4021	7.83472	MCB	0.823537	0.684722	47.1896	F	38.1699	DZ	6.31667	FALSE	FALSE	predict6669	predict66692
86	-0.046201	-0.403571	-0.995238	6.97024	0.001389	20.2612	5.83472	High Carb	1.41562	2.86833	47.1896	F	38.1699	DZ	6.28333	FALSE	FALSE	predict6669	predict66692
73.3333	-0.04059	-0.898016	-1.01191	6.5255	0.334722	35.3814	13.3347	High Carb	1.62719	3.93361	47.1896	F	38.1699	DZ	6.25	FALSE	FALSE	predict6669	predict66692
62	-0.056339	-1.26746	-0.711905	8.89523	0.501389	43.5159	5.33472	UK Average	1.14782	1.37222	47.1896	F	38.1699	DZ	6.2	FALSE	TRUE	predict6669	predict66692
62.5	-0.040113	0.547818	0.038095	10.8965	0.001389	44.0537	10.1681	OGTT	1.02947	3.14472	47.1896	F	38.1699	DZ	6.16667	FALSE	TRUE	predict6669	predict66692
62	-0.081303	0.54504	-0.845238	11.798	0.501389	59.0933	7.33472	UK Average	1.35228	2.59889	47.1896	F	38.1699	DZ	6.13333	FALSE	FALSE	predict6669	predict66692
68.6667	0.059374	-0.527182	-0.845238	7.55349	0.501389	32.1279	3.83472	OGTT	1.36476	0.482222	47.1896	F	38.1699	DZ	6.1	FALSE	FALSE	predict6669	predict66692
66	-0.020832	-1.34246	-0.411905	10.7188	0.334722	30.9128	13.8347	High Fat	0.838631	1.135	47.1896	F	38.1699	DZ	6.05	FALSE	FALSE	predict6669	predict66692
69	0.005457	-1.02441	-0.661905	13.9373	8.66806	35.3456	13.8347	High Fibre	1.62305	2.71833	47.1896	F	38.1699	DZ	6.01667	FALSE	FALSE	predict6669	predict66692
80	0.070722	-1.53274	-0.861905	12.3688	0.334722	48.2481	13.3347	High Protein	1.15156	3.83361	47.1896	F	38.1699	DZ	5.98333	FALSE	FALSE	predict6669	predict66692
45.3333	-0.026655	0.31379	-0.953571	1.89659	0.001389	33.8154	11.8347	High Fat	0.791467	0.611667	39.1075	F	27.9483	MZ	7.3	TRUE	FALSE	predict6683	predict66831
62.5	-0.017766	0.908234	0.063095	1.86069	0.668056	43.0521	10.3347	High Carb	0.986759	0.506111	39.1075	F	27.9483	MZ	7.33333	TRUE	TRUE	predict6683	predict66831
57.3333	-0.012021	1.0374	0.513095	1.44	2.16806	39.135	8.66806	High Carb	1.01515	0.221111	39.1075	F	27.9483	MZ	7.36667	TRUE	TRUE	predict6683	predict66831
20	0.031108	-3.07232	-0.286905	3.10323	1.66806	26.1264	8.50139	OGTT	1.68554	-1.50361	39.1075	F	27.9483	MZ	7.38333	TRUE	FALSE	predict6683	predict66831
21	-0.012	1.90546	-0.220238	1.25101	0.501389	34.06	7.16806	OGTT	1.5159	-1.63778	39.1075	F	27.9483	MZ	7.41667	TRUE	FALSE	predict6683	predict66831
68.75	0.029245	-0.891239	-0.508974	2.41909	1.33472	43.5173	7.33472	High Fat	0.673284	0.940556	39.1075	F	23.6813	MZ	7.3	TRUE	FALSE	predict6683	predict66832
61.5	0.003415	-0.66485	-0.425641	4.77109	1.5	42.093	7.66806	High Carb	0.838794	1.76333	39.1075	F	23.6813	MZ	7.33333	TRUE	TRUE	predict6683	predict66832
54.6667	0.021983	-0.442628	-0.458974	1.16674	0.001389	27.0462	8	High Carb	0.731058	0.426667	39.1075	F	23.6813	MZ	7.36667	TRUE	TRUE	predict6683	predict66832
60.5	0.008404	0.214316	-0.342308	1.62864	1.66806	29.5968	9.66806	OGTT	1.14199	0.586667	39.1075	F	23.6813	MZ	7.38333	TRUE	FALSE	predict6683	predict66832
53	-0.009396	-0.135684	-0.408974	5.44972	1.50139	34.9726	7.16806	UK Average	0.609989	0.668889	39.1075	F	23.6813	MZ	7.41667	TRUE	FALSE	predict6683	predict66832
66.3333	0.018191	-1.0843	-0.392308	1.79811	1.00139	59.7577	7.83472	UK Average	0.570508	0.699722	39.1075	F	23.6813	MZ	7.45	TRUE	FALSE	predict6683	predict66832
53.75	-0.00579	-1.01624	-0.625641	2.84591	2.00139	37.7174	12.8347	OGTT	0.955791	0.848056	39.1075	F	23.6813	MZ	7.48333	TRUE	FALSE	predict6683	predict66832
41.5	-0.046224	-0.960684	-0.175641	0.877709	1.66806	46.7489	9.33472	High Protein	0.36852	0.521389	39.1075	F	23.6813	MZ	7.5	TRUE	FALSE	predict6683	predict66832
61	0.005732	-0.192628	-0.208974	3.77348	1.33472	43.4398	8.66806	High Fibre	0.873244	0.828056	39.1075	F	23.6813	MZ	7.53333	TRUE	TRUE	predict6683	predict66832
48	0.029046	0.601587	0.315476	2.97221	2.16806	43.9933	8.33472	High Fat	0.807699	0.504167	57.7276	F	27.5983	DZ	7.73333	TRUE	TRUE	predict671	predict6712
70.5	-0.031715	-0.563691	-0.867857	1.69458	0.334722	44.6361	11.1681	UK Average	1.36011	1.72083	57.7276	F	27.5983	DZ	6.81667	FALSE	FALSE	predict671	predict6712
56	-0.023393	-0.752579	-0.367857	1.90402	0.834722	41.3382	10.1681	UK Average	1.04353	0.446111	57.7276	F	27.5983	DZ	6.85	FALSE	FALSE	predict671	predict6712
39.25	0.001391	-0.463691	-0.484524	2.88721	1.33472	24.7674	12.6681	OGTT	1.43577	0.911111	57.7276	F	27.5983	DZ	6.88333	FALSE	FALSE	predict671	predict6712
48	-0.033617	0.323809	0.715476	2.82489	0.001389	36.8745	10.6681	OGTT	1.67643	0.286111	57.7276	F	27.5983	DZ	6.91667	FALSE	FALSE	predict671	predict6712
53	-0.007309	0.977976	0.015476	1.84585	0.001389	38.5224	9.00139	High Fibre	1.09696	0.801389	57.7276	F	27.5983	DZ	6.95	FALSE	TRUE	predict671	predict6712
52	0.050345	0.129365	0.365476	2.03413	0.001389	40.6433	11.6681	High Protein	0.795033	0.531944	57.7276	F	27.5983	DZ	6.96667	FALSE	TRUE	predict671	predict6712
52.3333	0.033625	0.065476	-0.05119	2.12743	1.66806	49.475	8.33472	High Protein	0.78837	0.601667	57.7276	F	27.5983	DZ	7	FALSE	FALSE	predict671	predict6712
69	0.066652	0.053526	-0.435897	2.24645	0.834722	37.5059	6.83472	MCB	0.280282	1.57417	48.3943	F	26.0213	MZ	5.78333	FALSE	FALSE	predict6777	predict67771
81	0.042912	-0.415919	-1.06923	3.5041	0.501389	34.8558	6.16806	High Carb	1.02875	0.770278	48.3943	F	26.0213	MZ	5.75	FALSE	FALSE	predict6777	predict67771
68.25	-0.052503	1.77019	0.164103	5.60298	0.168056	50.3569	5.66806	High Carb	0.956401	0.892778	48.3943	F	26.0213	MZ	5.71667	FALSE	FALSE	predict6777	predict67771
58.25	0.010311	-1.72703	-2.36923	8.41417	1.33472	30.1195	13.0014	UK Average	1.05368	3.6375	48.3943	F	26.0213	MZ	5.68333	FALSE	TRUE	predict6777	predict67771
71.25	0.049163	0.06047	0.097436	3.58541	0.001389	27.3483	12.0014	OGTT	1.27249	1.56333	48.3943	F	26.0213	MZ	6.56667	TRUE	FALSE	predict6777	predict67771
55.5	-0.023076	-2.0562	-0.085897	10.2392	1.16806	26.0078	7.33472	High Protein	0.506055	0.727778	48.3943	F	26.0213	MZ	6.48333	TRUE	FALSE	predict6777	predict67771
70	-0.031186	1.1063	0.180769	2.68919	1.50139	38.1609	8.33472	High Fat	0.673239	0.615833	48.3943	F	26.0213	MZ	6.45	TRUE	FALSE	predict6777	predict67771
70.5	0.048813	-0.232143	-0.67381	2.97275	1.66806	42.1996	6.33472	High Fat	0.800763	2.65972	48.3943	F	23.0501	MZ	5.83333	FALSE	FALSE	predict6777	predict67772
63.75	0.032811	1.34008	-0.32381	4.13253	0.001389	38.9887	6.66806	MCB	0.827877	2.41694	48.3943	F	23.0501	MZ	5.78333	FALSE	FALSE	predict6777	predict67772
60.25	-0.047025	0.678968	-0.640476	4.40519	1.00139	38.4601	6.83472	High Carb	1.07067	2.61056	48.3943	F	23.0501	MZ	5.75	FALSE	FALSE	predict6777	predict67772
61.3333	-0.007714	0.602579	-0.72381	1.98003	1.66806	41.1952	6.33472	High Carb	0.917066	2.83917	48.3943	F	23.0501	MZ	5.71667	FALSE	FALSE	predict6777	predict67772
38.25	-0.064144	-0.383532	-0.07381	4.27611	0.501389	30.4507	7.00139	OGTT	1.22562	1.85083	48.3943	F	23.0501	MZ	6.6	TRUE	FALSE	predict6777	predict67772
67.5	-0.014457	0.615079	-0.87381	8.03502	0.168056	34.553	6.50139	UK Average	0.979708	2.75361	48.3943	F	23.0501	MZ	6.56667	TRUE	FALSE	predict6777	predict67772
73.75	-0.11291	-0.01131	-1.12381	3.05746	0.168056	36.1193	6.16806	High Fat	0.59171	3.07167	48.3943	F	23.0501	MZ	6.53333	TRUE	FALSE	predict6777	predict67772
67.5	0.063611	0.267857	0.192857	3.06013	0.501389	31.4345	8.16806	High Fibre	0.807835	2.32639	48.3943	F	23.0501	MZ	6.48333	TRUE	FALSE	predict6777	predict67772
69.3333	-0.044037	-0.239087	0.52619	3.59859	1.00139	17.9707	13.0014	High Protein	0.575366	1.86222	48.3943	F	23.0501	MZ	6.45	TRUE	FALSE	predict6777	predict67772
79.3333	0.017327	-1.30228	-0.339286	3.39225	2.00139	25.7355	7.33472	High Fat	0.578326	1.05528	59.1102	F	27.18	MZ	8.03333	FALSE	FALSE	predict6783	predict67831
22.25	0.006349	-0.55367	-0.605952	5.34119	2.50139	25.3316	11.3347	MCB	0.701769	0.8475	59.1102	F	27.18	MZ	8.01667	FALSE	TRUE	predict6783	predict67831
29	-0.037763	0.160218	0.744048	4.4438	0.834722	20.1344	8.83472	High Carb	0.879128	0.655	59.1102	F	27.18	MZ	8	FALSE	TRUE	predict6783	predict67831
64.6667	-0.070282	-0.743948	-0.289286	2.46397	2.00139	30.3665	8.00139	High Carb	1.26212	0.783056	59.1102	F	27.18	MZ	8	FALSE	FALSE	predict6783	predict67831
55	-0.011922	-0.093948	-0.389286	2.42015	0.334722	38.7261	11.0014	UK Average	0.937317	0.868333	59.1102	F	27.18	MZ	7.98333	FALSE	FALSE	predict6783	predict67831
33.4	0.02994	-1.41617	-1.88929	3.77967	3.16806	24.843	10.5014	OGTT	1.30158	0.136111	59.1102	F	27.18	MZ	7.96667	FALSE	FALSE	predict6783	predict67831
55	-0.022372	0.061607	0.744048	1.66002	0.168056	34.4309	10.1681	UK Average	1.11488	0.415278	59.1102	F	27.18	MZ	7.95	FALSE	FALSE	predict6783	predict67831
38.3333	0.022933	-2.14673	-2.37262	1.8368	2.66806	32.7805	8.50139	OGTT	1.67946	0.615	59.1102	F	27.18	MZ	7.93333	FALSE	FALSE	predict6783	predict67831
27.75	0.016516	1.413	0.827381	4.29307	1.83472	17.6153	13.1681	High Protein	0.504025	0.211944	59.1102	F	27.18	MZ	7.91667	FALSE	TRUE	predict6783	predict67831
35.25	0.033465	0.228274	0.660714	3.49922	2.66806	27.2101	11.1681	High Fat	0.805337	0.349444	59.1102	F	27.18	MZ	7.9	FALSE	TRUE	predict6783	predict67831
49	-0.005552	-0.15367	-0.589286	1.74976	-7.66667	27.4233	11.3347	High Fibre	1.14431	1.06139	59.1102	F	27.18	MZ	7.85	FALSE	FALSE	predict6783	predict67831
87.3333	0.03823	-1.69957	-1.55128	5.32294	0.001389	34.4252	9.50139	High Carb	1.36354	1.10722	47.3238	F	27.4621	MZ	6.73333	FALSE	TRUE	predict6788	predict67882
86.3333	-0.023823	2.22404	1.16538	2.69314	2.50139	32.1567	7.83472	High Carb	1.33619	0.600278	47.3238	F	27.4621	MZ	6.68333	FALSE	TRUE	predict6788	predict67882
76	-0.023592	1.54904	0.998718	4.41635	1.00139	20.9968	10.3347	OGTT	1.77472	0.145833	47.3238	F	27.4621	MZ	6.65	FALSE	FALSE	predict6788	predict67882
76.25	0.015313	-1.97318	-0.984615	3.12047	1.83472	26.8783	10.8347	UK Average	1.10912	0.925	47.3238	F	27.4621	MZ	6.61667	FALSE	FALSE	predict6788	predict67882
78	-0.011087	1.40043	0.382051	3.3499	0.168056	30.3844	9.66806	MCB	1.43764	0.939167	47.3238	F	27.4621	MZ	6.58333	FALSE	FALSE	predict6788	predict67882
72.75	-0.006482	-0.755128	-0.001282	2.06995	4.50139	34.6549	9.33472	High Fat	0.773163	1.04583	47.3238	F	27.4621	MZ	6.5	FALSE	FALSE	predict6788	predict67882
77	0.029643	-1.64263	-1.51795	4.28402	2.83472	34.1221	11.1681	High Protein	1.25311	0.609722	47.3238	F	27.4621	MZ	6.46667	FALSE	TRUE	predict6788	predict67882
61.75	-0.048585	0.950099	-0.683333	3.29255	0.001389	30.4333	6.66806	UK Average	0.828816	0.525278	54.6146	F	30.4688	MZ	5.75	TRUE	FALSE	predict6811	predict68111
76	-0.008334	1.3626	0.383333	2.28002	0.501389	25.5724	8.83472	UK Average	0.832461	0.4225	54.6146	F	30.4688	MZ	5.78333	TRUE	FALSE	predict6811	predict68111
71.75	-0.027994	1.2501	0.116667	3.53024	0.668056	26.0914	13.8347	High Fat	0.771721	0.319444	54.6146	F	30.4688	MZ	5.8	TRUE	FALSE	predict6811	predict68111
60	-0.02623	0.038988	1.7	4.2459	2.50139	19.7885	9.00139	OGTT	1.66907	-2.6625	54.6146	F	30.4688	MZ	5.86667	TRUE	TRUE	predict6811	predict68111
59	-0.006446	-0.179068	0.216667	3.75683	0.001389	23.8834	9.16806	High Carb	1.39187	0.622222	54.6146	F	30.4688	MZ	5.88333	TRUE	FALSE	predict6811	predict68111
64	-0.040631	0.584821	0.4	4.21484	0.668056	26.7632	9.00139	OGTT	1.30701	0.427778	54.6146	F	30.4688	MZ	5.91667	TRUE	FALSE	predict6811	predict68111
42.75	-0.024688	-0.37629	-0.666667	5.86977	0.834722	45.6489	13.0014	High Fibre	0.912054	1.04583	54.6146	F	30.4688	MZ	5.93333	TRUE	FALSE	predict6811	predict68111
57	0.019313	0.950298	-0.625	3.57879	0.168056	38.8668	7.50139	UK Average	0.866292	0.287778	54.6146	F	29.5944	MZ	5.75	TRUE	FALSE	predict6811	predict68112
78	-0.007369	-0.046925	-0.641667	2.87221	0.001389	33.5327	9.16806	UK Average	1.03483	0.706944	54.6146	F	29.5944	MZ	5.78333	TRUE	FALSE	predict6811	predict68112
28	0.033879	-0.545536	-0.875	2.4103	1.66806	35.2411	10.8347	High Fat	0.885367	0.605833	54.6146	F	29.5944	MZ	5.8	TRUE	FALSE	predict6811	predict68112
43.6667	0.012106	-0.038591	-0.175	3.41634	3.16806	11.5423	7.66806	OGTT	1.4405	1.20972	54.6146	F	29.5944	MZ	5.83333	TRUE	TRUE	predict6811	predict68112
35.4	0.065684	-1.85109	1.30833	3.68886	0.168056	12.4834	8.83472	High Carb	1.27706	0.626667	54.6146	F	29.5944	MZ	5.86667	TRUE	TRUE	predict6811	predict68112
38.75	-0.101034	1.56419	0.608333	2.60746	0.001389	32.7666	10.0014	OGTT	1.77234	0.400278	54.6146	F	29.5944	MZ	5.88333	TRUE	FALSE	predict6811	predict68112
46	0.055617	0.089187	-0.675	3.58924	1.00139	39.3325	9.33472	High Carb	1.19849	0.419722	54.6146	F	29.5944	MZ	5.91667	TRUE	FALSE	predict6811	predict68112
70	-0.107337	-2.9497	-0.525	3.81333	3.66806	27.136	7.50139	High Fibre	1.07323	1.08639	54.6146	F	29.5944	MZ	5.93333	TRUE	FALSE	predict6811	predict68112
100	0.004575	-2.06369	-0.965476	4.11741	0.834722	48.7557	7.50139	High Fat	1.05331	1.81	56.8761	F	24.1232	DZ	6.65	TRUE	FALSE	predict685	predict6851
100	-0.035465	0.346031	-0.282143	2.82002	0.168056	53.4326	8.50139	High Fat	1.10892	1.26528	56.8761	F	24.1232	DZ	6.68333	TRUE	FALSE	predict685	predict6851
100	0.041462	-0.834524	-0.365476	2.00986	0.834722	46.4176	6.50139	High Carb	1.31114	1.14472	56.8761	F	24.1232	DZ	6.7	TRUE	FALSE	predict685	predict6851
100	0.005179	0.508531	-0.365476	3.94544	0.168056	54.0477	6.00139	High Carb	1.12325	1.2	56.8761	F	24.1232	DZ	6.73333	TRUE	FALSE	predict685	predict6851
66	0.01082	-0.17758	0.417857	2.21112	2.66806	36.3047	10.3347	OGTT	1.53009	1.11111	56.8761	F	24.1232	DZ	6.76667	TRUE	TRUE	predict685	predict6851
93.5	-0.02516	0.955754	1.15119	2.9039	0.001389	38.6231	12.1681	UK Average	1.24289	0.837778	56.8761	F	24.1232	DZ	6.78333	TRUE	TRUE	predict685	predict6851
98.75	-0.004404	-0.035913	-0.332143	2.3069	0.001389	57.7519	7.00139	UK Average	1.44924	0.829167	56.8761	F	24.1232	DZ	6.83333	TRUE	FALSE	predict685	predict6851
100	-0.001598	-0.219246	-0.632143	1.37594	0.001389	50.19	7.16806	High Protein	0.973054	1.23056	56.8761	F	24.1232	DZ	6.86667	TRUE	FALSE	predict685	predict6851
94	0.00527	-0.276191	-0.565476	1.20157	0.668056	45.0241	6.83472	High Fibre	1.36423	0.864167	56.8761	F	24.1232	DZ	6.9	TRUE	FALSE	predict685	predict6851
100	0.024178	-1.32202	-0.565476	2.51689	0.668056	57.4021	7.33472	High Protein	0.814407	1.36139	56.8761	F	24.1232	DZ	6.91667	TRUE	FALSE	predict685	predict6851
56.5	0.028748	-0.151488	-0.992857	3.09274	0.668056	56.4871	8.83472	High Fat	0.993097	1.93528	56.8761	F	32.3323	DZ	6.68333	TRUE	FALSE	predict685	predict6852
64.5	-0.051909	0.554068	-0.009524	4.38166	0.501389	62.1377	8.66806	High Carb	1.70479	3.59444	56.8761	F	32.3323	DZ	6.7	TRUE	FALSE	predict685	predict6852
64	0.00945	-0.290377	-0.02619	3.05047	1.50139	33.323	8.00139	High Carb	1.28806	1.02444	56.8761	F	32.3323	DZ	6.73333	TRUE	FALSE	predict685	predict6852
46	-0.055536	-0.057043	0.190476	2.60223	0.001389	55.4507	7.66806	UK Average	1.10555	0.755278	56.8761	F	32.3323	DZ	6.76667	TRUE	TRUE	predict685	predict6852
49	0.031099	0.752679	0.690476	1.76389	0.001389	51.885	7.50139	OGTT	1.64144	0.757222	56.8761	F	32.3323	DZ	6.78333	TRUE	TRUE	predict685	predict6852
45.5	0.014707	-1.09871	-1.10952	2.31324	0.501389	26.2143	13.1681	OGTT	1.36901	1.47778	56.8761	F	32.3323	DZ	6.81667	TRUE	FALSE	predict685	predict6852
58.5	-0.004591	0.606845	-0.242857	4.20709	0.001389	59.3903	8.83472	UK Average	1.33091	0.81	56.8761	F	32.3323	DZ	6.83333	TRUE	FALSE	predict685	predict6852
52	0.008543	0.424901	0.37381	1.51576	2.00139	57.5574	9.16806	High Fibre	1.41729	1.25778	56.8761	F	32.3323	DZ	6.86667	TRUE	FALSE	predict685	predict6852
57.5	0.02645	-0.48621	-0.542857	1.37161	0.001389	35.4363	10.5014	High Protein	1.08034	1.7625	56.8761	F	32.3323	DZ	6.9	TRUE	FALSE	predict685	predict6852
44.3333	0.016071	-1.3001	0.140476	1.3951	1.33472	38.2745	10.5014	High Protein	1.26243	1.56528	56.8761	F	32.3323	DZ	6.91667	TRUE	FALSE	predict685	predict6852
57	0.026464	0.654961	0.20119	3.31339	1.33472	29.8039	6.16806	MCB	0.869684	0.335	42.7488	M	24.7404	MZ	7.65	FALSE	FALSE	predict6885	predict68851
62.3333	0.029412	-0.803373	-0.19881	2.10227	0.834722	35.2595	6.66806	High Carb	0.879575	0.468333	42.7488	M	24.7404	MZ	7.61667	FALSE	TRUE	predict6885	predict68851
63	-0.046324	-1.78671	-0.24881	4.63356	1.33472	60.3805	8.33472	High Carb	0.980194	1.80833	42.7488	M	24.7404	MZ	7.58333	FALSE	TRUE	predict6885	predict68851
48.6667	-0.014716	1.19802	-0.015476	11.175	0.334722	42.48	7.00139	UK Average	0.735495	0.101389	42.7488	M	24.7404	MZ	7.56667	FALSE	FALSE	predict6885	predict68851
57.3333	0.004971	-1.62837	-1.19881	12.4792	0.334722	45.196	12.5014	UK Average	1.21279	0.25	42.7488	M	24.7404	MZ	7.53333	FALSE	FALSE	predict6885	predict68851
37.5	0.026065	0.150794	-0.165476	5.61095	0.334722	40.9808	7.33472	OGTT	1.11346	0.0958333	42.7488	M	24.7404	MZ	7.5	FALSE	FALSE	predict6885	predict68851
48.75	-0.050777	-1.37976	-0.915476	2.74734	0.501389	49.5419	6.83472	High Fat	0.81263	0.318056	42.7488	M	24.7404	MZ	7.45	FALSE	FALSE	predict6885	predict68851
38.3333	-0.048471	1.17857	-0.182143	4.01839	0.334722	45.3497	7.16806	High Protein	0.892144	0.294444	42.7488	M	24.7404	MZ	7.4	FALSE	TRUE	predict6885	predict68851
66	-0.045686	0.403174	-0.078571	8.74987	0.001389	40.6152	11.1681	MCB	1.06624	0.565278	42.7488	M	23.1605	MZ	7.65	FALSE	FALSE	predict6885	predict68852
54.5	-0.003347	-1.63294	-0.295238	6.0572	1.66806	37.0808	6.66806	High Carb	0.847354	1.5425	42.7488	M	23.1605	MZ	7.61667	FALSE	TRUE	predict6885	predict68852
53.5	-0.032304	0.489286	0.021429	11.3232	0.001389	37.487	7.83472	High Carb	0.949312	0.513889	42.7488	M	23.1605	MZ	7.58333	FALSE	TRUE	predict6885	predict68852
47.5	-0.015427	1.54484	0.038095	8.02293	0.001389	54.7556	8.50139	UK Average	1.01859	0.1175	42.7488	M	23.1605	MZ	7.56667	FALSE	FALSE	predict6885	predict68852
28.3333	-0.041543	-0.474603	-0.211905	13.0675	0.001389	35.4855	6.83472	OGTT	1.07029	0.126111	42.7488	M	23.1605	MZ	7.53333	FALSE	FALSE	predict6885	predict68852
37	-0.018768	-0.144048	-0.278571	9.29004	0.168056	45.0345	13.0014	UK Average	0.86461	0.265278	42.7488	M	23.1605	MZ	7.5	FALSE	FALSE	predict6885	predict68852
39.8	-0.037274	-0.712103	-0.645238	7.60859	1.16806	30.7959	7.16806	OGTT	1.19407	0.678611	42.7488	M	23.1605	MZ	7.48333	FALSE	FALSE	predict6885	predict68852
44.5	0.080735	-0.569048	-0.195238	13.2063	0.001389	28.1928	12.1681	High Fat	0.830244	0.332222	42.7488	M	23.1605	MZ	7.45	FALSE	FALSE	predict6885	predict68852
39.5	0.012801	-0.448214	-0.378571	3.55823	1.16806	27.9901	6.50139	High Fibre	0.984044	0.9575	42.7488	M	23.1605	MZ	7.41667	FALSE	TRUE	predict6885	predict68852
20.5	0.072599	-0.738492	1.67143	3.58195	3.00139	42.4737	6.83472	High Protein	0.89347	0.651389	42.7488	M	23.1605	MZ	7.4	FALSE	TRUE	predict6885	predict68852
86.5	0.012611	-3.48869	-0.672619	5.54728	0.501389	38.6951	6.83472	High Fat	0.734872	3.89611	54.7899	F	31.8416	MZ	7.96667	FALSE	FALSE	predict6903	predict69032
86.5	-0.042054	1.46687	-0.722619	4.58273	0.001389	35.2821	7.16806	MCB	0.910766	3.93611	54.7899	F	31.8416	MZ	7.95	FALSE	FALSE	predict6903	predict69032
88.5	0.039729	-0.572024	-0.639286	2.64022	1.66806	30.4238	7.00139	High Carb	1.03001	3.89056	54.7899	F	31.8416	MZ	7.93333	FALSE	FALSE	predict6903	predict69032
89	0.030413	0.169643	-0.105952	1.6273	1.00139	33.9675	9.16806	High Carb	0.839034	2.21833	54.7899	F	31.8416	MZ	7.91667	FALSE	TRUE	predict6903	predict69032
87.5	0.002199	2.57103	1.94405	1.21714	0.168056	24.8908	10.6681	UK Average	0.976327	0.606944	54.7899	F	31.8416	MZ	7.9	FALSE	TRUE	predict6903	predict69032
98	-0.032747	-1.86508	-0.639286	1.01664	0.668056	30.9956	6.83472	UK Average	0.964819	3.27528	54.7899	F	31.8416	MZ	7.88333	FALSE	FALSE	predict6903	predict69032
87	0.004617	-0.955357	-0.689286	4.2575	1.66806	54.021	13.1681	OGTT	1.37638	4.45	54.7899	F	31.8416	MZ	7.86667	FALSE	FALSE	predict6903	predict69032
92.3333	-2.6e-05	-0.562302	-0.689286	3.05553	1.66806	35.7111	6.66806	OGTT	1.20003	3.96667	54.7899	F	31.8416	MZ	7.85	FALSE	FALSE	predict6903	predict69032
97	0.017234	-0.478968	-0.705952	1.50575	1.16806	31.9487	6.66806	High Fat	0.788981	3.67111	54.7899	F	31.8416	MZ	7.83333	FALSE	FALSE	predict6903	predict69032
98	-0.008684	-0.078968	-0.772619	1.20098	1.00139	30.7815	7.33472	High Protein	0.754364	3.34167	54.7899	F	31.8416	MZ	7.8	FALSE	FALSE	predict6903	predict69032
91.6667	-0.070151	2.20298	2.07738	1.78749	4.16806	34.489	11.0014	High Fibre	0.994026	0.838889	54.7899	F	31.8416	MZ	7.78333	FALSE	TRUE	predict6903	predict69032
85.5	0.028897	-0.07242	-1.25833	5.29248	1.16806	39.3728	12.6681	MCB	0.772844	0.3975	49.3717	F	28.9704	MZ	5.98333	TRUE	FALSE	predict6910	predict69101
86.25	0.01522	-2.0252	-0.925	7.48125	1.66806	70.7575	13.8347	High Carb	1.30873	0.174167	49.3717	F	28.9704	MZ	5.95	TRUE	FALSE	predict6910	predict69101
86.75	0.011819	-0.464087	-0.941667	3.74781	1.16806	61.2169	7.66806	High Carb	1.08731	0.200556	49.3717	F	28.9704	MZ	5.9	TRUE	TRUE	predict6910	predict69101
44	-0.01619	0.626191	1.70833	1.87064	1.83472	69.6968	7.00139	OGTT	1.42158	-2.37167	49.3717	F	28.9704	MZ	5.86667	TRUE	TRUE	predict6910	predict69101
71.6667	-0.060086	1.86925	1.725	5.76024	3.50139	49.5943	11.8347	UK Average	1.32026	-2.07778	49.3717	F	28.9704	MZ	5.83333	TRUE	FALSE	predict6910	predict69101
82	0.044744	-0.261309	-0.958333	2.35743	1.33472	54.685	9.33472	OGTT	1.17214	0.0552778	49.3717	F	28.9704	MZ	5.8	TRUE	FALSE	predict6910	predict69101
54.3333	-0.015653	0.809524	-0.791667	4.9277	2.00139	31.4584	7.50139	UK Average	0.899796	0.0316667	49.3717	F	28.9704	MZ	5.76667	TRUE	FALSE	predict6910	predict69101
88	0.00982	-1.00714	-1.275	7.12095	1.33472	34.4251	7.16806	High Protein	0.482434	0.243333	49.3717	F	28.9704	MZ	5.73333	TRUE	FALSE	predict6910	predict69101
60	0.009738	0.345635	-0.741667	5.29993	0.001389	52.3986	12.0014	High Fat	0.836893	-0.103056	49.3717	F	28.9704	MZ	5.7	TRUE	FALSE	predict6910	predict69101
65.75	0.07066	1.84772	0.690476	4.7562	1.33472	30.4714	8.66806	High Fat	1.00046	1.5	54.4148	F	24.0575	MZ	6.91667	FALSE	FALSE	predict6913	predict69131
81	0.022295	1.36161	1.25714	2.313	0.001389	43.6972	9.83472	High Carb	1.33344	0.491667	54.4148	F	24.0575	MZ	6.95	FALSE	TRUE	predict6913	predict69131
56.5	-0.031359	-1.47173	-1.10952	4.39433	0.501389	39.884	7.83472	High Carb	1.25849	1.52528	54.4148	F	24.0575	MZ	6.96667	FALSE	TRUE	predict6913	predict69131
67.75	-0.065065	-0.624504	-0.592857	3.65538	0.001389	41.2996	6.00139	OGTT	1.46653	0.912778	54.4148	F	24.0575	MZ	7	FALSE	FALSE	predict6913	predict69131
70.3333	-0.024177	-0.60367	-1.29286	5.36306	0.001389	46.0629	8.83472	UK Average	0.9469	2.67222	54.4148	F	24.0575	MZ	7.03333	FALSE	FALSE	predict6913	predict69131
48	-0.037647	-0.730059	-0.492857	5.89544	1.50139	30.8007	6.83472	OGTT	1.38841	0.955556	54.4148	F	24.0575	MZ	7.06667	FALSE	FALSE	predict6913	predict69131
58.3333	-0.030105	-0.248115	-0.459524	2.47667	0.834722	45.456	9.50139	UK Average	1.04761	1.41389	54.4148	F	24.0575	MZ	7.08333	FALSE	FALSE	predict6913	predict69131
50	-0.016271	0.635218	0.540476	2.36203	2.16806	40.5831	7.66806	High Protein	0.707692	0.291944	54.4148	F	24.0575	MZ	7.15	FALSE	TRUE	predict6913	predict69131
8.5	0.063399	0.306052	1.02381	3.27308	0.168056	35.8325	12.5014	High Protein	0.938332	0.365556	54.4148	F	24.0575	MZ	7.18333	FALSE	TRUE	predict6913	predict69131
57.6667	-0.023649	0.659822	0.609524	3.70689	3.16806	32.4424	10.8347	High Fat	0.940954	1.75306	54.4148	F	30.8022	MZ	6.91667	FALSE	FALSE	predict6913	predict69132
78	-0.046883	-1.27629	-1.67381	5.081	1.50139	27.6598	10.1681	High Carb	1.23005	2.92917	54.4148	F	30.8022	MZ	6.95	FALSE	TRUE	predict6913	predict69132
71.5	-0.048691	0.144544	0.009524	5.09336	1.66806	35.3242	8.66806	High Carb	1.11191	1.61556	54.4148	F	30.8022	MZ	6.96667	FALSE	TRUE	predict6913	predict69132
75	-0.002176	1.65843	0.559524	2.51913	0.834722	30.007	7.50139	UK Average	1.00659	1.30694	54.4148	F	30.8022	MZ	7	FALSE	FALSE	predict6913	predict69132
56.5	0.044183	1.75427	0.37619	2.83595	2.00139	28.9587	7.16806	UK Average	1.09912	1.49722	54.4148	F	30.8022	MZ	7.03333	FALSE	FALSE	predict6913	predict69132
44.8	-0.054254	-0.626289	-0.707143	4.74897	0.334722	27.6303	7.00139	OGTT	1.66029	0.544722	54.4148	F	30.8022	MZ	7.06667	FALSE	FALSE	predict6913	predict69132
42.25	-0.051973	-0.986012	-0.457143	3.72541	0.668056	24.7122	8.16806	OGTT	1.377	0.181944	54.4148	F	30.8022	MZ	7.08333	FALSE	FALSE	predict6913	predict69132
43	-0.04442	1.27232	0.259524	4.14586	1.66806	31.2684	8.50139	High Protein	0.975338	0.864167	54.4148	F	30.8022	MZ	7.15	FALSE	TRUE	predict6913	predict69132
59.5	-0.060381	-2.42629	0.709524	5.54168	1.83472	34.7339	8.16806	High Protein	0.768014	1.00444	54.4148	F	30.8022	MZ	7.18333	FALSE	TRUE	predict6913	predict69132
56.75	0.054263	-0.893651	-0.133333	2.54559	2.33472	38.2202	11.8347	High Fat	0.466631	1.40556	38.6721	F	26.204	MZ	7.78333	FALSE	FALSE	predict6926	predict69261
54.25	0.04518	-1.5756	-1.11667	4.12596	2.33472	58.0507	7.66806	High Fat	0.709768	1.17111	38.6721	F	26.204	MZ	7.8	FALSE	FALSE	predict6926	predict69261
42	0.010693	-0.425596	-1.2	4.13418	2.50139	57.9417	8.00139	High Carb	1.00418	1.43917	38.6721	F	26.204	MZ	7.81667	FALSE	FALSE	predict6926	predict69261
42	0.024178	-1.30476	-0.616667	3.7721	1.50139	72.9223	8.66806	High Carb	0.774764	1.08917	38.6721	F	26.204	MZ	7.85	FALSE	FALSE	predict6926	predict69261
55.5	0.072646	0.31746	-0.616667	4.44177	2.66806	49.3829	11.5014	OGTT	1.31233	1.3625	38.6721	F	26.204	MZ	7.86667	FALSE	TRUE	predict6926	predict69261
70.25	-0.071326	1.83274	1.55	4.73597	1.16806	40.3417	11.3347	OGTT	1.17331	0.131944	38.6721	F	26.204	MZ	7.88333	FALSE	TRUE	predict6926	predict69261
60	-0.024999	0.05496	-1.03333	2.22272	2.16806	42.3877	8.00139	UK Average	0.760158	0.988889	38.6721	F	26.204	MZ	7.9	FALSE	FALSE	predict6926	predict69261
75.5	-0.003826	1.49524	1.48333	2.01556	1.33472	44.2263	10.3347	UK Average	1.07046	0.304444	38.6721	F	26.204	MZ	7.91667	FALSE	FALSE	predict6926	predict69261
67.25	0.05017	-1.59782	-0.966667	6.40755	2.83472	72.193	8.16806	High Fibre	0.728298	0.837778	38.6721	F	26.204	MZ	7.93333	FALSE	FALSE	predict6926	predict69261
57.5	-0.105832	2.69385	1.65	3.12363	0.834722	24.9357	11.8347	High Protein	0.724956	0.352778	38.6721	F	26.204	MZ	7.95	FALSE	FALSE	predict6926	predict69261
71	0.005646	0.681746	2.67619	4.08144	1.00139	41.9284	11.8347	High Fat	0.807286	0.644444	38.5763	F	27.7203	MZ	6.81667	FALSE	FALSE	predict6926	predict69262
48	-0.03881	-1.79881	-1.57381	2.5777	0.168056	63.436	6.66806	High Fat	0.51449	0.386667	38.5763	F	27.7203	MZ	6.85	FALSE	FALSE	predict6926	predict69262
42	-0.0016	1.42619	0.109524	4.63068	1.00139	51.4241	11.6681	High Carb	0.918971	0.615278	38.5763	F	27.7203	MZ	6.88333	FALSE	FALSE	predict6926	predict69262
56	-0.147905	-2.94464	-2.14048	0.878858	1.00139	49.5504	6.33472	High Carb	1.08125	0.215556	38.5763	F	27.7203	MZ	6.91667	FALSE	FALSE	predict6926	predict69262
49	-0.028983	1.72063	1.89286	2.34576	2.00139	14.1736	9.66806	UK Average	1.15538	1.35417	38.5763	F	27.7203	MZ	6.95	FALSE	TRUE	predict6926	predict69262
44	0.012578	2.33175	1.29286	2.17724	2.00139	29.219	12.6681	UK Average	1.34389	0.602222	38.5763	F	27.7203	MZ	6.96667	FALSE	TRUE	predict6926	predict69262
25	0.072328	-0.852977	-0.17381	1.92379	2.66806	60.088	8.00139	OGTT	1.16548	0.263056	38.5763	F	27.7203	MZ	7	FALSE	FALSE	predict6926	predict69262
45	0.003156	0.208135	-0.307143	1.46326	1.16806	66.8816	8.16806	OGTT	0.890969	0.740278	38.5763	F	27.7203	MZ	7.03333	FALSE	FALSE	predict6926	predict69262
46	0.003411	-0.757143	0.209524	3.87289	0.334722	51.7279	11.3347	High Fibre	1.15534	0.5425	38.5763	F	27.7203	MZ	7.06667	FALSE	FALSE	predict6926	predict69262
38.5	0.100296	-1.49881	-1.84048	0.890619	2.66806	61.1717	6.83472	High Protein	0.354891	0.476944	38.5763	F	27.7203	MZ	7.11667	FALSE	FALSE	predict6926	predict69262
58	-0.057107	2.11171	0.066667	2.69263	1.33472	40.061	13.1681	High Fat	0.658332	1.24722	64.5366	M	25.2181	MZ	6.56667	TRUE	TRUE	predict6940	predict69401
86.3333	0.05528	0.561706	0.033333	4.57438	0.834722	38.6543	7.33472	High Carb	1.00329	0.376667	64.5366	M	25.2181	MZ	6.6	TRUE	TRUE	predict6940	predict69401
75	0.068011	-1.0494	-0.266667	2.98328	1.00139	45.5434	9.00139	High Carb	1.29812	0.336111	64.5366	M	25.2181	MZ	6.63333	TRUE	FALSE	predict6940	predict69401
71.3333	0.019466	-0.249405	-0.2	4.33345	1.83472	32.6333	9.00139	UK Average	1.00749	0.332222	64.5366	M	25.2181	MZ	6.65	TRUE	FALSE	predict6940	predict69401
73.6667	-0.014927	-1.30357	-0.55	2.69216	1.16806	25.5506	10.3347	OGTT	1.56391	0.555833	64.5366	M	25.2181	MZ	6.68333	TRUE	FALSE	predict6940	predict69401
66	0.043661	-0.86746	0.15	4.80849	1.33472	46.9868	13.5014	UK Average	0.829052	0.0958333	64.5366	M	25.2181	MZ	6.7	TRUE	FALSE	predict6940	predict69401
60.25	-0.050623	-1.04385	-0.383333	2.84019	0.501389	41.1708	9.66806	OGTT	1.26407	0.3	64.5366	M	25.2181	MZ	6.73333	TRUE	FALSE	predict6940	predict69401
56.6667	-0.018296	-0.146627	-0.95	2.33018	1.16806	27.4025	10.1681	High Protein	0.491474	1.07944	64.5366	M	25.2181	MZ	6.78333	TRUE	TRUE	predict6940	predict69401
61.75	-0.02304	-0.988294	-0.133333	4.24007	0.834722	40.9608	13.1681	High Fibre	0.929231	0.190556	64.5366	M	25.2181	MZ	6.81667	TRUE	FALSE	predict6940	predict69401
63.75	0.025823	-0.742361	-0.42619	3.97243	0.501389	67.6262	7.50139	High Fat	0.995249	2.99722	64.5366	M	25.7093	MZ	6.56667	TRUE	TRUE	predict6940	predict69402
61.6667	-0.0383	-1.71597	-1.35952	4.38617	1.00139	48.5986	9.50139	High Carb	1.4422	0.973889	64.5366	M	25.7093	MZ	6.6	TRUE	TRUE	predict6940	predict69402
33	-0.00149	0.211806	-0.07619	2.16168	0.334722	35.9947	9.00139	UK Average	1.48768	0.495556	64.5366	M	25.7093	MZ	6.65	TRUE	FALSE	predict6940	predict69402
46	-0.010468	1.27708	1.72381	4.55154	3.16806	41.0636	9.50139	OGTT	1.59286	-2.52111	64.5366	M	25.7093	MZ	6.68333	TRUE	FALSE	predict6940	predict69402
19	-0.022555	0.471528	0.440476	2.8597	0.668056	39.9118	8.66806	OGTT	1.48919	-1.26139	64.5366	M	25.7093	MZ	6.7	TRUE	FALSE	predict6940	predict69402
86	-0.090908	0.467362	0.190476	1.89642	0.501389	38.7028	8.33472	UK Average	1.28308	1.70528	64.5366	M	25.7093	MZ	6.73333	TRUE	FALSE	predict6940	predict69402
56	-0.016575	-1.51875	-0.509524	3.94492	1.66806	37.0323	13.8347	High Protein	1.02394	0.468333	64.5366	M	25.7093	MZ	6.76667	TRUE	TRUE	predict6940	predict69402
27.3333	-0.013043	0.40625	0.457143	2.57882	1.16806	38.0233	7.66806	High Protein	0.981378	0.685	64.5366	M	25.7093	MZ	6.78333	TRUE	TRUE	predict6940	predict69402
41.25	-0.084952	0.882639	0.37381	3.94208	2.00139	38.0537	11.6681	High Fibre	1.48151	0.416667	64.5366	M	25.7093	MZ	6.81667	TRUE	FALSE	predict6940	predict69402
91.5	0.010247	-0.786111	-0.111538	2.51474	0.168056	50.7456	9.33472	High Fat	0.868866	0.374167	53.9685	F	26.4361	MZ	7.1	FALSE	FALSE	predict7015	predict70151
83.6667	0.021806	-1.56667	-0.761538	4.0809	1.50139	87.9287	8.83472	MCB	0.801385	0.451944	53.9685	F	26.4361	MZ	7.06667	FALSE	FALSE	predict7015	predict70151
83.75	-0.092487	1.62361	0.171795	2.94419	0.501389	53.039	9.33472	High Carb	1.00069	0.331111	53.9685	F	26.4361	MZ	7.03333	FALSE	FALSE	predict7015	predict70151
84.6667	-0.029677	-0.319444	0.038462	3.0577	3.50139	57.4943	8.33472	OGTT	1.063	0.41	53.9685	F	26.4361	MZ	6.96667	FALSE	TRUE	predict7015	predict70151
93	-0.016914	-0.344444	0.638462	2.82695	0.168056	52.0788	9.33472	UK Average	0.836114	-0.278611	53.9685	F	26.4361	MZ	6.93333	FALSE	TRUE	predict7015	predict70151
95	-0.021375	-0.9375	-1.27821	2.80839	0.834722	54.4663	12.6681	UK Average	1.0247	0.649722	53.9685	F	26.4361	MZ	6.9	FALSE	FALSE	predict7015	predict70151
86.5	0.058008	-0.673611	-0.811538	2.33397	3.33472	50.4944	8.33472	High Fat	0.716063	0.928889	53.9685	F	26.4361	MZ	6.76667	FALSE	FALSE	predict7015	predict70151
100	-0.030665	-0.425496	-0.340476	2.7569	0.168056	44.8944	7.83472	MCB	0.906521	0.345833	53.9685	F	26.8076	MZ	7.06667	FALSE	FALSE	predict7015	predict70152
93.25	0.047114	-0.624107	-0.057143	4.59808	1.33472	72.9608	8.33472	High Carb	0.935067	0.814167	53.9685	F	26.8076	MZ	7.03333	FALSE	FALSE	predict7015	predict70152
99.6667	0.026529	-0.890773	0.059524	2.44142	0.001389	59.2939	8.50139	High Carb	0.86651	0.591667	53.9685	F	26.8076	MZ	7	FALSE	FALSE	predict7015	predict70152
100	-0.01438	-1.33383	-1.65714	4.24287	1.00139	42.4048	7.66806	UK Average	0.900734	0.751389	53.9685	F	26.8076	MZ	6.96667	FALSE	TRUE	predict7015	predict70152
100	0.045097	-0.714385	-1.32381	3.69947	1.66806	46.4963	12.3347	UK Average	1.13887	1.17333	53.9685	F	26.8076	MZ	6.9	FALSE	FALSE	predict7015	predict70152
100	-0.038618	-0.714385	-1.02381	3.90467	0.668056	53.8077	9.83472	OGTT	1.04821	0.876111	53.9685	F	26.8076	MZ	6.86667	FALSE	FALSE	predict7015	predict70152
99.3333	-0.081825	0.239782	0.259524	2.99837	0.334722	43.4225	7.66806	High Fibre	0.850559	-0.433611	53.9685	F	26.8076	MZ	6.8	FALSE	FALSE	predict7015	predict70152
75.5	-0.003762	1.05897	1.76026	4.73102	1.50139	36.4341	7.83472	High Carb	0.959428	0.419444	62.7242	F	23.5142	MZ	7.56667	FALSE	TRUE	predict7022	predict70221
76	-0.002226	0.168697	0.09359	3.07782	0.001389	22.569	8.00139	UK Average	0.960757	1.12583	62.7242	F	23.5142	MZ	7.6	FALSE	FALSE	predict7022	predict70221
52	0.0049	0.446474	0.726923	2.87698	0.334722	35.5972	6.00139	OGTT	1.20726	0.0783333	62.7242	F	23.5142	MZ	7.61667	FALSE	FALSE	predict7022	predict70221
79.6667	-0.016869	1.29786	1.32692	1.81404	0.668056	26.0904	10.8347	UK Average	0.985242	2.37917	62.7242	F	23.5142	MZ	7.65	FALSE	FALSE	predict7022	predict70221
36	0.009246	-1.69519	-0.30641	4.07169	0.001389	19.263	8.00139	OGTT	1.05553	0.546667	62.7242	F	23.5142	MZ	7.66667	FALSE	FALSE	predict7022	predict70221
76	-0.005617	2.79231	1.42692	3.54313	0.001389	29.3842	7.83472	High Protein	0.679374	0.807778	62.7242	F	23.5142	MZ	7.71667	FALSE	TRUE	predict7022	predict70221
81.25	0.02457	0.610363	0.826923	3.06967	0.001389	36.369	6.66806	High Fibre	1.08789	1.55278	62.7242	F	23.5142	MZ	7.73333	FALSE	TRUE	predict7022	predict70221
70.25	0.020017	-1.01061	-1.28788	4.5192	0.501389	35.0673	7.66806	High Carb	1.20976	4.48639	62.7242	F	21.4472	MZ	7.51667	FALSE	FALSE	predict7022	predict70222
61.3333	0.036631	-1.26199	0.212121	2.12059	1.00139	29.0266	8.16806	High Carb	0.954183	1.45306	62.7242	F	21.4472	MZ	7.53333	FALSE	TRUE	predict7022	predict70222
75	-0.065401	3.82551	3.47879	3.6906	0.834722	34.6469	7.83472	High Fat	0.708289	-1.3225	62.7242	F	21.4472	MZ	7.56667	FALSE	TRUE	predict7022	predict70222
72.75	0.010042	0.261616	0.695455	3.45773	1.16806	33.6457	7.66806	UK Average	1.25102	1.8275	62.7242	F	21.4472	MZ	7.61667	FALSE	FALSE	predict7022	predict70222
72	-0.078279	2.28939	2.72879	2.68639	1.50139	26.4641	9.50139	UK Average	1.17847	-1.54167	62.7242	F	21.4472	MZ	7.65	FALSE	FALSE	predict7022	predict70222
24.5	0.059246	-3.06616	-2.20454	4.67299	0.001389	30.4136	8.16806	OGTT	1.24569	1.61306	62.7242	F	21.4472	MZ	7.66667	FALSE	FALSE	predict7022	predict70222
62	-0.057244	-1.17033	-3.32121	4.66573	0.168056	51.7668	7.33472	High Protein	0.841699	5.09917	62.7242	F	21.4472	MZ	7.71667	FALSE	TRUE	predict7022	predict70222
68	0.012929	2.81995	0.978788	2.36483	0.168056	35.1032	7.66806	High Fibre	1.30375	1.2475	62.7242	F	21.4472	MZ	7.73333	FALSE	TRUE	predict7022	predict70222
87.25	-0.02001	0.140179	1.08333	2.77336	0.501389	35.3543	8.50139	High Carb	0.632991	0.785833	50.0862	F	24.4369	DZ	7.13333	TRUE	TRUE	predict7041	predict70412
76.25	0.047335	0.233234	0.366667	3.23326	2.50139	23.0917	7.83472	High Carb	0.820672	0.98	50.0862	F	24.4369	DZ	7.16667	TRUE	TRUE	predict7041	predict70412
83.75	0.01922	-0.166766	-0.683333	3.44401	1.00139	41.5749	7.50139	UK Average	0.776077	0.549444	50.0862	F	24.4369	DZ	7.2	TRUE	FALSE	predict7041	predict70412
78	0.008929	-0.451488	0.066667	3.03679	1.66806	46.3716	7.50139	UK Average	0.308678	0.543889	50.0862	F	24.4369	DZ	7.25	TRUE	FALSE	predict7041	predict70412
74	0.052921	-0.579266	-0.5	1.69888	0.001389	59.3665	7.50139	OGTT	0.90225	3.31139	50.0862	F	24.4369	DZ	7.28333	TRUE	FALSE	predict7041	predict70412
78.6667	0.011724	-0.752877	-0.65	2.93683	0.168056	42.6369	7.16806	High Protein	0.649474	0.578333	50.0862	F	24.4369	DZ	7.3	TRUE	FALSE	predict7041	predict70412
80.5	0.006631	2.0249	1.4	3.00933	1.66806	51.0563	6.00139	High Protein	0.667141	0.406944	50.0862	F	24.4369	DZ	7.33333	TRUE	TRUE	predict7041	predict70412
85.6667	-0.053285	0.391568	1.08333	3.35775	2.00139	41.744	8.16806	High Fibre	0.960339	0.774167	50.0862	F	24.4369	DZ	7.36667	TRUE	TRUE	predict7041	predict70412
81	0.03786	0.170437	0.189286	2.23081	2.16806	51.9221	8.00139	High Fat	0.636264	1.39222	48.4408	F	27.769	MZ	7.28333	TRUE	FALSE	predict7064	predict70641
83.75	-0.032416	-0.830952	-0.260714	2.57334	2.16806	51.1479	8.50139	High Carb	0.887088	1.43361	48.4408	F	27.769	MZ	7.3	TRUE	FALSE	predict7064	predict70641
77.75	-0.037536	1.73155	1.35595	2.01905	3.16806	40.3854	7.83472	High Carb	0.825564	0.676111	48.4408	F	27.769	MZ	7.33333	TRUE	TRUE	predict7064	predict70641
70.75	-0.034567	-0.119841	-0.094048	2.8729	2.66806	59.2788	12.1681	OGTT	0.95758	1.12889	48.4408	F	27.769	MZ	7.36667	TRUE	TRUE	predict7064	predict70641
88	0.014351	0.36627	0.489286	2.53077	0.001389	35.3129	8.66806	UK Average	0.451529	1.06472	48.4408	F	27.769	MZ	7.38333	TRUE	FALSE	predict7064	predict70641
80.5	0.045374	0.969048	-0.027381	2.75825	1.33472	45.0644	8.33472	UK Average	0.572859	1.1325	48.4408	F	27.769	MZ	7.41667	TRUE	FALSE	predict7064	predict70641
73	0.015552	0.021826	0.055952	1.61866	1.33472	43.8502	7.83472	OGTT	0.933432	0.966111	48.4408	F	27.769	MZ	7.45	TRUE	FALSE	predict7064	predict70641
70.75	-0.006319	1.1871	0.189286	3.52865	2.50139	35.4792	11.8347	High Protein	0.177266	0.994722	48.4408	F	27.769	MZ	7.48333	TRUE	FALSE	predict7064	predict70641
88.3333	0.003052	0.285714	0.222619	2.03739	2.16806	34.153	8.00139	High Fibre	0.918831	0.898889	48.4408	F	27.769	MZ	7.5	TRUE	FALSE	predict7064	predict70641
72	-0.002955	0.725992	0.205952	2.47472	2.50139	41.8004	11.3347	High Protein	0.458083	1.38972	48.4408	F	27.769	MZ	7.53333	TRUE	TRUE	predict7064	predict70641
56.75	0.002928	1.48819	0.05119	5.31198	3.00139	41.4522	7.50139	High Fat	0.57539	1.13306	48.4408	F	24.6421	MZ	7.28333	TRUE	FALSE	predict7064	predict70642
67.6667	-0.01748	0.246528	-0.332143	4.86261	0.001389	29.1172	8.66806	High Carb	1.05732	1.10889	48.4408	F	24.6421	MZ	7.3	TRUE	FALSE	predict7064	predict70642
77.25	-0.00255	0.477083	0.617857	5.8987	0.168056	41.65	8.50139	UK Average	0.922302	0.636944	48.4408	F	24.6421	MZ	7.36667	TRUE	TRUE	predict7064	predict70642
22	0.068289	-3.77153	-4.38214	7.1468	0.001389	44.3753	8.16806	OGTT	0.930788	5.39944	48.4408	F	24.6421	MZ	7.41667	TRUE	FALSE	predict7064	predict70642
74.5	0.050028	1.22153	0.60119	6.60605	3.16806	48.6966	8.66806	UK Average	0.722102	0.556111	48.4408	F	24.6421	MZ	7.45	TRUE	FALSE	predict7064	predict70642
56	-0.00999	0.410417	0.084524	6.75517	3.16806	39.9786	8.66806	High Fibre	0.849743	0.58	48.4408	F	24.6421	MZ	7.5	TRUE	FALSE	predict7064	predict70642
82.5	0.002808	-0.859028	0.217857	7.91362	1.16806	55.4524	9.00139	High Protein	0.59926	2.12361	48.4408	F	24.6421	MZ	7.53333	TRUE	TRUE	predict7064	predict70642
66	0.023442	-0.16131	-0.610714	4.1156	0.001389	42.4346	7.83472	High Carb	1.16038	2.25694	46.8337	F	27.7283	DZ	6.45	TRUE	FALSE	predict7098	predict70982
[truncated: 4,746 more rows]

## Sheet: Fig 4
Panels B and C
username	family_id	Morning Alertness (true)	Morning Alertness (predictions from naive model)	Morning Alertness (predictions from full model)
predict10091	predict1009	51.75	49.8374	48.769
predict10091	predict1009	59	49.8374	56.1702
predict10092	predict1009	50	61.7748	65.7658
predict10092	predict1009	36	61.7748	66.2534
predict10092	predict1009	26.5	61.7748	57.213
predict10092	predict1009	73.75	61.7748	63.1943
predict10092	predict1009	43	61.7748	62.3858
predict10181	predict1018	91	80.194	85.6789
predict10181	predict1018	85.75	80.194	82.3068
predict10182	predict1018	84.75	88.8108	83.6689
predict10182	predict1018	92.5	88.8108	88.7578
predict10182	predict1018	86	88.8108	90.0469
predict10182	predict1018	88.75	88.8108	89.5653
predict10332	predict1033	94	84.2209	86.4859
predict10332	predict1033	63	84.2209	78.9297
predict10332	predict1033	87.25	84.2209	90.0854
predict10691	predict1069	79	89.0707	89.5957
predict10691	predict1069	89.3333	89.0707	90.2094
predict10691	predict1069	76.6667	89.0707	80.6086
predict10691	predict1069	78	89.0707	76.1407
predict10691	predict1069	93	89.0707	88.8626
predict10691	predict1069	94	89.0707	90.1376
predict10692	predict1069	87.5	81.287	81.6936
predict10692	predict1069	60.3333	81.287	83.9477
predict10692	predict1069	79	81.287	82.733
predict10692	predict1069	49	81.287	71.9271
predict10692	predict1069	62.2	81.287	69.8973
predict10692	predict1069	77.6667	81.287	81.7612
predict10821	predict1082	78.5	52.299	60.8361
predict10821	predict1082	70	52.299	61.5886
predict10821	predict1082	64.6667	52.299	62.6787
predict11101	predict1110	48.75	59.2167	61.2182
predict11101	predict1110	44	59.2167	61.4219
predict11101	predict1110	33	59.2167	55.0514
predict11101	predict1110	23	59.2167	51.9281
predict11102	predict1110	43.5	64.5885	61.9076
predict11102	predict1110	80	64.5885	65.4568
predict11102	predict1110	68	64.5885	64.4674
predict1113	predict1113	61.3333	53.2709	52.9761
predict1113	predict1113	61.25	53.2709	52.7531
predict1113	predict1113	39	53.2709	44.7401
predict1113	predict1113	50	53.2709	53.9781
predict11191	predict1119	34.25	34.6836	36.7861
predict11191	predict1119	35	34.6836	36.2722
predict11191	predict1119	28	34.6836	26.2151
predict11191	predict1119	28	34.6836	27.9356
predict11261	predict1126	57.6667	51.6126	52.3864
predict11261	predict1126	53	51.6126	42.5548
predict11261	predict1126	22.5	51.6126	46.8879
predict11262	predict1126	49	54.1816	54.7335
predict11262	predict1126	64.75	54.1816	56.4859
predict11262	predict1126	28	54.1816	42.6111
predict11262	predict1126	48.4	54.1816	53.7178
predict11741	predict1174	58	54.718	55.0719
predict11741	predict1174	14	54.718	55.0484
predict11741	predict1174	42	54.718	54.44
predict11741	predict1174	62	54.718	56.7598
predict11831	predict1183	100	81.3351	82.1718
predict11831	predict1183	100	81.3351	80.3635
predict12111	predict1211	32	81.3893	82.1211
predict12111	predict1211	46	81.3893	82.4379
predict12111	predict1211	92.3333	81.3893	76.8513
predict12112	predict1211	91	83.1258	82.632
predict12112	predict1211	93.6667	83.1258	82.5862
predict12112	predict1211	67.5	83.1258	80.4849
predict12112	predict1211	92.5	83.1258	77.0665
predict12112	predict1211	88	83.1258	81.7248
predict12592	predict1259	75.5	71.3525	73.3427
predict12592	predict1259	36	71.3525	64.5464
predict12592	predict1259	78.5	71.3525	74.5403
predict12592	predict1259	70.3333	71.3525	76.1035
predict12651	predict1265	39.5	77.8123	69.8074
predict12651	predict1265	74.5	77.8123	80.57
predict13011	predict1301	63.3333	50.6054	51.6813
predict13011	predict1301	65.5	50.6054	53.3493
predict13011	predict1301	59	50.6054	37.0602
predict13012	predict1301	68	51.5076	55.8917
predict13012	predict1301	48	51.5076	54.792
predict13012	predict1301	67.6667	51.5076	50.9755
predict13012	predict1301	54	51.5076	53.1771
predict13101	predict1310	26.5	32.7946	37.2369
predict13101	predict1310	38	32.7946	23.9628
predict13101	predict1310	26.3333	32.7946	34.6839
predict13102	predict1310	33	39.955	32.5219
predict13102	predict1310	47.25	39.955	39.4362
predict13572	predict1357	83	91.9146	90.9223
predict13572	predict1357	89	91.9146	93.6259
predict13572	predict1357	95.5	91.9146	92.1069
predict13621	predict1362	90.3333	73.3091	79.1977
predict13621	predict1362	66	73.3091	77.0361
predict13621	predict1362	76	73.3091	74.4626
predict13622	predict1362	72	73.9914	75.5082
predict13622	predict1362	81.3333	73.9914	76.8516
predict13622	predict1362	93.6667	73.9914	74.6303
predict13721	predict1372	56	59.0107	61.719
predict13721	predict1372	65	59.0107	63.2317
predict13721	predict1372	73.5	59.0107	58.1785
predict13721	predict1372	55.3333	59.0107	64.7254
predict13722	predict1372	68.5	68.7431	71.988
predict13722	predict1372	71.25	68.7431	70.5934
predict13722	predict1372	87	68.7431	63.3216
predict13722	predict1372	89	68.7431	68.6507
predict13722	predict1372	64.5	68.7431	67.7366
predict13791	predict1379	86.5	77.7834	82.679
predict13791	predict1379	75.5	77.7834	79.5571
predict13791	predict1379	81.5	77.7834	71.9184
predict13791	predict1379	65.5	77.7834	79.2228
predict14251	predict1425	59.5	57.6282	57.9496
predict14251	predict1425	54.75	57.6282	48.3087
predict14251	predict1425	64.5	57.6282	57.183
predict14251	predict1425	60	57.6282	56.0095
predict14252	predict1425	65	67.8377	67.116
predict14252	predict1425	47.75	67.8377	69.7752
predict14252	predict1425	74.4	67.8377	68.1515
predict14252	predict1425	75.3333	67.8377	57.0019
predict14252	predict1425	73.6667	67.8377	66.102
predict14321	predict1432	96.5	77.3202	79.0759
predict14321	predict1432	88.6667	77.3202	86.2087
predict14321	predict1432	72.5	77.3202	84.3001
predict14321	predict1432	59.3333	77.3202	65.9167
predict14321	predict1432	85.5	77.3202	80.7527
predict14322	predict1432	60.25	56.9862	57.8435
predict14322	predict1432	59.3333	56.9862	59.7469
predict14322	predict1432	63	56.9862	58.1294
predict14322	predict1432	47	56.9862	60.0244
predict14631	predict1463	72.6667	62.9039	59.4369
predict14631	predict1463	48.5	62.9039	50.9971
predict14631	predict1463	50.75	62.9039	49.1732
predict14631	predict1463	65	62.9039	58.957
predict14631	predict1463	34.5	62.9039	56.4524
predict14632	predict1463	59	51.8489	51.1441
predict14632	predict1463	69.6667	51.8489	54.5945
predict14632	predict1463	44.3333	51.8489	42.3786
predict14632	predict1463	55.25	51.8489	51.8873
predict14632	predict1463	49	51.8489	53.5133
predict14638	predict14638	71.5	68.9354	72.3324
predict14638	predict14638	67	68.9354	63.795
predict14638	predict14638	67.8	68.9354	68.5412
predict14921	predict1492	54.5	48.275	49.7824
predict14921	predict1492	54	48.275	50.0132
predict14921	predict1492	52.5	48.275	52.3565
predict14921	predict1492	40.5	48.275	46.9409
predict14921	predict1492	43.75	48.275	50.9573
predict14922	predict1492	69.5	59.9857	57.3396
predict14922	predict1492	70.6667	59.9857	58.8408
predict14922	predict1492	79	59.9857	58.6103
predict14922	predict1492	30	59.9857	50.3845
predict14922	predict1492	33.25	59.9857	56.6495
predict15462	predict1546	60	50.5372	51.8994
predict15462	predict1546	51	50.5372	53.4375
predict15462	predict1546	39	50.5372	47.7745
predict15462	predict1546	50	50.5372	49.0003
predict15462	predict1546	49.75	50.5372	48.7359
predict15911	predict1591	61.5	61.1533	64.0146
predict15911	predict1591	75.5	61.1533	67.692
predict15911	predict1591	65	61.1533	60.1667
predict15911	predict1591	67.5	61.1533	52.8245
predict15911	predict1591	36	61.1533	61.8256
predict15912	predict1591	49.3333	45.7247	42.9643
predict16001	predict1600	67	63.1256	60.7329
predict16001	predict1600	75.75	63.1256	62.9703
predict16001	predict1600	64.1429	63.1256	55.8074
predict16001	predict1600	74.5	63.1256	60.4931
predict16001	predict1600	55	63.1256	60.8256
predict16331	predict1633	76.6667	68.1059	67.471
predict16331	predict1633	71	68.1059	67.9128
predict16331	predict1633	59.3333	68.1059	59.4689
predict16331	predict1633	58	68.1059	67.9145
predict16332	predict1633	81.6667	65.6423	66.5164
predict16332	predict1633	54.75	65.6423	68.255
predict16332	predict1633	57	65.6423	69.0663
predict16332	predict1633	59.25	65.6423	64.9473
predict16452	predict1645	45	54.1351	54.0081
predict16452	predict1645	52.6667	54.1351	59.6433
predict16452	predict1645	57	54.1351	54.4736
predict16452	predict1645	50.5	54.1351	46.8038
predict16462	predict1646	61	42.8748	45.9766
predict16462	predict1646	25.6667	42.8748	35.8328
predict16462	predict1646	15	42.8748	41.8813
predict16482	predict1648	69	66.2731	67.3443
predict16482	predict1648	42	66.2731	69.4252
predict16981	predict1698	70.5	61.3466	71.2662
predict16981	predict1698	46	61.3466	52.644
predict16981	predict1698	38	61.3466	51.9125
predict16981	predict1698	67.5	61.3466	63.5097
predict16981	predict1698	35.3333	61.3466	64.3813
predict16982	predict1698	64	67.474	64.7248
predict16982	predict1698	62	67.474	64.4695
predict16982	predict1698	44	67.474	62.6707
predict16982	predict1698	80	67.474	63.3962
predict17091	predict1709	59.3333	64.108	66.4378
predict17091	predict1709	68	64.108	64.7331
predict17091	predict1709	71.3333	64.108	59.6613
predict17091	predict1709	64	64.108	66.3453
predict17091	predict1709	66.75	64.108	63.3138
predict17092	predict1709	60.5	58.4789	61.526
predict17092	predict1709	54	58.4789	50.4464
predict17092	predict1709	55.6667	58.4789	57.3765
predict17092	predict1709	55.5	58.4789	57.1134
predict17092	predict1709	55	58.4789	57.7658
predict17642	predict1764	44	50.8596	44.9502
predict17642	predict1764	18.75	50.8596	45.4537
predict17642	predict1764	47.5	50.8596	52.1546
predict17642	predict1764	53.4	50.8596	54.7062
predict17861	predict1786	81	77.6431	79.7686
predict17861	predict1786	71.6667	77.6431	77.0647
predict17861	predict1786	74	77.6431	69.7136
predict17861	predict1786	80.5	77.6431	78.915
predict17861	predict1786	75.8	77.6431	75.6432
predict17911	predict1791	32	47.4144	48.4702
predict17911	predict1791	48	47.4144	50.1075
predict17911	predict1791	46.5	47.4144	49.1562
predict17911	predict1791	49	47.4144	47.7395
predict17961	predict1796	53.5	48.904	54.3876
predict17961	predict1796	52.25	48.904	52.7451
predict17961	predict1796	55.75	48.904	55.1218
predict17961	predict1796	54	48.904	53.2643
predict17962	predict1796	35.3333	48.4047	51.7145
predict17962	predict1796	48.75	48.4047	41.9777
predict17962	predict1796	51	48.4047	50.5619
predict17971	predict1797	48.3333	57.1952	58.4304
predict17971	predict1797	47	57.1952	49.3873
predict17971	predict1797	56	57.1952	48.7819
predict17971	predict1797	62.5	57.1952	55.5626
predict17971	predict1797	60	57.1952	59.4288
predict17972	predict1797	69	73.9373	75.4255
predict17972	predict1797	80.5	73.9373	68.626
predict17972	predict1797	81.25	73.9373	67.7553
predict17972	predict1797	81	73.9373	78.3333
predict18081	predict1808	87.6667	76.6156	83.4115
predict18081	predict1808	77.3333	76.6156	79.7287
predict18081	predict1808	76	76.6156	75.4269
predict18081	predict1808	83.75	76.6156	75.0251
predict18082	predict1808	74.6667	66.3019	74.1947
predict18082	predict1808	67	66.3019	71.2976
predict18082	predict1808	72.5	66.3019	67.5559
predict18082	predict1808	55	66.3019	60.0356
predict18082	predict1808	74	66.3019	70.9442
predict18168	predict18168	62	59.2204	63.1912
predict18168	predict18168	36.5	59.2204	61.3048
predict18168	predict18168	51	59.2204	62.305
predict18261	predict1826	88.6667	72.9434	77.7875
predict18261	predict1826	68.3333	72.9434	67.1494
predict18261	predict1826	78	72.9434	74.1359
predict18421	predict1842	87.5	84.3022	85.7722
predict18421	predict1842	83	84.3022	87.7361
predict18421	predict1842	79.25	84.3022	80.1415
predict18421	predict1842	90	84.3022	88.9329
predict18421	predict1842	87.75	84.3022	86.9068
predict18421	predict1842	88.75	84.3022	86.0173
predict18681	predict1868	49	52.3335	47.5301
predict18681	predict1868	37.5	52.3335	52.4013
predict18681	predict1868	59	52.3335	45.5691
predict18681	predict1868	39	52.3335	52.978
predict18811	predict1881	64.5	57.2786	58.0265
predict18811	predict1881	15	57.2786	60.6156
predict18811	predict1881	68	57.2786	54.8224
predict18811	predict1881	47	57.2786	57.9839
predict18812	predict1881	85.6667	82.4735	84.4235
predict18812	predict1881	75.5	82.4735	81.8772
predict18812	predict1881	93.3333	82.4735	82.1654
predict18812	predict1881	94.25	82.4735	82.9864
predict18831	predict1883	49	55.3819	58.7061
predict18831	predict1883	50.6667	55.3819	57.848
predict18831	predict1883	28	55.3819	45.7509
predict1891	predict189	68	56.9094	60.2997
predict1891	predict189	61	56.9094	61.2649
predict18991	predict1899	73.5	71.3207	72.4336
predict18991	predict1899	77.5	71.3207	63.8235
predict18991	predict1899	79.75	71.3207	72.7025
predict18991	predict1899	78	71.3207	73.7509
predict18991	predict1899	76.5	71.3207	73.7576
predict18992	predict1899	76.25	66.443	66.1752
predict18992	predict1899	82	66.443	69.4908
predict18992	predict1899	75	66.443	65.281
predict18992	predict1899	58.75	66.443	67.638
predict19251	predict1925	75.6667	64.5183	65.8479
predict19251	predict1925	77.75	64.5183	67.6333
predict19251	predict1925	61.5	64.5183	64.3104
predict19251	predict1925	58	64.5183	68.2601
predict19251	predict1925	61	64.5183	67.0879
predict19252	predict1925	82	72.7192	72.3123
predict19252	predict1925	62	72.7192	62.3134
predict19252	predict1925	76.6667	72.7192	71.4542
predict19252	predict1925	78	72.7192	71.1002
predict19252	predict1925	52.5	72.7192	70.5041
predict19401	predict1940	68.5	60.8988	63.9684
predict19401	predict1940	75	60.8988	63.725
predict19401	predict1940	43.25	60.8988	49.1106
predict19401	predict1940	20	60.8988	43.8192
predict19401	predict1940	62.75	60.8988	61.9076
predict19611	predict1961	85	75.3138	76.0338
predict19611	predict1961	81	75.3138	79.3007
predict19611	predict1961	85	75.3138	76.8717
predict19611	predict1961	89	75.3138	79.3762
predict19612	predict1961	75	59.1058	57.9631
predict19612	predict1961	59.75	59.1058	61.7278
predict19612	predict1961	53.25	59.1058	52.8599
predict19612	predict1961	47.75	59.1058	62.0101
predict20322	predict2032	66	70.9011	74.3965
predict20322	predict2032	70.6667	70.9011	75.4612
predict20322	predict2032	72.75	70.9011	74.1689
predict20322	predict2032	74	70.9011	72.1594
predict20322	predict2032	76.5	70.9011	71.3063
predict20322	predict2032	64.6667	70.9011	72.7001
predict20361	predict2036	64	41.3878	45.1988
predict20361	predict2036	25	41.3878	38.6432
predict20361	predict2036	31.6667	41.3878	37.0948
predict20361	predict2036	54	41.3878	43.0687
predict20361	predict2036	36	41.3878	41.8076
predict20362	predict2036	84.5	71.3162	71.9527
predict20362	predict2036	78.5	71.3162	71.2337
predict20362	predict2036	81.6667	71.3162	71.0306
predict20362	predict2036	68	71.3162	66.251
predict20362	predict2036	58	71.3162	72.1242
predict20432	predict2043	67.5	75.7485	92.9563
predict20432	predict2043	81.5	75.7485	90.7062
predict20432	predict2043	85.3333	75.7485	90.0098
predict20561	predict2056	54.3333	56.3534	59.3972
predict20561	predict2056	50.5	56.3534	46.1816
predict20561	predict2056	50.75	56.3534	49.2826
predict20561	predict2056	65	56.3534	56.7893
predict20561	predict2056	60.75	56.3534	56.3557
predict20562	predict2056	56.2	60.0378	59.0031
predict20562	predict2056	67	60.0378	54.4188
predict20562	predict2056	63.6667	60.0378	62.2013
predict20562	predict2056	58	60.0378	62.0551
predict20562	predict2056	60.5	60.0378	60.8574
predict20591	predict2059	82	75.8781	80.58
predict20591	predict2059	86.25	75.8781	81.6694
predict20591	predict2059	87.75	75.8781	73.334
predict20591	predict2059	24	75.8781	72.8457
predict20591	predict2059	79	75.8781	83.0737
predict20821	predict2082	77.5	75.4357	77.0717
predict20821	predict2082	71.3333	75.4357	79.0255
predict20821	predict2082	84.3333	75.4357	80.5895
predict20821	predict2082	79	75.4357	68.3709
predict20821	predict2082	83.75	75.4357	77.6221
predict20821	predict2082	78	75.4357	78.8354
predict20822	predict2082	85.75	75.333	77.4663
predict20822	predict2082	75	75.333	76.4201
predict20822	predict2082	74.3333	75.333	75.7579
predict20822	predict2082	71.75	75.333	70.658
predict20951	predict2095	65	58.897	63.4266
predict20951	predict2095	89	58.897	61.8397
predict20951	predict2095	86	58.897	63.3257
predict20951	predict2095	47	58.897	58.9981
predict20951	predict2095	77.3333	58.897	65.7703
predict21021	predict2102	56.5	46.2939	52.4209
predict21021	predict2102	57	46.2939	52.4062
predict21021	predict2102	8	46.2939	43.6389
predict21021	predict2102	25	46.2939	52.5143
predict21021	predict2102	60.5	46.2939	51.6793
predict21022	predict2102	51	59.828	63.9496
predict21022	predict2102	51	59.828	66.0197
predict21022	predict2102	60	59.828	56.129
predict21022	predict2102	51	59.828	54.4642
predict21022	predict2102	23	59.828	62.422
predict21041	predict2104	48.3333	47.6829	48.0313
predict21041	predict2104	28.25	47.6829	47.858
predict21041	predict2104	30	47.6829	41.7515
predict21041	predict2104	38	47.6829	48.2476
predict21041	predict2104	39.25	47.6829	47.3733
predict21042	predict2104	53.75	57.2	55.6323
predict21042	predict2104	44.75	57.2	55.931
predict21042	predict2104	43.3333	57.2	56.9778
predict21042	predict2104	46.75	57.2	47.9285
predict21042	predict2104	61.3333	57.2	53.0849
predict21082	predict2108	43.25	64.0314	66.1448
predict21082	predict2108	68	64.0314	68.6647
predict21082	predict2108	53	64.0314	54.0416
predict21391	predict2139	52	50.7905	50.9717
[truncated: 3,000 more rows]

## Sheet: Fig 5
Panel A			Panel B: Shapley values																									Panel C
[truncated: 834 more rows]

[truncated: 11 more sheets: Table 1, Table 2, Table 3, Table S1, Table S2, Table S3, Fig S1, Fig S2, Fig S3, Fig S4, Fig S5]
